# Supplementary material for: Rhenium-catalyzed C–H aminocarbonylation of azobenzenes with isocyanates
Source: Royal Society of Chemistry journal article supplement (doi:10.1039/c5ob01121c), 2015-01-01

## Supporting Information

### **Rhenium-Catalyzed C-H Aminocarbonylation of Azobenzenes with Isocyanates**

Xiaoyu Geng and Congyang Wang\*

*Beijing National Laboratory for Molecular Sciences, CAS Key Laboratory of Molecular  
Recognition and Function, Institute of Chemistry, Chinese Academy of Sciences, Beijing 100190,  
China.*

*Emails: wangcy@iccas.ac.cn*

#### **Table of Contents**

|                                                                  |     |
|------------------------------------------------------------------|-----|
| 1. General information .....                                     | S2  |
| 2. General procedure for the preparation of azobenzenes.....     | S3  |
| 3. General procedure for the preparation of isocyanates .....    | S5  |
| 4. Rhenium-catalyzed C-H aminocarbonylation of azobenzenes ..... | S11 |
| 4.1 Optimization of reaction conditions.....                     | S11 |
| 4.2 Typical procedure for C-H aminocarbonylation .....           | S13 |
| 4.3 Characterization of <i>o</i> -azobenzamides.....             | S14 |
| 5. Mechanistic studies.....                                      | S32 |
| 6. Synthetic transformations of <i>o</i> -azobenzamides .....    | S47 |
| 7. References.....                                               | S51 |
| 8. Spectra of products .....                                     | S51 |

## 1. General Information

Unless otherwise noted, all Re-catalyzed reactions were carried out in oven-dried vessels with Teflon screw caps under a nitrogen atmosphere by using standard Schlenk techniques. Reaction temperatures are recorded on the temperature of the oil bath. Anhydrous solvents were purified and dried following standard procedures. Air-sensitive liquids and solutions were transferred via syringes. Anilines were purchased from J&K Chemicals, Inc. and sodium acetate and bromobenzene-d5 were purchased from Alfa Aesar. The catalysts,  $\text{Re}_2(\text{CO})_{10}$ ,  $\text{Re}(\text{CO})_5\text{Br}$ ,  $\text{Re}(\text{CO})_5\text{Cl}$  were obtained from Strem Chemicals, Inc., USA. All purchased chemicals were used as received without further purification. TLC analysis was performed on pre-coated, glass-backed silica gel plates and visualized with UV light. Flash column chromatography was performed on silica gel (200-300 mesh).

$^1\text{H}$  and  $^{13}\text{C}$  NMR spectra were recorded on a Bruker AV 400 spectrometer and calibrated using TMS (0 ppm  $^1\text{H}$ ) or  $\text{CDCl}_3$  (77.16 ppm  $^{13}\text{C}$ ). Abbreviations are used in the description of NMR data as follows: chemical shift ( $\delta$ , ppm), multiplicity (s = singlet, d = doublet, t = triplet, q = quartet, m = multiplet), coupling constant ( $J$ , Hz). Melting points acquired by an electrothermal melting point apparatus, were uncorrected. The infrared spectra (IR) were recorded on FT-IR spectrometer Thermo Fisher Nicolet 6700. The mass spectra (MS) were recorded on a SHIMADZU QP-2010SE GC-MS spectrometer. The high resolution mass spectra were measured on a Bruker APEX IV FTMS mass spectrometer (ESI) in positive-ion mode and a Bruker BIFLEX III mass spectrometer (MALDI-TOF).

## 2. General procedure for the preparation of azobenzenes

### *General procedure A for the synthesis of azobenzenes*

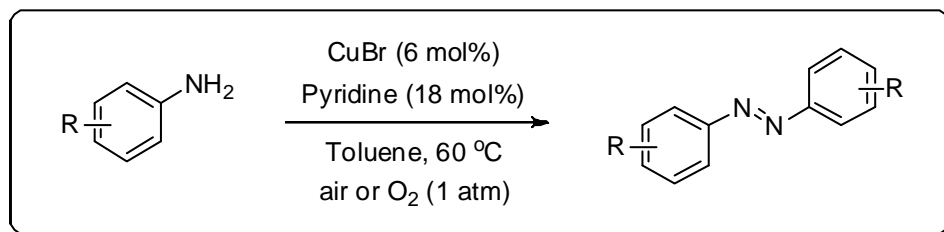

CuBr (0.6 mmol), pyridine (1.8 mmol), and aniline (20 mmol) were mixed in toluene (80 mL) under air (1 atm) or O<sub>2</sub> (1 atm). The mixture was stirred vigorously at 60 °C for 24 h. After cooling down to room temperature and concentrating under vacuum, the residue was purified by flash chromatography on a short silica gel (eluent: petroleum ether/ethyl acetate) to afford azobenzenes.

### *General procedure B for the synthesis of azobenzenes*

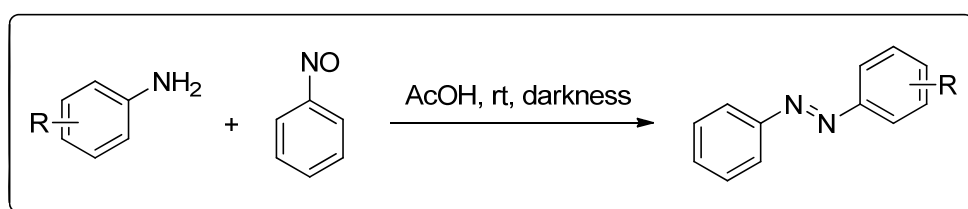

To a round bottom flask equipped with a stir bar was combined aniline (12 mmol, 1.2 equiv) and nitrosobenzene (10 mmol, 1.0 equiv) in acetic acid (100 mL) as solvent. The flask was covered with aluminum foil and the mixture was stirred at room temperature for 48 h. The reaction mixture was diluted with hexane and washed with water (250 mL). The organic layer was dried over Na<sub>2</sub>SO<sub>4</sub>, concentrated. The residue was subjected to flash column chromatography to afford the azobenzenes (PE/EA=20:1).

The following azobenzenes displayed spectroscopic properties fully in accord with those published.

**(E)-1,2-Diphenyldiazene (1a)**<sup>1a</sup> from aniline according to general procedure A.

**(E)-1,2-Di-*p*-tolylidiazene (1b)**<sup>1a</sup> from *p*-toluidine according to general procedure A.

**(E)-1,2-Di-*p*-tert-butylidiazene (1c)**<sup>1b</sup> From 4-tert-butylaniline following general procedure A.

**(E)-1,2-Bis(4-methoxyphenyl)diazene (1d)**<sup>1a</sup> from *p*-anisidine according to general procedure A.

**(E)-1,2-Bis(4-(trifluoromethoxy)phenyl)diazene (1e)**<sup>1a</sup> from 4-trifluoromethoxyaniline according to general procedure A.

**(E)-1,2-Di-*p*-trifluoromethylidiazene (1f)**<sup>1b</sup> from 4-trifluoromethylaniline following general procedure A.

**(E)-1,2-Di-*o*-tolylidiazene (1g)**<sup>1a</sup> from *o*-toluidine according to general procedure A.

**(E)-1,2-Di-*o*-methoxydiazene (1h)**<sup>1b</sup> from *o*-anisidine following general procedure A using O<sub>2</sub> as oxidant.

**(E)-1,2-Bis(2,4-dimethylphenyl)diazene (1i)**<sup>1a</sup> from 2,4-dimethylaniline according to general procedure A.

**(E)-1,2-Bis(3,5-dimethylphenyl)diazene (1j)**<sup>1a</sup> from 2,4-dimethylaniline according to general procedure A.

**(E)-1,2-Di-*m*-tolylidiazene (1k)**<sup>1a</sup> from *m*-toluidine according to general procedure A.

**(E)-1-(2,4,6-trimethylphenyl)-2-phenyldiazene (1l)**<sup>2</sup> from nitrosobenzene and 2,4,6-trimethylaniline according to general procedure B.

**(E)-1-(3,5-dimethylphenyl)-2-phenyldiazene (1m)**<sup>2</sup> from nitrosobenzene and 3,5-dimethylaniline according to general procedure B.

### 3. General procedure for the preparation of isocyanates.

#### *General procedure A for the synthesis of isocyanates.*

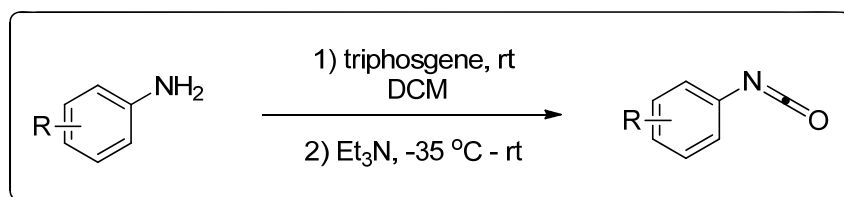

To a stirred DCM (50 mL) solution of triphosgene (22 mmol) was added a DCM (10 mL) solution of aniline (20 mmol) dropwise. After 30 min the mixture was cooled to -35°C and Et<sub>3</sub>N (6 mL) was added dropwise. The mixture was warmed to room temperature slowly and stirred for 2 hours. After removal of solvent under vacuum, the slurry residue was partially distilled or sublimed to give isocyanates.

#### *General procedure B for the synthesis of isocyanates.*

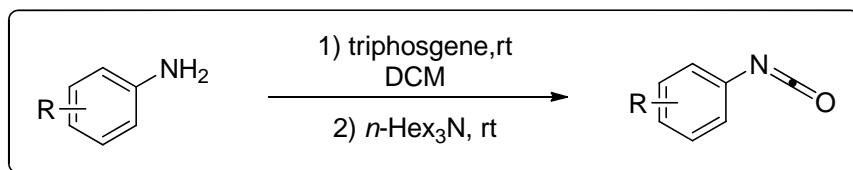

To a stirred DCM (50 mL) solution of triphosgene (22 mmol) was added a DCM (10 mL) solution of aniline (20 mmol) dropwise, after 30 min, *n*-Hex<sub>3</sub>N (22 mmol) was added dropwise. The mixture was stirred for 3 hours. After concentrating under vacuum, the oily mixture was partially distilled to give isocyanates.

The following isocyanates, which are commercially available from Alfa Aesar, were used as received: **4-Biphenyl isocyanate (2c)**, **2-Naphthyl isocyanate (2o)**, ***n*-Butyl isocyanate (2p)**, **Cyclopentyl isocyanate (2q)**, **Benzyl isocyanate (2r)**.

#### **Characterization data for isocyanates.**

##### **Phenyl isocyanate (2a)<sup>3a</sup>**

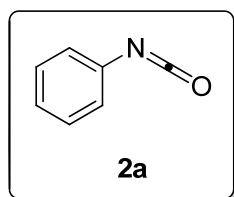

According to method B: aniline (20 mmol), triphosgene (22 mmol) in DCM (10 mL) were stirred at room temperature. After workup, partial distillation afforded the title compound as

colorless liquid in 60 % yield.

$^1\text{H NMR}$  ( $\text{CDCl}_3$ , 400 MHz)  $\delta$  7.32 - 7.28 (m, 2H), 7.20 - 7.16 (m, 1H), 7.09 - 7.06 (m, 2H).

$^{13}\text{C NMR}$  ( $\text{CDCl}_3$ , 101 MHz)  $\delta$  133.6, 129.6, 125.8, 124.8.

### *p*-Tolyl isocyanate (**2b**)<sup>3b</sup>

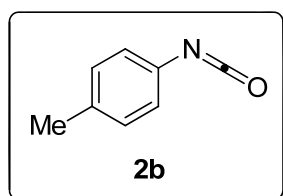

According to method A: *p*-toluidine (20 mmol), triphosgene (22 mmol) in DCM (10 mL) were stirred at  $-35^\circ\text{C}$ . After workup, partial distillation afforded the title compound as colorless liquid in 61 % yield.

$^1\text{H NMR}$  ( $\text{CDCl}_3$ , 400 MHz)  $\delta$  7.09 (d,  $J = 8.0$  Hz, 2H), 7.96 (d,  $J = 8.0$  Hz, 2H), 2.31 (s, 3H).

$^{13}\text{C NMR}$  ( $\text{CDCl}_3$ , 101 MHz)  $\delta$  135.6, 130.8, 130.2, 124.6, 21.0.

### *p*-Methoxyphenyl isocyanate (**2d**)<sup>3c</sup>

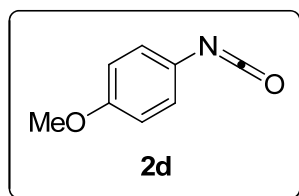

According to method A: *p*-anisidine (20 mmol), triphosgene (22 mmol) in DCM (10 mL) were stirred at  $-35^\circ\text{C}$ . After workup, partial distillation afforded the title compound as colorless liquid in 57 % yield.

$^1\text{H NMR}$  ( $\text{CDCl}_3$ , 400 MHz)  $\delta$  7.02 (d,  $J = 8.8$  Hz, 2H), 6.82 (d,  $J = 8.8$  Hz, 2H), 3.78 (s, 3H).

$^{13}\text{C NMR}$  ( $\text{CDCl}_3$ , 101 MHz)  $\delta$  157.5, 126.1, 125.7, 114.9, 55.6.

### *p*-Trifluoromethoxyphenyl isocyanate (**2e**)

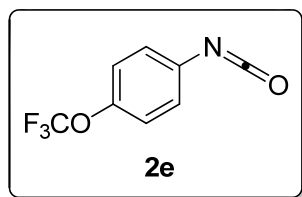

According to method A: *p*-trifluoromethoxyaniline (20 mmol), triphosgene (22 mmol) in DCM (10 mL) were stirred at  $-35^\circ\text{C}$ . After workup, partial distillation afforded the title compound as colorless liquid in 56 % yield.

**<sup>1</sup>H NMR (CDCl<sub>3</sub>, 400 MHz) δ** 7.19 - 7.16 (m, 2H), 7.13 - 7.10 (m, 2H).

**<sup>13</sup>C NMR (CDCl<sub>3</sub>, 101 MHz) δ** 146.8, 132.4, 126.1, 122.4, 120.5 (q, <sup>1</sup>J<sub>C-F</sub> = 257.6 Hz).

**<sup>19</sup>F NMR (CDCl<sub>3</sub>, 565 MHz) δ** -58.1.

**HRMS (ESI-MS):** calculated for C<sub>8</sub>H<sub>5</sub>O<sub>2</sub>NF<sub>3</sub> ([M+H]<sup>+</sup>): 204.02667, found: 204.02651.

### ***p*-Trifluoromethylphenyl isocyanate (2f)**

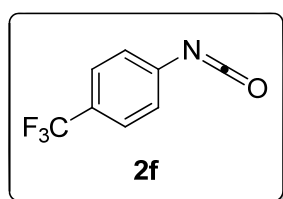

According to method A: *p*-trifluoromethylaniline (20 mmol), triphosgene (22 mmol) in DCM (10 mL) were stirred at -35 °C. After workup, partial distillation afforded the title compound as colorless liquid in 60 % yield.

**<sup>1</sup>H NMR (CDCl<sub>3</sub>, 400 MHz) δ** 7.56 (d, *J* = 8.4 Hz, 2H), 7.17 (d, *J* = 8.4 Hz, 2H).

**<sup>13</sup>C NMR (CDCl<sub>3</sub>, 101 MHz) δ** 137.2, 128.1 (q, <sup>2</sup>J<sub>C-F</sub> = 33.2 Hz), 126.9 (q, <sup>3</sup>J<sub>C-F</sub> = 3.8 Hz), 125.1, 124.0 (q, <sup>1</sup>J<sub>C-F</sub> = 273.8 Hz).

**<sup>19</sup>F NMR (CDCl<sub>3</sub>, 565 MHz) δ** -62.1.

**HRMS (ESI-MS):** calculated for C<sub>8</sub>H<sub>5</sub>ONF<sub>3</sub> ([M+H]<sup>+</sup>): 188.03178, found: 188.03189.

### ***p*-Fluorophenyl isocyanate (2g)<sup>3d</sup>**

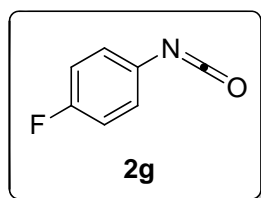

According to method B: *p*-fluoroaniline (20 mmol), triphosgene (22 mmol) in DCM (10 mL) were stirred at -35 °C. After workup, partial distillation afforded the title compound as colorless liquid in 50 % yield.

**<sup>1</sup>H NMR (CDCl<sub>3</sub>, 400 MHz) δ** 7.07 - 6.98 (m, 4H).

**<sup>13</sup>C NMR (CDCl<sub>3</sub>, 101 MHz) δ** 160.5 (d, <sup>1</sup>J<sub>C-F</sub> = 247.5 Hz), 129.6, 126.2 (d, <sup>3</sup>J<sub>C-F</sub> = 9.1 Hz), 116.5 (d, <sup>2</sup>J<sub>C-F</sub> = 23.2 Hz).

**<sup>19</sup>F NMR (CDCl<sub>3</sub>, 565 MHz) δ** -118.2.

***p*-Chlorophenyl isocyanate (2h)<sup>3c</sup>**

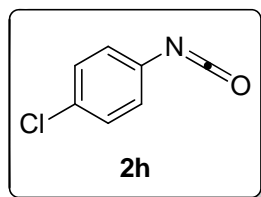

According to method A: *p*-chloroaniline (20 mmol), triphosgene (22 mmol) in DCM (10 mL) were stirred at -35 °C. After workup, partial distillation afforded the title compound as colorless liquid in 50 % yield.

<sup>1</sup>H NMR (CDCl<sub>3</sub>, 400 MHz) δ 7.27 (d, *J* = 8.4 Hz, 2H), 7.01 (d, *J* = 8.4 Hz, 2H).

<sup>13</sup>C NMR (CDCl<sub>3</sub>, 101 MHz) δ 132.1, 131.3, 129.7, 125.9.

***p*-Bromophenyl isocyanate (2i)<sup>3d</sup>**

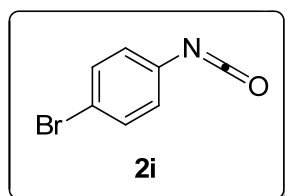

According to method A: *p*-bromoaniline (20 mmol), triphosgene (22 mmol) in DCM (10 mL) were stirred at -35 °C. After workup, partial distillation afforded the title compound as colorless liquid in 63 % yield.

<sup>1</sup>H NMR (CDCl<sub>3</sub>, 400 MHz) δ 7.42 (d, *J* = 8.8 Hz, 2H), 6.95 (d, *J* = 8.8 Hz, 2H).

<sup>13</sup>C NMR (CDCl<sub>3</sub>, 101 MHz) δ 132.7, 132.7, 126.4, 119.1.

***p*-Iodophenyl isocyanate (2j)<sup>3e</sup>**

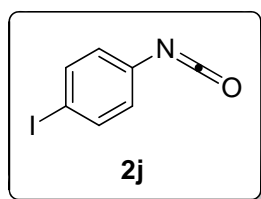

According to method A: *p*-iodoaniline (20 mmol), triphosgene (22 mmol) in DCM (10 mL) were stirred at -35 °C. After workup, sublimation afforded the title compound as colorless solid in 60 % yield.

<sup>1</sup>H NMR (CDCl<sub>3</sub>, 400 MHz) δ 7.61 (d, *J* = 8.4 Hz, 2H), 6.82 (d, *J* = 8.4 Hz, 2H).

<sup>13</sup>C NMR (CDCl<sub>3</sub>, 101 MHz) δ 138.7, 133.4, 126.7, 89.9.

***o*-Tolyl isocyanate (2k)<sup>3f</sup>**

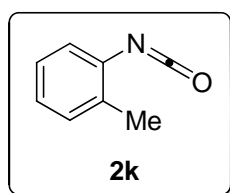

According to method A: *o*-toluidine (20 mmol), triphosgene (22 mmol) in DCM (10 mL) were stirred at -35 °C. After workup, partial distillation afforded the title compound as colorless liquid



in 50 % yield.

**<sup>1</sup>H NMR (CDCl<sub>3</sub>, 400 MHz) δ** 7.19 - 7.17 (m, 1H), 7.16 - 7.12 (m, 1H), 7.11 - 7.07 (m, 1H), 7.06 - 7.04 (m, 1H), 2.32 (s, 3H).

**<sup>13</sup>C NMR (CDCl<sub>3</sub>, 101 MHz) δ** 133.0, 132.5, 130.8, 127.1, 125.9, 125.1, 18.4.

### ***o*-Chlorophenyl isocyanate (2l)<sup>3d</sup>**

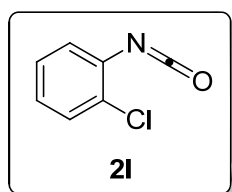

According to method A: *o*-chloroaniline (20 mmol), triphosgene (22 mmol) in DCM (10 mL) were stirred at -35 °C. After workup, partial distillation afforded the title compound as colorless liquid in 50 % yield.

**<sup>1</sup>H NMR (CDCl<sub>3</sub>, 400 MHz) δ** 7.40 (dd,  $J_1 = 8.0$  Hz,  $J_2 = 1.6$  Hz, 1H), 7.23 - 7.17 (m, 1H), 7.15 - 7.10 (m, 2H).

**<sup>13</sup>C NMR (CDCl<sub>3</sub>, 101 MHz) δ** 131.9, 130.9, 129.9, 127.9, 126.7, 125.4.

### ***m*-Tolyl isocyanate (2m)<sup>3f</sup>**

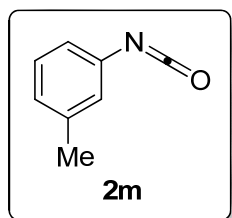

According to method A: *o*-toluidine (20 mmol), triphosgene (22 mmol) in DCM (10 mL) were stirred at -35 °C. After workup, partial distillation afforded the title compound as colorless liquid in 50 % yield. The obtained product is identical to a commercially available sample.

**<sup>1</sup>H NMR (CDCl<sub>3</sub>, 400 MHz) δ** 7.18 (t,  $J = 8.4$  Hz, 1H), 7.00 - 6.98 (m, 1H), 6.90 - 6.87 (m, 2H), 2.32 (s, 3H).

**<sup>13</sup>C NMR (CDCl<sub>3</sub>, 101 MHz) δ** 139.8, 133.4, 129.4, 126.7, 125.5, 121.8, 21.3.

### **3,5-Dimethylphenyl isocyanate (2n)<sup>3d</sup>**

According to method A: 3,5-dimethylaniline (20 mmol), triphosgene (22 mmol) in DCM (10 mL) were stirred at -35 °C. After workup, partial distillation afforded the title compound as colorless liquid in 62 % yield.

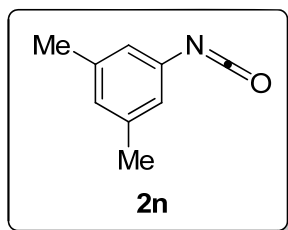

**$^1\text{H}$  NMR (CDCl<sub>3</sub>, 400 MHz)  $\delta$  6.81 (s, 1H), 6.70 (s, 2H),  
2.27 (s, 6H).**

**$^{13}\text{C}$  NMR (CDCl<sub>3</sub>, 101 MHz)  $\delta$  139.5, 133.2, 127.6, 122.5,  
21.2.**

## 4. Re-catalyzed C-H aminocarbonylation of azobenzenes

### 4.1 Optimization of reaction conditions

Table S1. Survey of the reaction parameters<sup>a</sup>

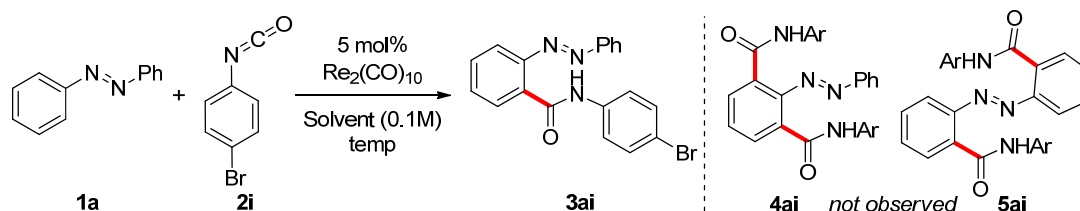

| Entry              | Cat.                                 | <b>1a</b> (eq)/ <b>2i</b> (eq) | Temp (°C) | Solvent                | Yield (%) <sup>b</sup> |
|--------------------|--------------------------------------|--------------------------------|-----------|------------------------|------------------------|
| 1                  | ---                                  | 1/2.5                          | 150       | Toluene                | 0                      |
| 2                  | $\text{Re}_2(\text{CO})_{10}$        | 1/2.5                          | 150       | Toluene                | 60                     |
| 3                  | $\text{Re}_2(\text{CO})_{10}$        | 1/2.5                          | 150       | DCE                    | 46                     |
| 4                  | $\text{Re}_2(\text{CO})_{10}$        | 1/2.5                          | 150       | Xylene                 | 58                     |
| 5                  | $\text{Re}_2(\text{CO})_{10}$        | 1/2.5                          | 150       | $\text{CCl}_4$         | 0                      |
| 6                  | $\text{Re}_2(\text{CO})_{10}$        | 1/2.5                          | 150       | $\text{CH}_3\text{CN}$ | 0                      |
| 7                  | $\text{Re}_2(\text{CO})_{10}$        | 1/2.5                          | 150       | THF                    | 60                     |
| 8                  | $\text{Re}_2(\text{CO})_{10}$        | 1/2.5                          | 150       | Dioxane                | 55                     |
| 9                  | $\text{Re}_2(\text{CO})_{10}$        | 1/2.5                          | 150       | Cyclohexane            | 55                     |
| 10                 | $\text{Re}_2(\text{CO})_{10}$        | 1/2                            | 150       | Toluene                | 54                     |
| 11                 | $\text{Re}_2(\text{CO})_{10}$        | 1/1.5                          | 150       | Toluene                | 39                     |
| 12                 | $\text{Re}_2(\text{CO})_{10}$        | 1/1                            | 150       | Toluene                | 32                     |
| 13                 | $\text{Re}_2(\text{CO})_{10}$        | 1.5/1                          | 150       | Toluene                | 39                     |
| 14                 | $\text{Re}_2(\text{CO})_{10}$        | 2/1                            | 150       | Toluene                | 47                     |
| 15                 | $\text{Re}_2(\text{CO})_{10}$        | 2.5/1                          | 150       | Toluene                | 54                     |
| 16                 | $\text{Re}_2(\text{CO})_{10}$        | 2.5/1                          | 140       | Toluene                | 69                     |
| 17                 | $\text{Re}_2(\text{CO})_{10}$        | 2.5/1                          | 130       | Toluene                | 72                     |
| 18                 | $\text{Re}_2(\text{CO})_{10}$        | 1/2.5                          | 130       | Toluene                | 64                     |
| 19                 | $\text{Re}_2(\text{CO})_{10}$        | 2.5/1                          | 120       | Toluene                | 0                      |
| 20 <sup>c</sup>    | $\text{Re}_2(\text{CO})_{10}$        | 2.5/1                          | 130       | Toluene                | 74                     |
| 21 <sup>c, d</sup> | $\text{Re}_2(\text{CO})_{10}$        | 2.5/1                          | 130       | Toluene                | 77 (75) <sup>h</sup>   |
| 22 <sup>e</sup>    | $\text{Re}_2(\text{CO})_{10}$        | 2.5/1                          | 130       | Toluene                | 72                     |
| 23 <sup>f</sup>    | $\text{Re}_2(\text{CO})_{10}$        | 2.5/1                          | 130       | Toluene                | 47                     |
| 24 <sup>g</sup>    | $\text{Re}_2(\text{CO})_{10}$        | 2.5/1                          | 130       | Toluene                | 48                     |
| 25                 | $\text{Re}(\text{CO})_5\text{Cl}$    | 2.5/1                          | 130       | Toluene                | 0                      |
| 26                 | $\text{Re}(\text{CO})_5\text{Br}$    | 2.5/1                          | 130       | Toluene                | 0                      |
| 27                 | $\text{MnCO}_5\text{Br}$             | 2.5/1                          | 130       | Toluene                | 0                      |
| 28                 | $\text{Mn}_2(\text{CO})_{10}$        | 2.5/1                          | 130       | Toluene                | 0                      |
| 29                 | $\text{Co}(\text{acac})_2$           | 2.5/1                          | 130       | Toluene                | 0                      |
| 30                 | $\text{Pd}(\text{OAc})_2$            | 2.5/1                          | 130       | Toluene                | 0                      |
| 31                 | $\text{Rh}(\text{PPh}_3)_3\text{Cl}$ | 2.5/1                          | 130       | Toluene                | 0                      |
| 32                 | $\text{Cu}(\text{OAc})_2$            | 2.5/1                          | 130       | Toluene                | 0                      |

|    |                                    |       |     |         |   |
|----|------------------------------------|-------|-----|---------|---|
| 33 | Fe <sub>2</sub> (CO) <sub>9</sub>  | 2.5/1 | 130 | Toluene | 0 |
| 34 | Ru <sub>3</sub> (CO) <sub>12</sub> | 2.5/1 | 130 | Toluene | 7 |

<sup>a</sup> Reaction conditions unless otherwise noted: **1a** (0.2 mmol), **2i** (0.5 mmol), catalyst (0.01 mmol), solvent (2 mL), 150 °C, 24 h under N<sub>2</sub> atmosphere. <sup>b</sup> Yields determined by <sup>1</sup>H NMR analysis of the crude reaction mixture with 1,3,5-trimethoxybenzene as an internal standard. <sup>c</sup> 0.2 M. <sup>d</sup> 48 h. <sup>e</sup> NaOAc (20 mol%). <sup>f</sup> Et<sub>3</sub>N (20 mol%). <sup>g</sup> Na<sub>2</sub>CO<sub>3</sub> (20 mol%). <sup>h</sup> Isolated yield on 0.5 mmol scale, **1a** was recovered in 70% isolated yield. DCE = 1,2-dichloroethane, THF = tetrahydrofuran.

Of note, no bis-C-H functionalized products such as **4ai** and **5ai** were detected during the entire screening process, which showcased the excellent chemoselectivity in this reaction. As shown in Scheme S1, the reaction intermediate Re-complex **A** adopts an octahedron configuration, which is more sensitive to steric effect than those containing a tetrahedron configuration (such as Pd<sup>II</sup> systems). We propose that the selectivity origins from the bulky hindrance of the benzamide group in mono-aminocarbonylation products, which renders the second C-H aminocarbonylation rather difficult for Re<sub>2</sub>(CO)<sub>10</sub> catalyst.

The reaction of azobenzene with *ortho*-substituted isocyanate gave benzamide **3ak** in low yield under standard condition (Table S2, entry 1). A higher concentration provided **3ak** in 64% yield (entry 2). Introduction of a catalytic amount of NaOAc as a base to the reaction gave **3ak** in 71% isolated yield and the reaction almost completed in 24 h (entry 3).

**Table S2.** Optimization of reaction with *o*-tolyl isocyanate<sup>a</sup>

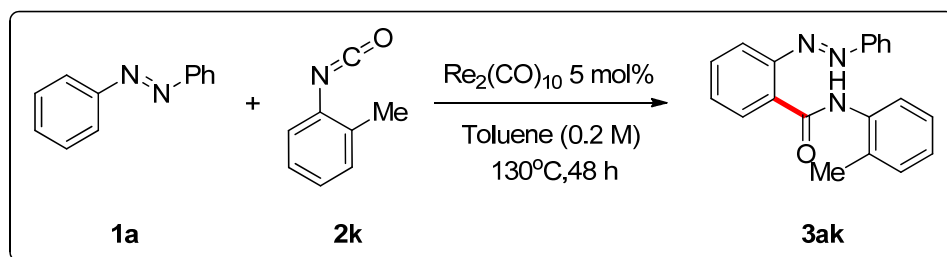

| Entry          | Base (eq.)  | <i>c</i> (M) | Yield ( <b>3ak</b> ,%) <sup>b</sup> |
|----------------|-------------|--------------|-------------------------------------|
| 1              | ---         | 0.2          | 25                                  |
| 2              | ---         | 0.4          | 64                                  |
| 3 <sup>c</sup> | NaOAc (0.2) | 0.2          | 73 (71)                             |

<sup>a</sup> Reaction conditions unless otherwise noted: **1a** (1.25 mmol), **2k** (0.5 mmol), catalyst

(0.01 mmol), solvent (2.5 mL), 130 °C, 48 h under N<sub>2</sub> atmosphere. <sup>b</sup> Yields determined by <sup>1</sup>H NMR analysis of the crude reaction mixture with 1,3,5-trimethoxybenzene as an internal standard. <sup>c</sup> 24 h.

#### 4.2. Typical procedure for C-H aminocarbonylation

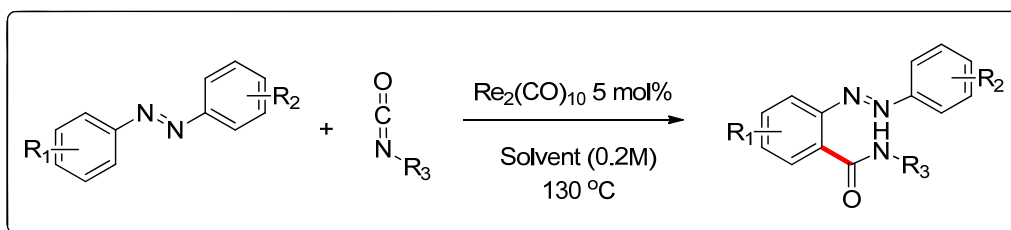

To an oven-dried Teflon-screw-capped tube equipped with a magnetic stir bar were added Re<sub>2</sub>(CO)<sub>10</sub> (0.025 mmol, 5 mol %), azobenzene (1.25 mmol), isocyanate (0.5 mmol), NaOAc (0.1 mmol, for substrates of low activity) and toluene (2.5 mL) sequentially under nitrogen. The closed tube was put into a pre-heated oil bath at 130 °C and stirred for 48 h or 24 h. After completion of the reaction, the resulting mixture was cooled down to room temperature, dilute with ethyl acetate (5 mL), filtered through a short pad of silica gel and washed with ethyl acetate (30 mL). The filtrate was pre-absorbed on silica gel and concentrated under vacuum. Flash chromatographic purification of residue provided the pure *o*-azobenzamides (petroleum ether:ethyl acetate=10:1).

### 4.3. Characterization of *o*-azobenzamides

#### (*E*)-*N*-phenyl-2-(phenyldiazenyl)benzamide (3aa)

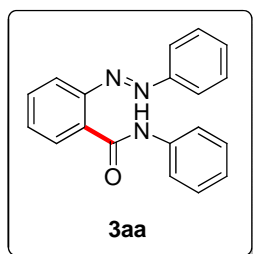

According to general procedure:  $\text{Re}_2(\text{CO})_{10}$  (0.025 mmol, 5 mol %), (*E*)-1,2-diphenyldiazene (1.25 mmol), phenyl isocyanate (0.5 mmol) in toluene (2.5 mL) were stirred at 130 °C for 48 h. After workup, column chromatography (PE:EA = 10:1) afford the title compound as orange solid in 66 % yield.

**m.p.:** 121-122 °C

**$^1\text{H}$  NMR ( $\text{CDCl}_3$ , 400 MHz)  $\delta$**  10.71 (s, 1H), 8.43 (dd,  $J_1 = 8.0$  Hz,  $J_2 = 2.0$  Hz, 1H), 7.87 – 7.85 (m, 2H), 7.79 (dd,  $J_1 = 8.0$  Hz,  $J_2 = 1.6$  Hz, 1H), 7.67 (d,  $J = 7.6$  Hz, 2H), 7.60 – 7.51 (m, 5H), 7.32 (t,  $J = 7.6$  Hz, 2H), 7.10 (t,  $J = 7.2$  Hz, 1H).

**$^{13}\text{C}$  NMR ( $\text{CDCl}_3$ , 101 MHz)  $\delta$**  163.6, 152.6, 149.2, 138.5, 132.3, 132.1, 131.9, 131.5, 129.5, 129.1, 124.1, 123.1, 120.2, 115.9.

**HRMS (ESI-MS):** calculated for  $\text{C}_{19}\text{H}_{15}\text{ON}_3\text{Na}$  ( $[\text{M}+\text{Na}]^+$ ): 324.11073, found: 324.11078.

#### (*E*)-2-(phenyldiazenyl)-*N*-(*p*-tolyl)benzamide (3ab)

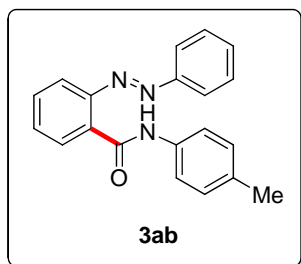

According to general procedure:  $\text{Re}_2(\text{CO})_{10}$  (0.025 mmol, 5 mol %), (*E*)-1,2-diphenyldiazene (1.25 mmol), 4-methylphenyl isocyanate (0.5 mmol) in toluene (2.5 mL) were stirred at 130 °C for 48 h. After workup, column chromatography (PE:EA = 10:1) afford the title compound

as orange solid in 63 % yield.

**m.p.:** 144-145 °C

**$^1\text{H}$  NMR ( $\text{CDCl}_3$ , 400 MHz)  $\delta$**  10.63 (s, 1H), 8.42 (dd,  $J_1 = 7.6$  Hz,  $J_2 = 1.6$  Hz, 1H), 7.86 – 7.84 (m, 2H), 7.77 (dd,  $J_1 = 7.6$  Hz,  $J_2 = 1.6$  Hz, 1H), 7.59 – 7.50 (m, 7H), 7.12 (d,  $J = 8.4$  Hz, 2H), 2.30 (s, 3H).

**$^{13}\text{C}$  NMR ( $\text{CDCl}_3$ , 101 MHz)  $\delta$**  163.5, 152.7, 149.2, 136.0, 133.9, 132.4, 132.0, 131.9, 131.7, 129.6, 129.6, 123.2, 120.2, 115.9, 21.0.

**HRMS (ESI-MS):** calculated for C<sub>20</sub>H<sub>17</sub>ON<sub>3</sub>Na ([M+Na]<sup>+</sup>): 338.12611, found: 338.12619.

**(E)-2-(phenyldiazenyl)-N-(4-biphenyl)benzamide (3ac)**

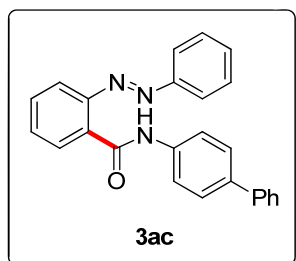

According to method A: Re<sub>2</sub>(CO)<sub>10</sub> (0.025 mmol, 5 mol %), (E)-1,2-diphenyldiazene (1.25 mmol), 4-biphenyl isocyanate (0.5 mmol) in toluene (2.5 mL) were stirred at 130 °C for 48 h. After workup, column chromatography (PE:EA = 10:1) afford the title compound as orange solid in 66 % yield.

**m.p.:** 184-185 °C

**<sup>1</sup>H NMR (CDCl<sub>3</sub>, 400 MHz) δ** 10.80 (s, 1H), 8.45 (d, *J* = 7.6 Hz, 1H), 7.88 – 7.86 (m, 2H), 7.80 (d, *J* = 8.0 Hz, 1H), 7.74 (d, *J* = 8.0 Hz, 2H), 7.60 – 7.52 (m, 9H), 7.40 (t, *J* = 7.6 Hz, 2H), 7.30 (t, 7.2 Hz, 1H).

**<sup>13</sup>C NMR (CDCl<sub>3</sub>, 101 MHz) δ** 163.6, 152.7, 149.3, 140.6, 137.9, 137.1, 132.5, 132.2, 131.9, 131.6, 129.7, 128.8, 127.7, 127.1, 126.9, 123.2, 120.5, 116.0.

**HRMS (ESI-MS):** calculated for C<sub>25</sub>H<sub>19</sub>ON<sub>3</sub>Na ([M+Na]<sup>+</sup>): 400.14203, found: 400.14186.

**(E)-2-(phenyldiazenyl)-N-(4-methoxyphenyl)benzamide (3ad)**

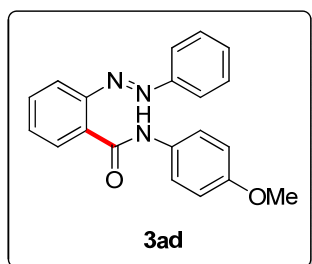

According to method B: Re<sub>2</sub>(CO)<sub>10</sub> (0.025 mmol, 5 mol %), (E)-1,2-diphenyldiazene (1.25 mmol), 4-methoxyphenyl isocyanate (0.5 mmol) NaOAc (0.1 mmol), in toluene (2.5 mL) were stirred at 130 °C for 48 h. After workup, column chromatography (PE:EA = 10:1) afford the title compound

as orange solid in 42 % yield.

**m.p.:** 182-183 °C

**<sup>1</sup>H NMR (CDCl<sub>3</sub>, 400 MHz) δ** 10.63 (s, 1H), 8.46 (dd, *J*<sub>1</sub> = 7.8 Hz, *J*<sub>2</sub> = 1.6 Hz, 1H), 7.90 - 7.87 (m, 2H), 7.82 (dd, *J*<sub>1</sub> = 7.8 Hz, *J*<sub>2</sub> = 1.2 Hz, 1H), 7.61 - 7.55 (m, 7H), 6.88 (d, *J* = 9.2 Hz, 2H), 3.80 (s, 3H).

$^{13}\text{C}$  NMR ( $\text{CDCl}_3$ , 101 MHz)  $\delta$  163.4, 156.5, 152.7, 149.3, 132.4, 132.0, 132.0, 131.9, 131.8, 131.7, 129.7, 123.2, 121.8, 116.0, 114.3, 55.6.

**HRMS (ESI-MS):** calculated for  $\text{C}_{20}\text{H}_{17}\text{O}_2\text{N}_3\text{Na}$  ( $[\text{M}+\text{Na}]^+$ ): 354.12130, found: 354.12128.

**(E)-2-(phenyldiazenyl)-N-(4-trifluoromethoxyphenyl)benzamide (3ae)**

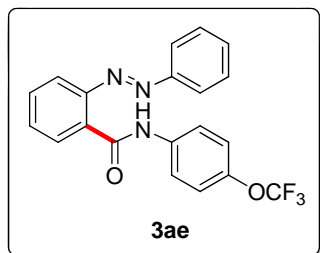

According to general procedure:  $\text{Re}_2(\text{CO})_{10}$  (0.025 mmol, 5 mol %), (*E*)-1,2-diphenyldiazene (1.25 mmol), 4-trifluoromethoxyphenyl isocyanate (0.5 mmol), NaOAc (0.1 mmol) in toluene (2.5 mL) were stirred at 130 °C for 48 h. After workup, column chromatography (PE:EA =

10:1) afford the title compound as orange solid in 63 % yield.

**m.p.:** 159-160 °C

$^1\text{H}$  NMR ( $\text{CDCl}_3$ , 400 MHz)  $\delta$  10.86 (s, 1H), 8.43 (d,  $J = 7.2$  Hz, 1H), 7.87 - 7.80 (m, 3H), 7.68 (d,  $J = 8.8$  Hz, 2H), 7.62 - 7.55 (m, 5H), 7.17 (d,  $J = 8.4$  Hz, 2H).

$^{13}\text{C}$  NMR ( $\text{CDCl}_3$ , 101 MHz)  $\delta$  163.8, 152.7, 149.3, 145.3, 137.3, 132.6, 132.4, 132.0, 132.0, 131.2, 129.7, 123.1, 121.9, 121.3, 120.6 ( $^1J_{\text{C-F}} = 252.5$  Hz), 116.1.

$^{19}\text{F}$  NMR ( $\text{CDCl}_3$ , 565 MHz)  $\delta$  -58.0.

**HRMS (ESI-MS):** calculated for  $\text{C}_{20}\text{H}_{17}\text{O}_2\text{N}_3\text{F}_3\text{Na}$  ( $[\text{M}+\text{Na}]^+$ ): 408.09303, found: 408.09317.

**(E)-2-(phenyldiazenyl)-N-(4-trifluoromethylphenyl)benzamide (3af)**

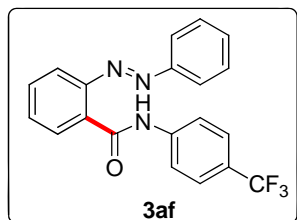

According to method A:  $\text{Re}_2(\text{CO})_{10}$  (0.025 mmol, 5 mol %), (*E*)-1,2-diphenyldiazene (1.25 mmol), 4-trifluoromethylphenyl isocyanate (0.5 mmol) in toluene (2.5 mL) were stirred at 130 °C for 48 h. After workup,

column chromatography (PE:EA = 10:1) afford the title compound as orange solid in 74 % yield.

**m.p.:** 155-156 °C



**<sup>1</sup>H NMR (CDCl<sub>3</sub>, 400 MHz) δ** 11.00 (s, 1H), 8.40 (dd,  $J_1 = 8.0$  Hz,  $J_2 = 2.0$  Hz, 1H), 7.86 – 7.84 (m, 3H), 7.76 (d,  $J = 8.4$  Hz, 2H), 7.61 – 7.55 (m, 7H).

**<sup>13</sup>C NMR (CDCl<sub>3</sub>, 101 MHz) δ** 164.0, 152.8, 149.3, 141.6, 132.7, 132.6, 132.0, 132.0, 131.0, 129.7, 126.4 (q,  $^3J_{C-F} = 4.1$  Hz), 125.9 (q,  $^2J_{C-F} = 32.6$  Hz), 124.5 (q,  $^1J_{C-F} = 271.6$  Hz), 123.1, 119.8, 116.1.

**<sup>19</sup>F NMR (CDCl<sub>3</sub>, 565 MHz) δ** -62.0.

**HRMS (ESI-MS):** calculated for C<sub>20</sub>H<sub>15</sub>ON<sub>3</sub>F<sub>3</sub> ([M+H]<sup>+</sup>): 370.11617, found: 370.11614.

### **(*E*)-2-(phenyldiazenyl)-*N*-(4-fluorophenyl)benzamide (3ag)**

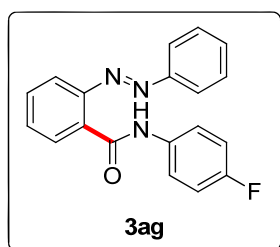

According to general procedure: Re<sub>2</sub>(CO)<sub>10</sub> (0.025 mmol, 5 mol %), (*E*)-1,2-diphenyldiazene (1.25 mmol), 4-fluorophenyl isocyanate (0.5 mmol), NaOAc (0.1 mmol) in toluene (2.5 mL) were stirred at 130 °C for 48 h. After workup, column chromatography (PE:EA = 10:1) afford the

title compound as orange solid in 70 % yield.

**m.p.:** 167-169 °C

**<sup>1</sup>H NMR (CDCl<sub>3</sub>, 400 MHz) δ** 10.78 (s, 1H), 8.43 (d,  $J = 8.0$  Hz, 1H), 7.87 - 7.80 (m, 3H), 7.64 - 7.56 (m, 7H), 7.02 (t,  $J = 8.8$  Hz, 2H).

**<sup>13</sup>C NMR (CDCl<sub>3</sub>, 101 MHz) δ** 163.6, 159.1 (d,  $^1J_{C-F} = 245.5$  Hz), 152.6, 149.2, 134.6 (d,  $^4J_{C-F} = 2.8$  Hz), 132.5, 132.2, 132.0, 131.9, 131.3, 129.7, 123.1, 121.8, (d,  $^3J_{C-F} = 7.8$  Hz), 116.0, 115.7 (d,  $^2J_{C-F} = 22.5$  Hz).

**<sup>19</sup>F NMR (CDCl<sub>3</sub>, 565 MHz) δ** -118.0.

**HRMS (ESI-MS):** calculated for C<sub>19</sub>H<sub>14</sub>ON<sub>3</sub>FNa ([M+Na]<sup>+</sup>) 342.10131, found 342.10126.

### **(*E*)-2-(phenyldiazenyl)-*N*-(4-chlorophenyl)benzamide (3ah)**

According to method A: Re<sub>2</sub>(CO)<sub>10</sub> (0.025 mmol, 5 mol %), (*E*)-1,2-diphenyldiazene (1.25 mmol), 4-chlorophenyl isocyanate (0.5 mmol) in toluene (2.5 mL) were stirred

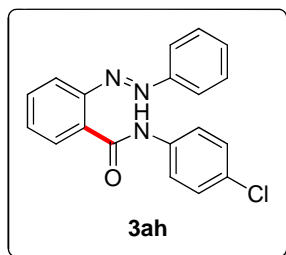

at 130 °C for 48 h. After workup, column chromatography (PE:EA = 10:1) afford the title compound as orange solid in 86 % yield.

**m.p.:** 164-165 °C

**<sup>1</sup>H NMR (CDCl<sub>3</sub>, 400 MHz) δ** 10.83 (s, 1H), 8.43 (d, *J* = 7.2 Hz, 1H), 7.86 – 7.82 (m, 3H), 7.63 – 7.58 (m, 7H), 7.45 (d, *J* = 8.4 Hz, 2H).

**<sup>13</sup>C NMR (CDCl<sub>3</sub>, 101 MHz) δ** 163.6, 152.7, 149.2, 137.2, 132.5, 132.3, 132.0, 131.9, 131.2, 129.7, 129.2, 129.1, 123.1, 121.4, 116.0.

**HRMS (ESI-MS):** calculated for C<sub>19</sub>H<sub>14</sub>ON<sub>3</sub>ClNa ([M+Na]<sup>+</sup>): 358.07176, found: 358.07178.

**(*E*)-2-(phenyldiazenyl)-*N*-(4-bromophenyl)benzamide (3ai)**

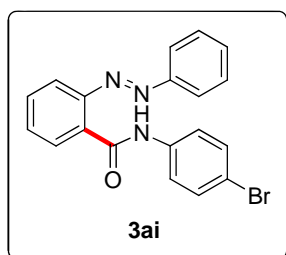

According to method A: Re<sub>2</sub>(CO)<sub>10</sub> (0.025 mmol, 5 mol %), (*E*)-1,2-diphenyldiazene (1.25 mmol), 4-bromophenyl isocyanate (0.5 mmol) in toluene (2.5 mL) were stirred at 130 °C for 48 h. After workup, column chromatography (PE:EA = 10:1) afford the title compound as orange solid in

75 % yield.

**m.p.:** 168-169 °C

**<sup>1</sup>H NMR (CDCl<sub>3</sub>, 400 MHz) δ** 10.82 (s, 1H), 8.42 (dd, *J*<sub>1</sub> = 8.0 Hz, *J*<sub>2</sub> = 2.0 Hz, 1H), 7.87 – 7.81 (m, 3H), 7.61 – 7.55 (m, 7H), 7.42 (d, *J* = 8.8 Hz, 2H).

**<sup>13</sup>C NMR (CDCl<sub>3</sub>, 101 MHz) δ** 163.7, 152.7, 149.2, 137.7, 132.6, 132.4, 132.1, 132.0, 132.0, 131.2, 129.7, 123.1, 121.7, 116.8, 116.0.

**HRMS (ESI-MS):** calculated for C<sub>19</sub>H<sub>14</sub>ON<sub>3</sub>BrNa ([M+Na]<sup>+</sup>): 402.02125, found: 402.02136.

**(*E*)-2-(phenyldiazenyl)-*N*-(4-iodophenyl)benzamide (3aj)**

According to method A: Re<sub>2</sub>(CO)<sub>10</sub> (0.025 mmol, 5 mol %), (*E*)-1,2-diphenyldiazene (1.25 mmol), 4-iodophenyl isocyanate (0.5 mmol) in toluene (2.5 mL) were stirred at

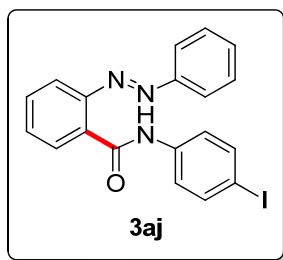

130 °C for 48 h. After workup, column chromatography (PE:EA = 10:1) afford the title compound as orange solid in 62 % yield.

**m.p.:** 177-178 °C

**<sup>1</sup>H NMR (CDCl<sub>3</sub>, 400 MHz) δ** 10.83 (s, 1H), 8.43 (d, *J* = 7.6 Hz, 1H), 7.87 – 7.84 (m, 3H), 7.63 – 7.58 (m, 7H), 7.45 (d, *J* = 8.4 Hz, 2H).

**<sup>13</sup>C NMR (CDCl<sub>3</sub>, 101 MHz) δ** 163.7, 152.7, 149.2, 138.3, 138.0, 132.6, 132.4, 132.0, 131.9, 131.2, 129.7, 123.1, 122.0, 116.0, 87.4.

**HRMS (ESI-MS):** calculated for C<sub>19</sub>H<sub>14</sub>ON<sub>3</sub>Na ([M+Na]<sup>+</sup>): 450.00738, found: 450.00735.

#### **(*E*)-2-(phenyldiazenyl)-*N*-(2-methylphenyl)benzamide (3ak)**

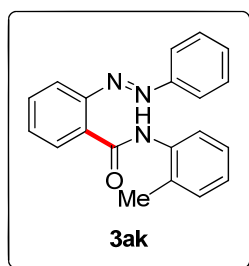

According to method B: Re<sub>2</sub>(CO)<sub>10</sub> (0.025 mmol, 5 mol %), (*E*)-1,2-diphenyldiazene (1.25 mmol), 2-methylphenyl isocyanate (0.5 mmol), NaOAc (0.1 mmol) in toluene (2.5 mL) were stirred at 130 °C for 48 h. After workup, column chromatography (PE:EA = 10:1) afford the title compound as

orange solid in 71 % yield.

**m.p.:** 122-123 °C

**<sup>1</sup>H NMR (CDCl<sub>3</sub>, 400 MHz) δ** 10.03 (s, 1H), 8.46 (dd, *J*<sub>1</sub> = 7.6 Hz, *J*<sub>2</sub> = 1.6 Hz, 1H), 7.94 (d, *J* = 8.0 Hz, 1H), 7.80 – 7.78 (m, 3H), 7.64 – 7.56 (m, 2H), 7.52 – 7.48 (m, 3H), 7.26 – 7.07 (m, 3H) 2.08 (s, 3H).

**<sup>13</sup>C NMR (CDCl<sub>3</sub>, 101 MHz) δ** 164.0, 152.7, 149.8, 136.2, 132.2, 132.1, 131.9, 131.7, 131.7, 130.5, 130.3, 129.5, 126.6, 125.4, 124.3, 123.1, 116.3, 18.1.

**HRMS (ESI-MS):** calculated for C<sub>20</sub>H<sub>17</sub>ON<sub>3</sub>Na ([M+Na]<sup>+</sup>): 338.12638, found: 338.12640.

#### **(*E*)-2-(phenyldiazenyl)-*N*-(2-chlorophenyl)benzamide (3al)**

According to method B: Re<sub>2</sub>(CO)<sub>10</sub> (0.025 mmol, 5 mol %), (*E*)-1,2-diphenyldiazene

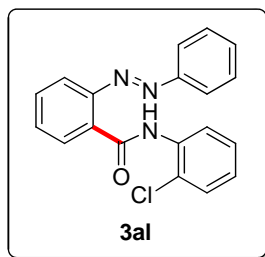

(1.25 mmol), 2-chlorophenyl isocyanate (0.5 mmol), NaOAc (0.1 mmol) in toluene (2.5 mL) were stirred at 130 °C for 48 h. After workup, column chromatography (PE:EA = 10:1) afford the title compound as orange solid in 80 % yield.

**m.p.:** 128-129 °C

**<sup>1</sup>H NMR (CDCl<sub>3</sub>, 400 MHz)** δ 10.39 (s, 1H), 8.50 (d, *J* = 8.0 Hz, 1H), 8.41 (d, *J* = 7.2 Hz, 1H), 7.87 – 7.84 (m, 2H), 7.77 – 7.52 (m, 1H), 7.59 – 7.57 (m, 2H), 7.48 – 4.46 (m, 3H), 7.34 – 7.28 (m, 2H), 7.03 (t, *J* = 7.2 Hz, 1H).

**<sup>13</sup>C NMR (CDCl<sub>3</sub>, 101 MHz)** δ 164.2, 152.4, 149.8, 135.3, 132.3, 132.2, 131.8, 131.5, 129.2, 129.1, 127.5, 125.0, 124.2, 123.6, 123.5, 116.5.

**HRMS (ESI-MS):** calculated for C<sub>19</sub>H<sub>14</sub>ON<sub>3</sub>ClNa ([M+Na]<sup>+</sup>): 358.07176, found: 358.07157.

#### **(*E*)-2-(phenyldiazenyl)-*N*-(*m*-tolylphenyl)benzamide (3am)**

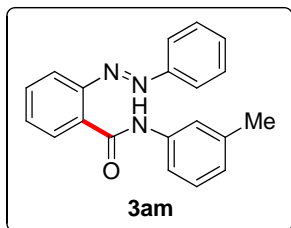

According to method B: Re<sub>2</sub>(CO)<sub>10</sub> (0.025 mmol, 5 mol %), (*E*)-1,2-Diphenyldiazene (1.25 mmol), *m*-tolyl isocyanate (0.5 mmol), NaOAc (0.1 mmol) in toluene (2.5 mL) were stirred at 130 °C for 48 h. After workup, column chromatography (PE:EA = 10:1) afford the title compound as orange solid in 63 % yield.

**m.p.:** 88-89 °C

**<sup>1</sup>H NMR (CDCl<sub>3</sub>, 400 MHz)** δ 10.6 (s, 1H), 8.44 (d, *J* = 8.0 Hz, 1H), 7.89 – 7.86 (m, 2H), 7.80 (d, *J* = 8.0 Hz, 1H), 7.60 – 7.54 (m, 6H), 7.46 (d, *J* = 8.4 Hz, 1H), 7.21 (t, *J* = 8.0 Hz, 1H), 6.92 (d, *J* = 7.2 Hz, 1H), 2.34 (s, 3H).

**<sup>13</sup>C NMR (CDCl<sub>3</sub>, 101 MHz)** δ 163.5, 152.7, 149.2, 138.9, 138.5, 132.4, 132.1, 131.9, 131.7, 129.6, 129.0, 125.1, 123.2, 120.9, 117.3, 115.9, 21.6.

**HRMS (ESI-MS):** calculated for C<sub>20</sub>H<sub>17</sub>ON<sub>3</sub>Na ([M+Na]<sup>+</sup>): 338.12638, found: 338.12625.

**(E)-2-(phenyldiazenyl)-N-(3,5-dimethylphenyl)benzamide (3an)**

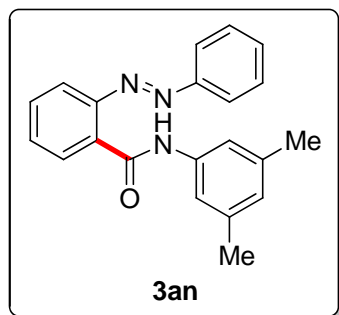

According to general procedure:  $\text{Re}_2(\text{CO})_{10}$  (0.025 mmol, 5 mol %), (*E*)-1,2-diphenyldiazene (1.25 mmol), 3,5-dimethylphenyl isocyanate (0.5 mmol), NaOAc (0.1 mmol) in toluene (2.5 mL) were stirred at 130 °C for 48 h. After workup, column chromatography (PE:EA = 10:1) afford the title compound as orange solid in 70 % yield.

**m.p.:** 159-160 °C

**$^1\text{H}$  NMR ( $\text{CDCl}_3$ , 400 MHz)  $\delta$**  10.69 (s, 1H), 8.45 (d, (d,  $J = 8.0$  Hz, 1H), 7.90 - 7.88 (m, 2H), 7.81 (d,  $J = 8.0$  Hz, 1H), 7.62 - 7.53 (m, 5H), 7.33 (s, 2H), 6.75 (s, 1H), 2.29 (s, 6H).

**$^{13}\text{C}$  NMR ( $\text{CDCl}_3$ , 101 MHz)  $\delta$**  163.4, 152.7, 149.2, 138.8, 138.4, 132.4, 132.0, 132.0, 131.9, 131.7, 129.5, 126.0, 123.3, 118.0, 115.8, 21.5.

**HRMS (ESI-MS):** calculated for  $\text{C}_{21}\text{H}_{19}\text{ON}_3\text{Na}$  ( $[\text{M}+\text{Na}]^+$ ): 352.14203, found: 352.14194.

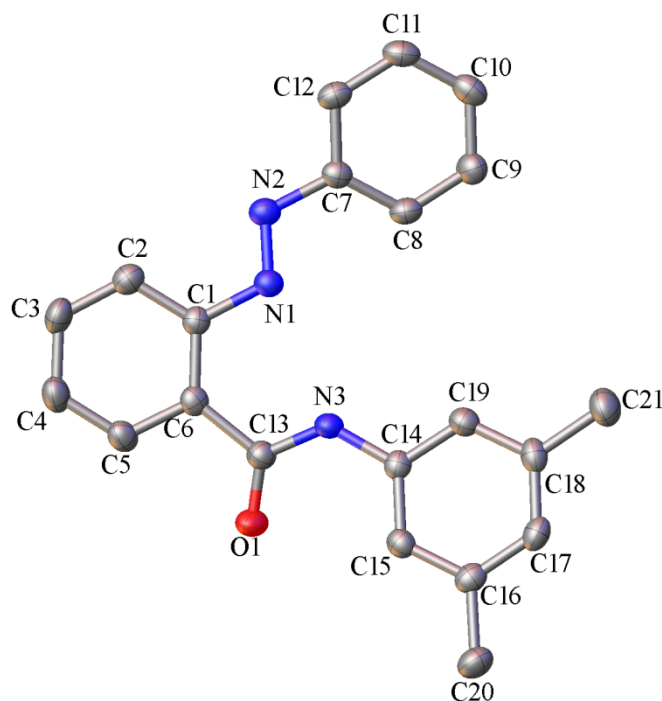

**Figure S1.** Molecular structures of **3an**, showing 30% probability ellipsoids and the partial atom-numbering scheme

**(E)-N-(naphthalen-2-yl)-2-(phenyldiazenyl)benzamide (3ao)**

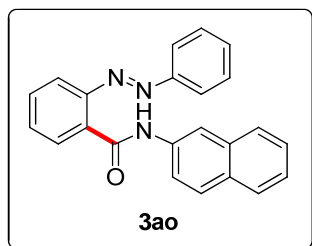

According to general procedure:  $\text{Re}_2(\text{CO})_{10}$  (0.025 mmol, 5 mol %), (*E*)-1,2-diphenyldiazene (1.25 mmol), naphthalen-2-yl isocyanate (0.5 mmol), NaOAc (0.1 mmol) in toluene (2.5 mL) were stirred at 130 °C for 48 h. After workup, column chromatography (PE:EA = 10:1) afford the title compound as orange solid in 67 % yield.

**m.p.:** 159-160 °C

**$^1\text{H}$  NMR ( $\text{CDCl}_3$ , 400 MHz)  $\delta$**  10.97 (s, 1H), 8.55 (dd,  $J_1 = 7.6$  Hz,  $J_2 = 1.2$  Hz, 1H), 8.27 (d,  $J = 7.6$  Hz, 1H), 7.83 - 7.78 (m, 4H), 7.71 - 7.58 (m, 4H), 7.53 - 7.44 (m, 2H), 7.41 - 7.36 (m, 3H), 7.08 (t,  $J = 7.6$  Hz, 1H).

**$^{13}\text{C}$  NMR ( $\text{CDCl}_3$ , 101 MHz)  $\delta$**  164.3, 152.5, 149.9, 134.2, 133.3, 132.3, 132.3, 132.2, 131.9, 131.4, 129.5, 128.7, 127.1, 126.0, 125.9, 125.4, 123.5, 121.6, 120.6, 116.4.

**HRMS (ESI-MS):** calculated for  $\text{C}_{23}\text{H}_{17}\text{ON}_3\text{Na}$  ( $[\text{M}+\text{Na}]^+$ ) 374.12638, found 374.12616.

**(E)-N-butyl-2-(phenyldiazenyl)benzamide (3ap)**

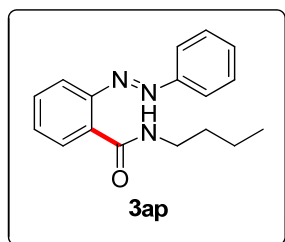

According to general procedure:  $\text{Re}_2(\text{CO})_{10}$  (0.025 mmol, 5 mol %), (*E*)-1,2-diphenyldiazene (1.25 mmol), *n*-butyl isocyanate (0.5 mmol), NaOAc (0.1 mmol) in toluene (2.5 mL) were stirred at 130 °C for 48 h. After workup, column chromatography (PE:EA = 10:1) afford the title compound as orange solid in 55 % yield.

**m.p.:** 105-106 °C

**$^1\text{H}$  NMR ( $\text{CDCl}_3$ , 400 MHz)  $\delta$**  8.45 (s, 1H), 8.34 (dd,  $J_1 = 8.0$  Hz,  $J_2 = 1.6$  Hz, 1H), 7.84 - 7.81 (m, 2H), 7.75 (dd,  $J_1 = 7.6$  Hz,  $J_2 = 1.2$  Hz, 1H), 7.58 - 7.49 (m, 5H), 3.52 (q,  $J = 6.8$  Hz, 2H), 1.64 - 1.57 (m, 2H), 1.43 - 1.34 (m, 2H), 0.91 (t,  $J = 7.2$  Hz, 3H).

**$^{13}\text{C}$  NMR ( $\text{CDCl}_3$ , 101 MHz)  $\delta$**  165.8, 152.6, 149.6, 132.1, 131.8, 131.6, 131.6,

129.5, 123.2, 115.8, 40.0, 31.8, 20.4, 13.8.

**HRMS (ESI-MS):** calculated for  $C_{17}H_{19}ON_3Na$  ( $[M+Na]^+$ ) 304.14203, found 304.14195.

**(E)-2-(phenyldiazenyl)-N-cyclopentylbenzamide (3aq)**

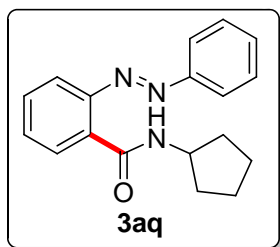

According to general procedure:  $Re_2(CO)_{10}$  (0.025 mmol, 5 mol %), (E)-1,2-diphenyldiazene (1.25 mmol), cyclopentyl isocyanate (0.5 mmol), NaOAc (0.1 mmol) in toluene (2.5 mL) were stirred at 130 °C for 48 h. After workup, column chromatography (PE:EA = 10:1) afford the title compound as

sticky oil in 55 % yield.

**m.p.:** 114-115 °C

**$^1H$  NMR ( $CDCl_3$ , 400 MHz)  $\delta$**  8.50 (d,  $J = 4.8$  Hz, 1H), 8.37 (dd,  $J_1 = 8.0$  Hz,  $J_2 = 1.6$  Hz, 1H), 7.85 - 7.82 (m, 2H), 7.75 (dd,  $J_1 = 7.6$  Hz,  $J_2 = 1.6$  Hz, 1H), 7.60 - 7.50 (m, 5H), 4.52 - 4.43 (m, 1H), 2.13 - 2.05 (m, 2H), 1.70 - 1.61 (m, 4H), 1.56 - 1.50 (m, 2H).

**$^{13}C$  NMR ( $CDCl_3$ , 101 MHz)  $\delta$**  165.3, 152.7, 149.6, 132.2, 131.8, 131.6, 131.6, 131.5, 129.5, 123.1, 115.8, 51.9, 33.4, 24.0.

**HRMS (MALDI-MS):** calculated for  $C_{18}H_{19}N_3NaO$  ( $[M+Na]^+$ ) 316.14203, found 316.14228.

**(E)-2-(phenyldiazenyl)-N-benzylbenzamide (3ar)**

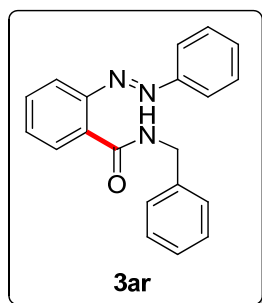

According to general procedure:  $Re_2(CO)_{10}$  (0.025 mmol, 5 mol %), (E)-1,2-diphenyldiazene (1.25 mmol), benzyl isocyanate (0.5 mmol), NaOAc (0.1 mmol) in toluene (2.5 mL) were stirred at 130 °C for 48 h. After workup, column chromatography (PE:EA = 10:1) afford the title compound as sticky oil in 57 % yield.

**m.p.:** 116-117 °C

**<sup>1</sup>H NMR (CDCl<sub>3</sub>, 400 MHz)** δ 8.92 (s, 1H), 8.39 (d, *J* = 7.6 Hz, 1H), 7.75 (d, *J* = 7.6 Hz, 1H), 7.56 - 7.27 (m, 12 H), 4.67 (d, *J* = 5.2 Hz, 2H).

**<sup>13</sup>C NMR (CDCl<sub>3</sub>, 101 MHz)** δ 165.6, 152.2, 149.5, 138.2, 132.0, 131.8, 131.7, 131.6, 131.3, 129.4, 128.9, 128.5, 127.7, 123.2, 115.8, 44.8.

**HRMS (ESI-MS):** calculated for C<sub>20</sub>H<sub>17</sub>ON<sub>3</sub>Na ([M+Na]<sup>+</sup>) 338.12638, found 338.12631.

**(*E*)-5-methyl-2-(*p*-tolyl diazenyl)-*N*-(4-chlorophenyl)benzamide (3bh)**

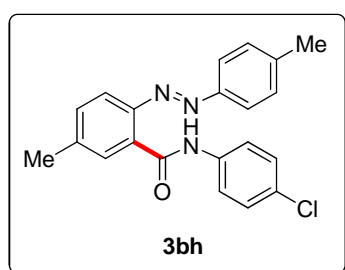

According to general procedure: Re<sub>2</sub>(CO)<sub>10</sub> (0.025 mmol, 5 mol %), (*E*)-1,2-di-*p*-tolylphenyldiazene (1.25 mmol), 4-chlorophenyl isocyanate (0.5 mmol), NaOAc (0.1 mmol) in toluene (2.5 mL) were stirred at 130 °C for 24 h. After workup, column chromatography (PE:EA =

10:1) afford the title compound as orange solid in 78 % yield.

**m.p.:** 175-176 °C

**<sup>1</sup>H NMR (CDCl<sub>3</sub>, 400 MHz)** δ 11.02, (s, 1H), 8.25 (d, *J* = 1.6 Hz, 1H), 7.76 - 7.74 (m, 3H), 7.65 - 7.62 (m, 2H), 7.36 (d, *J* = 8.4 Hz, 3H), 7.31 - 7.29 (m, 2H), 2.47 (s, 6H).

**<sup>13</sup>C NMR (CDCl<sub>3</sub>, 101 MHz)** δ 163.9, 150.9, 147.5, 143.3, 142.6, 137.3, 133.1, 132.3, 130.6, 130.4, 129.2, 129.1, 123.1, 121.4, 116.0, 21.8, 21.7.

**HRMS (MALDI-MS):** calculated for C<sub>21</sub>H<sub>18</sub>ClN<sub>3</sub>NaO ([M+Na]<sup>+</sup>) 386.10306, found 386.10323.

**(*E*)-5-(*tert*-butyl)-2-((4-(*tert*-butyl)phenyl) diazenyl)-*N*-(4-chlorophenyl) benzamide (3ch)**

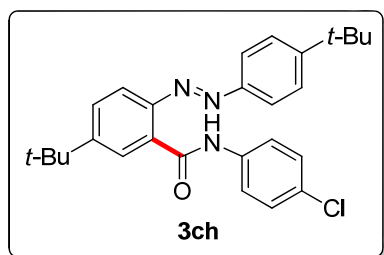

According to general procedure: Re<sub>2</sub>(CO)<sub>10</sub> (0.025 mmol, 5 mol %), (*E*)-1,2-bis(*tert*-butyl) phenyldiazene (1.25 mmol), 4-chlorophenyl isocyanate (0.5 mmol), NaOAc (0.1 mmol) in toluene (2.5 mL) were stirred at 130 °C for 24 h. After



workup, column chromatography (PE:EA = 10:1) afford the title compound as orange solid in 85 % yield.

**m.p.:** 181-182 °C

**<sup>1</sup>H NMR (CDCl<sub>3</sub>, 400 MHz) δ** 11.03, (s, 1H), 8.50 (d, *J* = 1.2 Hz, 1H), 7.81 - 7.76 (m, 3H), 7.67 (d, *J* = 8.8 Hz, 2H), 7.60 - 7.57 (m, 3H), 7.30 (d, *J* = 8.8 Hz, 2H), 1.39 (s, 18H).

**<sup>13</sup>C NMR (CDCl<sub>3</sub>, 101 MHz) δ** 164.1, 156.3, 155.4, 150.6, 147.4, 137.3, 130.4, 129.5, 129.1, 129.0, 128.7, 126.6, 122.9, 121.4, 115.9, 35.3, 35.3, 31.3, 31.2.

**HRMS (MALDI-MS):** calculated for C<sub>27</sub>H<sub>30</sub>ClN<sub>3</sub>NaO ([M+Na]<sup>+</sup>) 470.19696, found 470.19708.

**(*E*)-*N*-(4-chlorophenyl)-5-(methoxy)-2-((4-methoxyphenyl)diazenyl)benzamide**

**(3dh)**

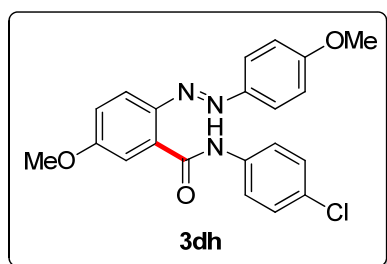

According to general procedure: Re<sub>2</sub>(CO)<sub>10</sub> (0.025 mmol, 5 mol %), (*E*)-1,2-bis(4-methoxy)phenyl diazene (1.25 mmol), 4-chlorophenyl isocyanate (0.5 mmol), NaOAc (0.1 mmol) in toluene (2.5 mL) were stirred at 130 °C for 24 h. After workup, column

chromatography (PE:EA = 10:1) afford the title compound as orange solid in 76 % yield.

**m.p.:** 172-173 °C

**<sup>1</sup>H NMR (CDCl<sub>3</sub>, 400 MHz) δ** 11.32 (s, 1H), 7.90 (s, 1H), 7.83 - 7.75 (m, 3H), 7.62 (d, *J* = 7.6 Hz, 2H), 7.29 (d, *J* = 7.6 Hz, 2H), 7.02 (s, 3H), 3.91 (s, 6H).

**<sup>13</sup>C NMR (CDCl<sub>3</sub>, 101 MHz) δ** 163.5, 162.8, 162.1, 146.9, 143.8, 137.3, 132.3, 129.1, 124.9, 121.4, 119.4, 118.0, 114.8, 114.5, 55.9, 55.8.

**HRMS (MALDI-MS):** calculated for C<sub>21</sub>H<sub>18</sub>ClN<sub>3</sub>NaO<sub>3</sub> ([M+Na]<sup>+</sup>) 418.09289, found 418.09292.

**(*E*)-*N*-(4-chlorophenyl)-5-(trifluoromethoxy)-2-((4-(trifluoromethoxy)phenyl)diaz**

### enyl)benzamide (3eh)

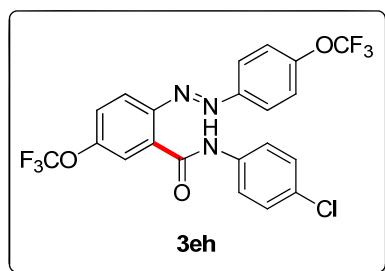

According to general procedure:  $\text{Re}_2(\text{CO})_{10}$  (0.025 mmol, 5 mol %), (*E*)-1,2-bis(4-trifluoromethoxy)phenyldiazene (1.25 mmol), 4-chlorophenyl isocyanate (0.5 mmol), NaOAc (0.1 mmol) in toluene (2.5 mL) were stirred at 130 °C for 24 h. After

workup, column chromatography (PE:EA = 10:1) afford the title compound as orange solid in 52 % yield.

**m.p.:** 140-141 °C

**$^1\text{H}$  NMR ( $\text{CDCl}_3$ , 400 MHz)  $\delta$**  10.53 (s, 1H), 8.21 (s, 1H), 7.91 - 7.86 (m, 3H), 7.54 (d,  $J$  = 8.4 Hz, 2H), 7.43 (d,  $J$  = 8.4 Hz, 2H), 7.38 (d,  $J$  = 9.2 Hz, 1H), 7.26 (d,  $J$  = 8.0 Hz, 2H).

**$^{13}\text{C}$  NMR ( $\text{CDCl}_3$ , 101 MHz)  $\delta$**  162.1, 152.3 (q,  $^3J_{\text{C-F}}$  = 2.1 Hz), 152.0 (q,  $^3J_{\text{C-F}}$  = 2.1 Hz), 147.0, 136.6, 133.6, 129.8, 129.3, 124.9, 124.6, 124.1, 123.4, 121.7, 121.4, 120.5 (q,  $^1J_{\text{C-F}}$  = 257.6 Hz), 120.4 (q,  $^1J_{\text{C-F}}$  = 257.6 Hz), 118.4.

**$^{19}\text{F}$  NMR ( $\text{CDCl}_3$ , 565 MHz)  $\delta$**  -57.6, -57.6.

**HRMS (MALDI-MS):** calculated for  $\text{C}_{21}\text{H}_{12}\text{ClF}_6\text{N}_3\text{NaO}_3$  ( $[\text{M}+\text{Na}]^+$ ) 526.03636, found 526.03634.

### (*E*)-*N*-(4-chlorophenyl)-5-(trifluoromethyl)-2-((4-(trifluoromethyl)phenyl)diazene)benzamide (3fh)

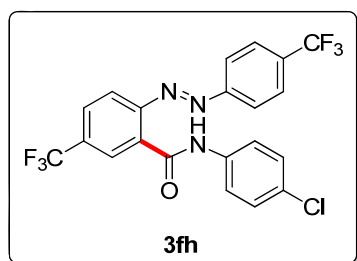

According to general procedure:  $\text{Re}_2(\text{CO})_{10}$  (0.025 mmol, 5 mol %), (*E*)-1,2-bis(4-trifluoromethyl)phenyldiazene (1.25 mmol), 4-chlorophenyl isocyanate (0.5 mmol), NaOAc (0.1 mmol) in toluene (2.5 mL) were stirred at 130 °C for 24 h. After workup, column

chromatography (PE:EA = 10:1) afford the title compound as orange solid in 46 % yield.

**m.p.:** 175-176 °C

**<sup>1</sup>H NMR (CDCl<sub>3</sub>, 400 MHz) δ** 10.30 (s, 1H), 8.68 (s, 1H), 8.01 - 7.83 (m, 7H), 7.56 (d, *J* = 8.4 Hz, 2H), 7.31 (d, *J* = 8.4 Hz, 2H).

**<sup>13</sup>C NMR (CDCl<sub>3</sub>, 101 MHz) δ** 162.2, 154.2, 150.5, 136.5, 134.5 (q, <sup>2</sup>*J*<sub>C-F</sub> = 32.9 Hz), 134.1 (q, <sup>2</sup>*J*<sub>C-F</sub> = 32.7 Hz), 132.6, 129.4, 129.1 (q, <sup>3</sup>*J*<sub>C-F</sub> = 3.3 Hz), 127.1 (q, <sup>3</sup>*J*<sub>C-F</sub> = 3.6 Hz), 123.6 (q, <sup>1</sup>*J*<sub>C-F</sub> = 273.5 Hz), 123.6, 123.4, (q, <sup>1</sup>*J*<sub>C-F</sub> = 274.1 Hz), 121.4, 117.2.

**<sup>19</sup>F NMR (CDCl<sub>3</sub>, 565 MHz) δ** -62.8, -63.0.

**HRMS (MALDI-MS):** calculated for C<sub>21</sub>H<sub>12</sub>ClF<sub>6</sub>N<sub>3</sub>NaO ([M+Na]<sup>+</sup>) 494.04653, found 494.04667.

**(*E*)-*N*-(4-chlorophenyl)-3-methyl-2-(*o*-tolyl diazenyl)benzamide (3gh)**

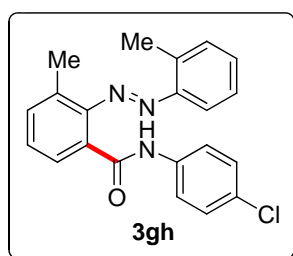

According to general procedure: Re<sub>2</sub>(CO)<sub>10</sub> (0.025 mmol, 5 mol %), (*E*)-1,2-bis(2-methyl)phenyldiazene (1.25 mmol), 4-chlorophenyl isocyanate (0.5 mmol), NaOAc (0.1 mmol) in toluene (2.5 mL) were stirred at 130 °C for 24 h. After workup, column chromatography (PE:EA = 10:1) afford the

title compound as orange solid in 57 % yield.

**m.p.:** 145-146 °C

**<sup>1</sup>H NMR (CDCl<sub>3</sub>, 400 MHz) δ** 8.90 (s, 1H), 7.53 - 7.49 (m, 2H), 7.39 (d, *J* = 8.8 Hz, 2H), 7.36 - 7.32 (m, 1H), 7.29 - 7.17 (m, 4H), 7.12 (d, *J* = 8.8 Hz, 2H), 2.47 (s, 3H), 2.44 (s, 3H).

**<sup>13</sup>C NMR (CDCl<sub>3</sub>, 101 MHz) δ** 166.7, 150.7, 149.2, 139.3, 137.1, 133.8, 133.6, 132.0, 131.7, 129.2, 128.8, 127.6, 126.4, 121.0, 115.1, 19.4, 17.7.

**HRMS (MALDI-MS):** calculated for C<sub>21</sub>H<sub>18</sub>ClN<sub>3</sub>NaO ([M+Na]<sup>+</sup>) 386.10306, found 386.10325.

**(*E*)-*N*-(4-chlorophenyl)-3-methoxy-2-(2-methoxyphenyl) diazenyl)benzamide (3hh)**

According to general procedure: Re<sub>2</sub>(CO)<sub>10</sub> (0.025 mmol, 5 mol %), (*E*)-1,2-bis(2-methoxy)phenyldiazene (1.25 mmol), 4-chlorophenyl isocyanate (0.5

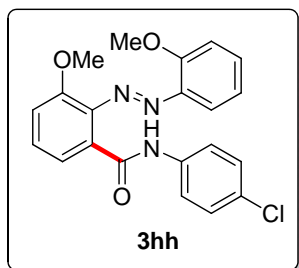

mmol), NaOAc (0.1 mmol) in toluene (2.5 mL) were stirred at 130 °C for 24 h. After workup, column chromatography (PE:EA = 10:1) afford the title compound as orange solid in 60 % yield.

**m.p.:** 162-163 °C

**<sup>1</sup>H NMR (CDCl<sub>3</sub>, 400 MHz)** δ 10.72 (s, 1H), 8.33 (d, *J* = 8.8 Hz, 1H), 7.59 (d, *J* = 8.4 Hz, 2H), 7.45 (d, *J* = 5.2 Hz, 2H), 7.33 (s, 1H), 7.27 - 7.24 (m, 3H), 7.10 - 7.08 (m, 2H), 3.87 (s, 3H), 3.83 (s, 3H).

**<sup>13</sup>C NMR (CDCl<sub>3</sub>, 101 MHz)** δ 163.4, 162.5, 160.7, 153.7, 150.3, 137.3, 133.6, 130.4, 129.0, 128.8, 124.2, 121.3, 118.9, 118.5, 116.7, 107.0, 99.5, 55.8, 55.6.

**HRMS (MALDI-MS):** calculated for C<sub>21</sub>H<sub>18</sub>ClN<sub>3</sub>NaO<sub>3</sub> ([M+Na]<sup>+</sup>) 418.09289, found 418.09299.

**(*E*)-*N*-(4-chlorophenyl)-2-((2,4-dimethylphenyl)diazenyl)-3,5-dimethylbenzamide (3ih)**

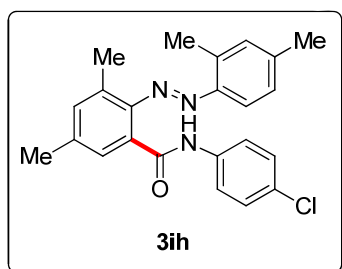

According to procedure: Re<sub>2</sub>(CO)<sub>10</sub> (0.025 mmol, 5 mol %), (*E*)-1,2-bis(2,4-dimethylphenyl)diazene (1.25 mmol), 4-chlorophenyl isocyanate (0.5 mmol), NaOAc (0.1 mmol) in toluene (2.5 mL) were stirred at 130 °C for 24 h. After workup, column chromatography (PE:EA

= 10:1) afford the title compound as orange solid in 53 % yield.

**m.p.:** 208-209 °C

**<sup>1</sup>H NMR (CDCl<sub>3</sub>, 400 MHz)** δ 9.13 (s, 1H), 7.54 - 7.46 (m, 4H), 7.19 - 7.02 (m, 5H), 2.47 (s, 6H), 2.36 (s, 3H), 2.32 (s, 3H).

**<sup>13</sup>C NMR (CDCl<sub>3</sub>, 101 MHz)** δ 166.4, 149.0, 147.2, 142.5, 139.6, 139.3, 137.2, 135.0, 132.6, 132.3, 129.6, 128.9, 128.8, 127.3, 121.0, 114.8, 21.5, 21.2, 20.1, 17.7.

**HRMS (MALDI-MS):** calculated for C<sub>23</sub>H<sub>22</sub>ClN<sub>3</sub>NaO ([M+Na]<sup>+</sup>) 414.13436, found 414.13445.

**(E)-N-(4-chlorophenyl)-2-((3,5-dimethylphenyl)diazenyl)-2,6-dimethylbenzamide (3jh)**

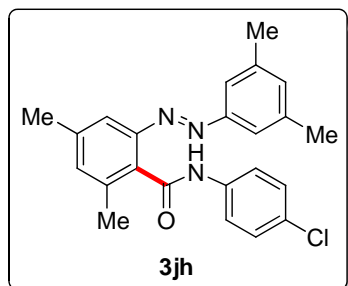

According to general procedure:  $\text{Re}_2(\text{CO})_{10}$  (0.025 mmol, 5 mol %), (*E*)-1,2-bis(2,4-dimethyl)phenyldiazene (1.25 mmol), 4-chlorophenyl isocyanate (0.5 mmol), NaOAc (0.1 mmol) in toluene (2.5 mL) were stirred at 130 °C for 24

h. After workup, column chromatography (PE:EA = 10:1) afford the title compound as orange solid in 73 % yield.

**m.p.:** 201-202 °C

**$^1\text{H}$  NMR (CDCl<sub>3</sub>, 400 MHz)  $\delta$**  7.79 (s, 1H), 7.56 (dd,  $J_1 = 7.2$  Hz,  $J_2 = 1.6$  Hz, 2H), 7.40 (s, 1H), 7.37 (s, 2H), 7.29 (dd,  $J_1 = 6.8$  Hz,  $J_2 = 2.0$  Hz, 2H), 7.12 (s, 1H), 7.07 (s, 1H), 2.45 (s, 3H), 2.37 (s, 3H), 2.29 (s, 6H).

**$^{13}\text{C}$  NMR (CDCl<sub>3</sub>, 101 MHz)  $\delta$**  167.2, 152.7, 149.2, 140.2, 138.9, 137.1, 136.8, 134.0, 133.7, 133.3, 129.5, 129.1, 121.5, 121.1, 114.0, 21.5, 21.3, 19.3.

**HRMS (MALDI-MS):** calculated for C<sub>23</sub>H<sub>22</sub>ClN<sub>3</sub>NaO ([M+Na]<sup>+</sup>) 414.13436, found 414.13441.

**(E)-N-(4-chlorophenyl)-4-methyl-2-(m-tolyldiazenyl)benzamide (3kh) and (E)-N-(4-chlorophenyl)-6-methyl-2-(m-tolyldiazenyl)benzamide (3kh')**

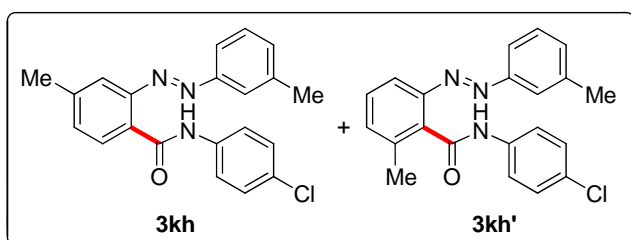

According to general procedure:  $\text{Re}_2(\text{CO})_{10}$  (0.025 mmol, 5 mol %), (*E*)-1,2-bis(2-methyl)phenyldiazene (1.25 mmol), 4-chlorophenyl isocyanate (0.5 mmol), NaOAc

(0.1 mmol) in toluene (2.5 mL) were stirred at 130 °C for 24 h. The ratio of **3kh** and **3kh'** was determined by GC-MS to be 50:1. After workup, column chromatography (PE:EA = 10:1) afford the title compound as orange solid in 93 % yield..

**Data for major product 3kh**

**m.p.:** 155-156 °C

**<sup>1</sup>H NMR (CDCl<sub>3</sub>, 400 MHz) δ** 10.89 (s, 1H), 8.25 (d, *J* = 8.0 Hz, 1H), 7.64 - 7.54 (m, 5H), 7.41 (t, *J* = 7.6 Hz, 1H), 7.33 (d, *J* = 8.0 Hz, 2H), 7.22 (d, *J* = 8.0 Hz, 2H), 2.42 (s, 3H), 2.39 (s, 3H).

**<sup>13</sup>C NMR (CDCl<sub>3</sub>, 101 MHz) δ** 163.5, 152.6, 148.8, 143.0, 139.6, 137.3, 133.2, 132.7, 131.9, 129.4, 128.9, 128.7, 128.4, 122.5, 121.4, 121.1, 115.9, 21.5, 21.4.

**HRMS (MALDI-MS):** calculated for C<sub>21</sub>H<sub>18</sub>ClN<sub>3</sub>NaO ([M+Na]<sup>+</sup>) 386.10306, found 386.10307

**(*E*)-*N*-(4-chlorophenyl)-2-(mesityldiazenyl)benzamide (3lh)**

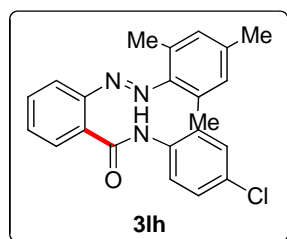

According to method A: Re<sub>2</sub>(CO)<sub>10</sub> (0.025 mmol, 5 mol %), (*E*)-1-(2,4,6-trimethylphenyl)-2-phenyldiazene (1.25 mmol), 4-chlorophenyl isocyanate (0.5 mmol), NaOAc (0.1 mmol) in toluene (2.5 mL) were stirred at 130 °C for 24 h. After

workup, column chromatography (PE:EA = 10:1) afford the title compound as orange solid in 84 % yield.

**m.p.:** 126-127 °C

**<sup>1</sup>H NMR (CDCl<sub>3</sub>, 400 MHz) δ** 10.70 (s, 1H), 8.33 - 8.31 (m, 1H), 7.75 - 7.74 (m, 1H), 7.53 - 7.47 (m, 4H), 7.19 (d, *J* = 8.0 Hz, 2H), 6.95 (s, 2H), 2.35 (s, 6H), 2.33 (s, 3H).

**<sup>13</sup>C NMR (CDCl<sub>3</sub>, 101 MHz) δ** 163.9, 149.3, 149.1, 140.3, 137.1, 132.0, 131.6, 131.4, 131.3, 130.3, 128.9, 128.9, 121.3, 115.4, 21.2, 19.1.

**HRMS (MALDI-MS):** calculated for C<sub>22</sub>H<sub>20</sub>ClN<sub>3</sub>NaO ([M+Na]<sup>+</sup>) 400.11871, found 400.11878.

**(*E*)-*N*-(4-chlorophenyl)-2-((3,5-dimethylphenyl)diazenyl)benzamide (3mh)**

According to method A: Re<sub>2</sub>(CO)<sub>10</sub> (0.025 mmol, 5 mol %), (*E*)-1-(3,5-dimethylphenyl)-2-phenyldiazene (1.25 mmol), 4-chlorophenyl isocyanate (0.5 mmol), NaOAc (0.1 mmol) in toluene (2.5 mL) were stirred at 130 °C for 24 h.

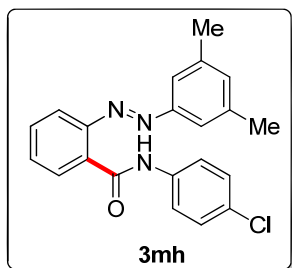

After workup, column chromatography (PE:EA = 10:1) afford the title compound as orange solid in 70 % yield.

**3md** was isolated as a single product.

**m.p.:** 116-117 °C

**<sup>1</sup>H NMR (CDCl<sub>3</sub>, 400 MHz) δ** 11.04 (s, 1H), 8.41 (dd,  $J_1 = 7.6$  Hz,  $J_2 = 1.6$  Hz, 1H), 7.77 (d,  $J_1 = 7.6$  Hz,  $J_2 = 1.2$  Hz, 1H), 7.64 (d,  $J = 8.8$  Hz, 2H), 7.58 – 7.50 (m, 2H), 7.44 (s, 2H), 7.25 (d,  $J = 8.8$  Hz, 2H), 7.17 (s, 1H), 2.39 (s, 3H).

**<sup>13</sup>C NMR (CDCl<sub>3</sub>, 101 MHz) δ** 163.5, 152.8, 149.0, 139.4, 137.3, 134.3, 132.3, 131.9, 131.8, 130.9, 129.0, 129.0, 121.2, 121.0, 115.7, 21.3.

**HRMS (MALDI-MS):** calculated for C<sub>21</sub>H<sub>18</sub>ClN<sub>3</sub>NaO ([M+Na]<sup>+</sup>) 386.10306, found 386.10304.

## 5. Mechanistic studies

### 5.1 Probe the possible reaction intermediate

To probe the possible reaction intermediate, a series of reactions were carried out. First, we examined the stoichiometric reaction of  $\text{Re}_2(\text{CO})_{10}$  with azobenzene **1a**. It was shown that  $\text{Re}_2(\text{CO})_{10}$  reacted smoothly with azobenzene **1a** affording five-member rhenacycle **A** in 6% isolated yield (Scheme S1).

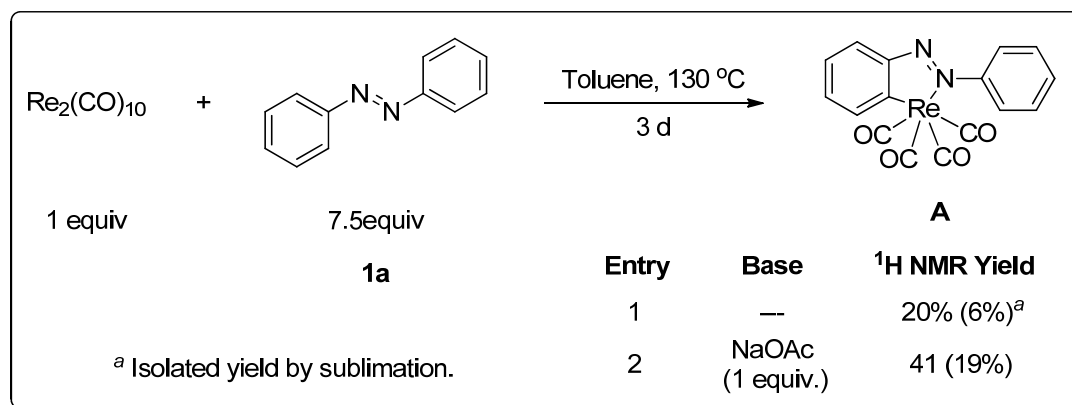

**Scheme S1.** Stoichiometric reaction of  $\text{Re}_2(\text{CO})_{10}$  with azobenzene **1a**

#### Experimental procedure:

$\text{Re}_2(\text{CO})_{10}$  (0.38 mmol, 248 mg), azobenzene **1a** (2.8 mmol, 510 mg) were added into an oven-dried reaction vessel with Teflon screw cap under a nitrogen atmosphere. Toluene (20 mL) was then added into the reaction tube. The reaction mixture was stirred at 130 °C for 3 days. After the completion, the solvent was removed by rotary evaporation and the residue was sublimed at 65 °C to remove azobenzene in vacuum. After azobenzene was completely removed, the mixture was further sublimed at 75 °C in vacuum for 2 hours affording the pure product **A** in 6% yield.<sup>1b</sup>

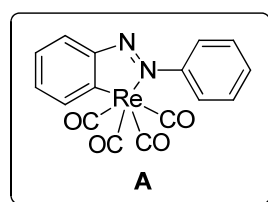

**<sup>1</sup>H NMR (400 MHz, Acetone- $d_6$ ):** 8.35 (dd,  $J_1 = 7.6$  Hz), 8.08 (d,  $J = 6.0$  Hz, 1H), 7.81 - 7.80 (m, 2H), 7.63 - 7.61 (m, 3H), 7.40 - 7.36 (m, 2H).

**<sup>13</sup>C NMR (101 MHz, Acetone- $d_6$ ):** 194.0 (CO), 191.3 (CO), 186.7 (2CO), 169.7, 169.1, 158.0, 142.7, 134.4, 133.5, 131.6, 130.0, 126.4, 123.6.



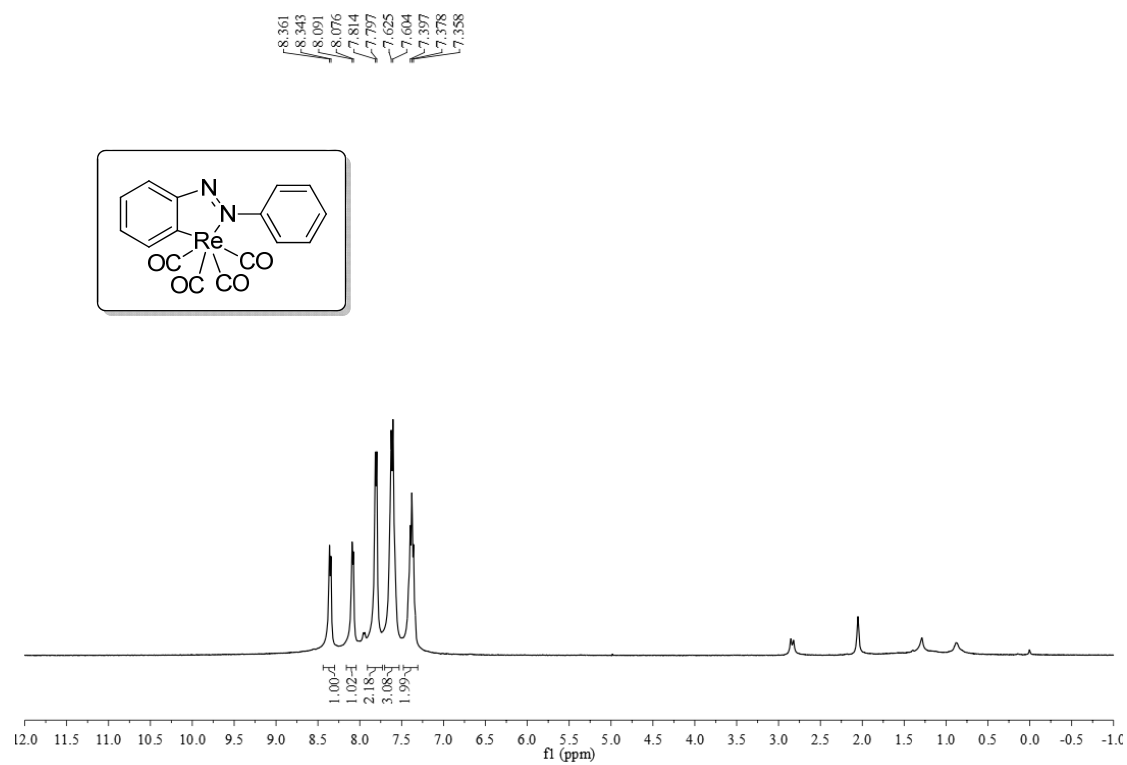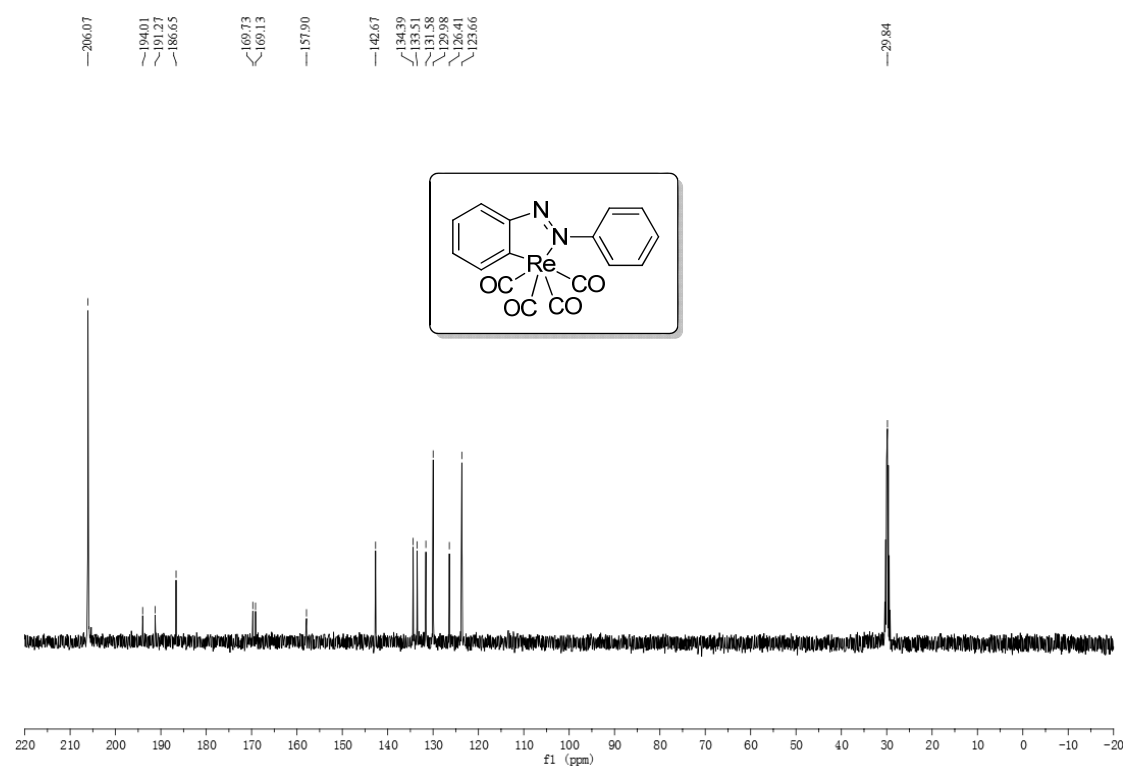

Next, the stoichiometric reaction of **A** with **2i** was conducted and *o*-azobenzamide **3ai** was obtained in 57% isolated yield after column chromatography (Scheme S2). At last, we performed a catalytic reaction of azobenzene **1a** with isocyanate **2i** using

rhenacycle complex **A** as a catalyst under the standard conditions. The reaction proceeded successfully affording the product **3ai** in 78% NMR yield (Scheme S3). These results indicated that the five-member rhenacycle **A** might be a key reaction intermediate in the catalytic reaction.

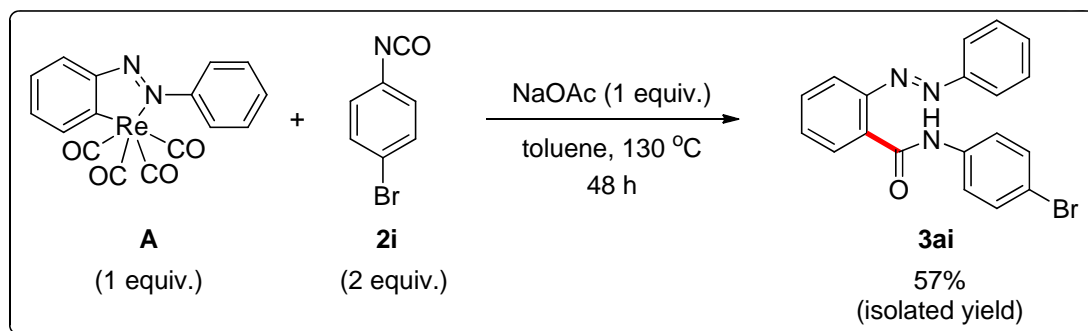

**Scheme S2.** Stoichiometric reaction of rhenacycle **A** with **2i**

**Experimental procedure:**

To an oven-dried tube was added **A** (0.05 mmol 24 mg), *p*-bromophenyl isocyanate **2i** (0.1 mmol, 19.8 mg), NaOAc (0.05 mmol, 4.1 mg) and toluene (0.25 mL) under N<sub>2</sub> atmosphere. The vial was then placed in an oil bath preset to 130 °C. After stirring for 48 h, the vial was removed from the oil bath and was cooled to ambient temperature. After removal of the solvent under vacuum, the residue was subject to column chromatography affording product **3ai** in 57% yield.

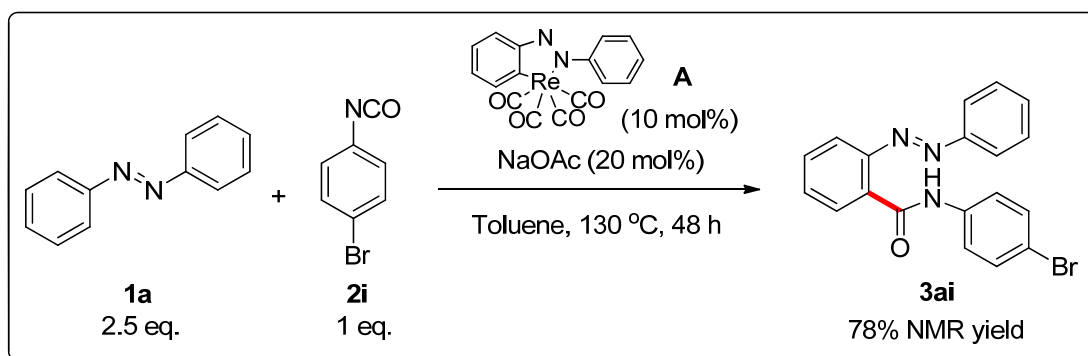

**Scheme S3.** Rhenacycle **A** catalyzed reaction of **1a** and **2i**

**Experimental procedure:**

To an oven-dried tube was added **A** (0.01 mmol 4.8 mg), azobenzene **1a** (0.25 mmol, 45.5 mg), *p*-bromophenyl isocyanate **2i** (0.1 mmol, 19.8 mg), NaOAc (0.02 mmol, 1.6 mg) and toluene (0.5 mL) under N<sub>2</sub> atmosphere. The vial was then placed

in an oil bath preset to 130 °C. After stirring for 48 h, the vial was removed from the oil bath and was cooled to ambient temperature. After removal of the solvent under vacuum, the yield of **3ai** was determined by <sup>1</sup>H NMR using equimolar amount of 1,3,5-trimethoxybenzene as an internal standard.

## 5.2 Probe the nature of the C-H activation step

Fully deuterated azobenzene **1a-d<sub>10</sub>** was prepared from commercially available bromobenzene-*d*<sub>5</sub> (Alfa Aesar, >99% D) according to the procedure shown in Scheme S4.

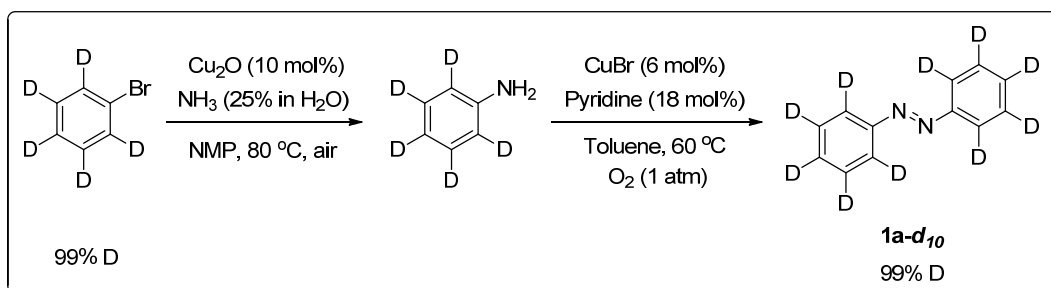

**Scheme S4.** Preparation of deuterated azobenzene **1a-d<sub>10</sub>**

### Dipentadeuteroazobenzene (**1a-d<sub>10</sub>**)

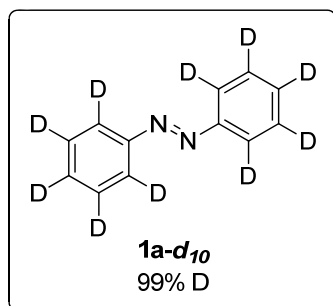

Pentadeuteroaniline was prepared from bromobenzene-*d*<sub>5</sub> (10 mmol, 1.6 g) by a known procedure<sup>4</sup> and then treated with CuBr, pyridine following the previous described general procedure A using O<sub>2</sub> as oxidant for the synthesis of dipentadeuteroazobenzene **1a-d<sub>10</sub>**. After workup, the title compound was isolated by column chromatography (PE/EA = 50:1) as reddish solid in 50% yield.<sup>1b</sup>

To determine whether the C-H activation step is a deprotonative cyclization process, deuterium-labeling experiments were next explored. The reaction of dipentadeuteroazobenzene **1a-d<sub>10</sub>** with phenyl isocyanate **2a** resulted in the partial loss of deuterium at the *ortho*-positions of both the starting material and the product (Scheme S5). We proposed that the loss of deuterium arose from the exchange of deuterium with protons in the reaction solution.

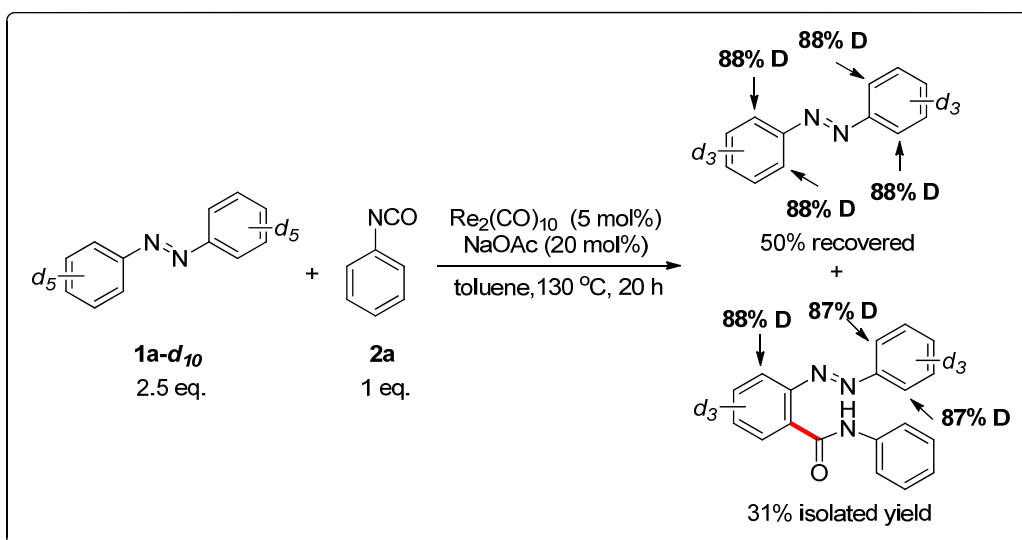

**Scheme S5.** Deuterium-labeling experiment with **1a-d<sub>10</sub>**

**Experimental procedure:**

$\text{Re}_2(\text{CO})_{10}$  (0.01 mmol, 6.5 mg), NaOAc (0.04 mmol, 3.2 mg), phenyl isocyanate **2a** (0.2 mmol, 23.8 mg), dipentadeuteroazobenzene **1a-d<sub>10</sub>** (0.5 mmol, 96.0 mg) and toluene (1 ml) were added into an oven-dried reaction vessel. The solution was stirred at 130 °C for 24 h. After completion, the reaction mixture was filtered through a short pad of silica gel and washed with ethyl acetate. The filtrate was concentrated by rotary evaporation and the residue was purified by silica gel column chromatography to afford the pure product in 31% yield and the recovered starting material in 50% yield (based on the loading of **1a-d<sub>10</sub>**), which was analyzed by  $^1\text{H}$  NMR in  $\text{CDCl}_3$ . The D-content in the recovered starting material was analyzed using an equimolar amount of 1,3,5-trimethoxybenzene as the internal standard.

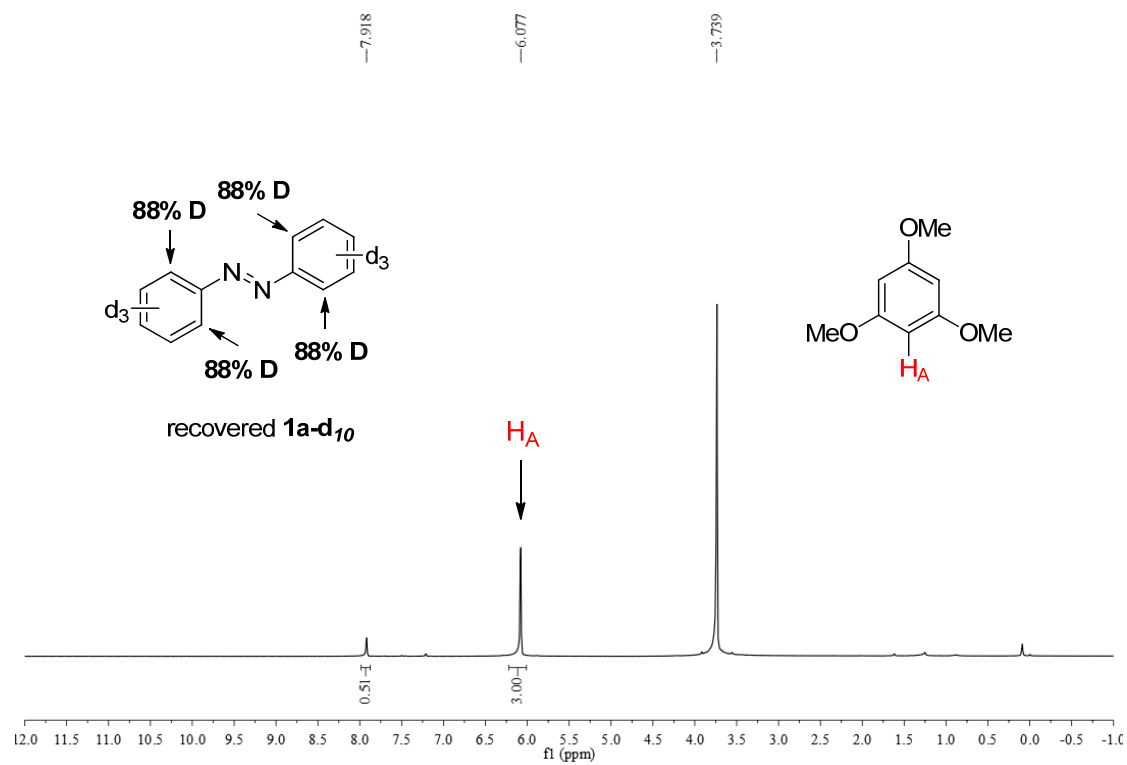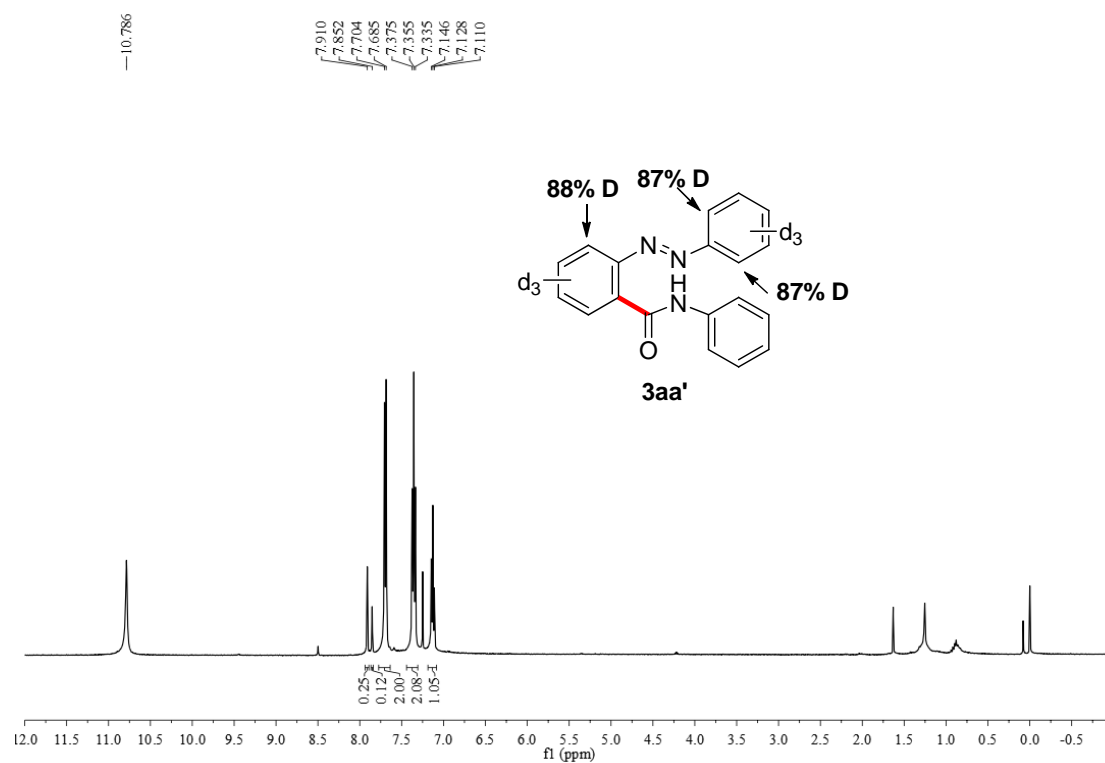

To further confirm the exchange of H/D, the reaction of azobenzene **1a** with D<sub>2</sub>O was tested and the incorporation of deuterium at the *ortho*-positions of the recovered **1a** was detected, which confirmed our assumption (Scheme S6).

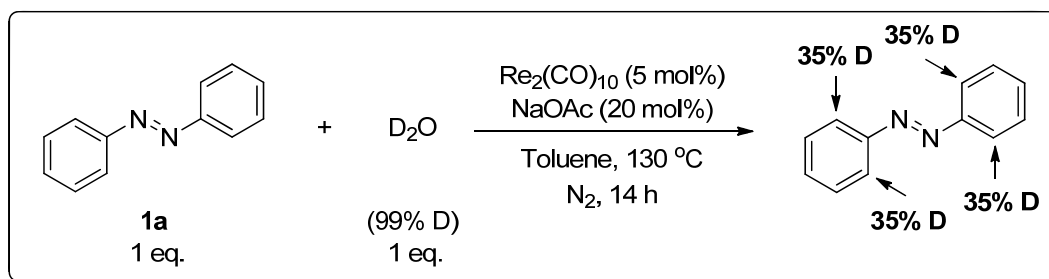

**Scheme S6.** H/D scrambling experiment of **1a** with D<sub>2</sub>O

**Experimental procedure:**

Re<sub>2</sub>(CO)<sub>10</sub> (0.025 mmol, 6.5 mg), azobenzene **1a** (0.2 mmol, 36.4 mg), NaOAc (0.04 mmol, 3.2 mg), D<sub>2</sub>O (0.2 mmol, 3.6 mg) and toluene (1 mL) were added into an oven-dried reaction vessel. The solution was stirred at 130 °C for 14 h. After completion, the reaction mixture was filtered through a short pad of silica gel and washed with ethyl acetate. The filtrate was concentrated by rotary evaporation and the residue was analyzed by <sup>1</sup>H NMR in CDCl<sub>3</sub>.

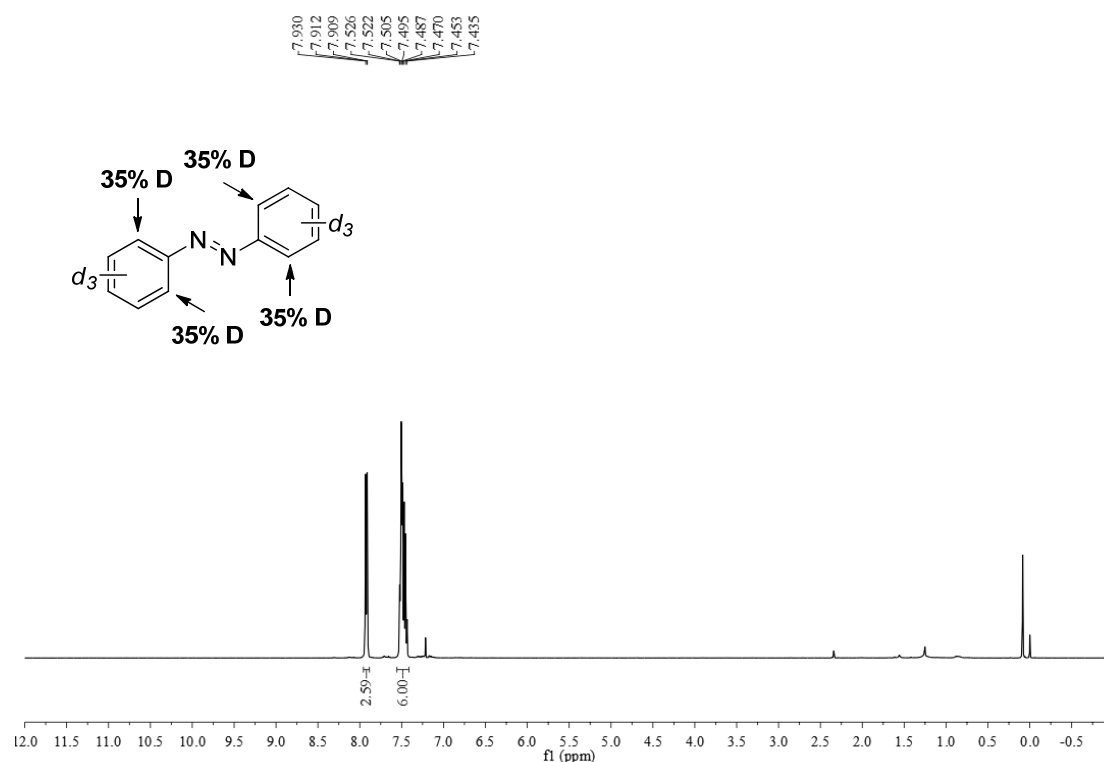

To investigate whether the C-H activation step is reversible without the addition of NaOAc, the combination of azobenzene **1a** with a catalytic amount of Re<sub>2</sub>(CO)<sub>10</sub> in

the present of D<sub>2</sub>O was examined. It turned out that only negligible D-incorporation at the *ortho*-positions of recovered **1a** was observed (Scheme S7). This result indicated that an irreversible C-H activation step occurred in the absent of NaOAc.

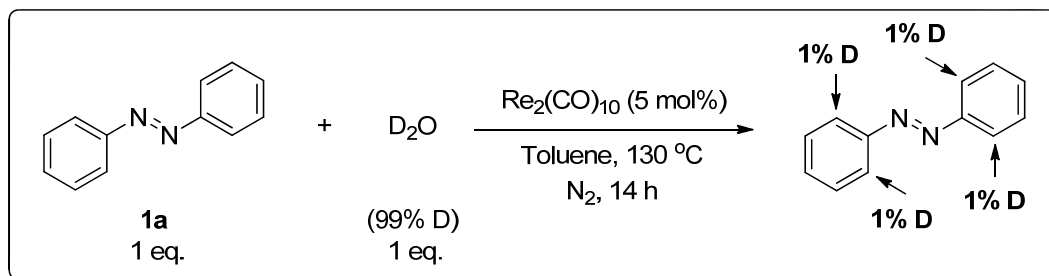

**Scheme S7.** H/D exchange experiment of **1a** and D<sub>2</sub>O in the absence of NaOAc.

### Experimental procedure:

Re<sub>2</sub>(CO)<sub>10</sub> (0.025 mmol, 6.5 mg), azobenzene **1a** (0.2 mmol, 36.4 mg), D<sub>2</sub>O (0.2 mmol, 3.6 mg) and toluene (1 mL) were added into an oven-dried reaction vessel. The solution was stirred at 130 °C for 14 h. After completion, the solvent was removed by rotary evaporation and the residue was analyzed by <sup>1</sup>H NMR in CDCl<sub>3</sub>.

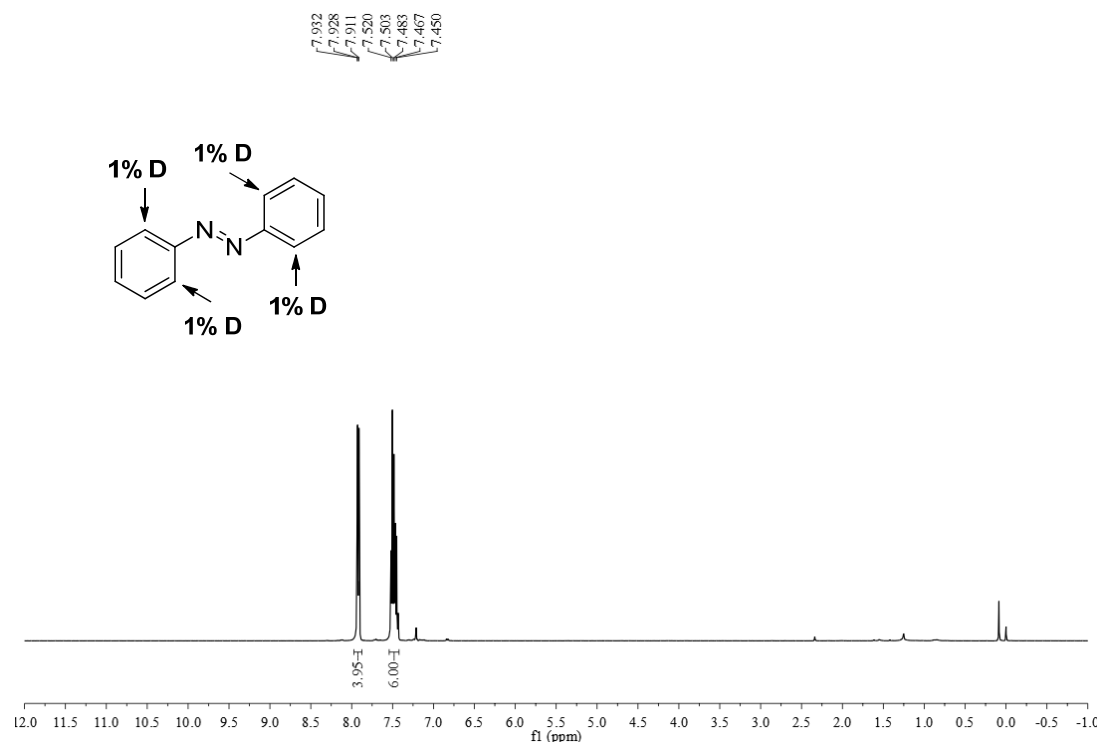

Similarly, the reaction of dipentadeuteroazobenzene **3a-d<sub>10</sub>** with *p*-chlorophenyl isocyanate **2h** under the standard conditions resulted in only a very small amount of

deuterium loss in the product **3ah-d<sub>9</sub>** as well as the recovered azobenzene **1a-d<sub>10</sub>** (Scheme S8).

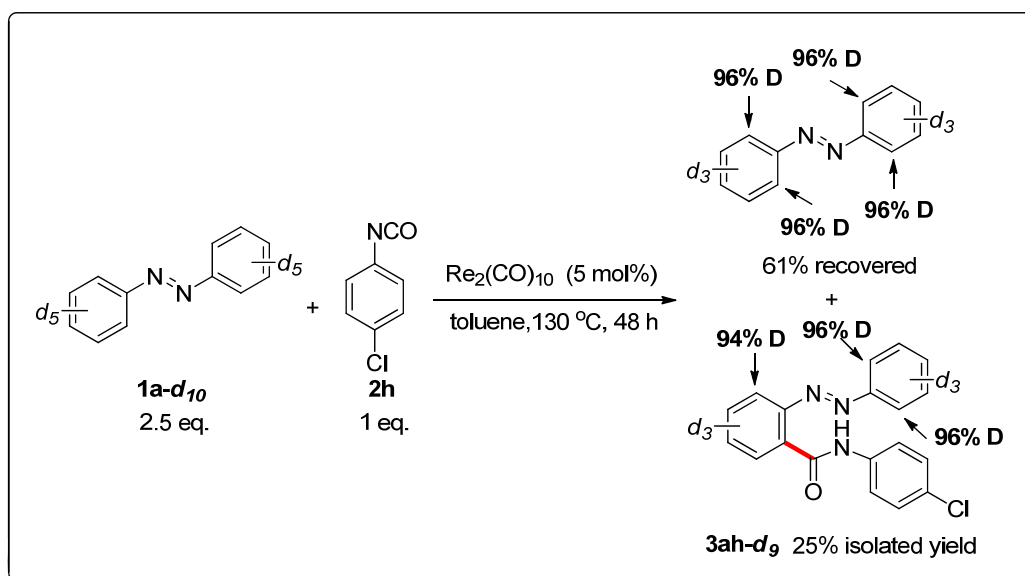

**Scheme S8.** H/D exchange experiment of **1a-d<sub>10</sub>** with **2h** in the absence of NaOAc.

#### Experimental procedure:

$\text{Re}_2(\text{CO})_{10}$  (0.025 mmol, 6.5 mg), azobenzene **1a-d<sub>10</sub>** (0.5 mmol, 96.0 mg), *p*-chlorophenyl isocyanate **2h** (0.2 mmol, 30.7 mg) and toluene (1 mL) were added into an oven-dried reaction vessel. The solution was stirred at 130 °C for 48 h. After completion, the reaction mixture was filtered through a short pad of silica gel and washed with ethyl acetate. The filtrate was concentrated by rotary evaporation and the residue was purified by silica gel column chromatography to afford the pure product **3ah-d<sub>9</sub>** in 25% yield and the recovered starting material in 61% yield (based on the loading of **1a-d<sub>10</sub>**), which was analyzed by  $^1\text{H}$  NMR in  $\text{CDCl}_3$ . The D-content in the recovered starting material was analyzed using an equimolar amount of 1,3,5-trimethoxybenzene as the internal standard.



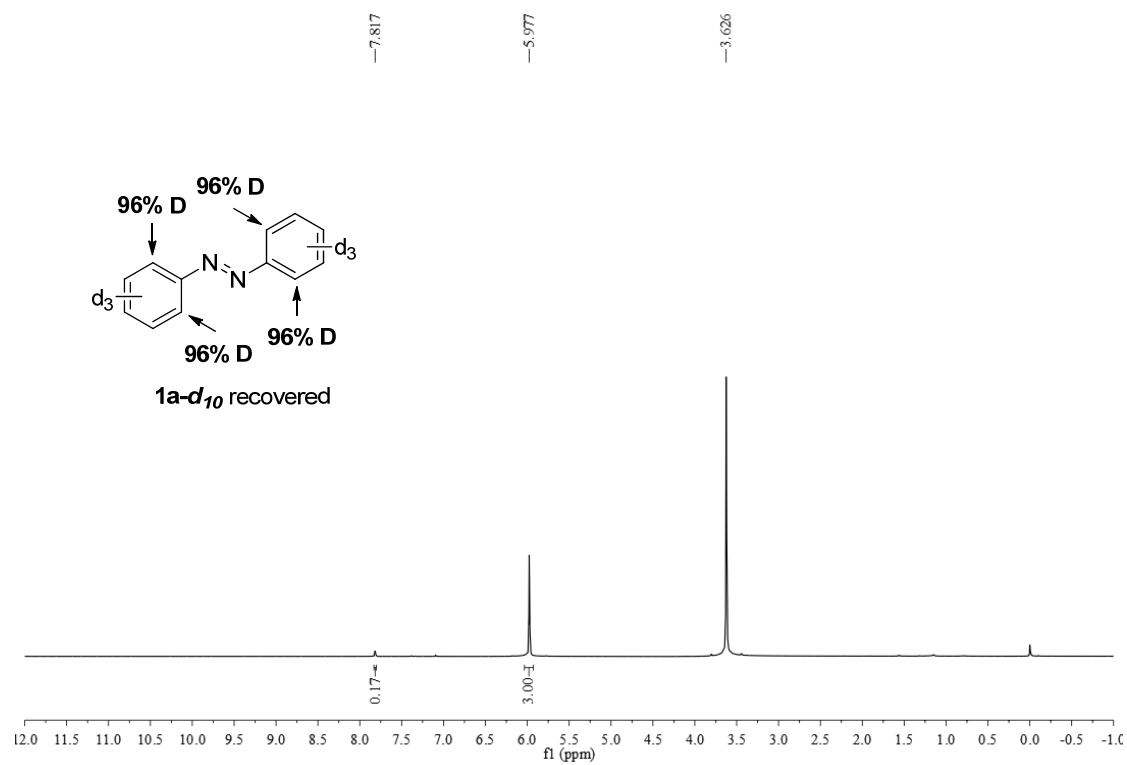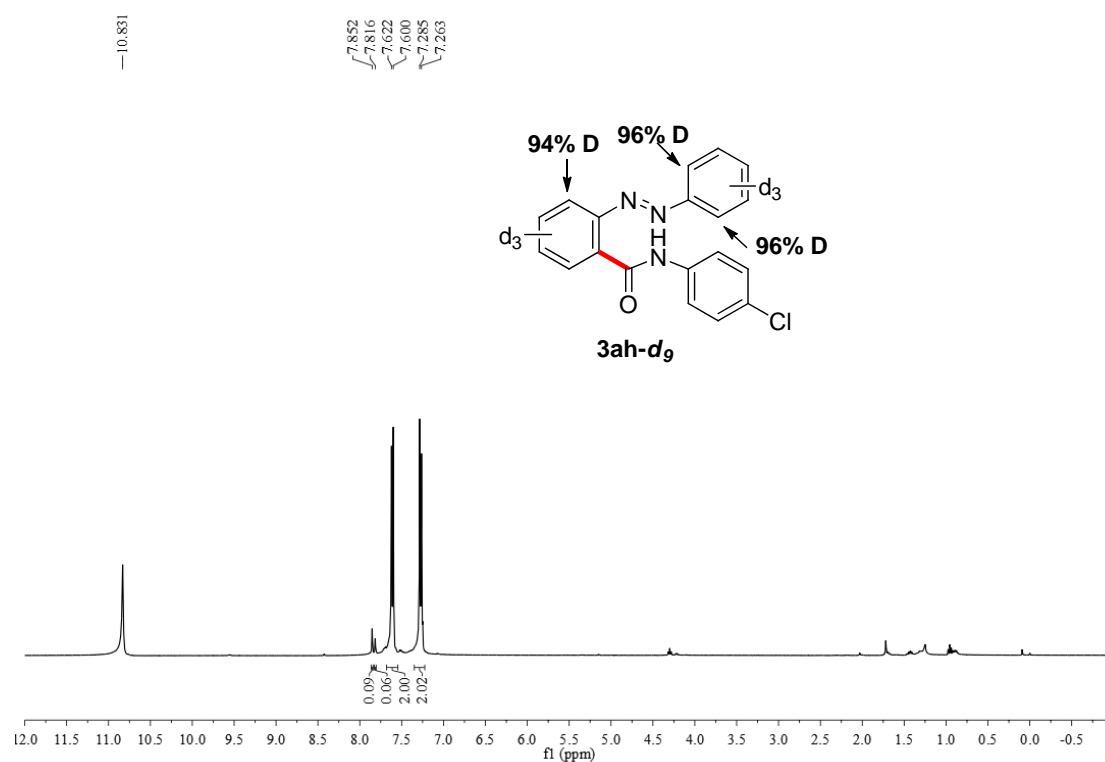

### 5.3 KIE experiments

Two parallel reactions of **2a** with **1a** and **1a-d<sub>10</sub>** respectively were performed to determine the corresponding KIE value. **1a** (0.25 mmol, 45.5 mg) and **1a-d<sub>10</sub>** (0.25

mmol, 48.0 mg) were placed in an oven-dried Schlenk tube respectively, and then treated with the same mixture of **2a** (0.1 mmol, 11.9 mg),  $\text{Re}_2(\text{CO})_{10}$  (0.005 mmol, 3.2 mg), 1,3,5-trimethoxybenzene (internal standard, 0.1 mmol, 16.8 mg) in anhydrous toluene (0.5 mL) at 130 °C under  $\text{N}_2$  atmosphere. Each reaction was sampled at the following indicated points and analyzed by GC-MS. The GC yields were calculated after calibrating the response of GC.

|                            |      |      |      |       |       |      |      |      |
|----------------------------|------|------|------|-------|-------|------|------|------|
| Time (h)                   | 0    | 2    | 4    | 6     | 8     | 9    | 10   | 11   |
| GC Yield of <b>3aa</b> (%) | 0    | 0    | 0    | 0.150 | 0.899 | 1.98 | 2.70 | 4.40 |
| Time (h)                   | 12   | 13   | 14   | 15    | 16    |      |      |      |
| GC Yield of <b>3aa</b> (%) | 7.63 | 12.1 | 16.5 | 22.3  | 26.8  |      |      |      |

|                             |      |      |      |      |      |      |    |       |
|-----------------------------|------|------|------|------|------|------|----|-------|
| Time (h)                    | 0    | 2    | 4    | 6    | 8    | 9    | 10 | 11    |
| GC Yield of <b>3aa'</b> (%) | 0    | 0    | 0    | 0    | 0    | 0    | 0  | 0.487 |
| Time (h)                    | 12   | 13   | 14   | 15   | 16   | 17   |    |       |
| GC Yield of <b>3aa'</b> (%) | 2.82 | 4.92 | 6.99 | 9.20 | 11.2 | 14.1 |    |       |

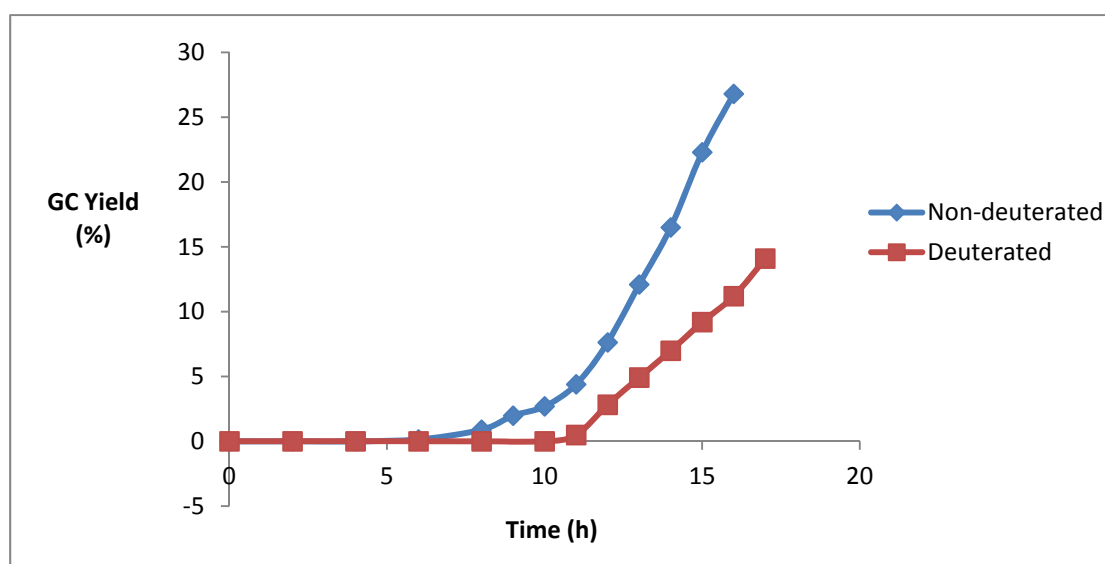

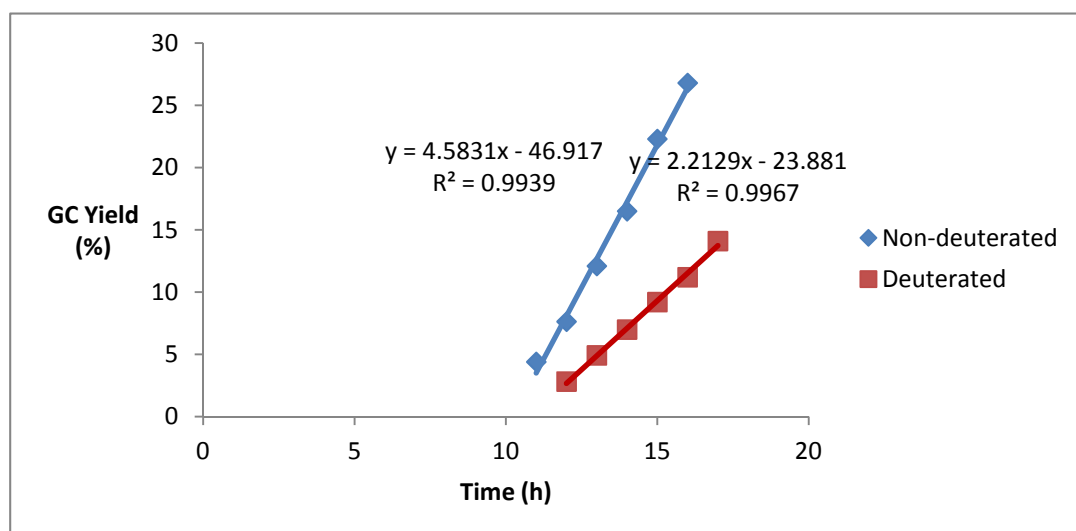

$$\text{KIE} = 4.583/2.212 = 2.07$$

KIE value from the two parallel reactions was determined to be 2.07. The primary KIE measured by the above experiments indicated that the cleavage of the C–H bond might be involved in the rate-determining step of the reaction.

#### 5.4 Competition Experiments.

In order to gain more insight into the reaction mechanism, competition experiments were studied. Equalmolar amounts of azobenzene **1b** and **1f** bearing Me and CF<sub>3</sub> groups respectively at the *para*-positions were treated with equalmolar amount of *p*-chlorophenyl isocyanate **2h** in the presence of Re<sub>2</sub>(CO)<sub>10</sub> and NaOAc (Scheme S9). The *o*-azobenzamide **3fh** derived from **1f** turned out to be the major product.

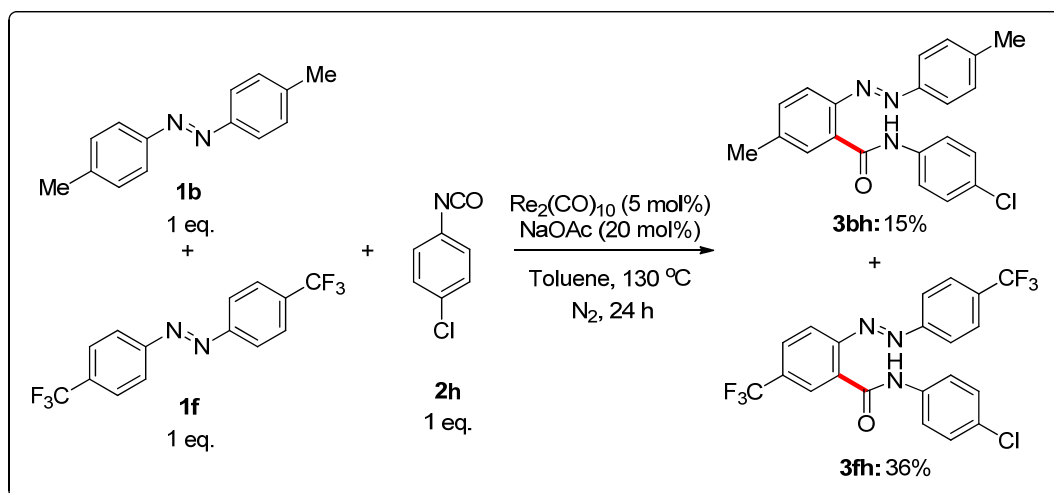

**Scheme S9.** Competition experiment of substituted azobenzenes

A deprotonation pathway is proposed to be involved in the C-H activation step. Therefore, azobenzenes bearing electron-withdrawing group such as CF<sub>3</sub> undergo easier deprotonative C-H activation to give kinetically more favored product as shown in Scheme 6. However, azoarenes bearing electron-donating groups such as Me group might form the thermodynamically more favored product in higher yield, albeit with lower reaction rate in comparison with electron-poor azobenzenes.

### Experimental procedure:

Re<sub>2</sub>(CO)<sub>10</sub> (0.025 mmol, 6.5 mg), azobenzene **1b** (0.2 mmol, 42.0 mg), **1f** (0.2 mmol, 63.6 mg), NaOAc (0.04 mmol, 3.2 mg) and toluene (1 mL) were added into an oven-dried reaction vessel. The solution was stirred at 130 °C for 24 h. After completion, the reaction mixture was filtered through a short pad of silica gel and washed with ethyl acetate. The filtrate was concentrated by rotary evaporation and the residue was analyzed by <sup>1</sup>H NMR using equalmolar amount of 1,3,5-trimethoxybenzene as internal in CDCl<sub>3</sub>.

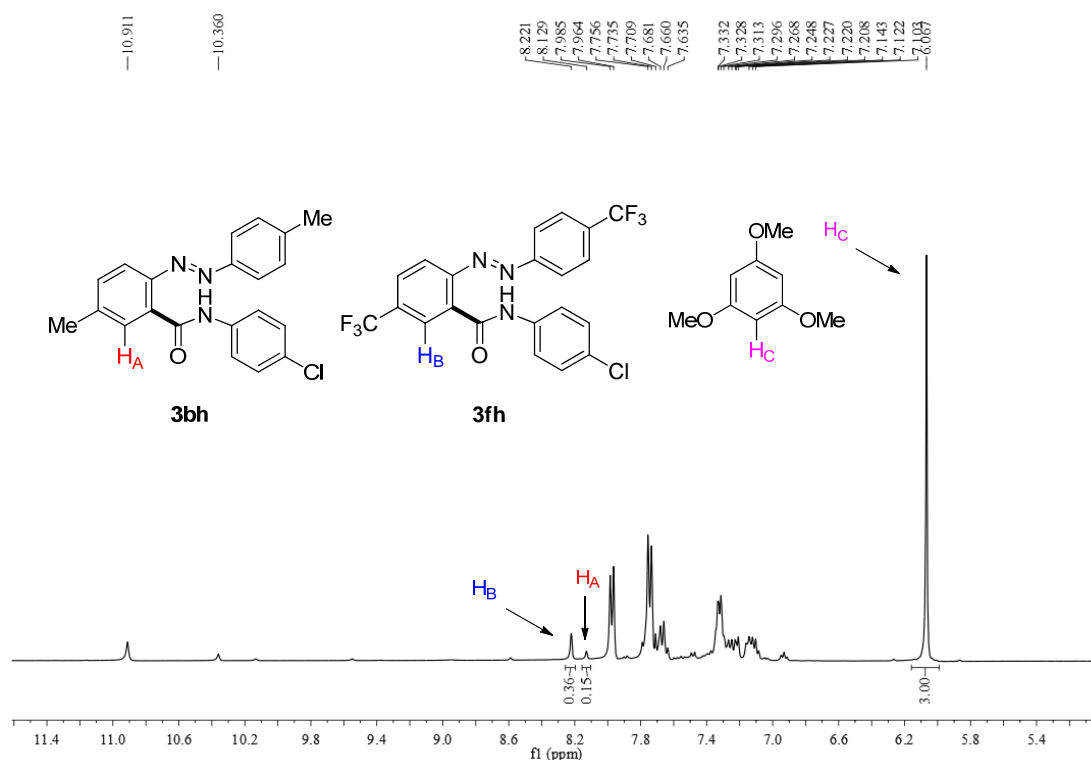

Moreover, the competition reaction between phenyl isocyanate **2b** and **2f** was carried out in order to probe the following steps after C–H bond activation (Scheme S10). It was shown that **1a** reacted preferentially with the electron-deficient phenyl isocyanate **2f** affording **3af** in 38% yield as the major product.

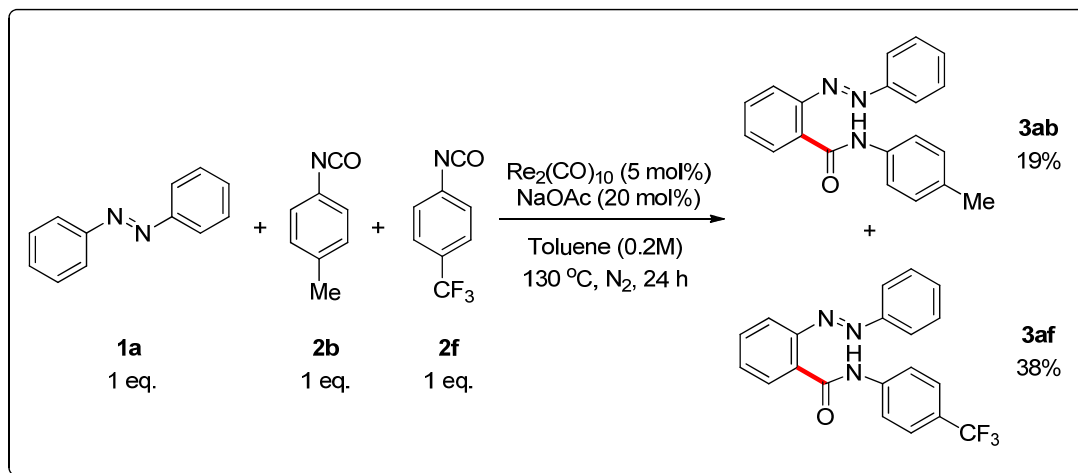

**Scheme S10.** Competition Experiment of substituted phenyl isocyanates

#### Experimental procedure:

$\text{Re}_2(\text{CO})_{10}$  (0.025 mmol, 6.5 mg), azobenzene **1a** (0.2 mmol, 36.4 mg), **2b** (0.2 mmol, 26.6 mg), **2f** (0.2 mmol, 37.4 mg), NaOAc (0.04 mmol, 3.2 mg) and toluene (1 mL) were added into an oven-dried reaction vessel. The solution was stirred at  $130\text{ }^\circ\text{C}$  for 24 h. After completion, the reaction mixture was filtered through a short pad of silica gel and washed with ethyl acetate. The filtrate was concentrated by rotary evaporation and the residue was analyzed by  $^1\text{H}$  NMR using equalmolar amount of 1,3,5-trimethoxybenzene as internal standard in  $\text{CDCl}_3$ .

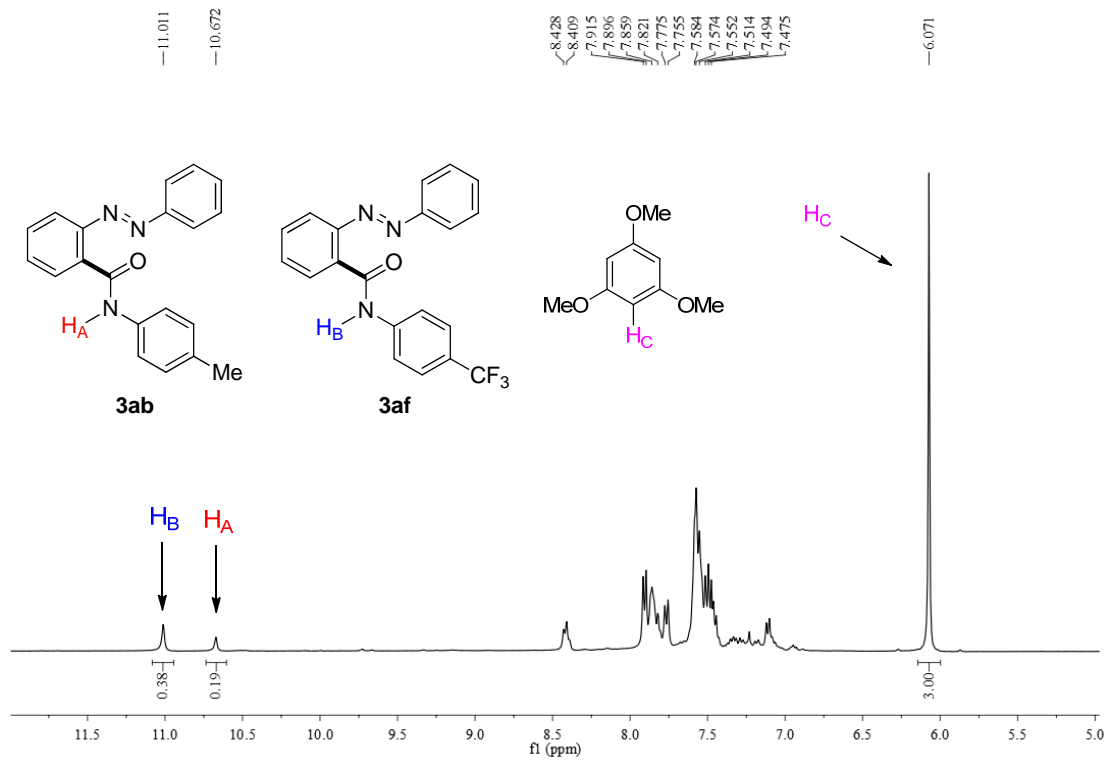

## 6. Synthetic transformations of *o*-azobenzamides

With the obtained *o*-azobenzamides in hand, we performed application experiments to shown their synthetic utilities. As an example, *o*-azobenzamide **3aa** was treated with Zn/NH<sub>4</sub>Cl to afford the reduced product, diphenylhydrazine **6aa**, in 92% yield (Scheme S11).

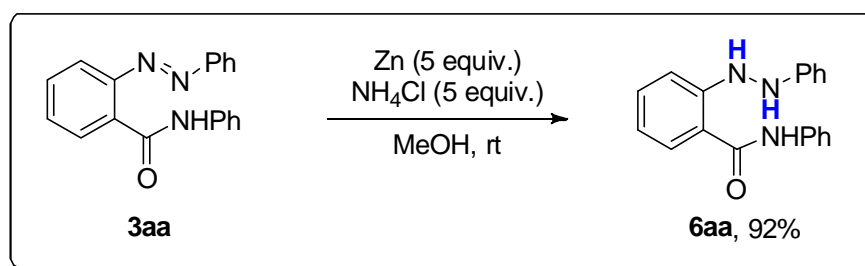

**Scheme S11.** Reduction of *o*-azobenzamide **3aa**

### Experimental procedure:

*o*-Azobenzamide **3aa** (0.1 mmol, 30.1 mg), Zn (0.5 mmol, 32.5 mg), NH<sub>4</sub>Cl (0.5 mmol, 56.5 mg), and absolute methanol (1 mL) were added into a round-bottom flask. The solution was stirred at room temperature for 5 h. After completion, the reaction mixture was filtered through a short pad of silica gel and washed with ethyl acetate. The filtrate was concentrated by rotary evaporation and the residue was subjected to column chromatography to afford the pure product **6aa** in 92% yield.

### *N*-phenyl-2-(2-phenylhydrazinyl)benzamide (**6aa**)

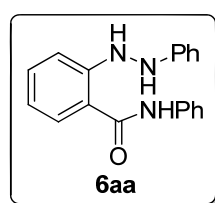

<sup>1</sup>H NMR (400 MHz, CDCl<sub>3</sub>): 8.79 (s, 1H), 7.84 (s, 1H), 7.55 (d, *J* = 8.4 Hz, 2H), 7.48 (d, *J* = 8.0 Hz, 1H), 7.36 – 7.27 (m, 3H), 7.22 – 7.12 (m, 4H), 6.82 – 6.79 (m, 3H), 7.67 (t, *J* = 7.2 Hz, 1H), 5.57 (s, 1H).

<sup>13</sup>C NMR (101 MHz, CDCl<sub>3</sub>): 167.7, 151.1, 148.5, 137.8, 133.5, 129.4, 129.2, 127.2, 124.8, 120.7, 120.0, 117.5, 115.6, 113.3, 112.4.

HRMS (MALDI-MS): calculated for C<sub>19</sub>H<sub>17</sub>N<sub>3</sub>NaO ([M+Na]<sup>+</sup>) 326.12638, found 326.12644.

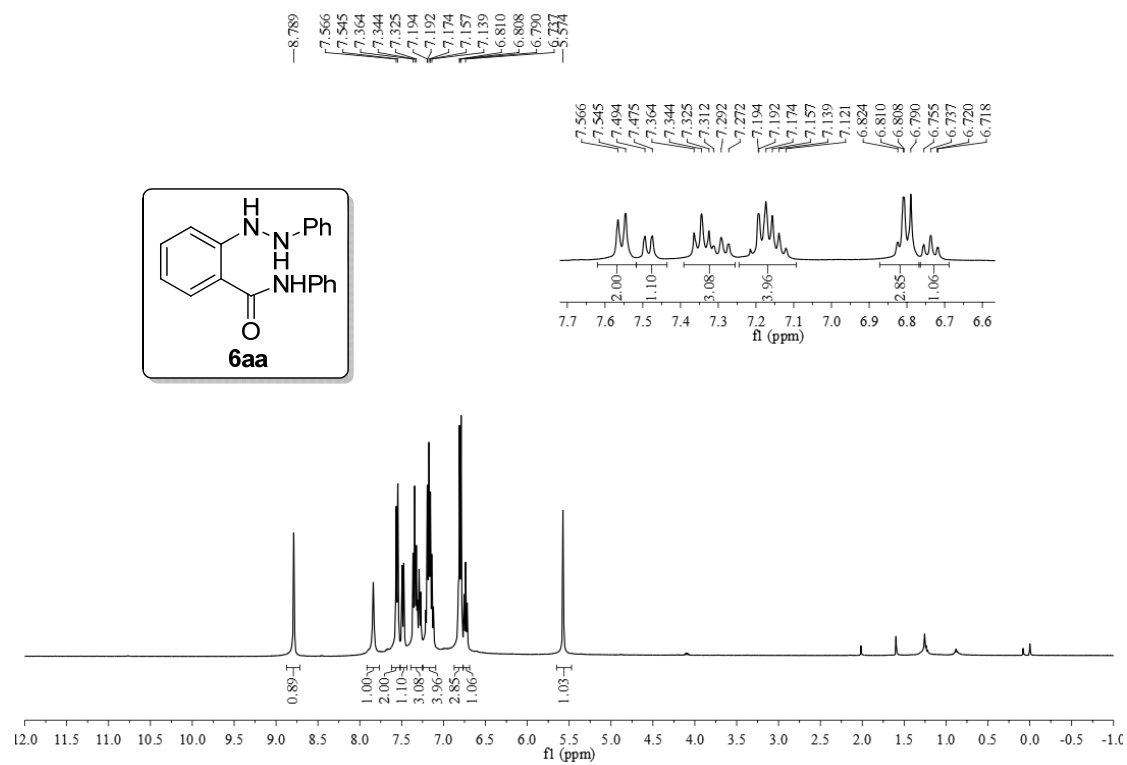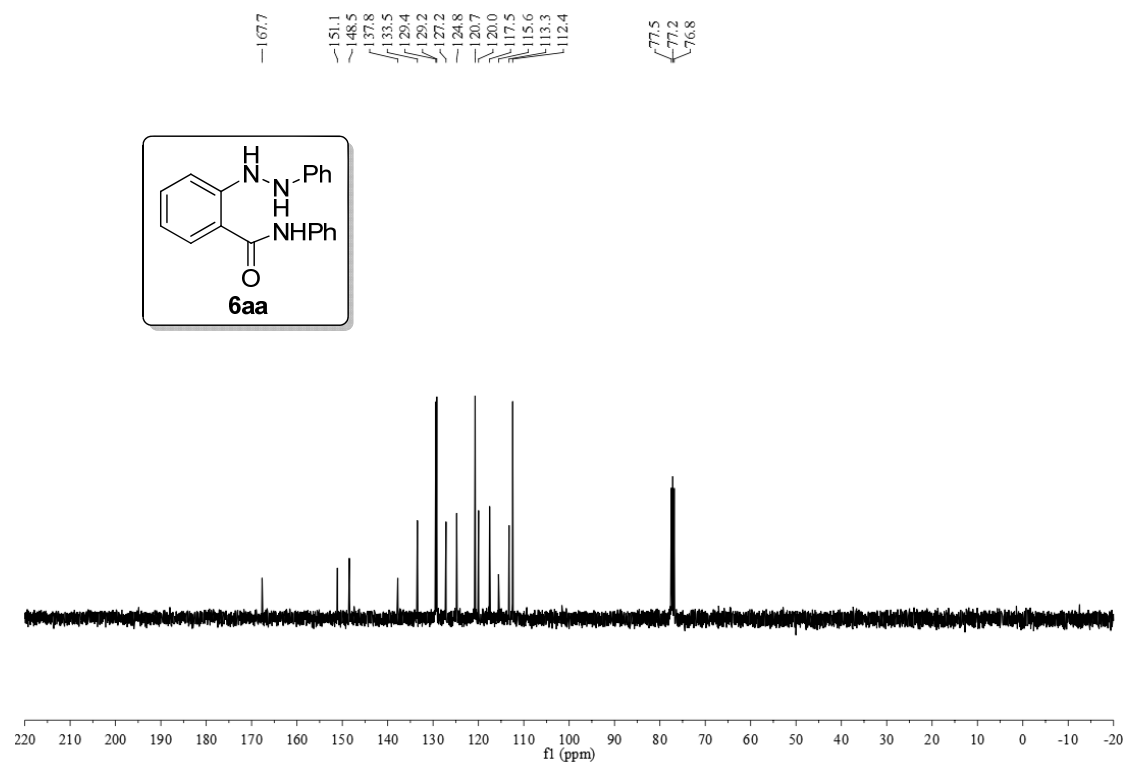

By combination of Re-catalyzed mono-C-H aminocarbonylation with other transition metal catalyzed C-H activation, sequential C-H bond transformations could be achieved. For instance, *o*-azobenzamide **3aa** underwent the second C-H acylation



reaction under the catalysis of palladium giving unsymmetrical azobenzene derivative **7aa** smoothly (Scheme S12).

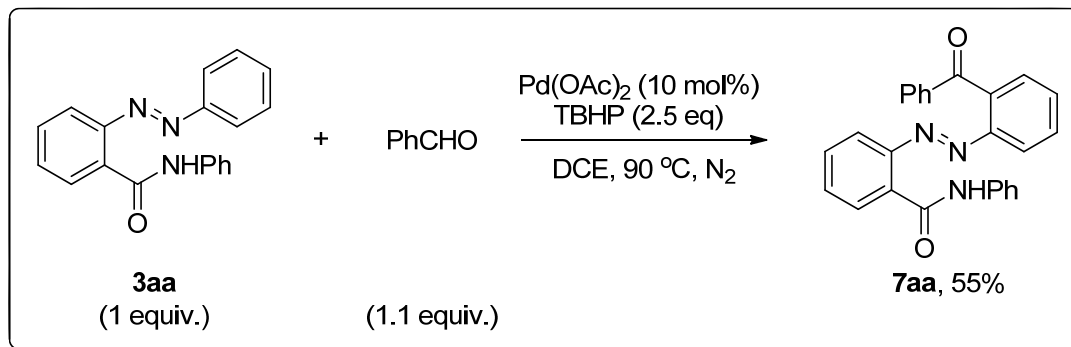

**Scheme S12.** Pd-catalyzed C-H acylation of *o*-azobenzamide **3aa**

#### Experimental procedure<sup>5</sup>:

Pd(OAc)<sub>2</sub> (0.01 mmol, 2.3 mg), *o*-azobenzamide **3aa** (0.1 mmol, 30.1 mg), TBHP (0.25 mmol) benzaldehyde (0.11 mmol, 11.2 mg) and 1,2-dichloroethane (0.5 mL) were added into an oven-dried reaction vessel under N<sub>2</sub> atmosphere. The solution was stirred at 90 °C for 24 h. After completion, the reaction mixture was filtered through a short pad of silica gel and washed with ethyl acetate. The filtrate was concentrated by rotary evaporation and the residue was subjected to column chromatography to afford the pure product **7aa** in 55% yield.

#### (*E*)-2-((2-benzoylphenyl)diazanyl)-*N*-phenylbenzamide (**7aa**)

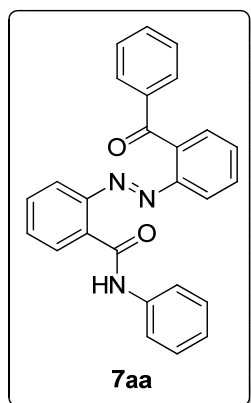

**<sup>1</sup>H NMR (400 MHz, CDCl<sub>3</sub>):** 10.35 (s, 1H), 8.32 (d, *J* = 8.0 Hz), 7.79 – 7.66 (m, 8H), 7.51 – 7.49 (m, 2H), 7.41 – 7.25 (m, 5H), 7.14 (t, *J* = 7.6 Hz, 1H), 6.96 (d, *J* = 8.0 Hz, 1H).

**<sup>13</sup>C NMR (101 MHz, CDCl<sub>3</sub>):** 196.5, 163.6, 150.6, 149.0, 138.9, 138.5, 138.3, 133.3, 132.2, 132.1, 131.9, 131.7, 131.4, 129.8, 129.6, 129.2, 128.6, 124.5, 120.4, 117.2, 116.1.

**HRMS (MALDI-MS):** calculated for C<sub>26</sub>H<sub>19</sub>N<sub>3</sub>NaO<sub>2</sub> ([M+Na]<sup>+</sup>)

428.13695, found 428.13696.

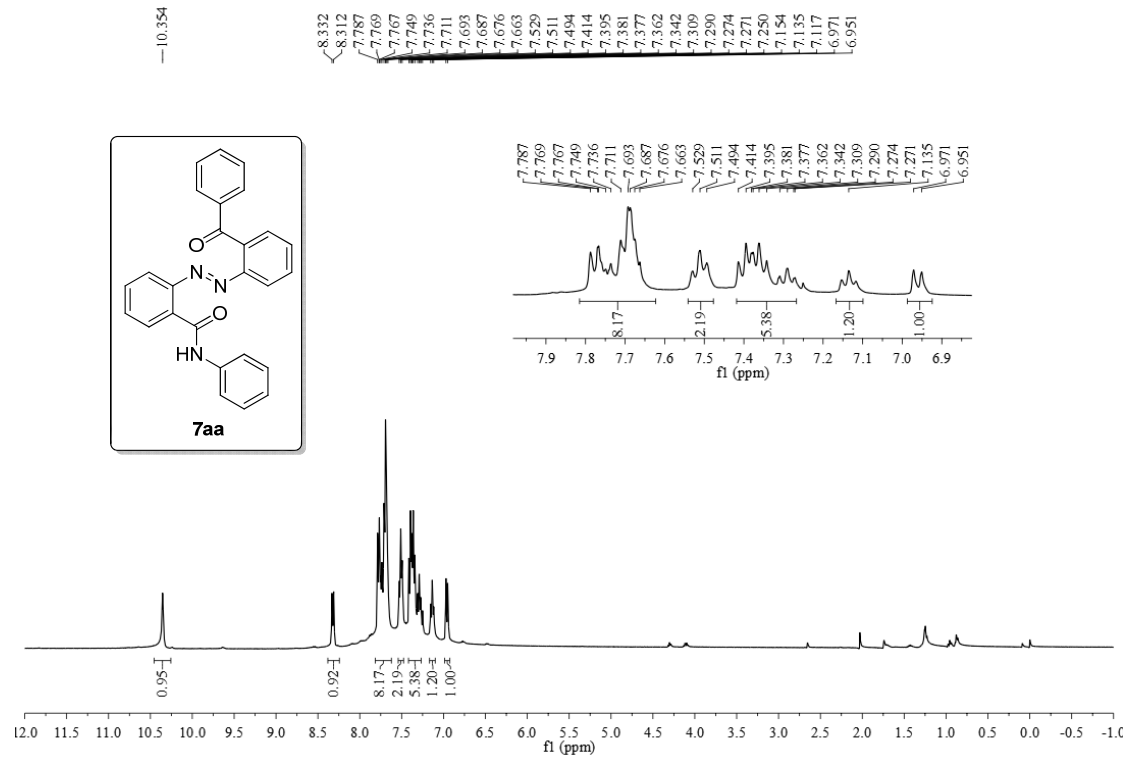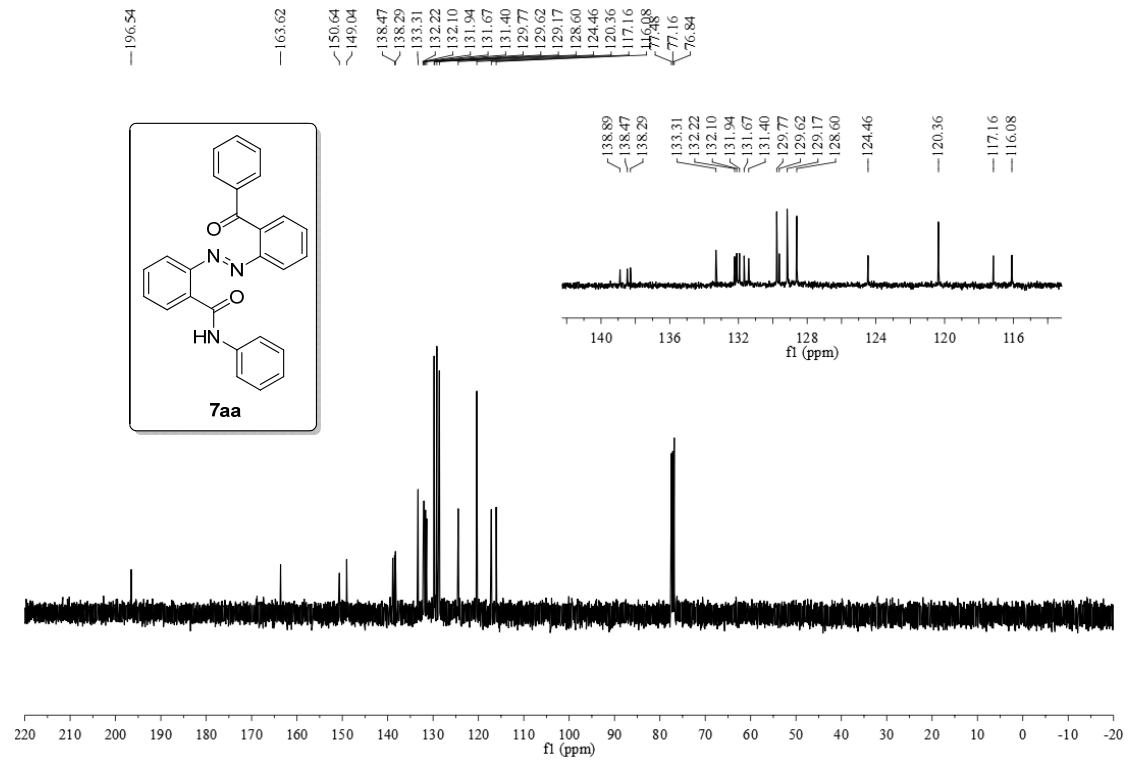

## 6. References

- 1 (a) C. Zhang and N. Jiao, *Angew. Chem. Int. Ed.* 2010, **49**, 6174-6177. (b) Geng, X.; Wang, C. *Org. Lett.* **2015**, DOI: 10.1021/acs.orglett.5b00938.
- 2 Badger, G. M.; Drewer, R. J.; Lewis, G. E. *Aust. J. Chem.* 1964, **17**, 1036-1049.
- 3 (a) K. Thalluri, S. R. Manne, D. Dev and B. Mandal, *J. Org. Chem.*, 2014, **79**, 3765-3775; (b) A. Yoshimura, M. Luedtke, V. Zhadankin, *J. Org. Chem.* 2012, **77**, 2087-2091; (c) S. Lesniak, A. Chrostowska, D. Kuc, M. Maciejczyk, S. Khayar, R. Nazarski and L. Urbaniak, *Tetrahedron*, 2009, **65**, 10581-10589; (d) V.; Usharani, R. Bhujanga, M. Reddy and P. Dubey, *Asian J. Chem.*, 2011, **23**, 1802-1806. (e) Y. Charalambides and S. Moratti, *Synthetic. Comm.*, 2007, **37**, 1037-1044; (f) E. P. Trub, E. N., Boitsov, B. M. Tsigin, *J. Appl. Spectrosc.*, 1984, **41**, 1232-1236.
- 4 L. Zhang, K. Chen, G. Chen, B. Li, S. Luo, Q. Guo, J. Wei and Z.-J. Shi, *Org. Lett.* 2013, **15**, 10-13.
- 5 H. Li, P. Li and L. Wang, *Org. Lett.* 2013, **15**, 620-623.

## 7. Spectra of Products

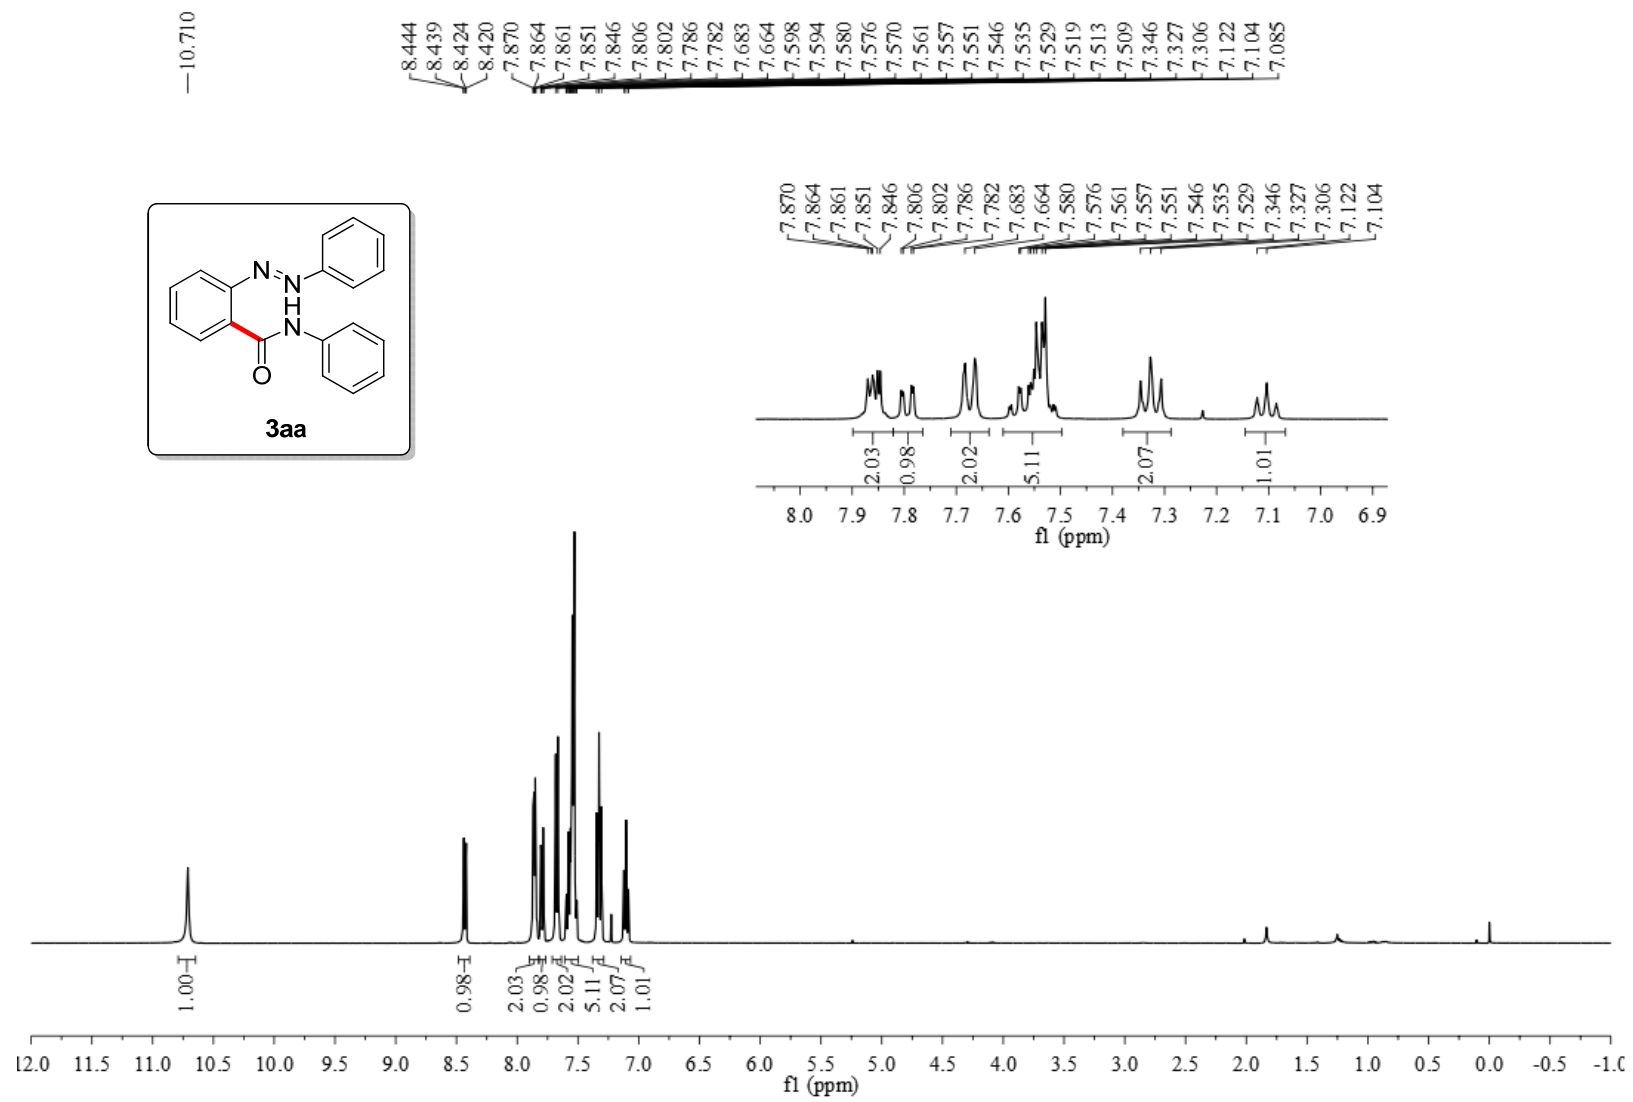

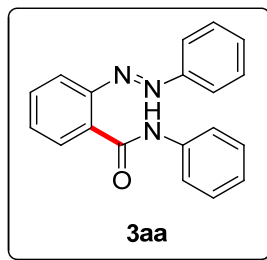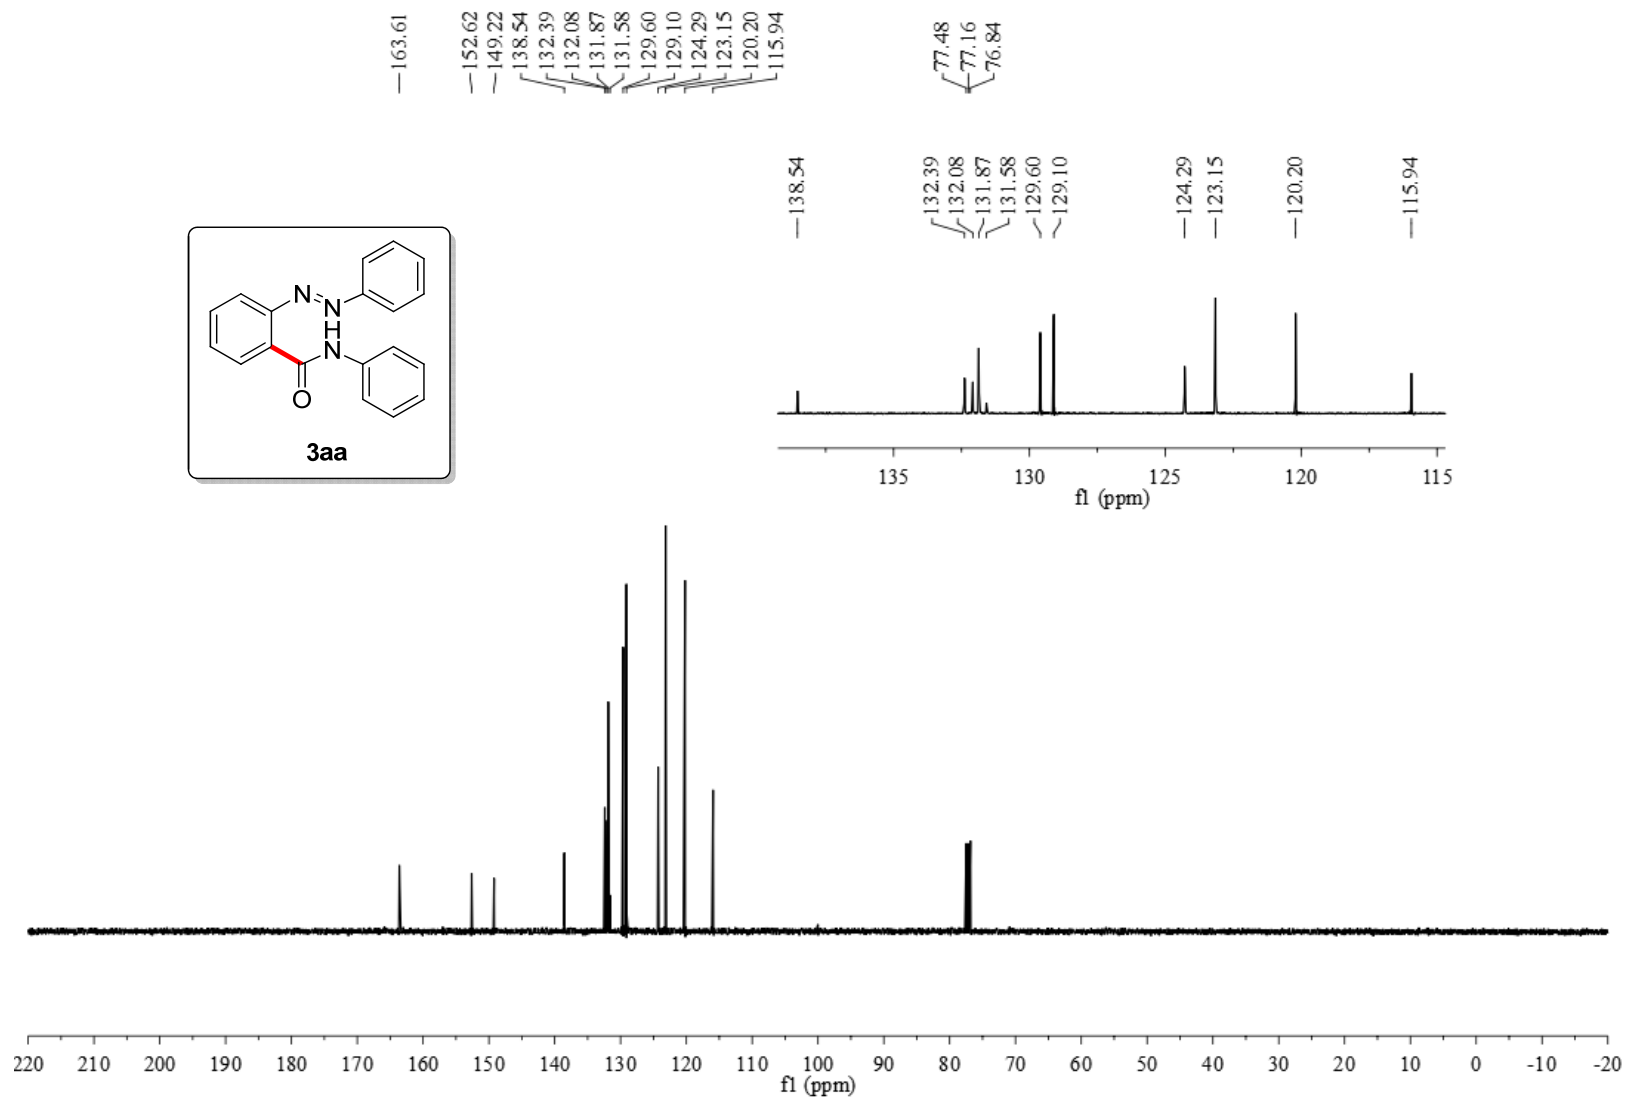

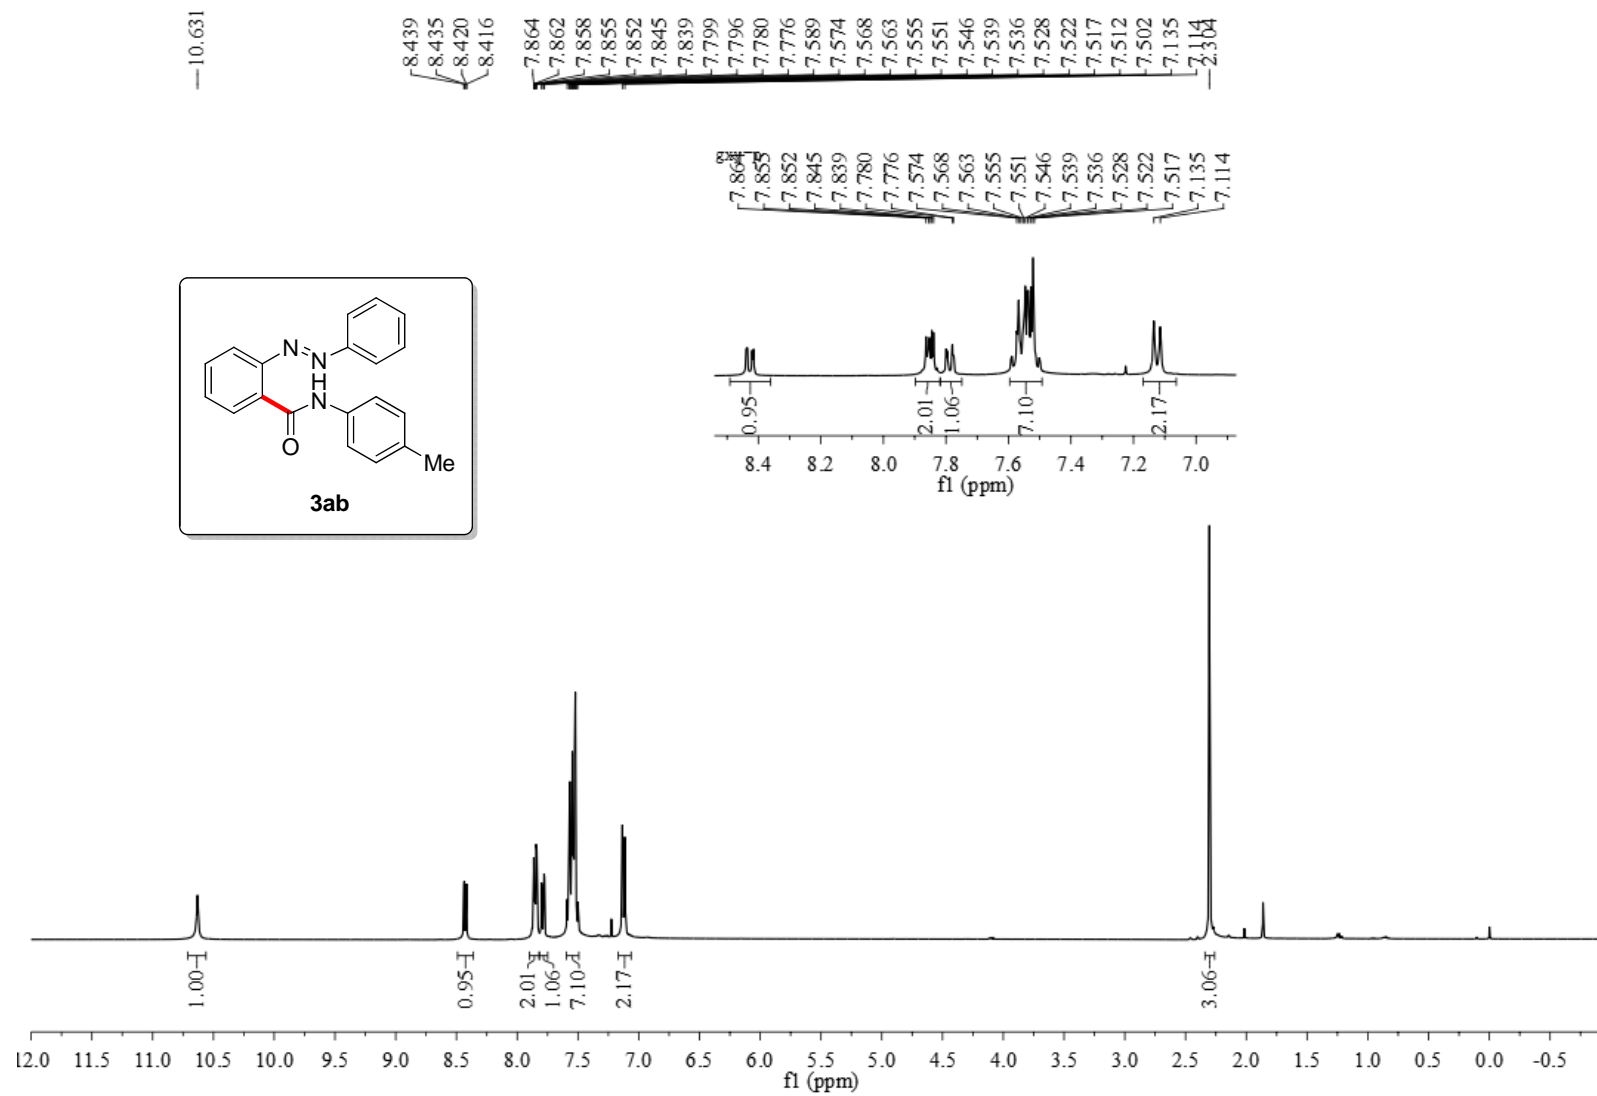

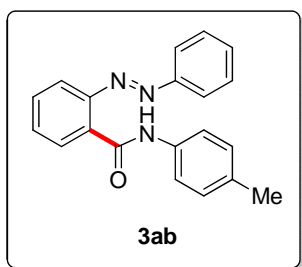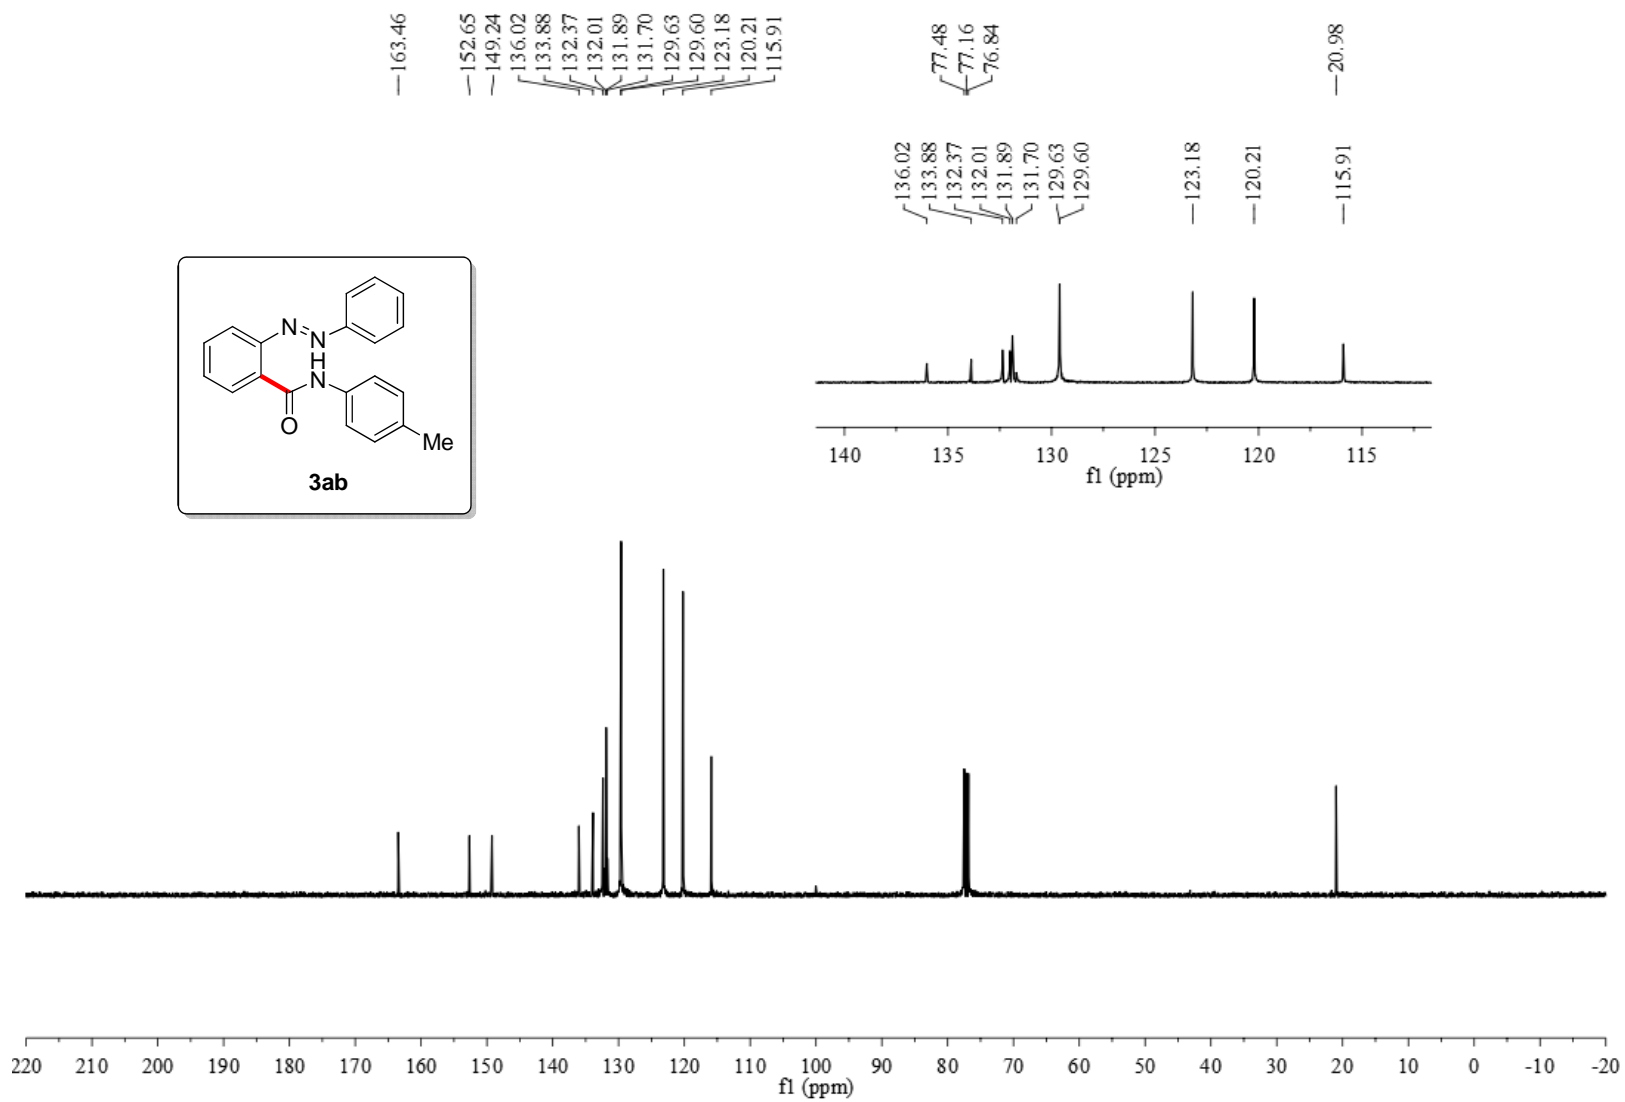

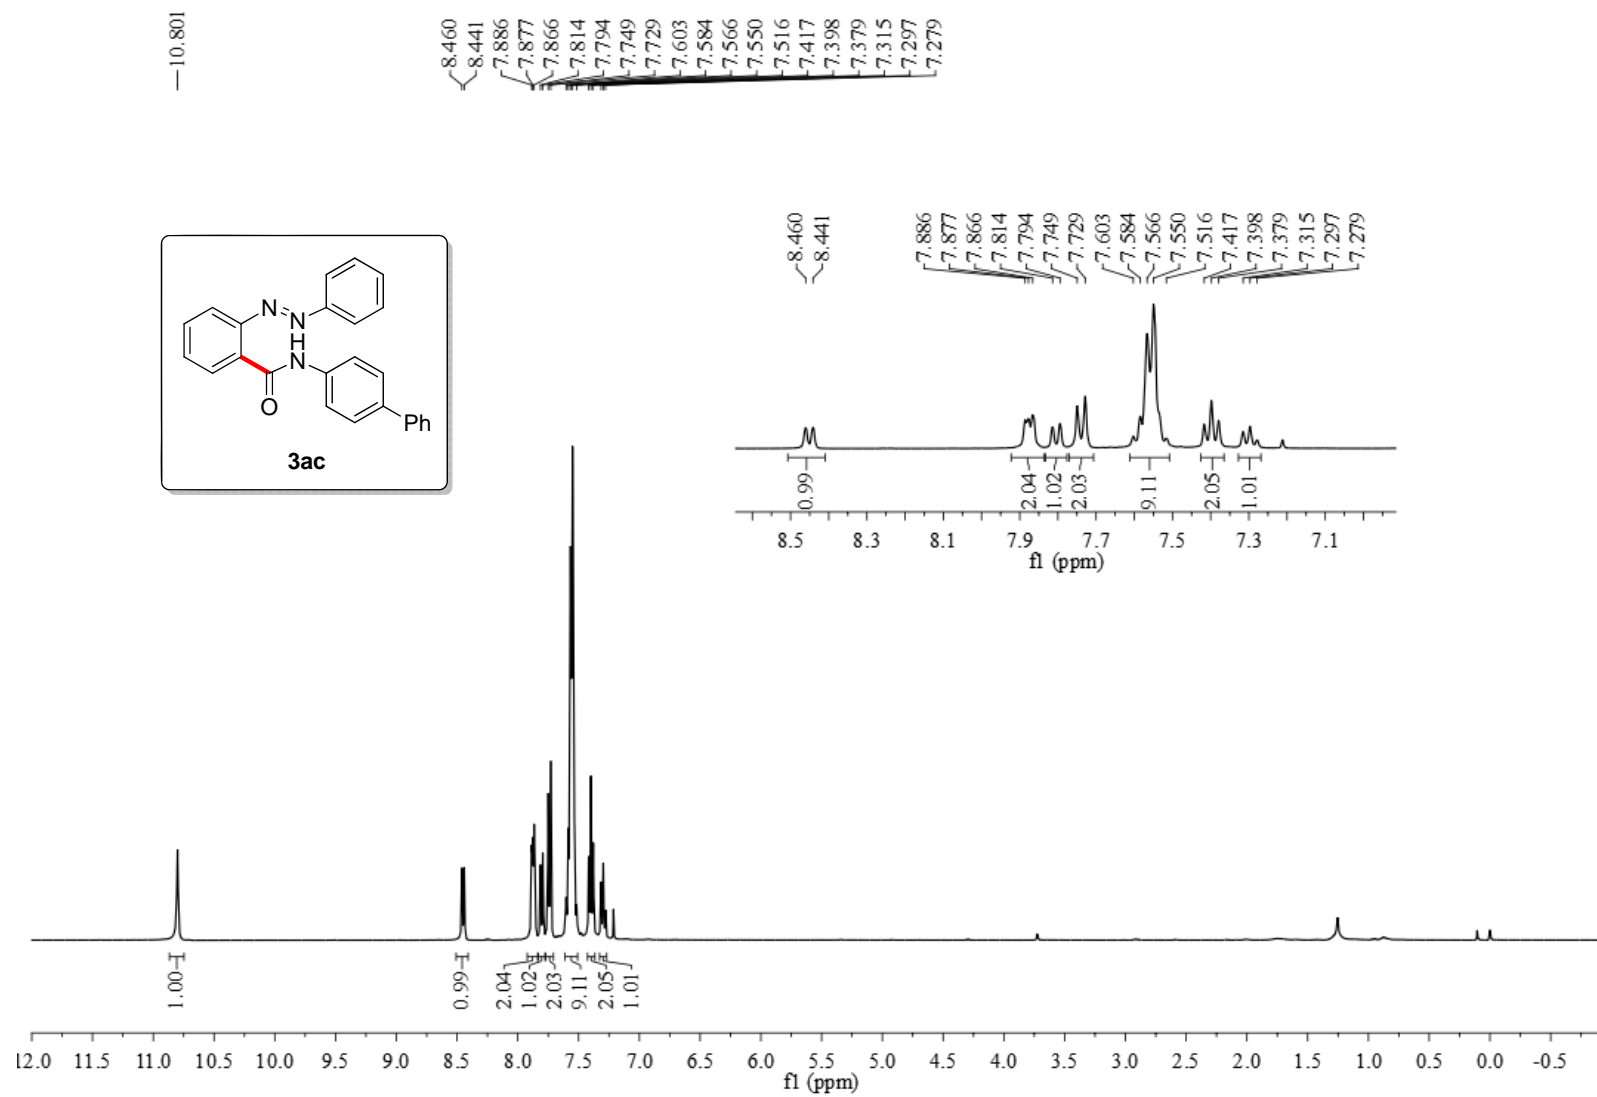



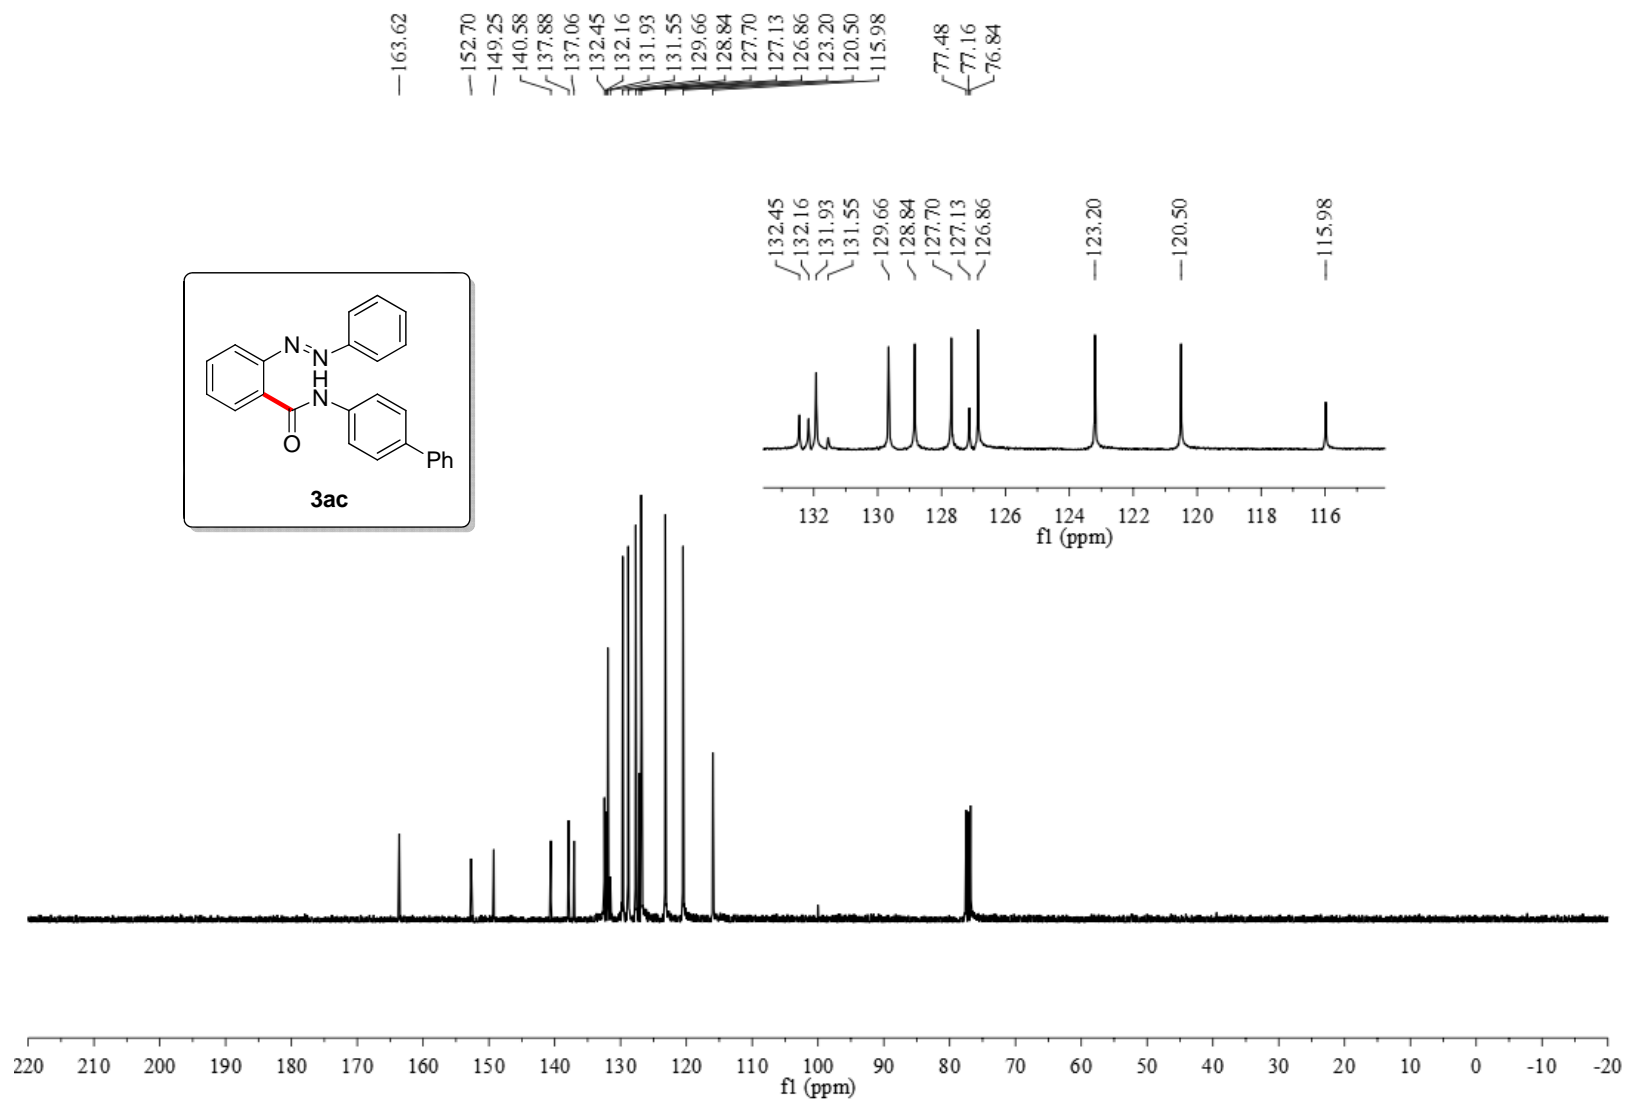

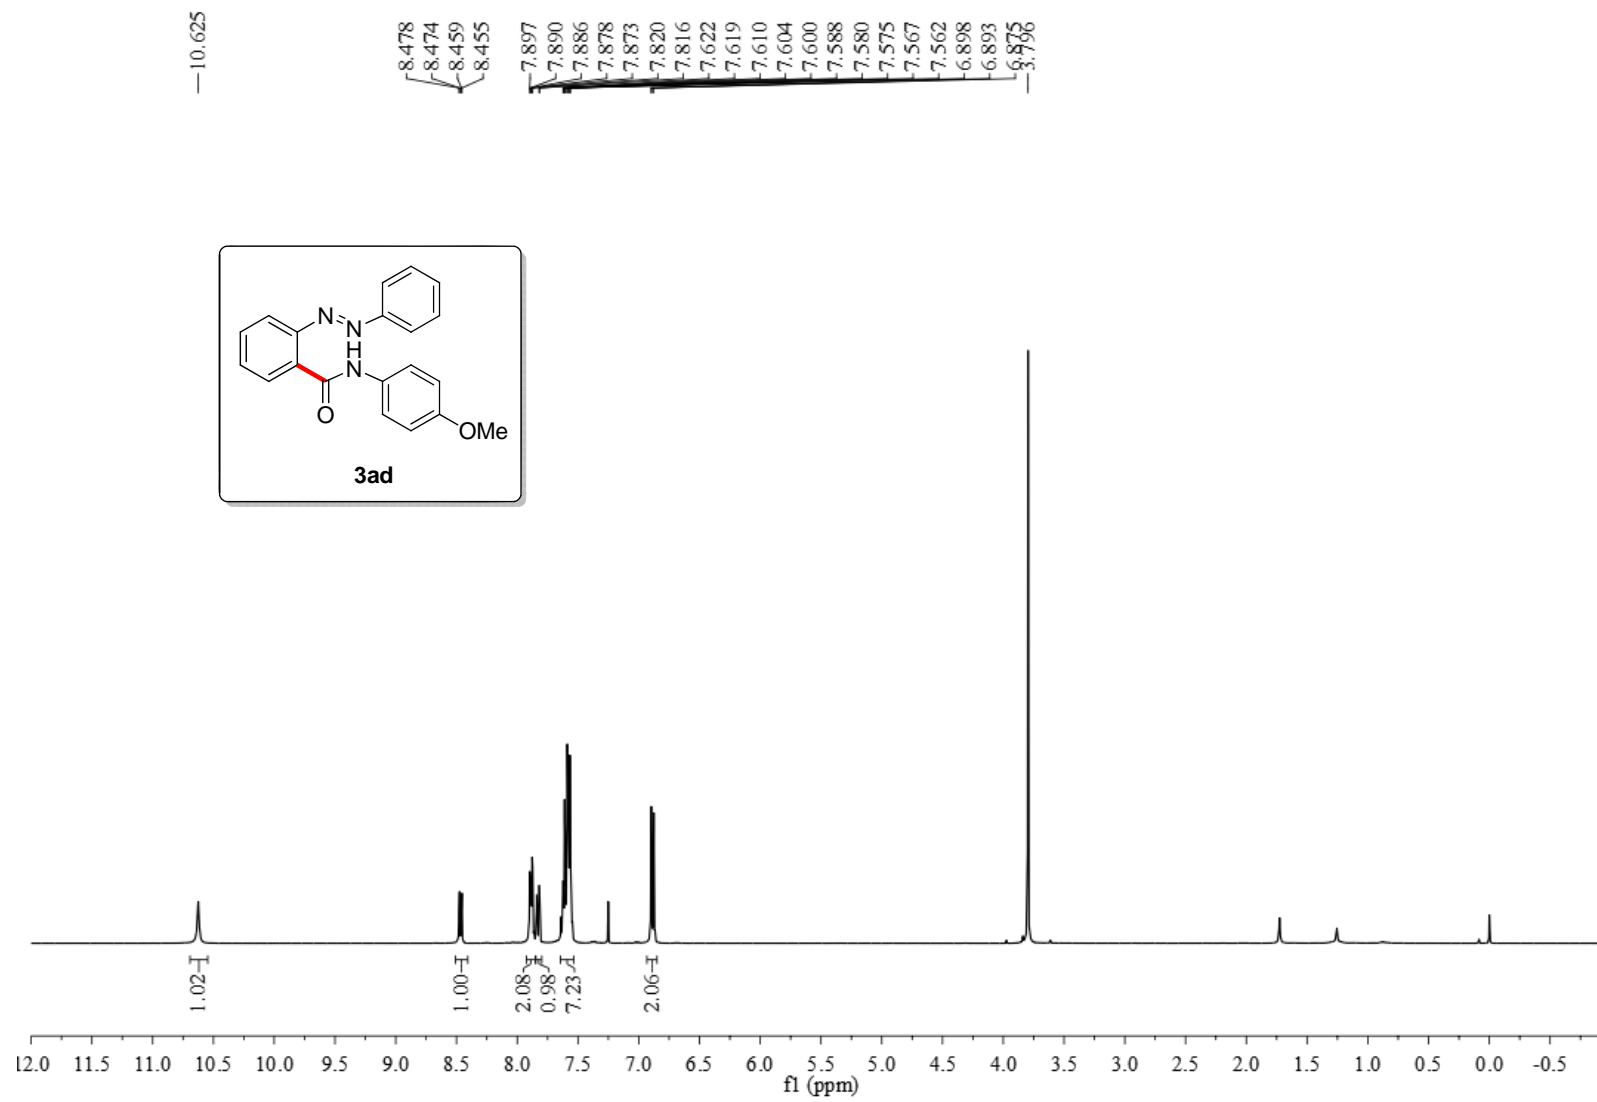

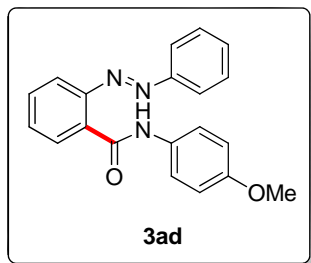

163.42  
156.46  
152.73  
149.32  
132.42  
132.04  
131.95  
131.92  
131.83  
131.70  
129.68  
123.19  
121.82  
115.96  
114.34

77.48  
77.16  
76.84

55.59

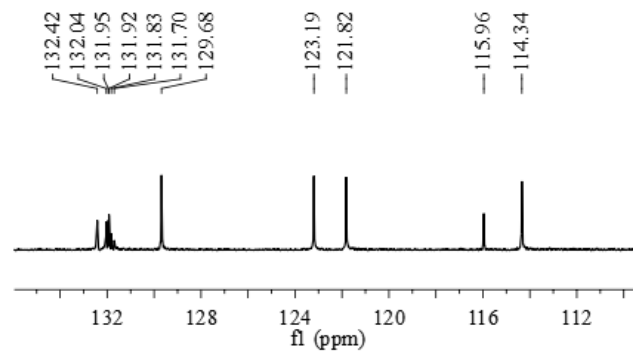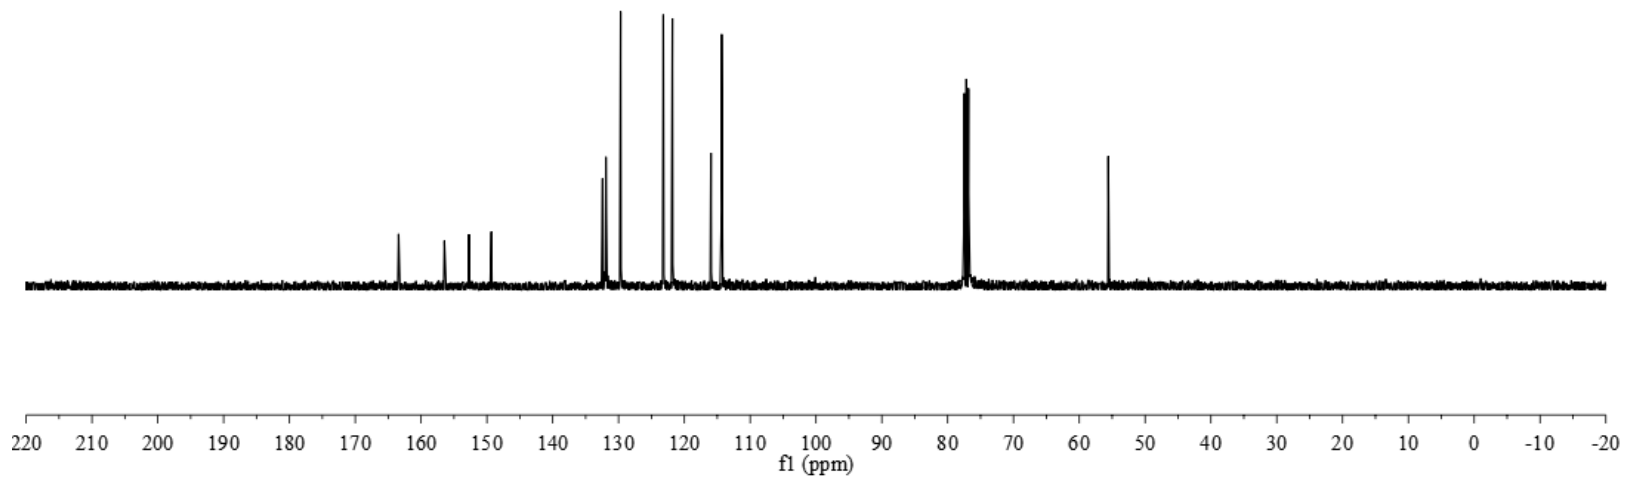

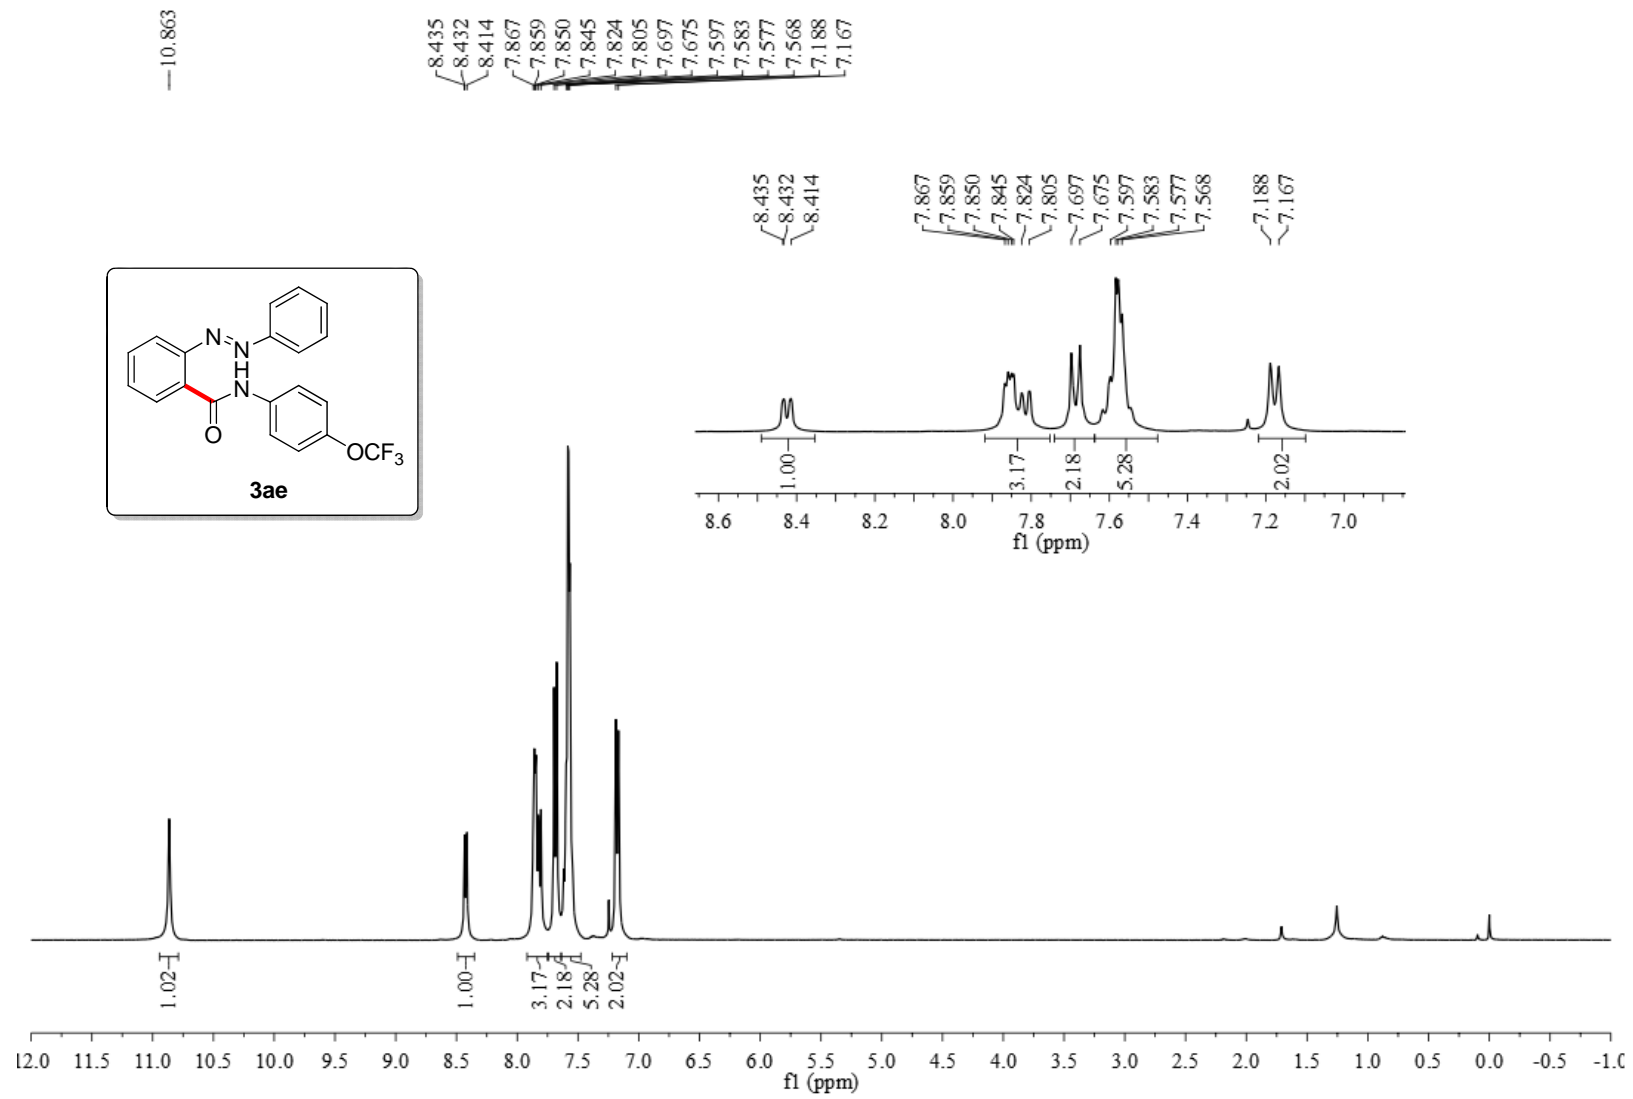

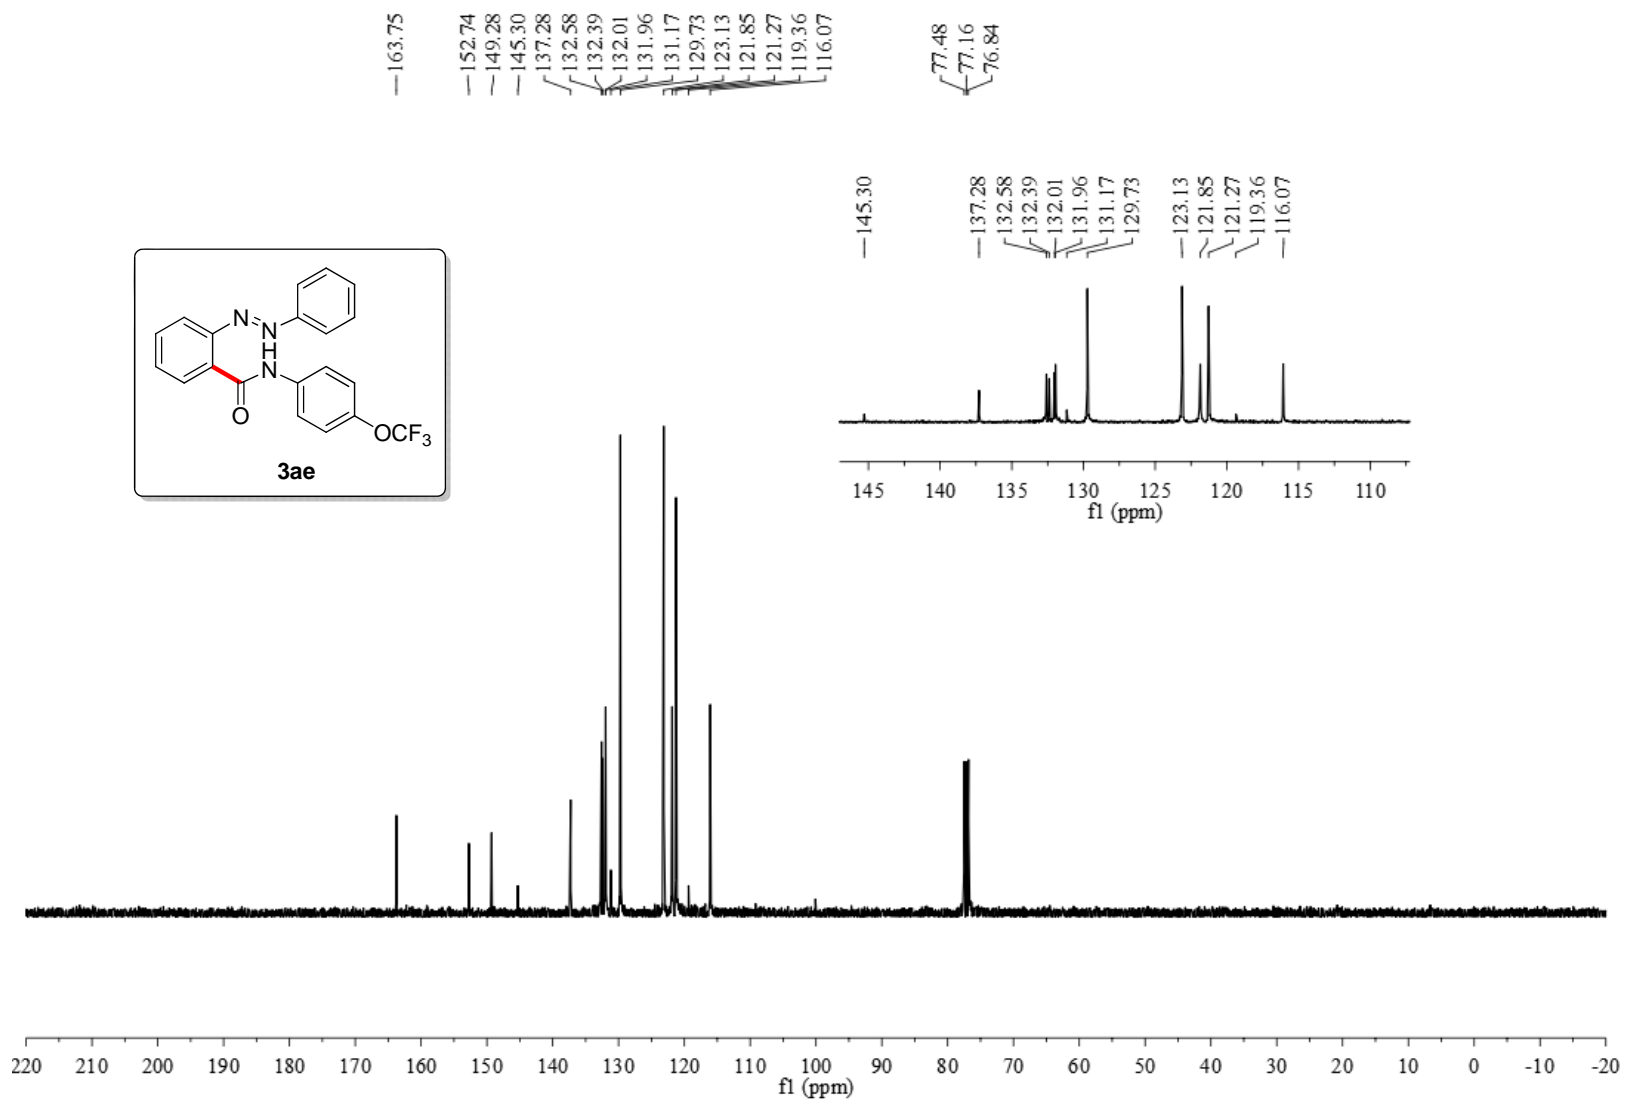

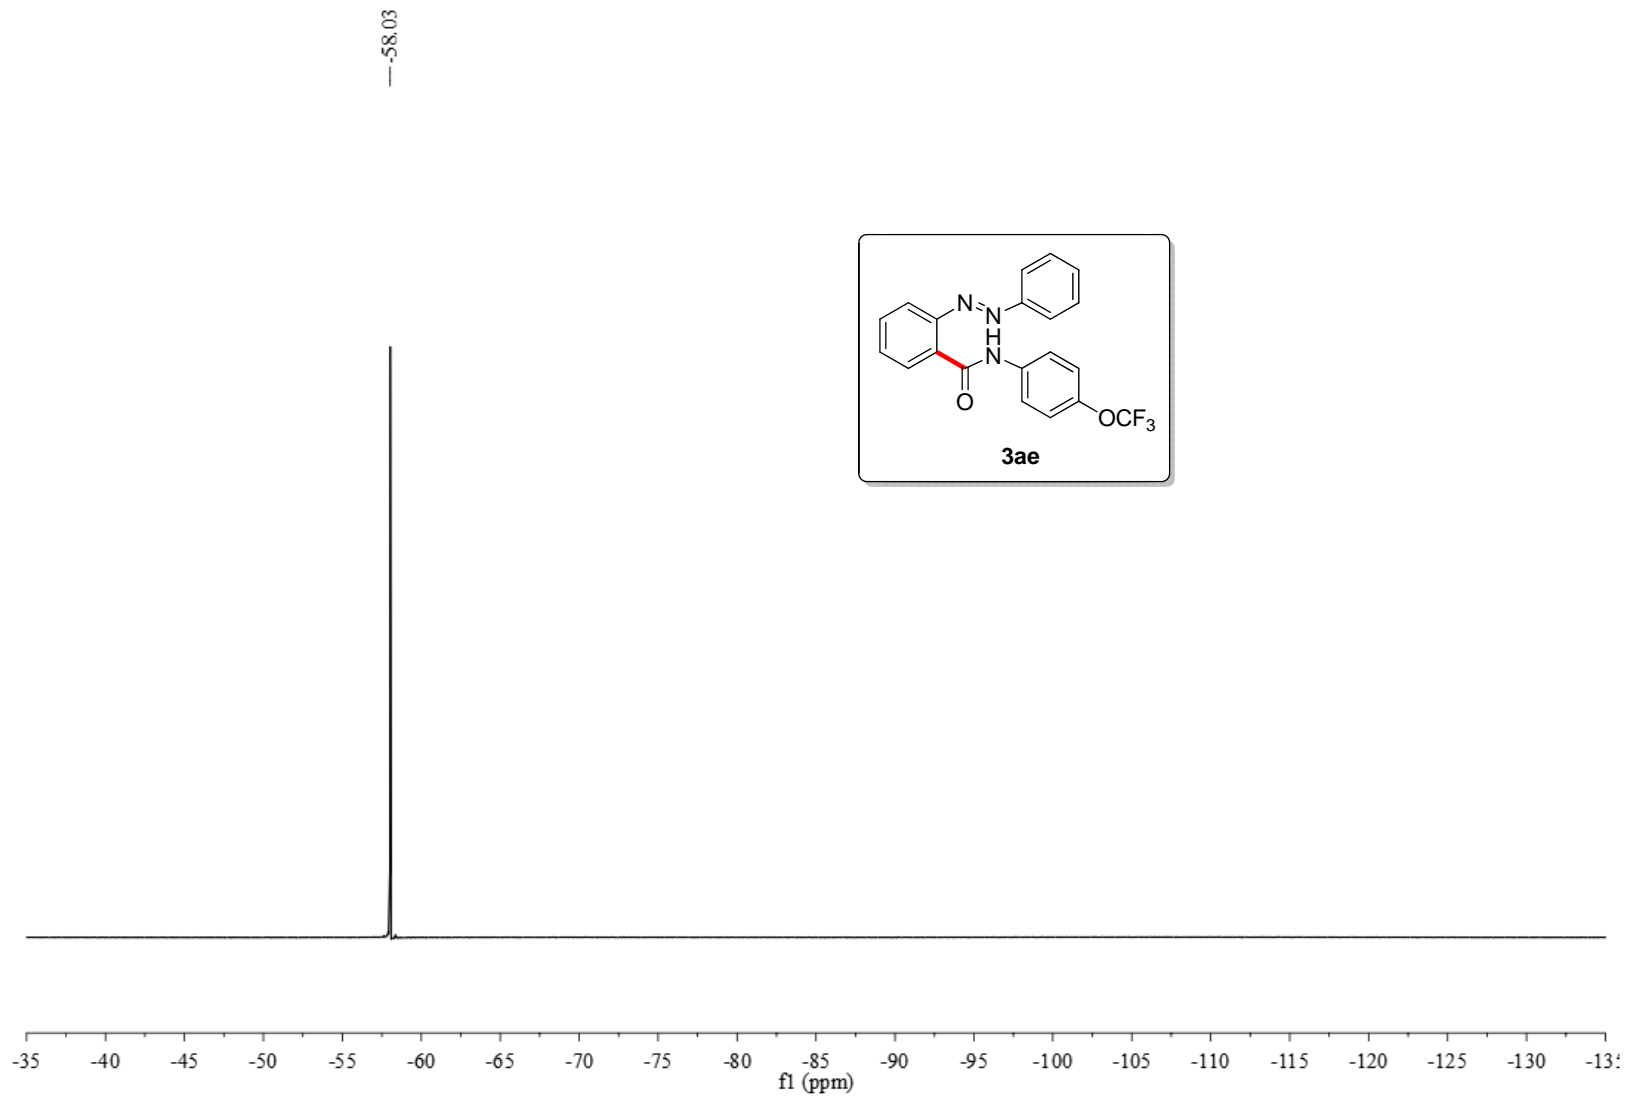

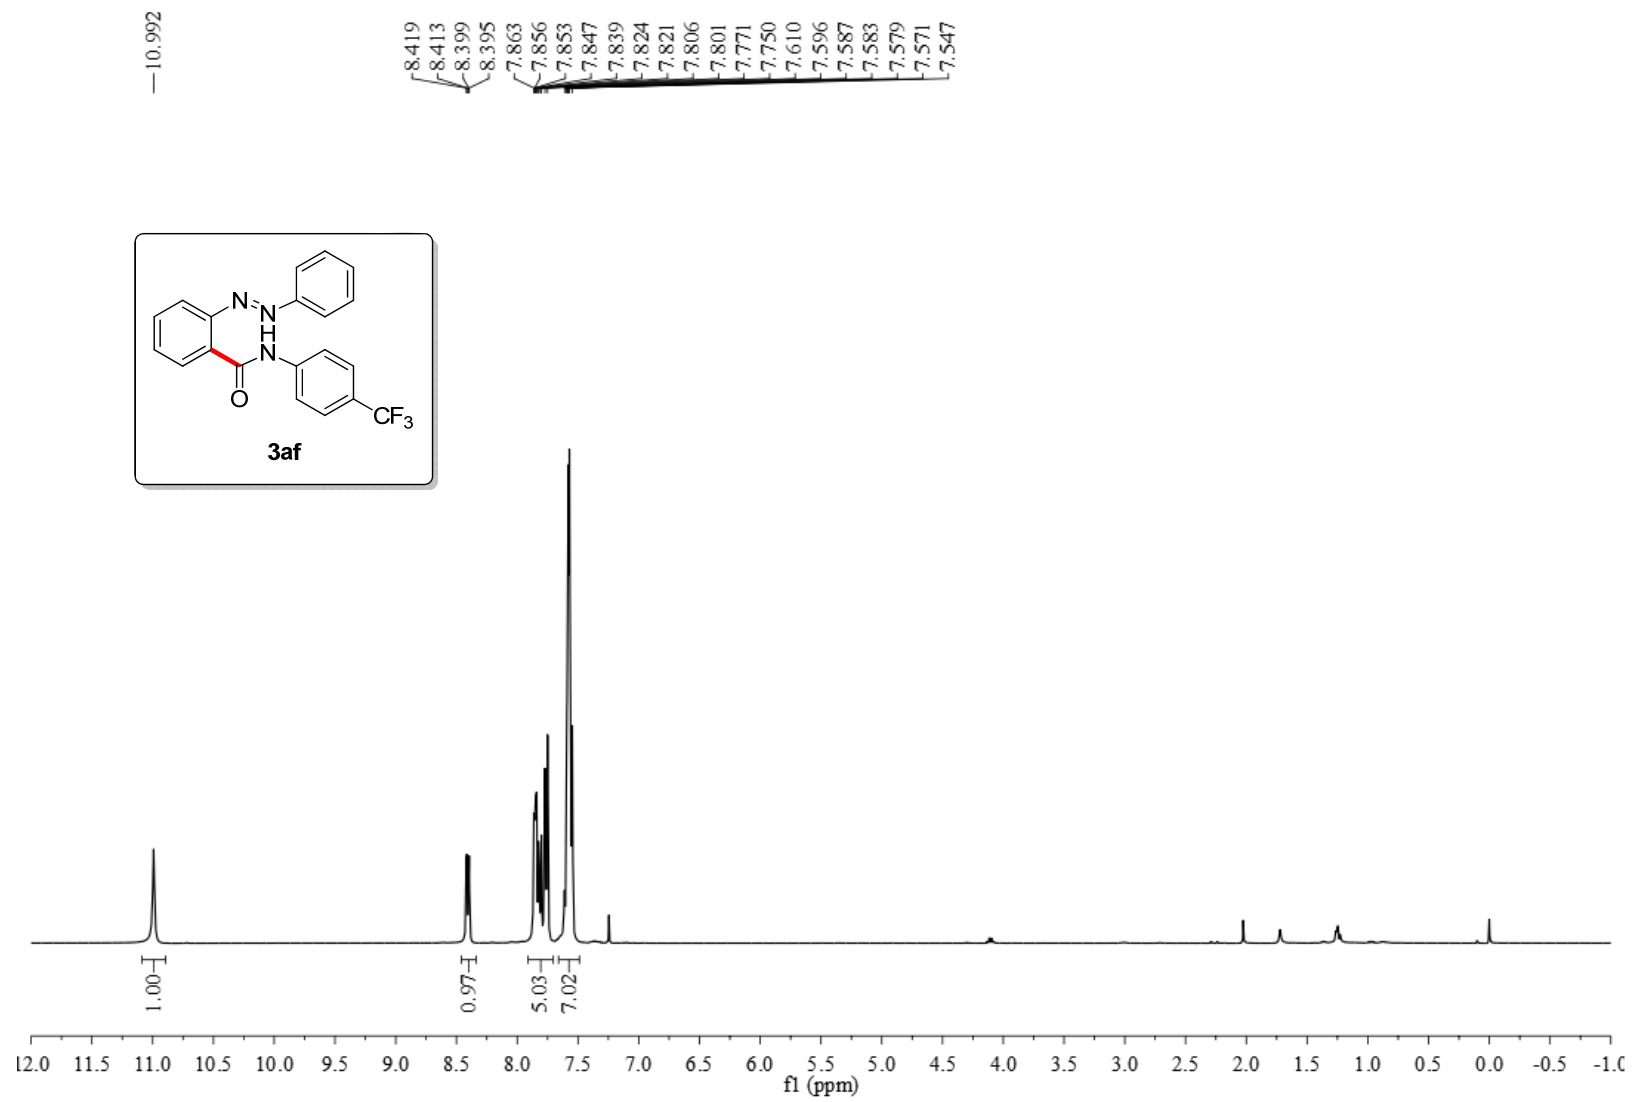

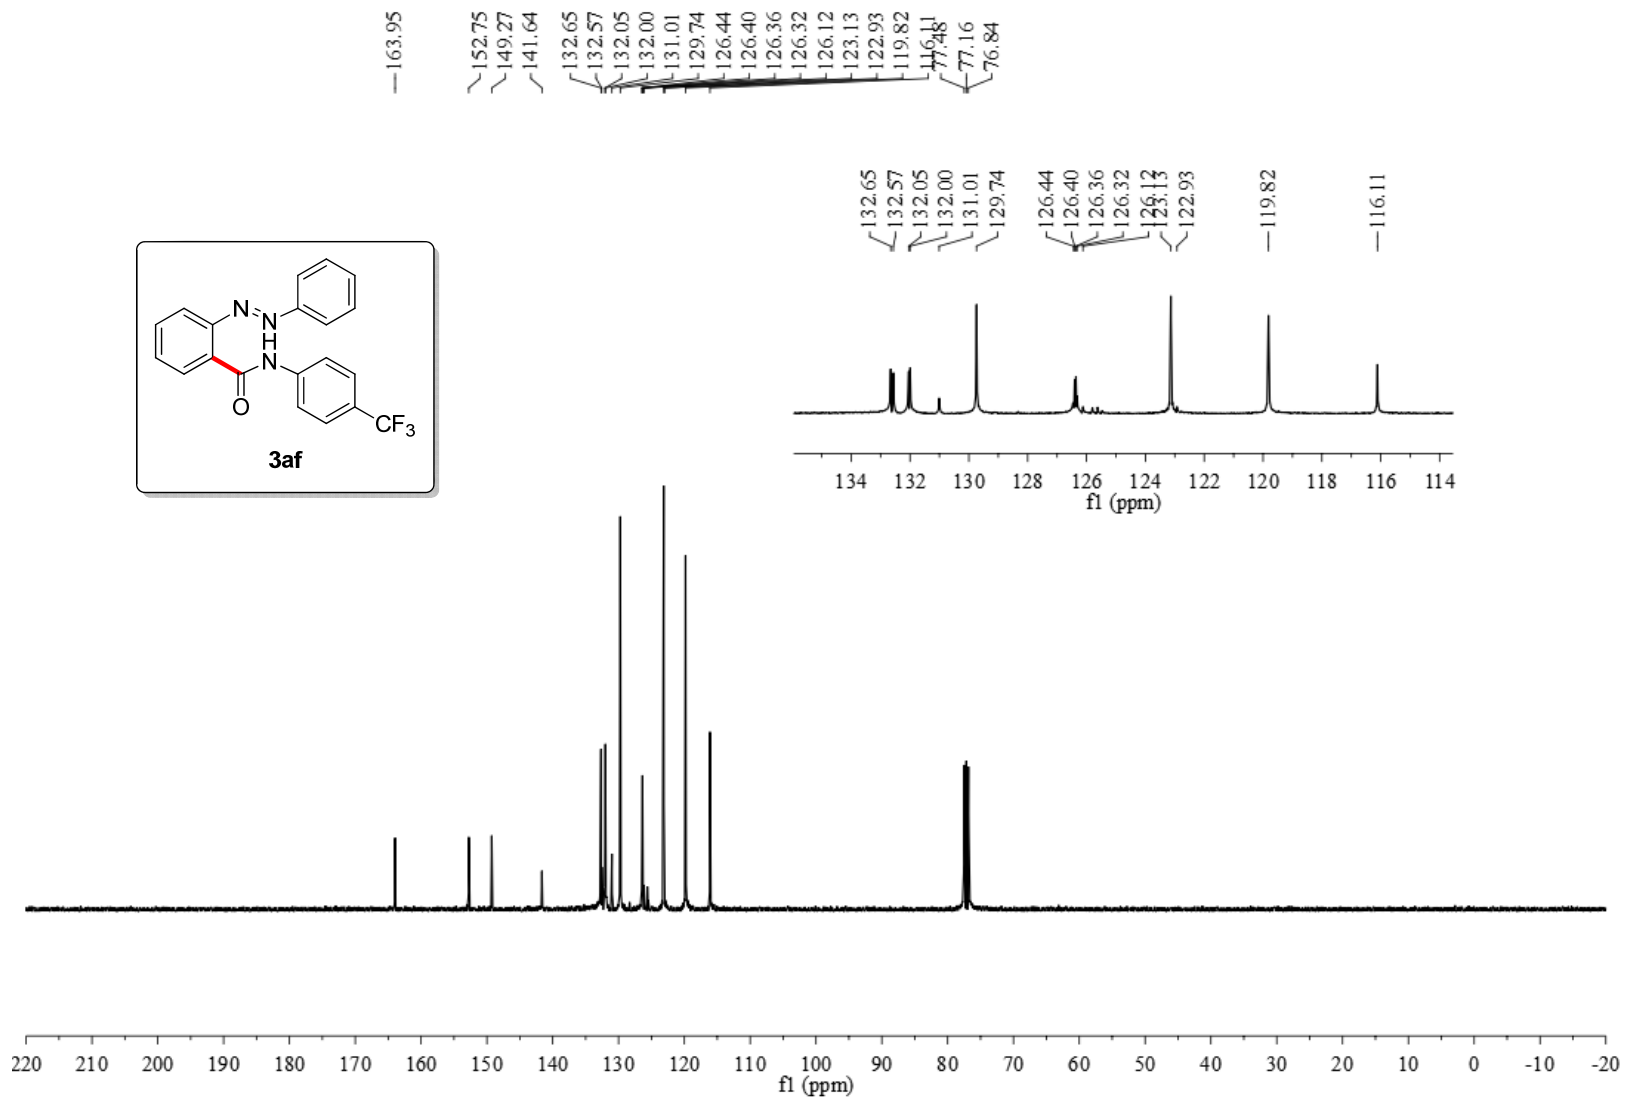



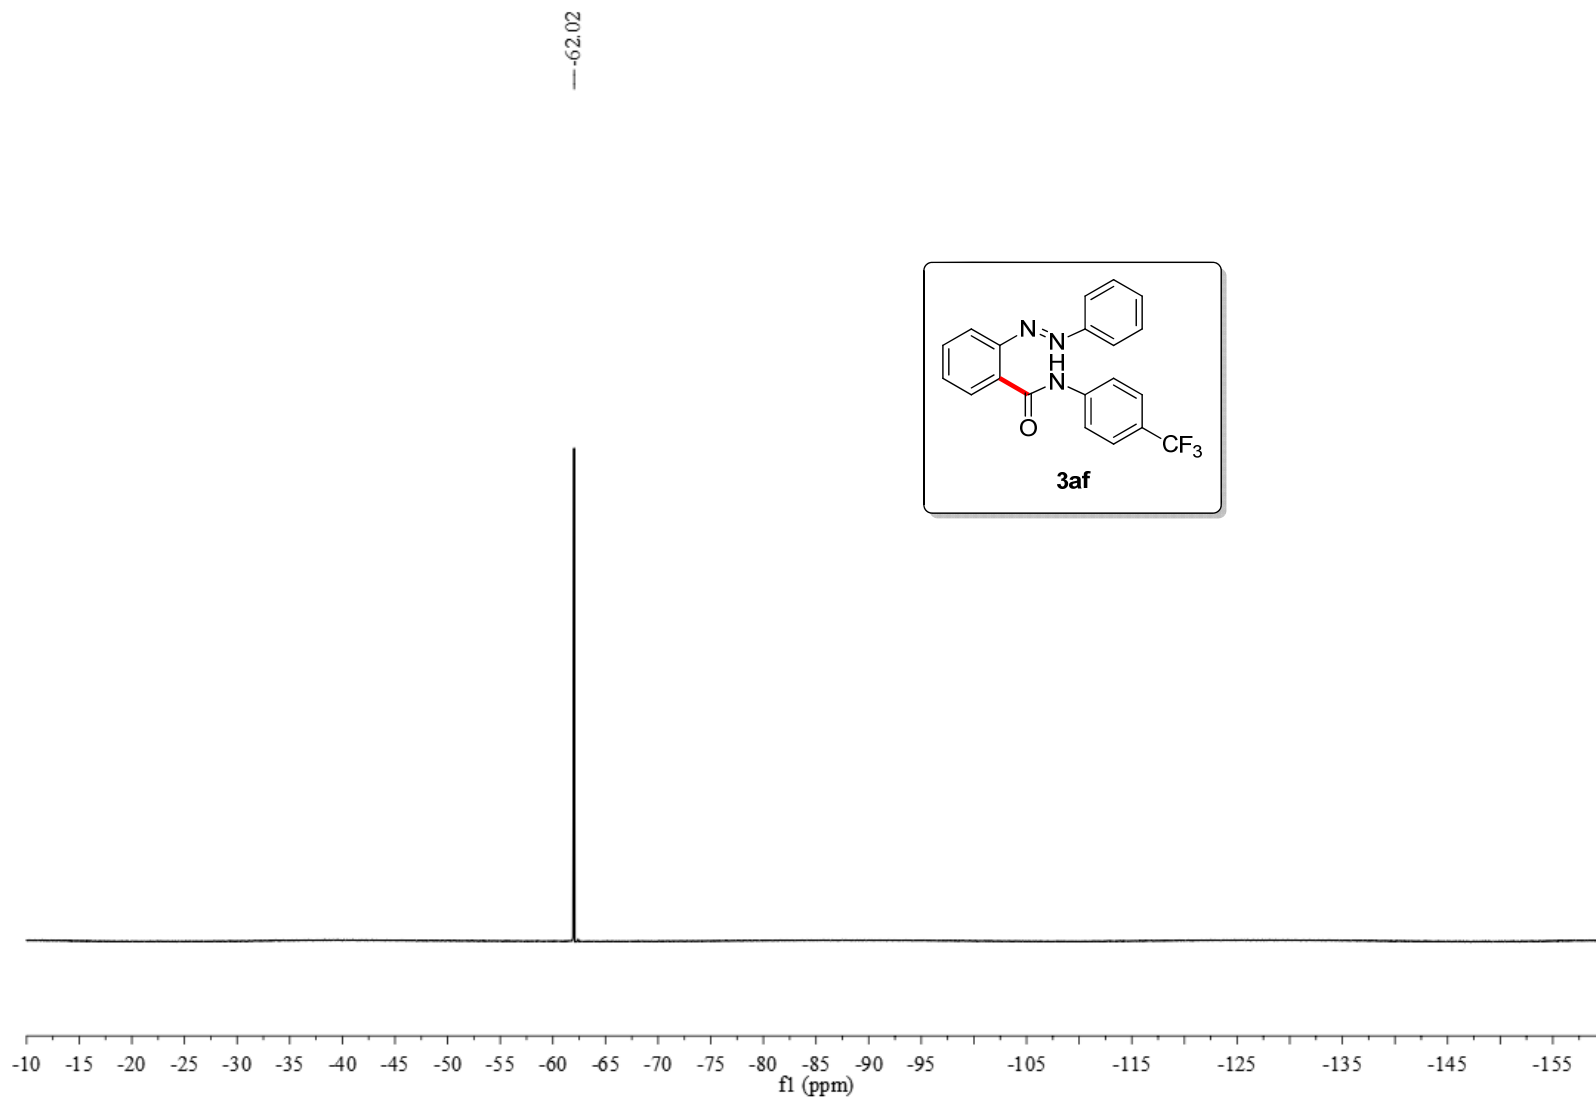

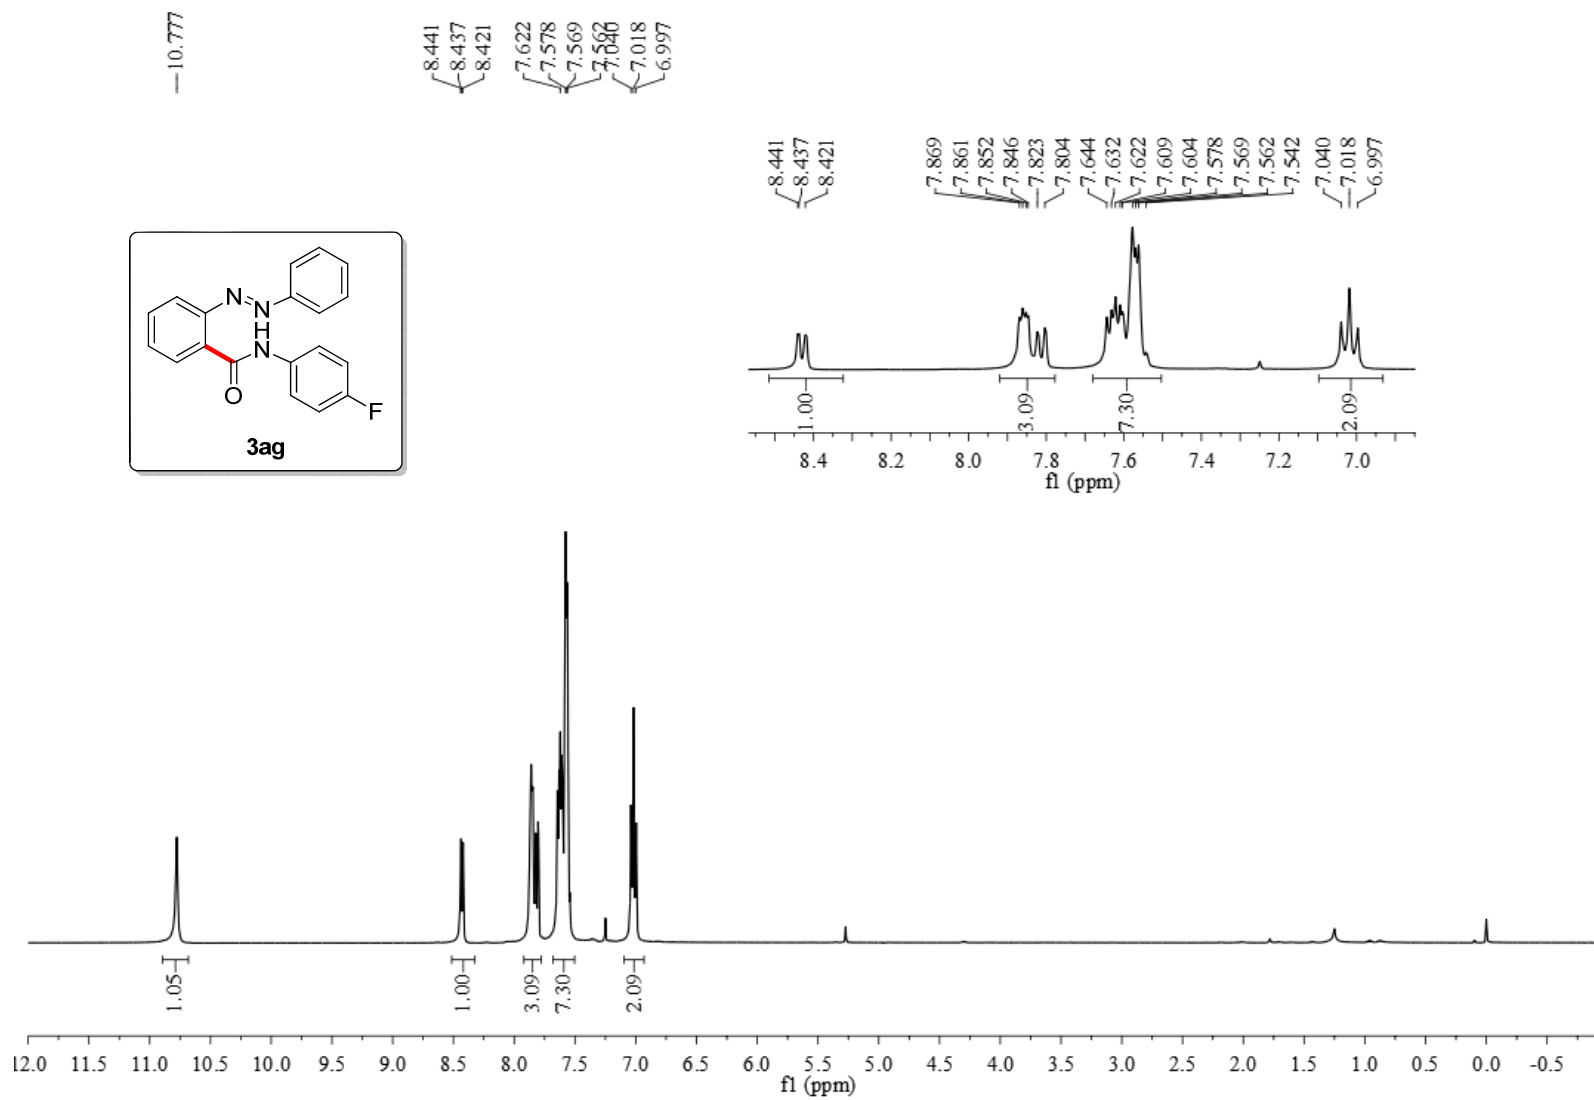

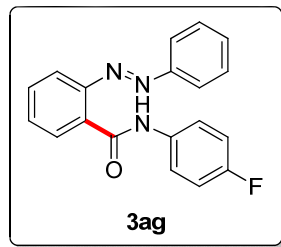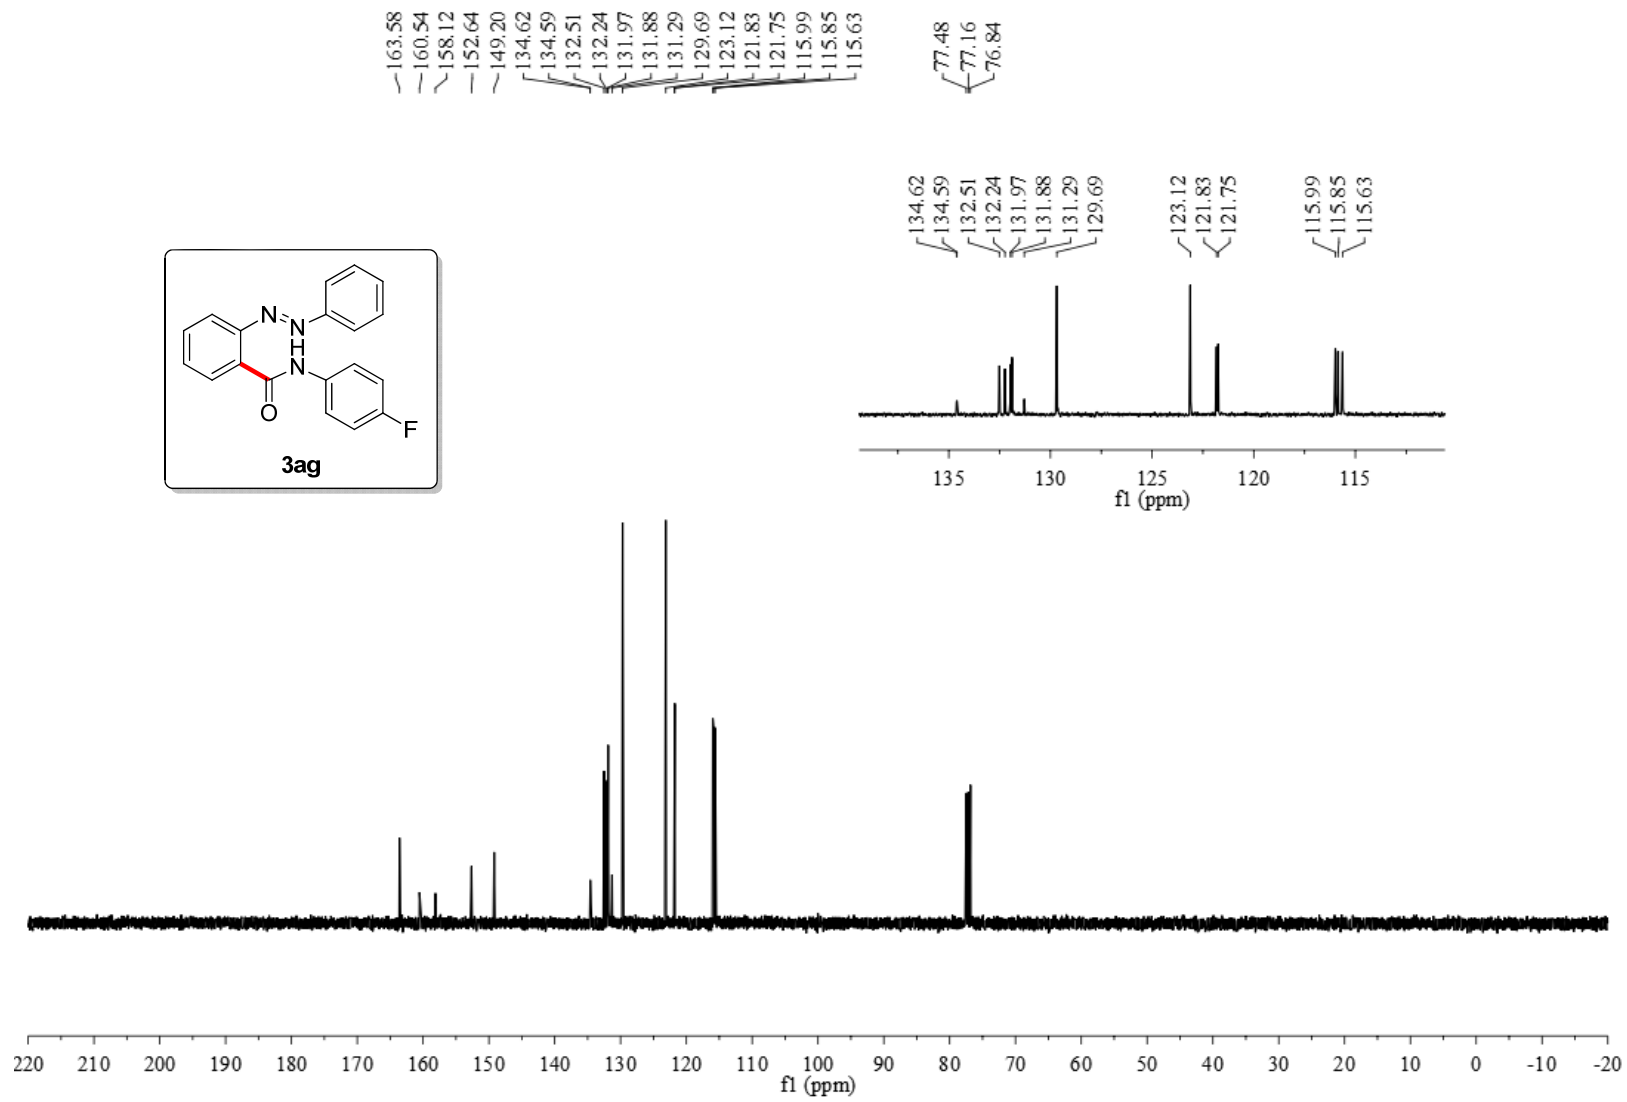

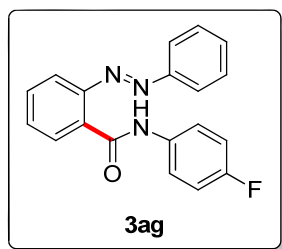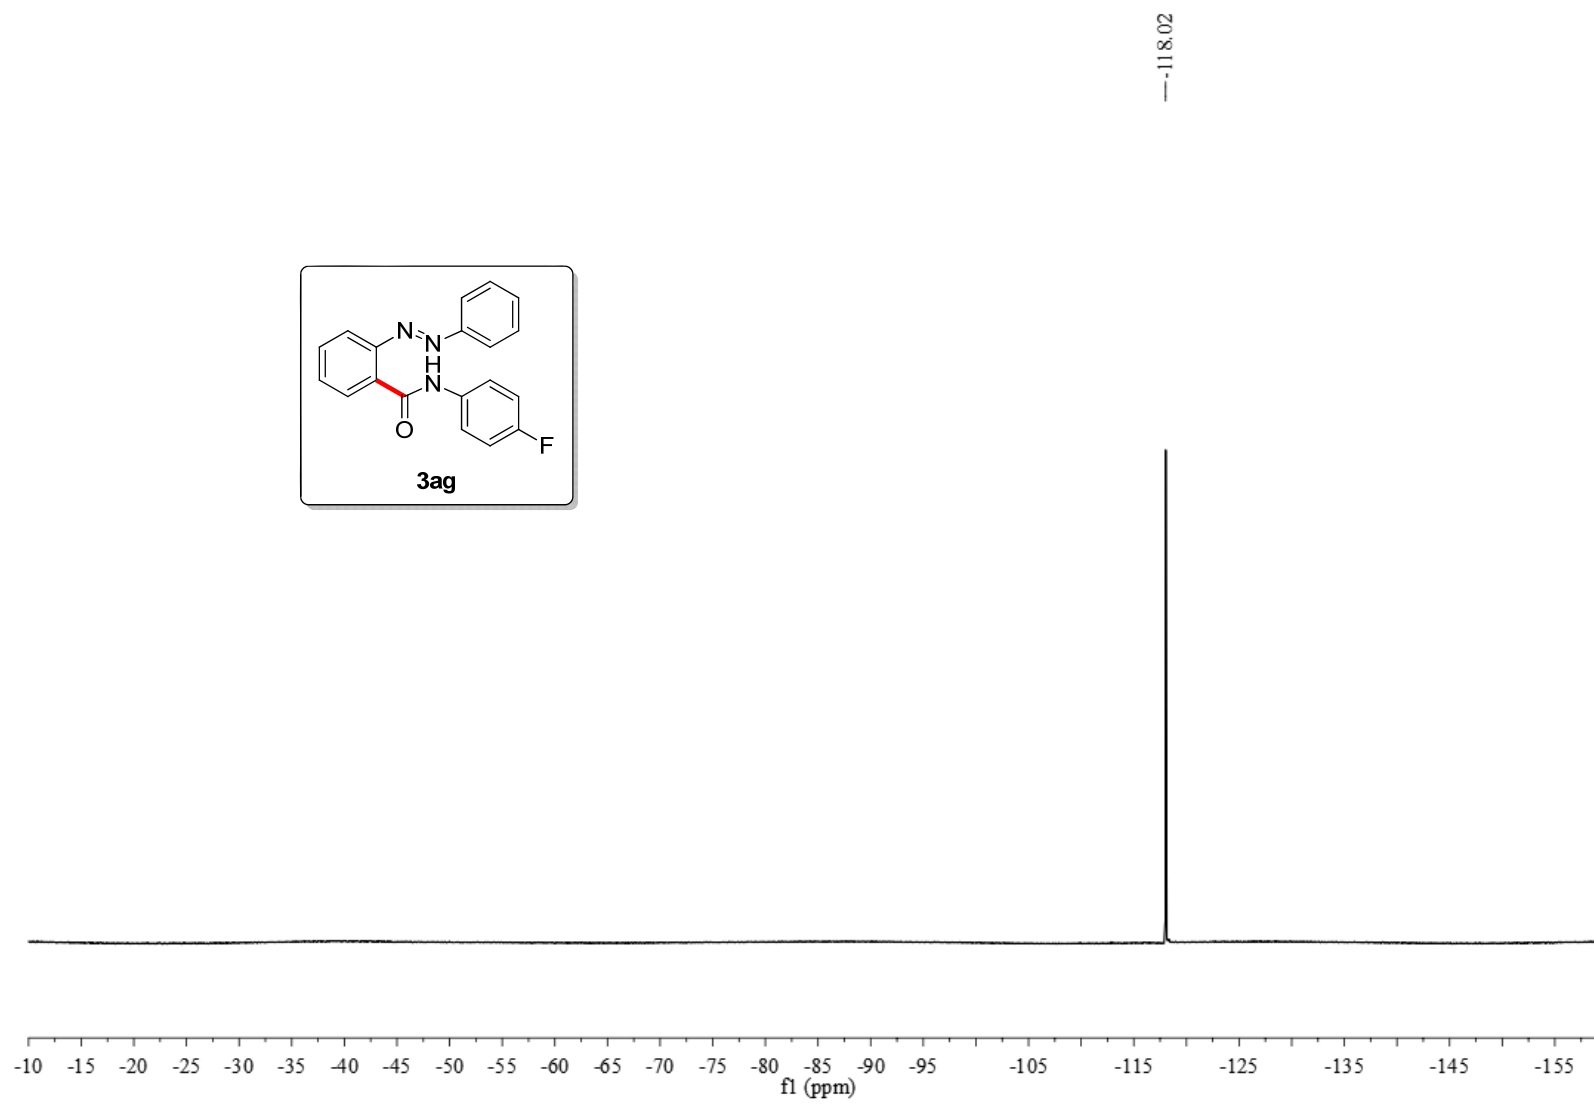

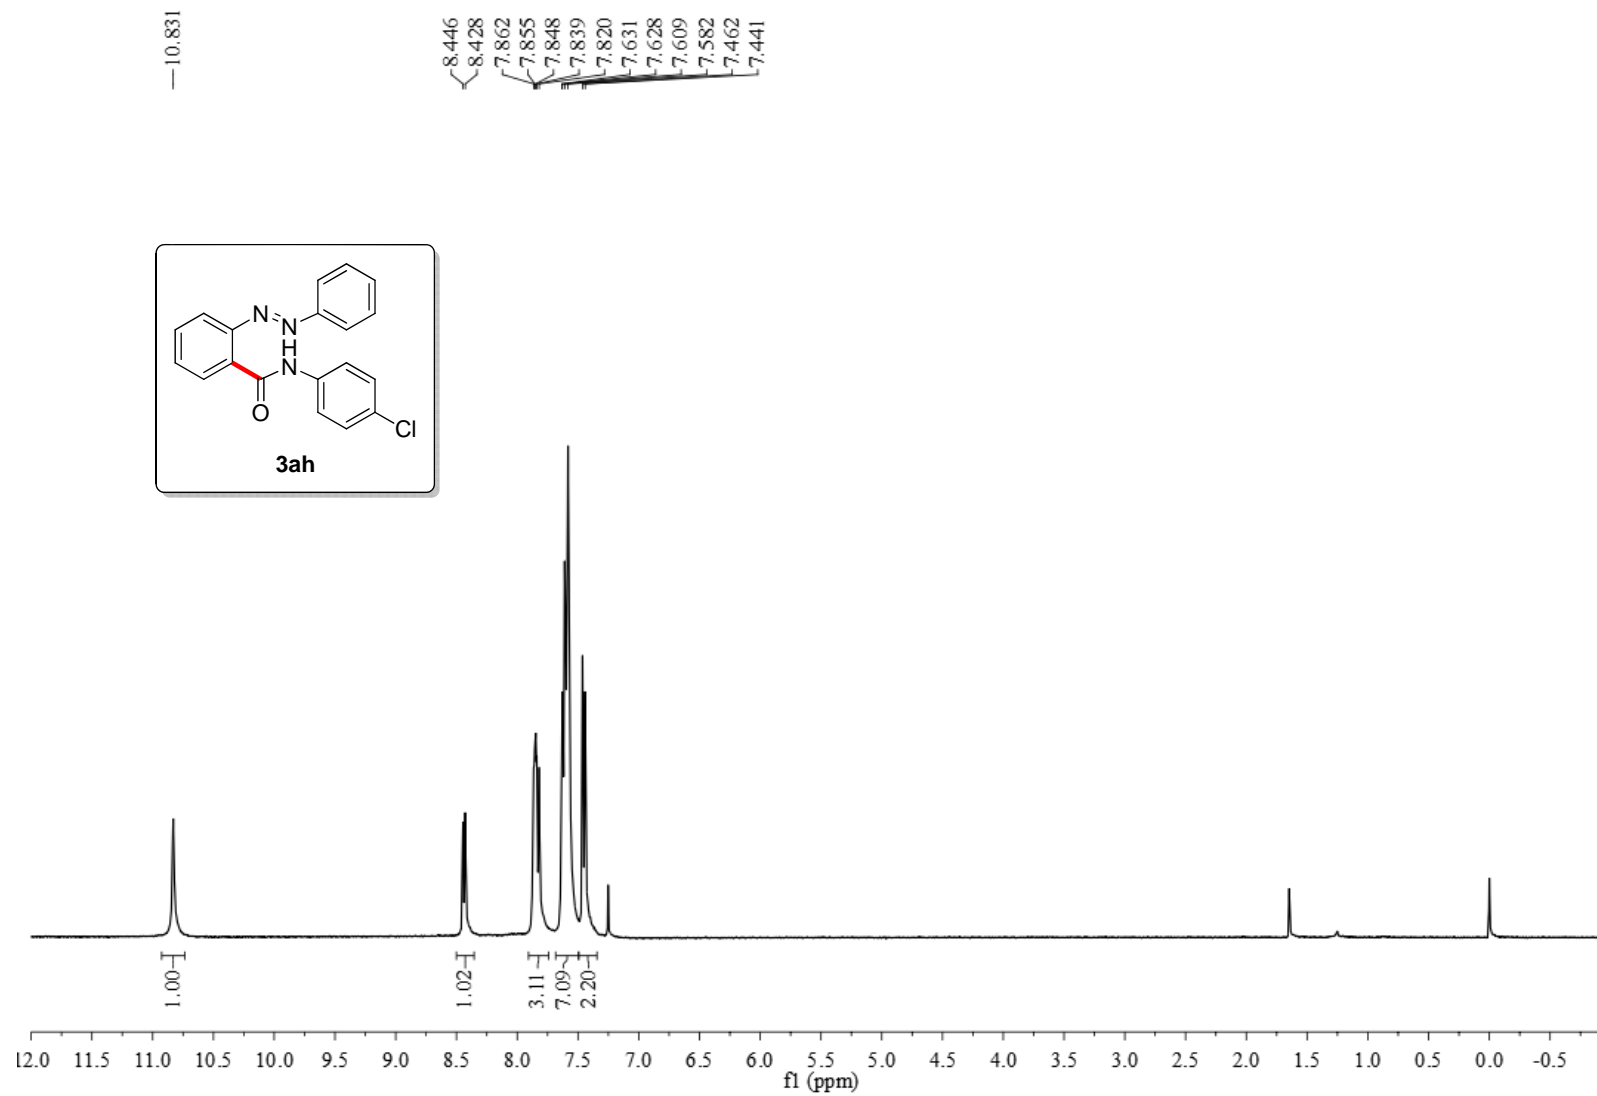

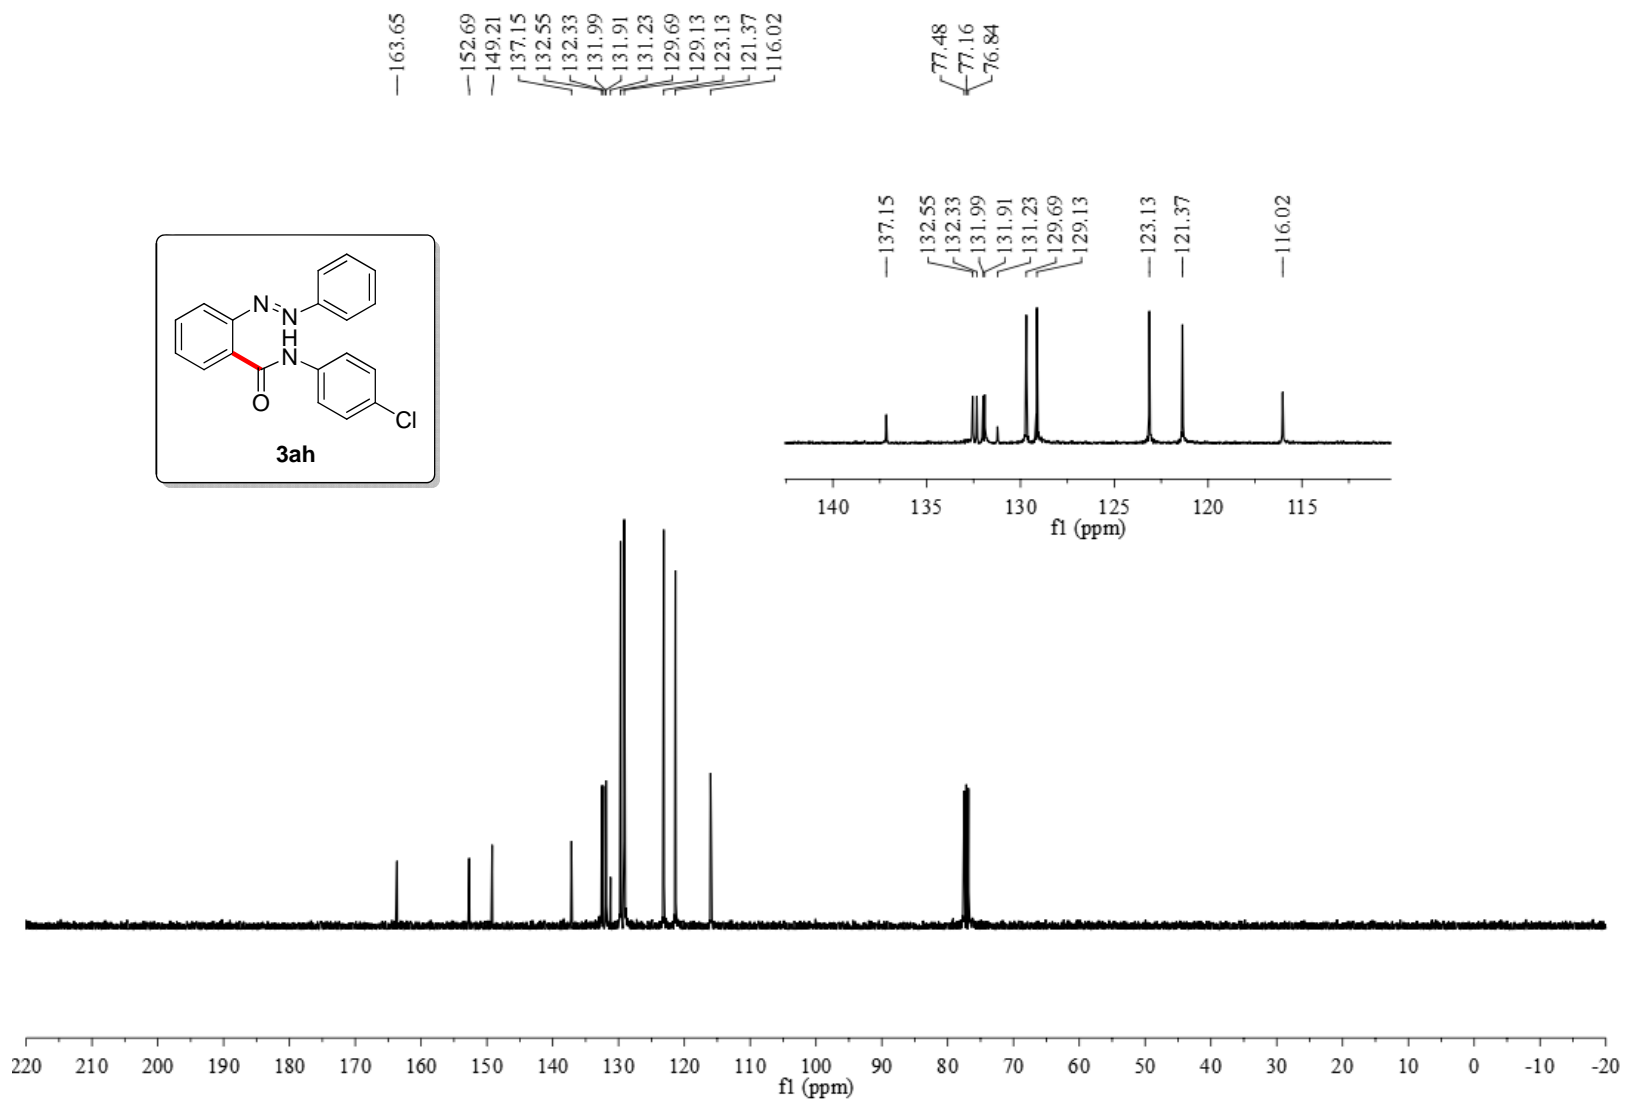

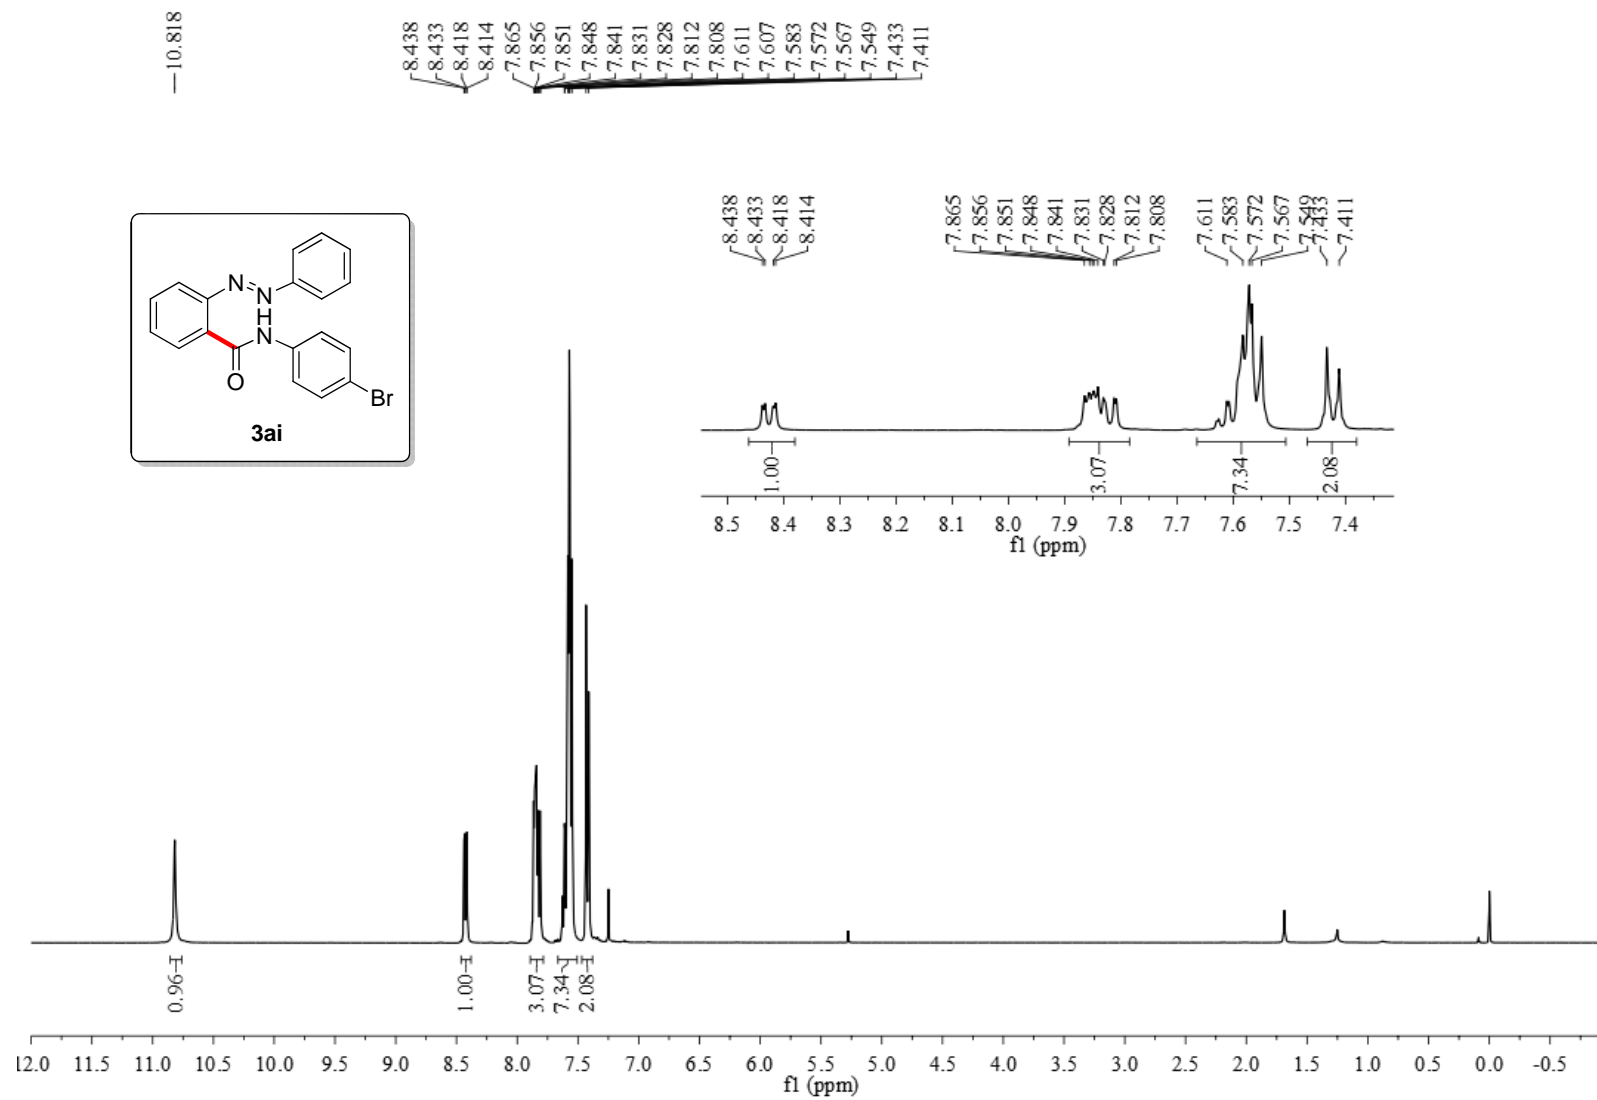

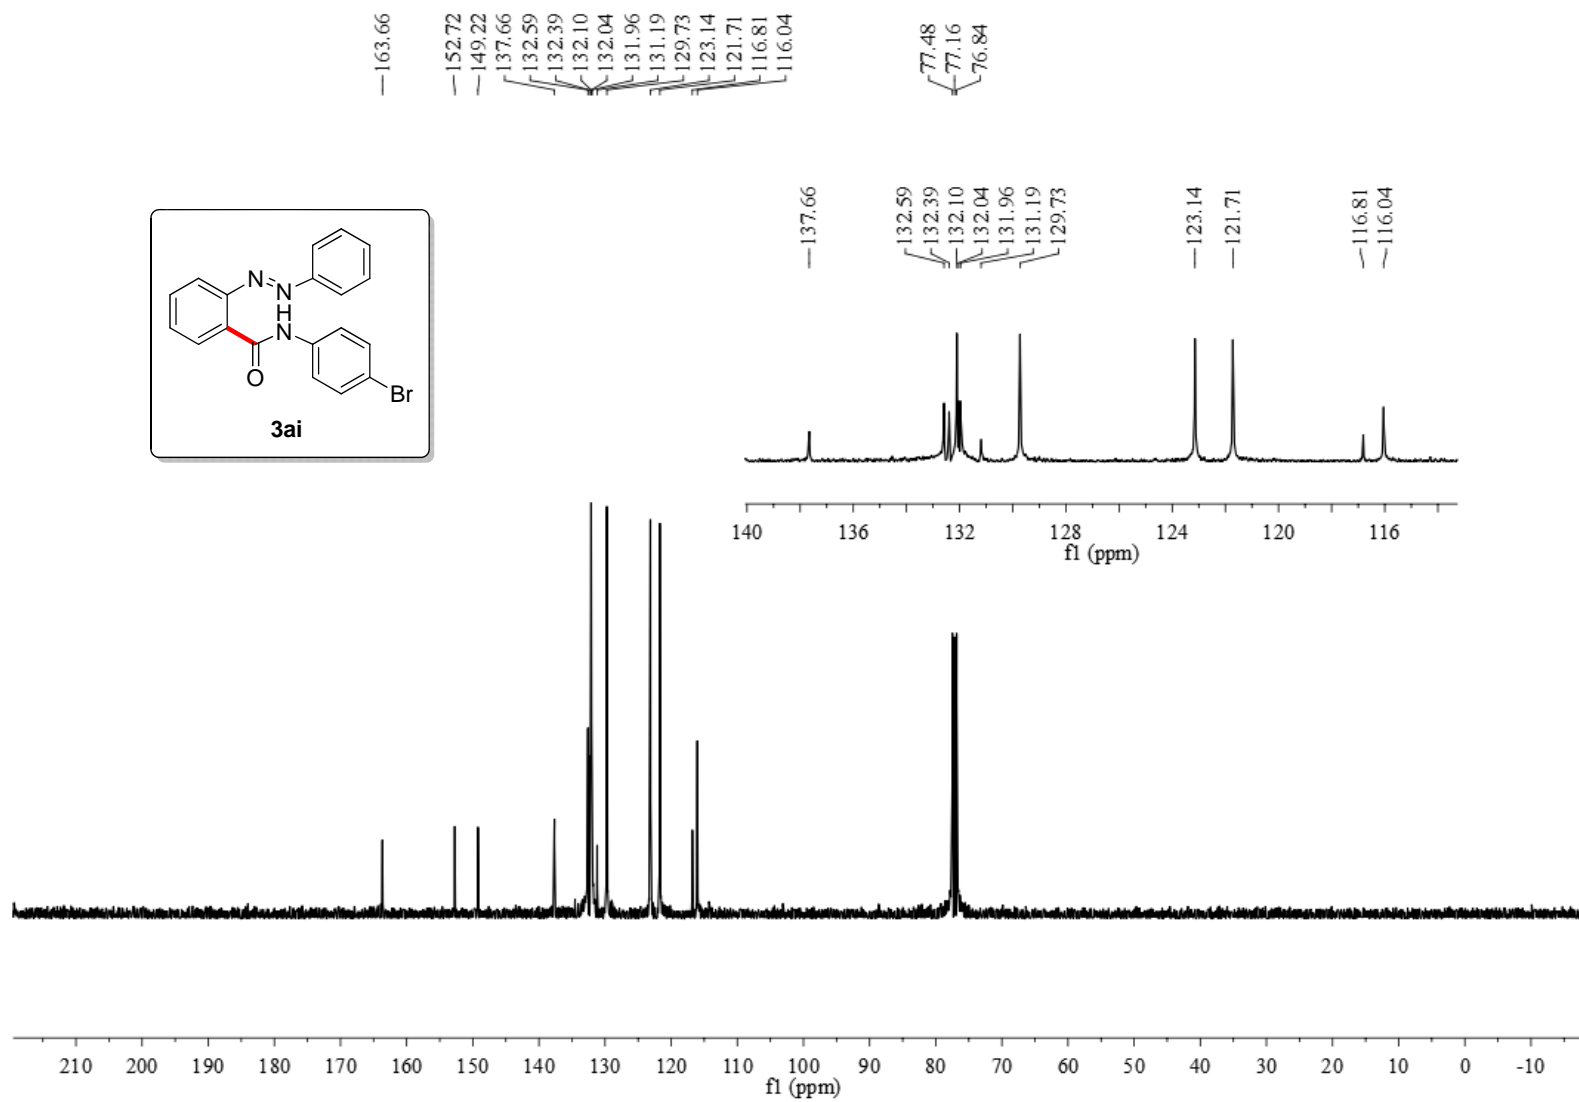



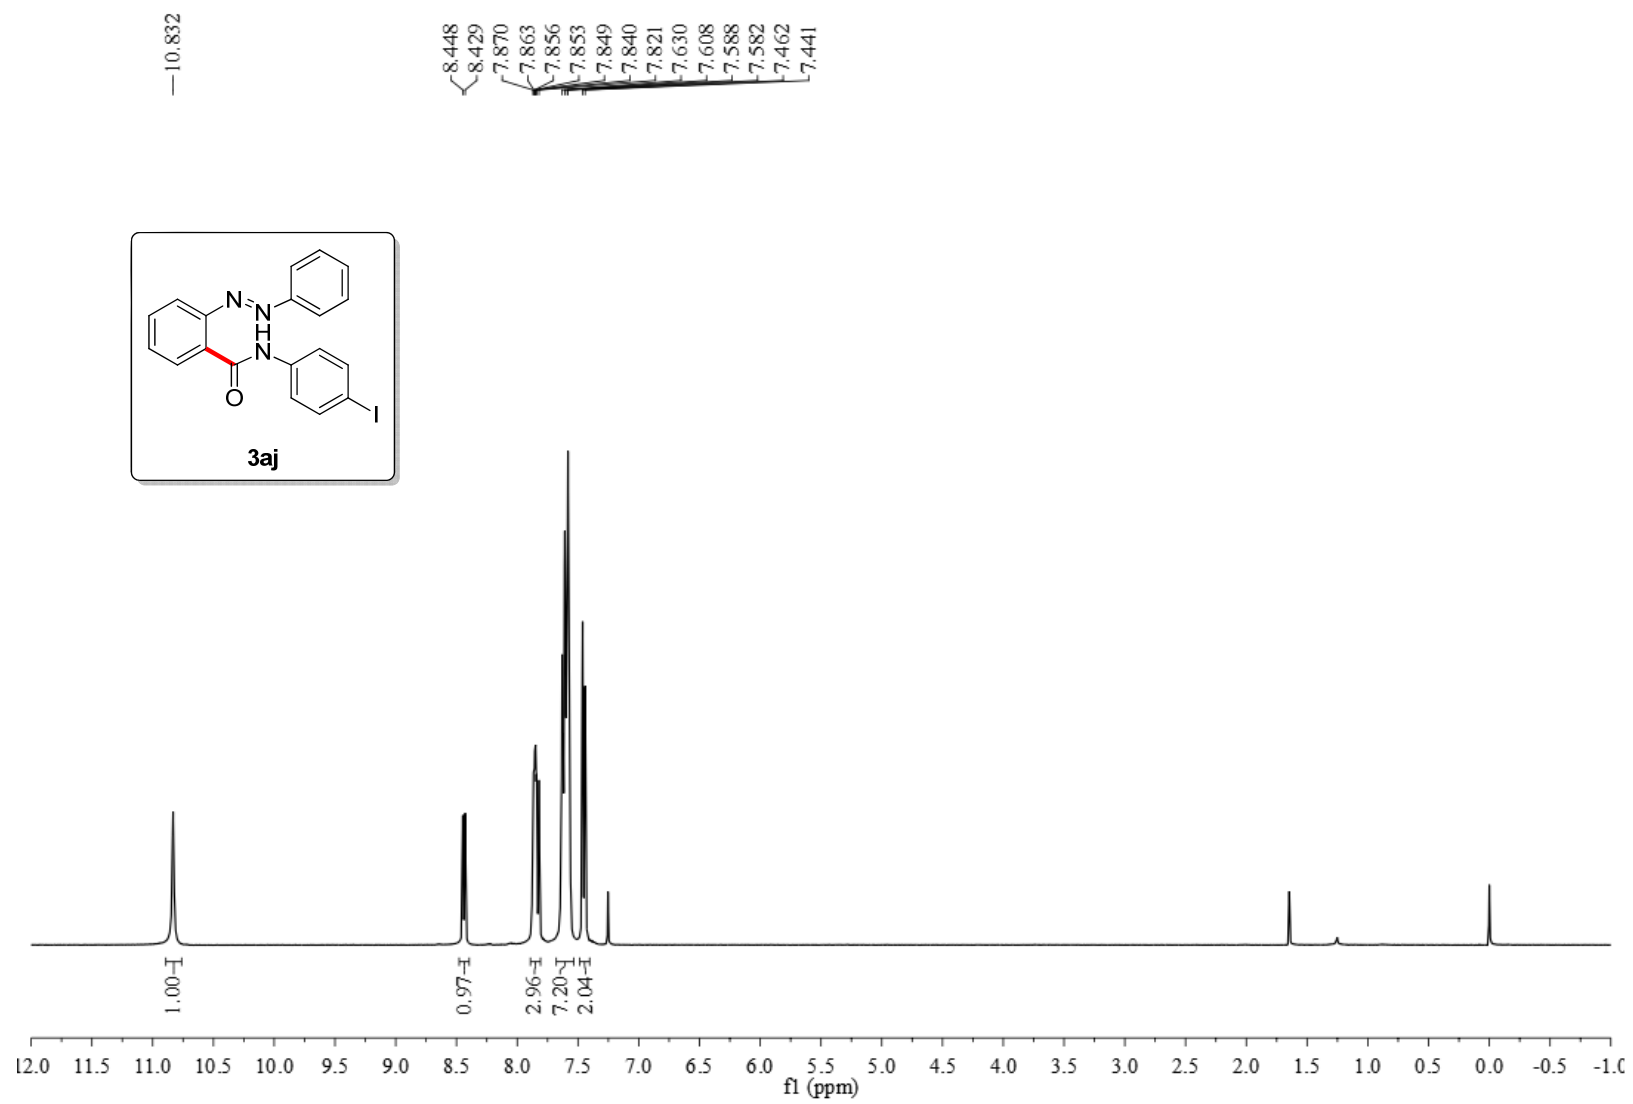

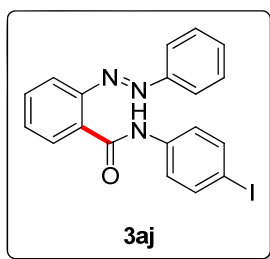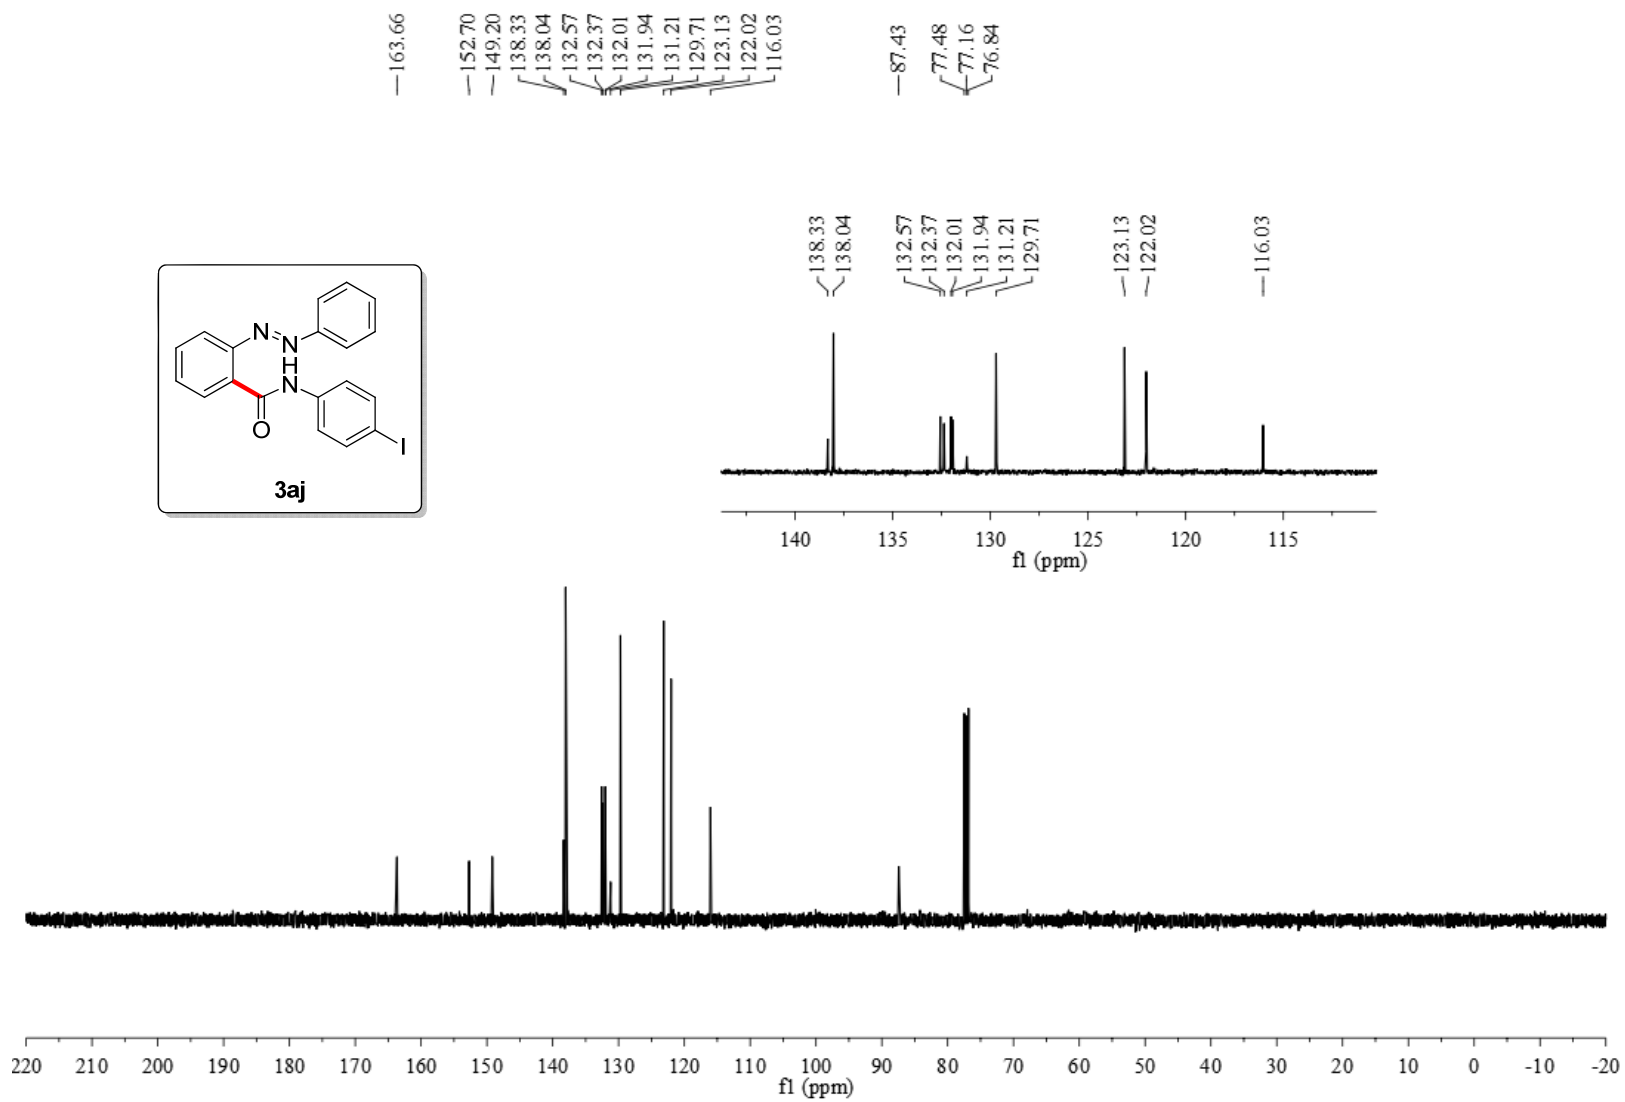

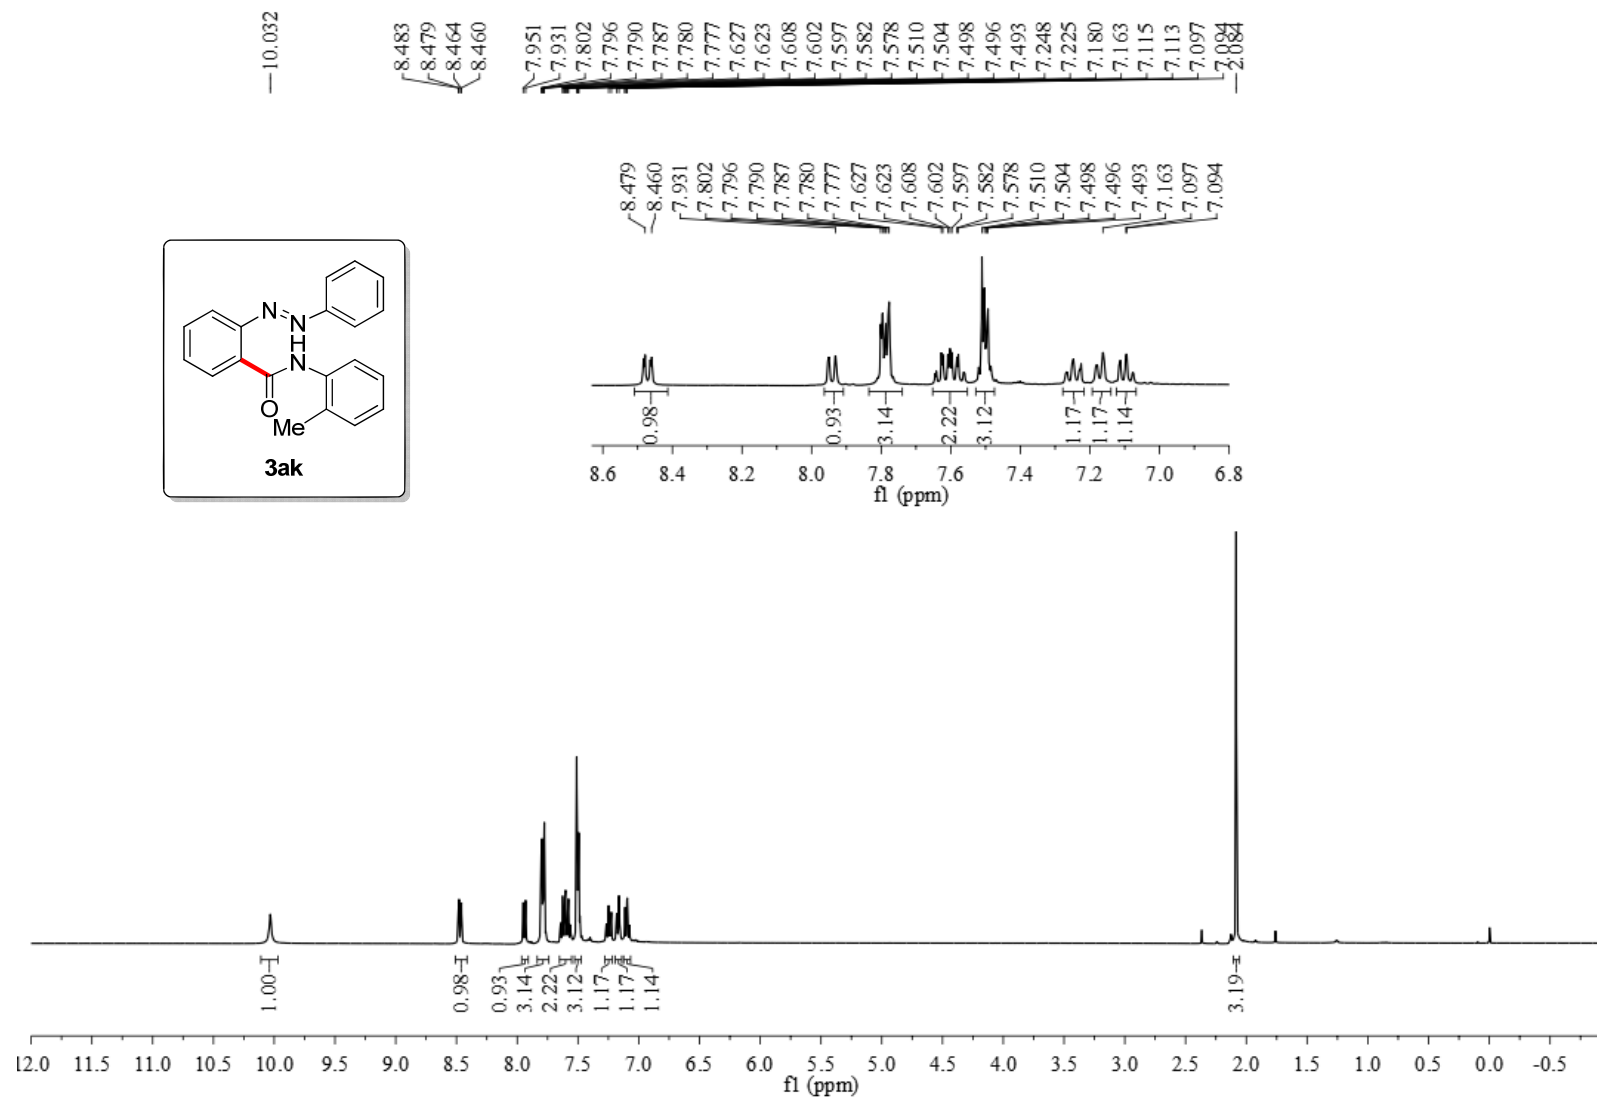

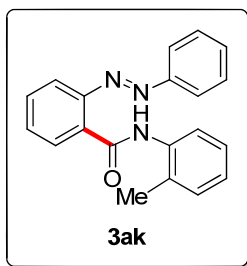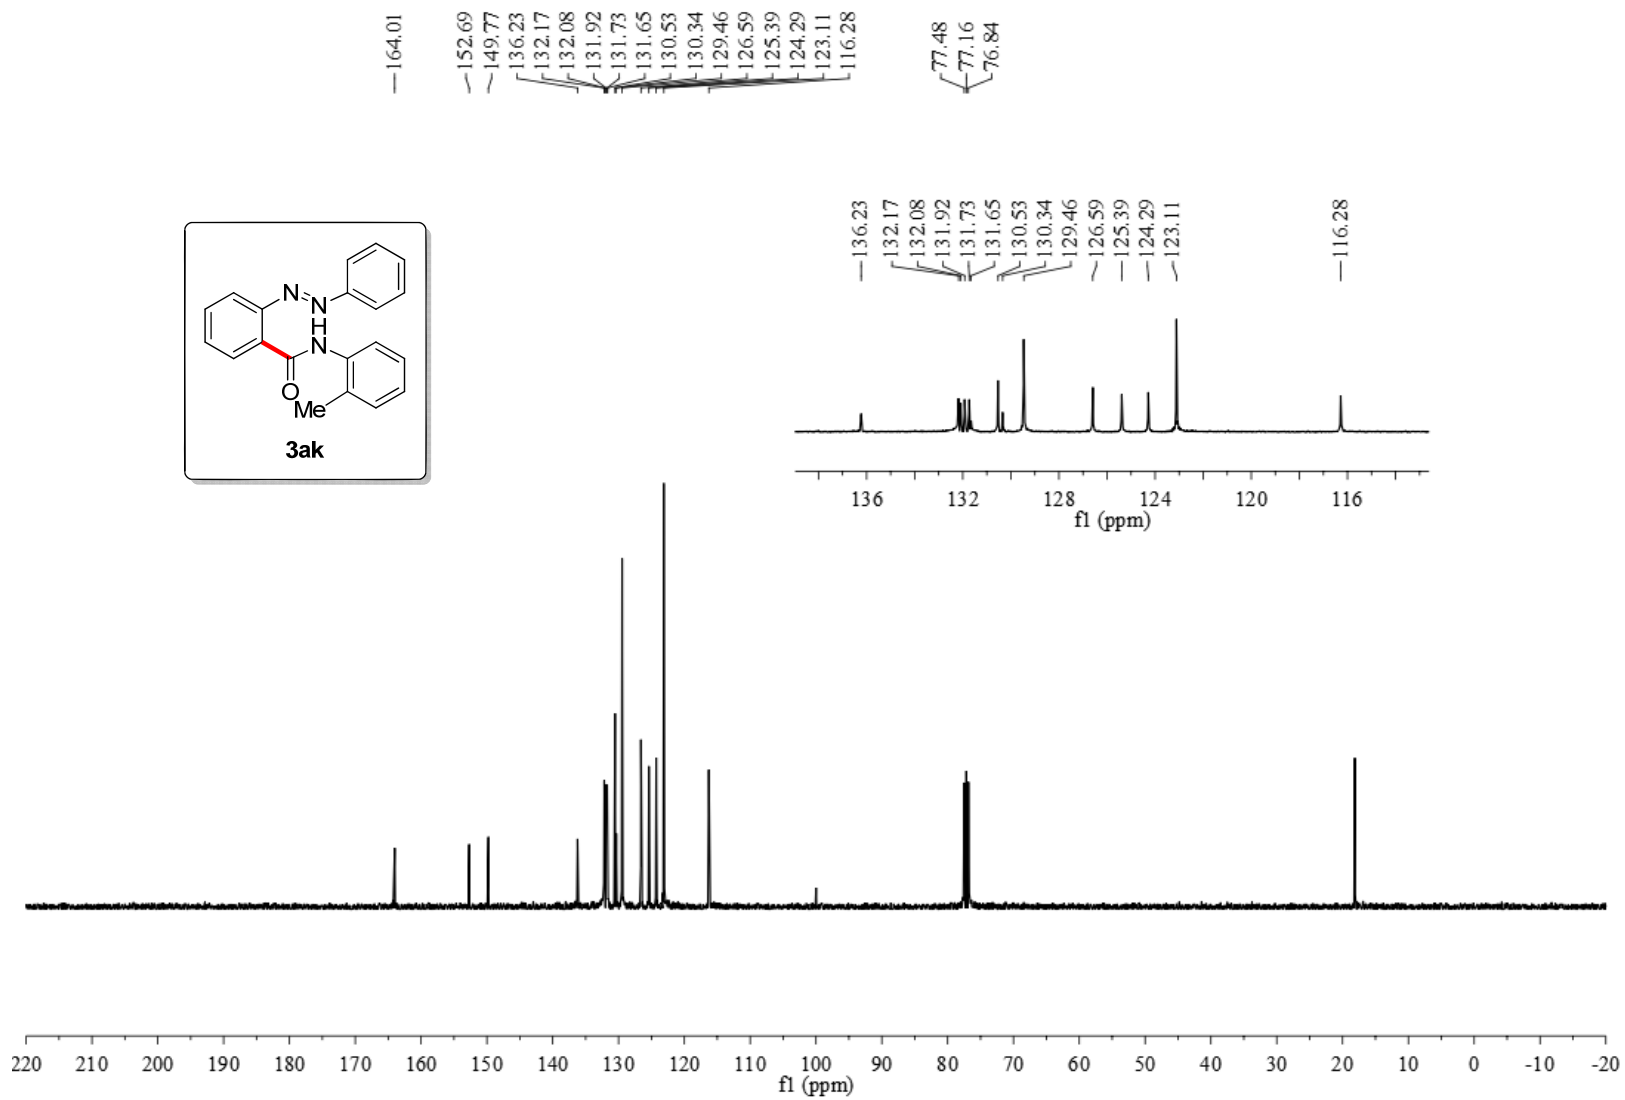

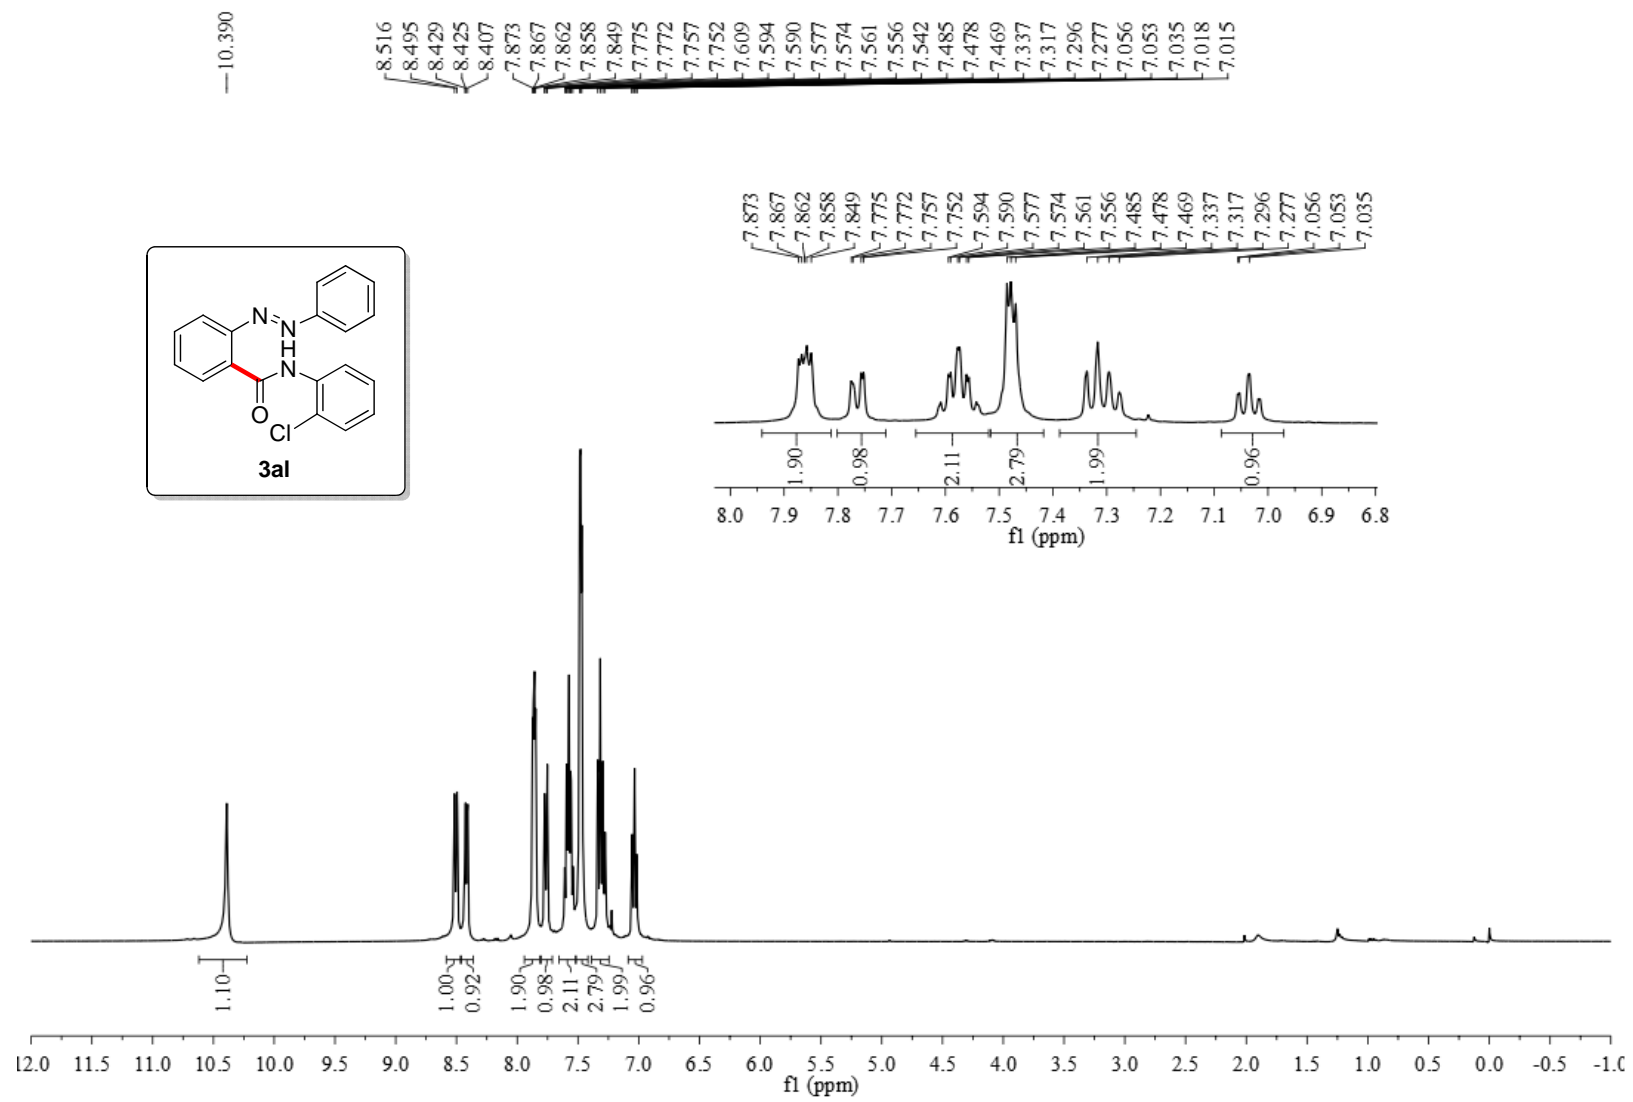

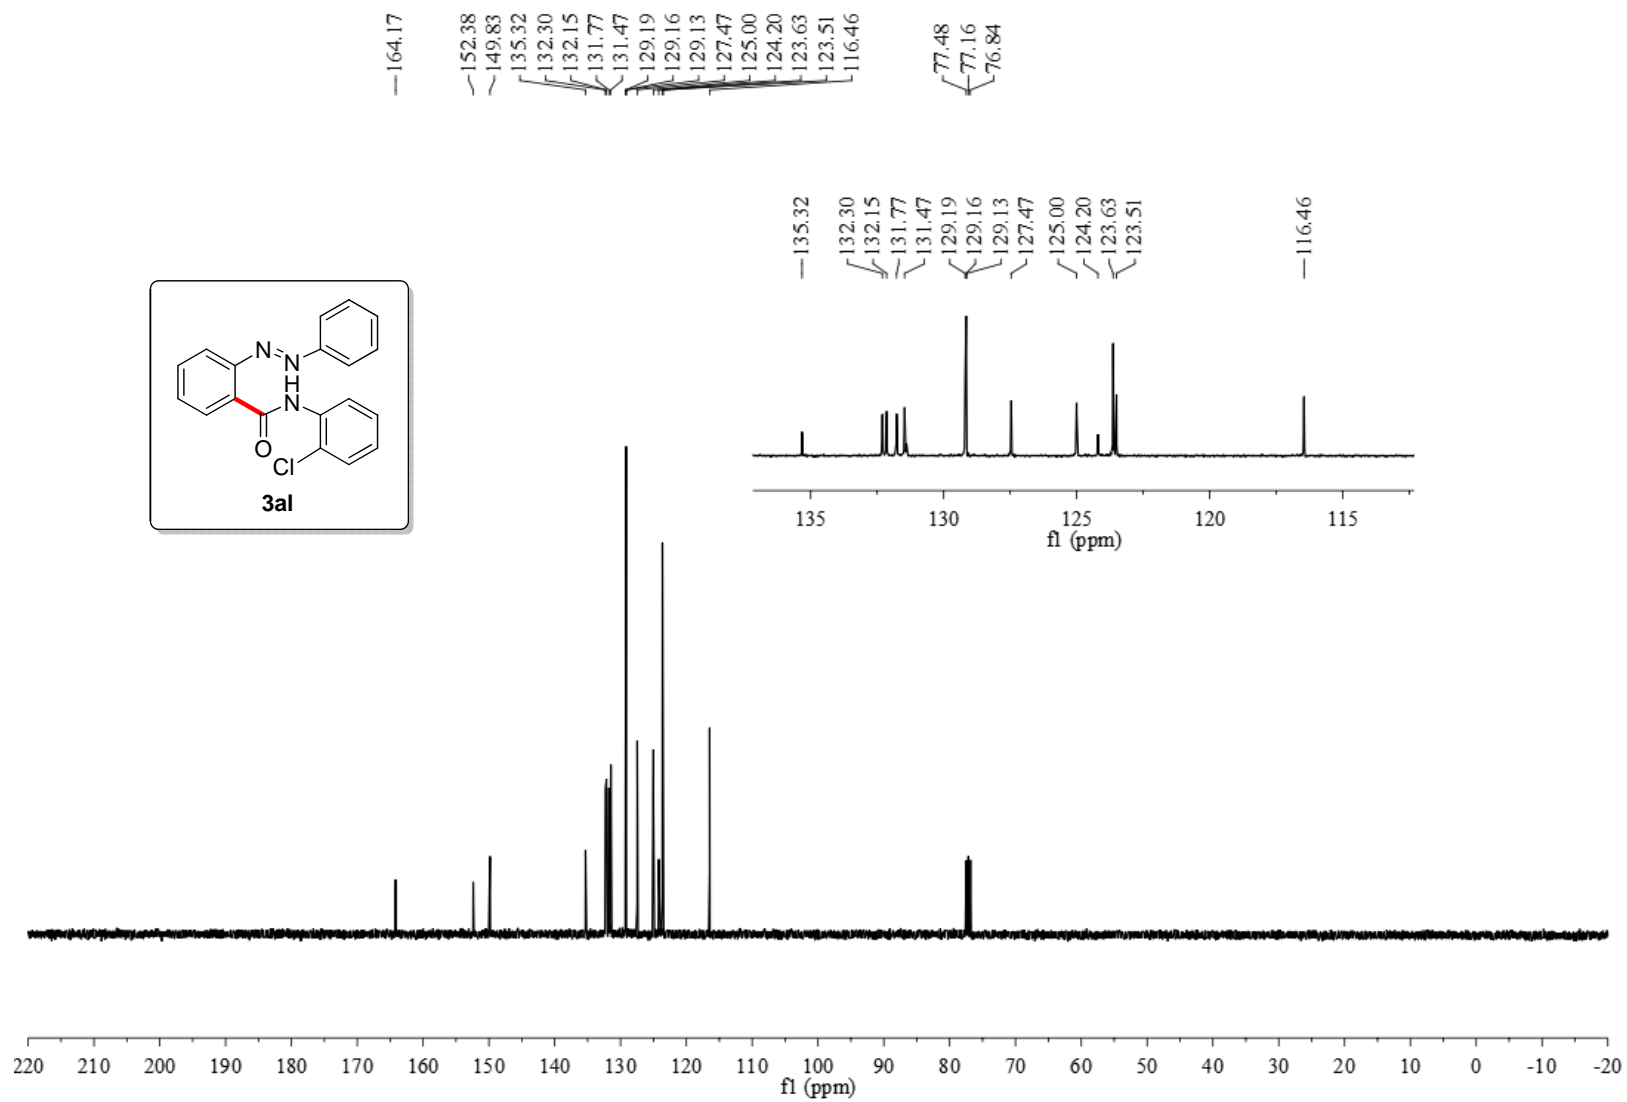

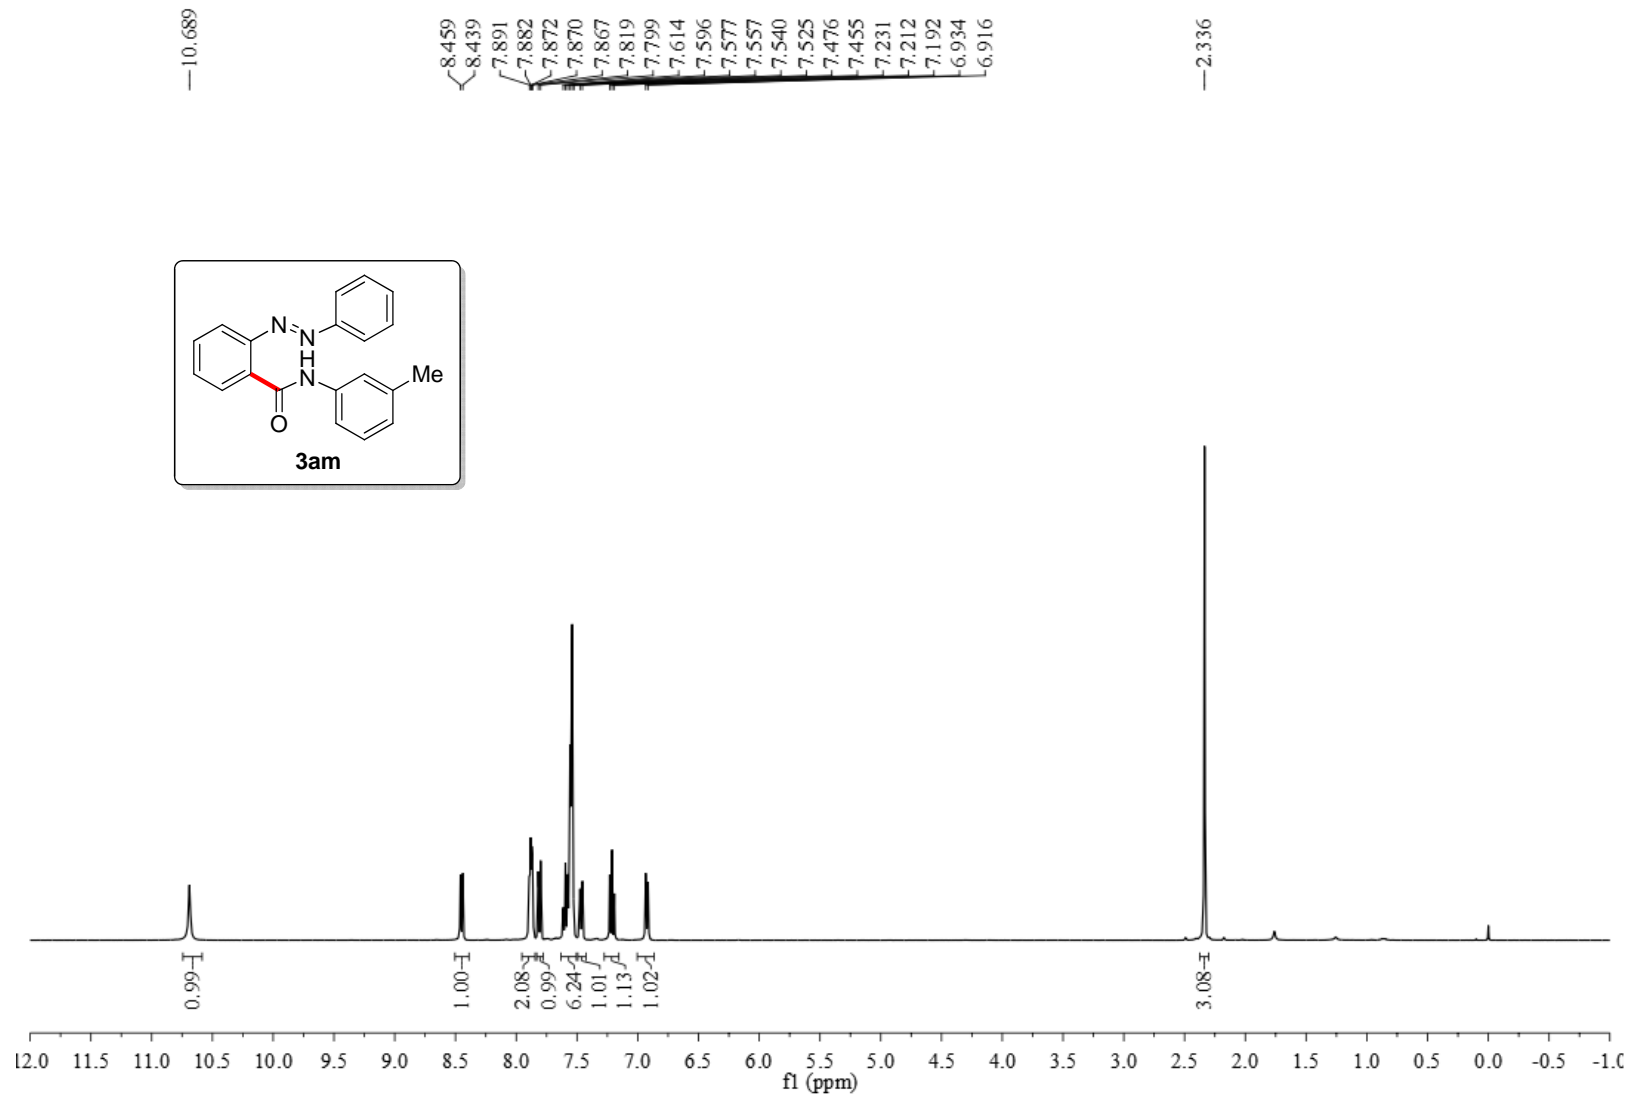

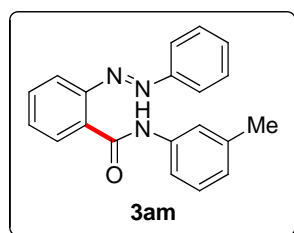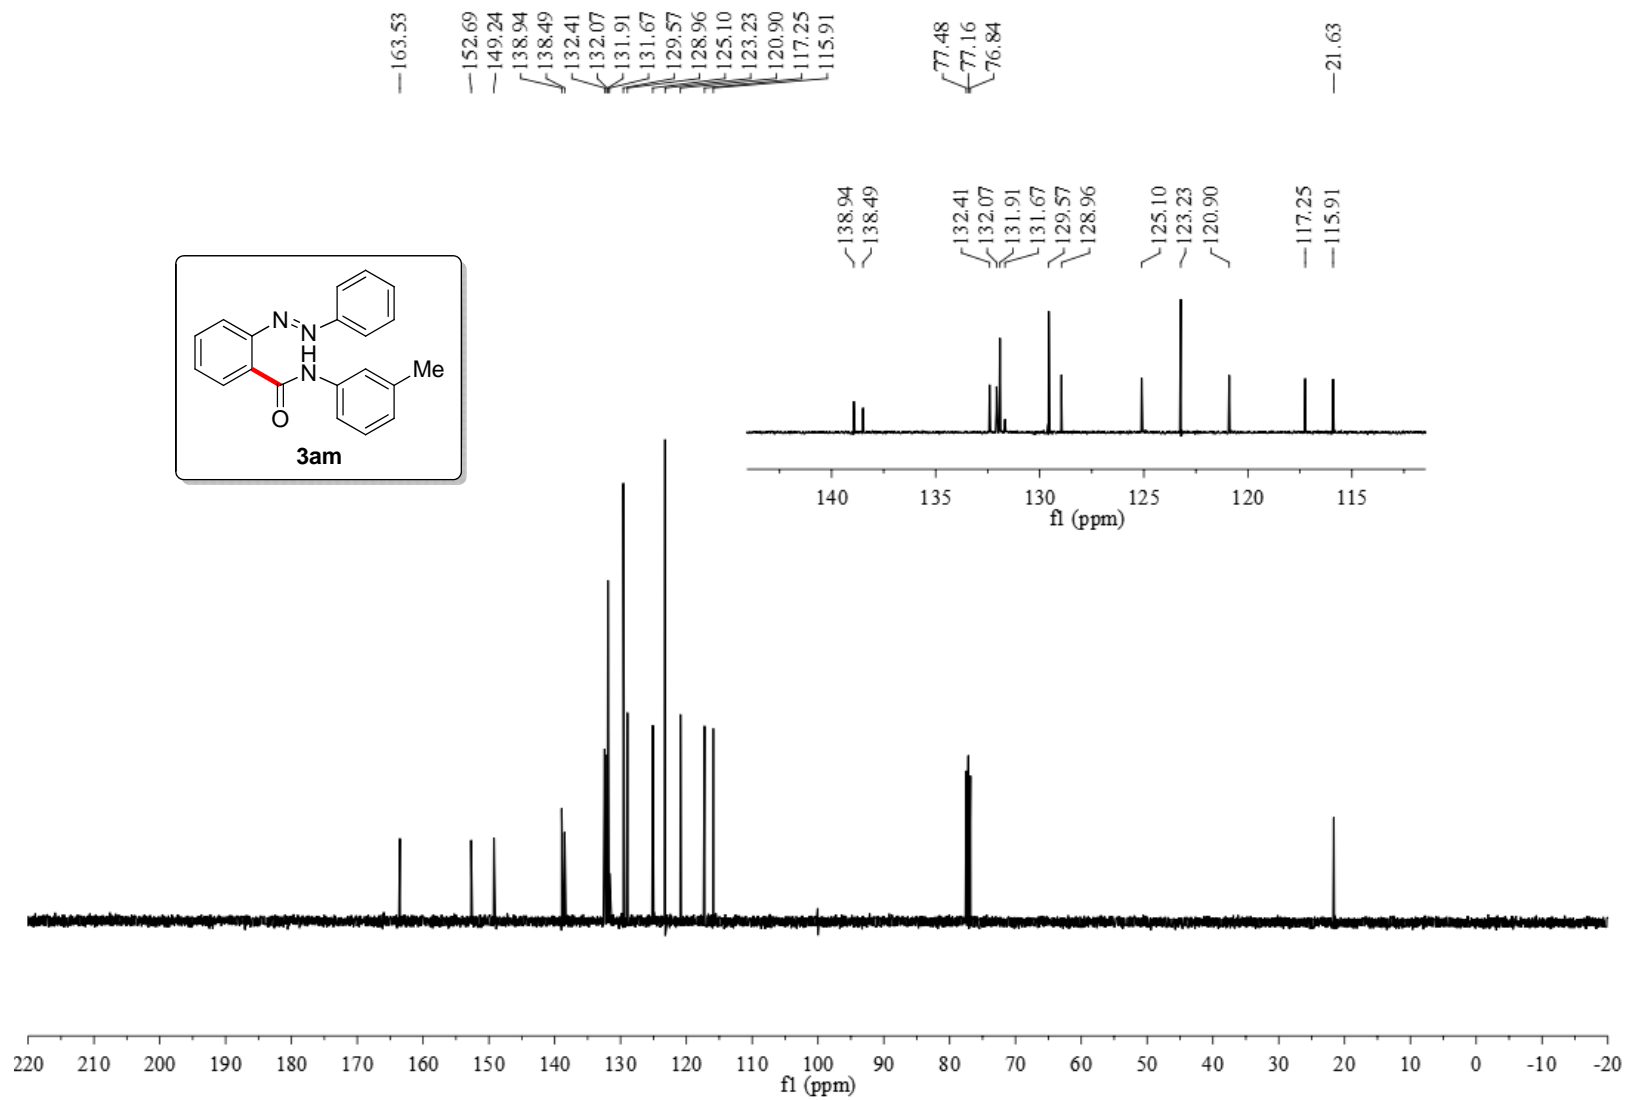



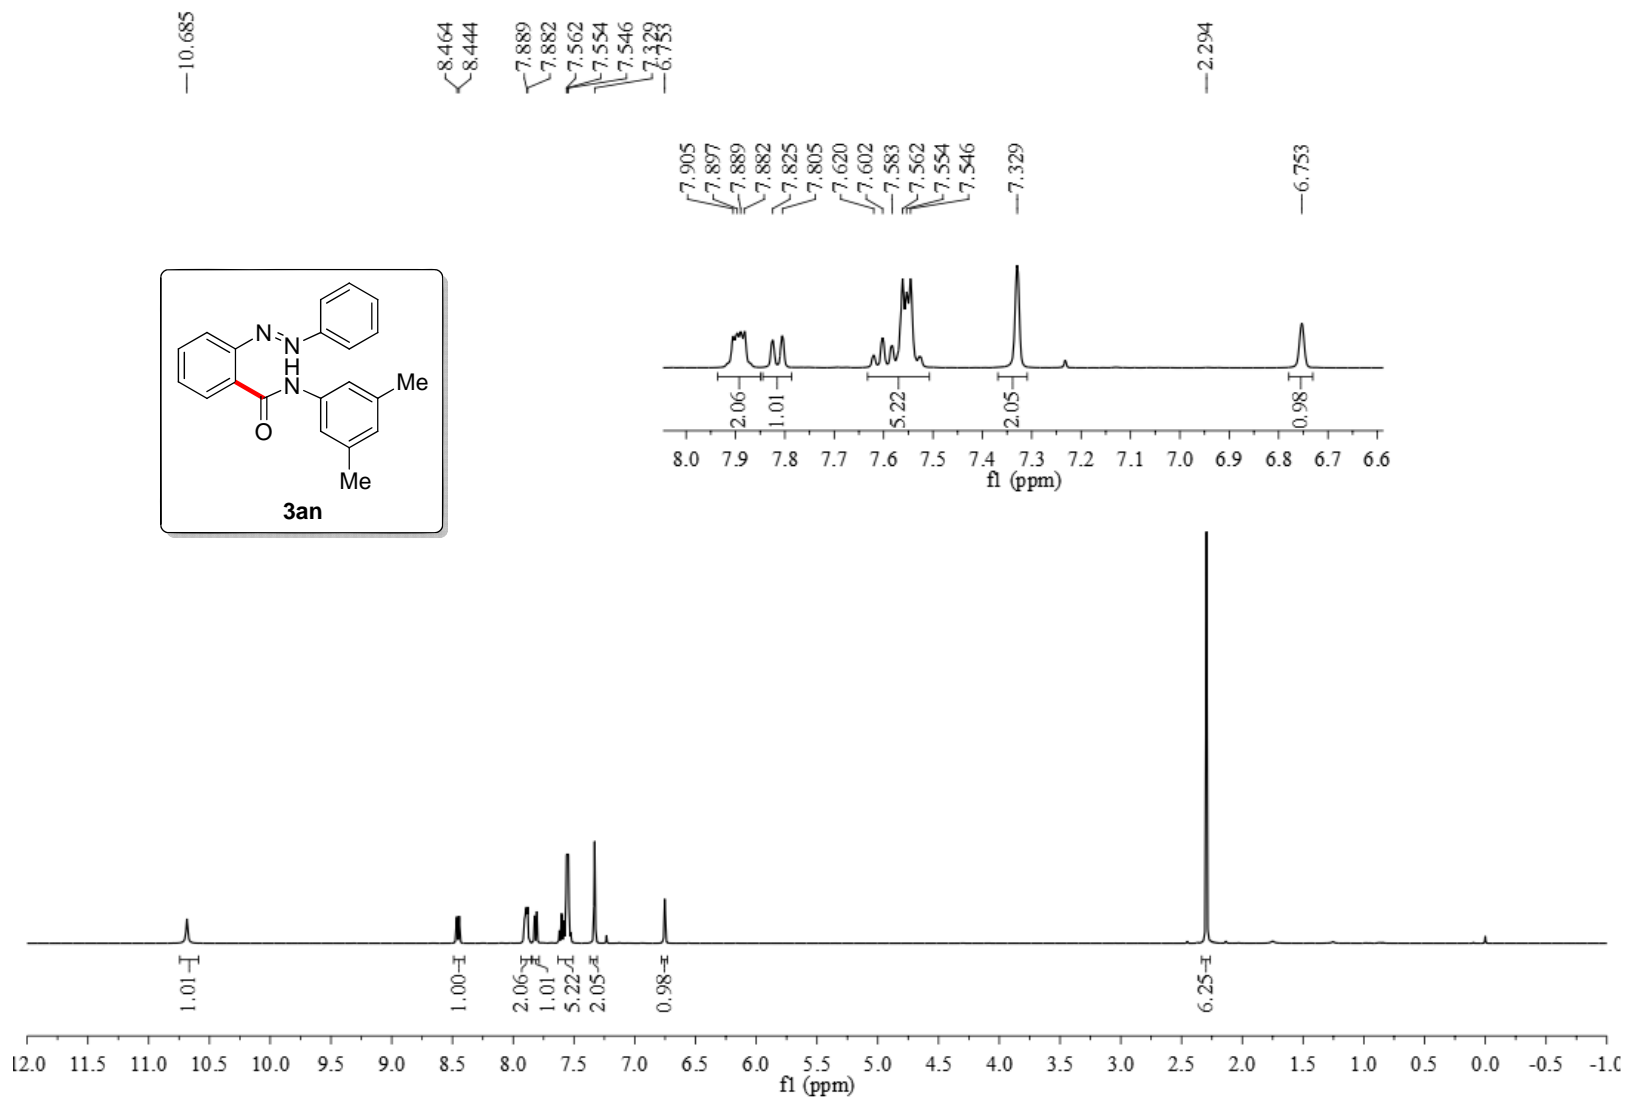

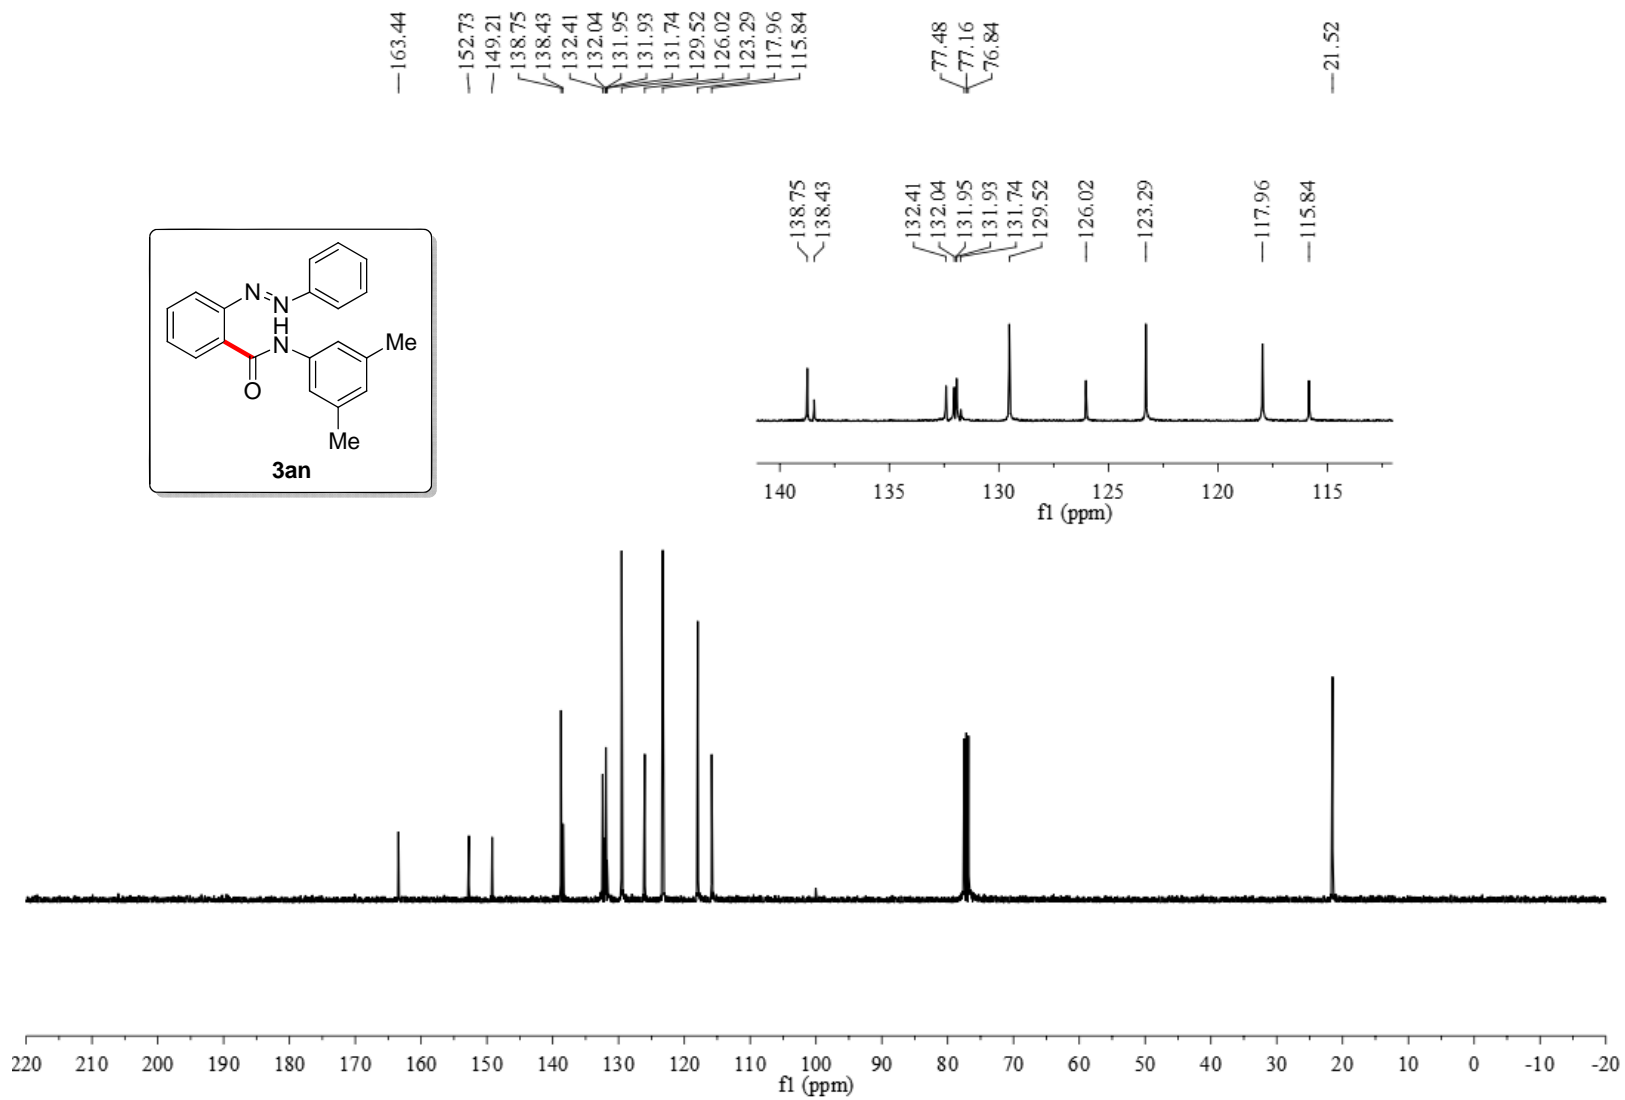

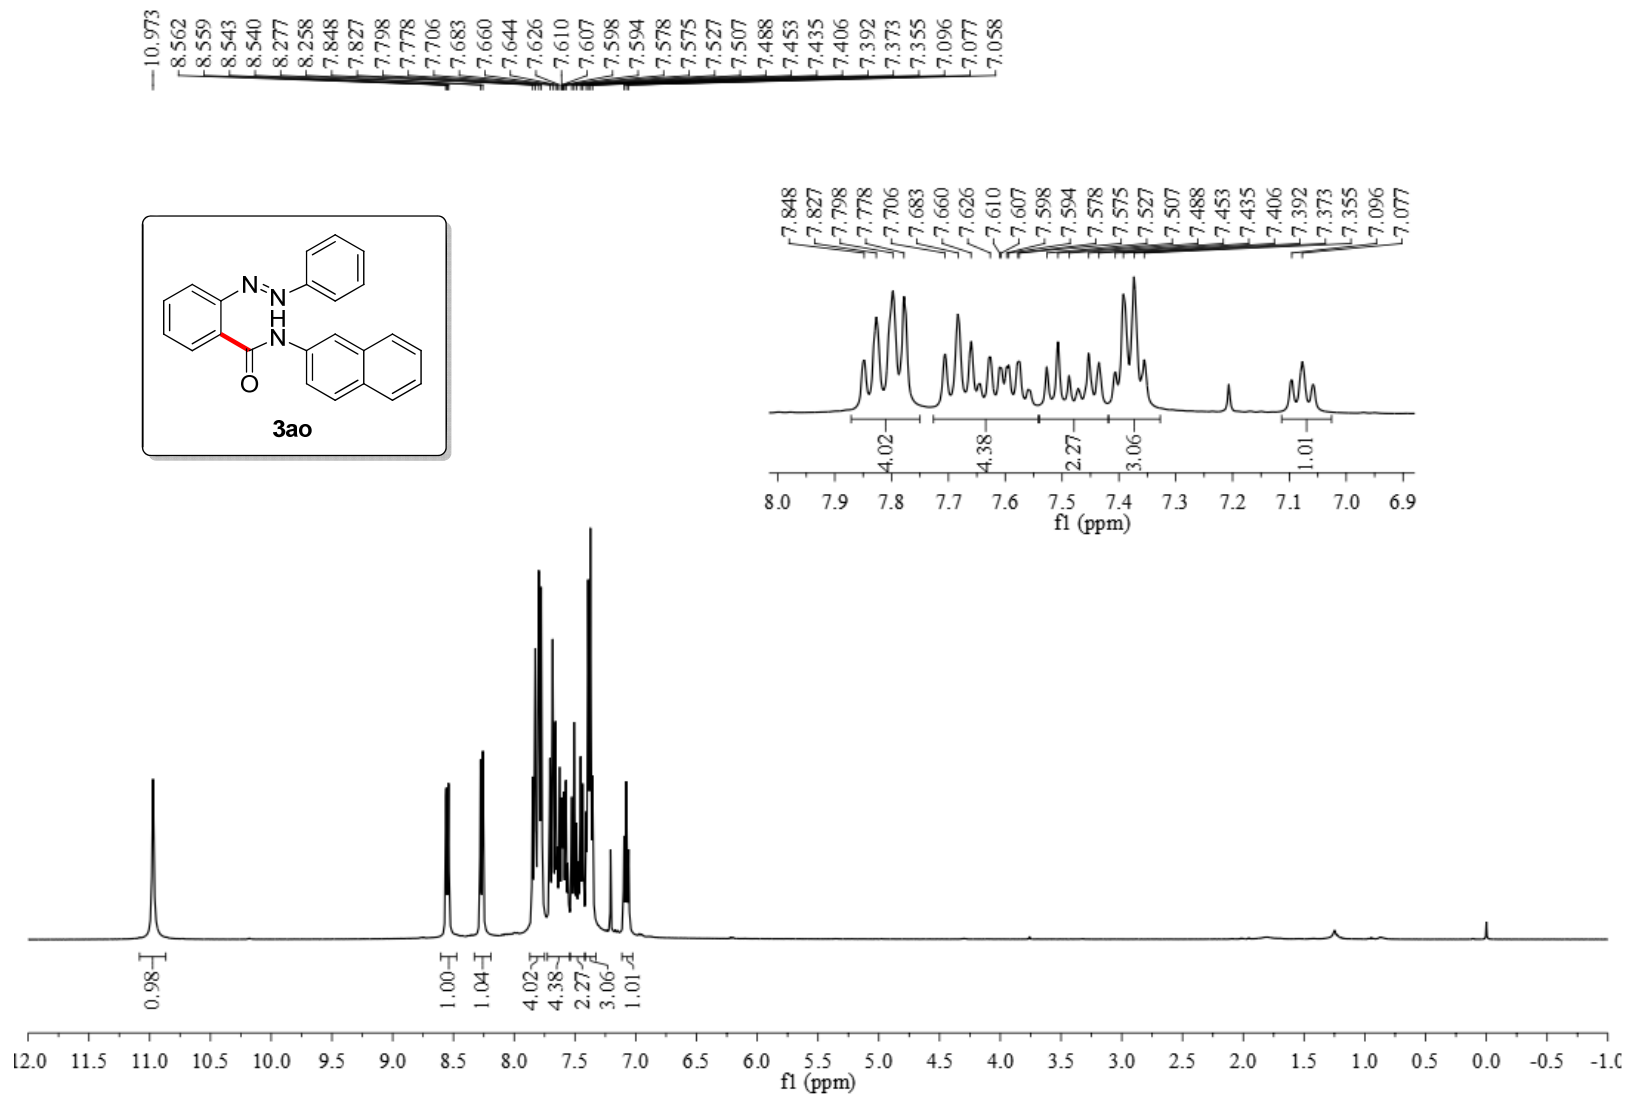

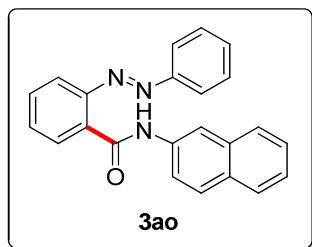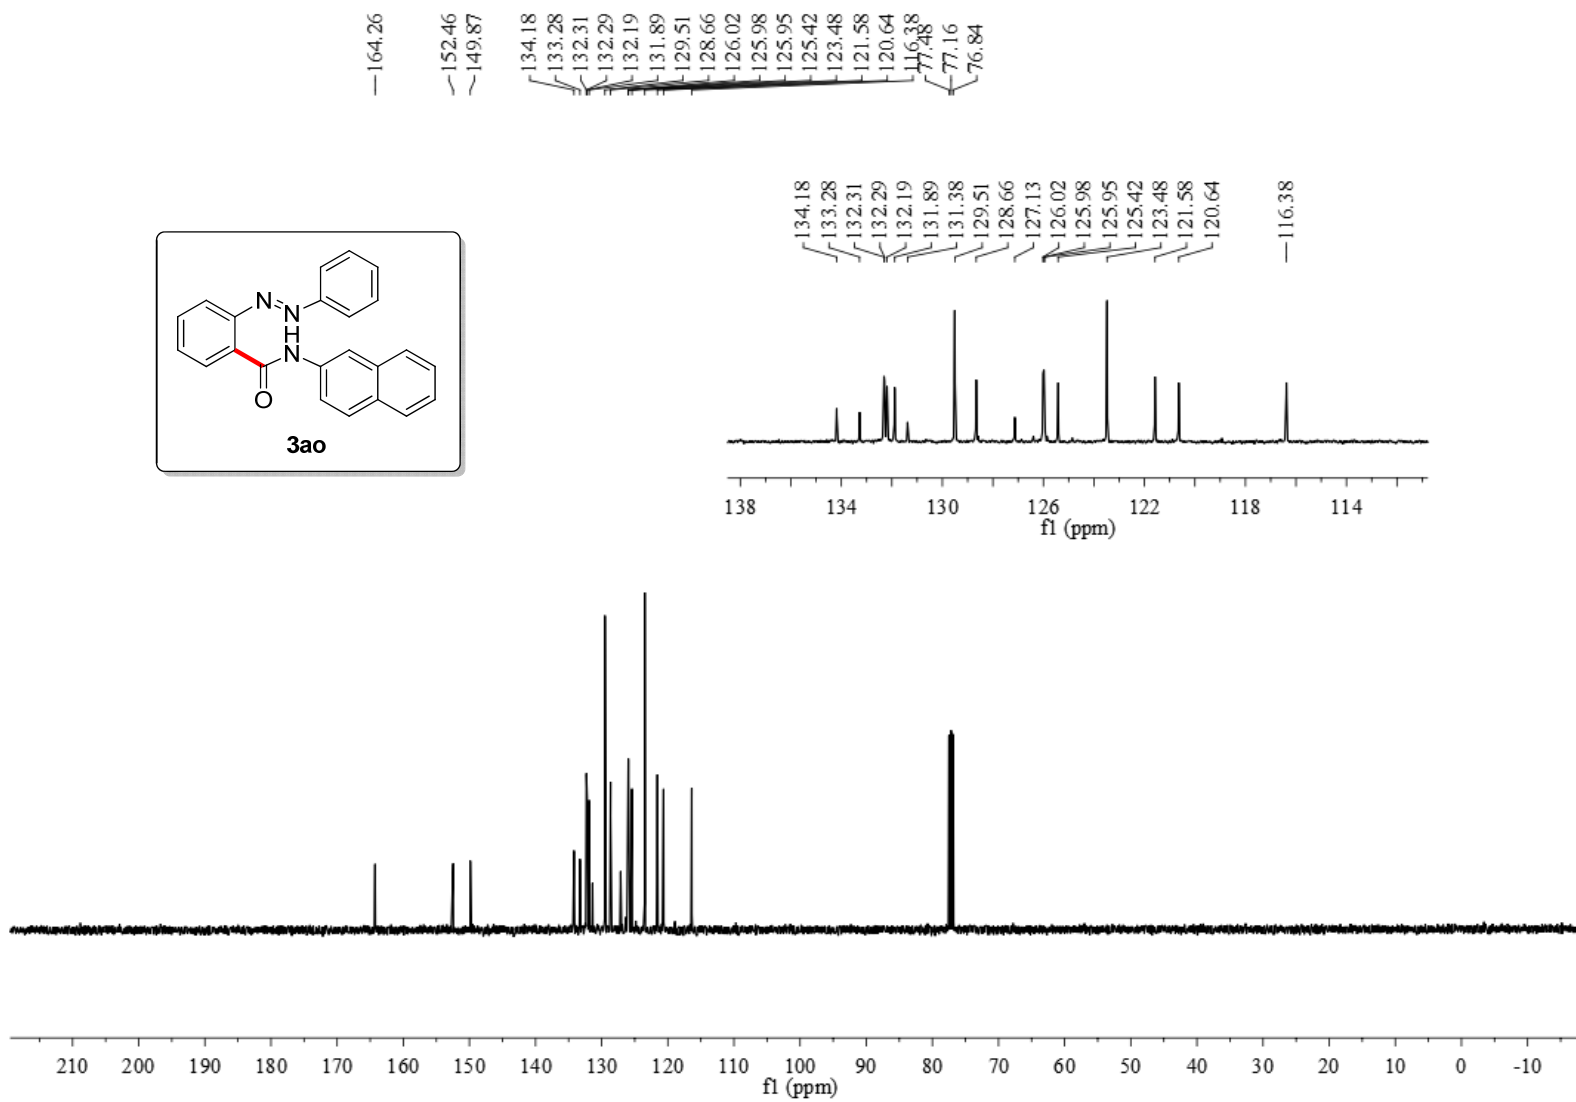

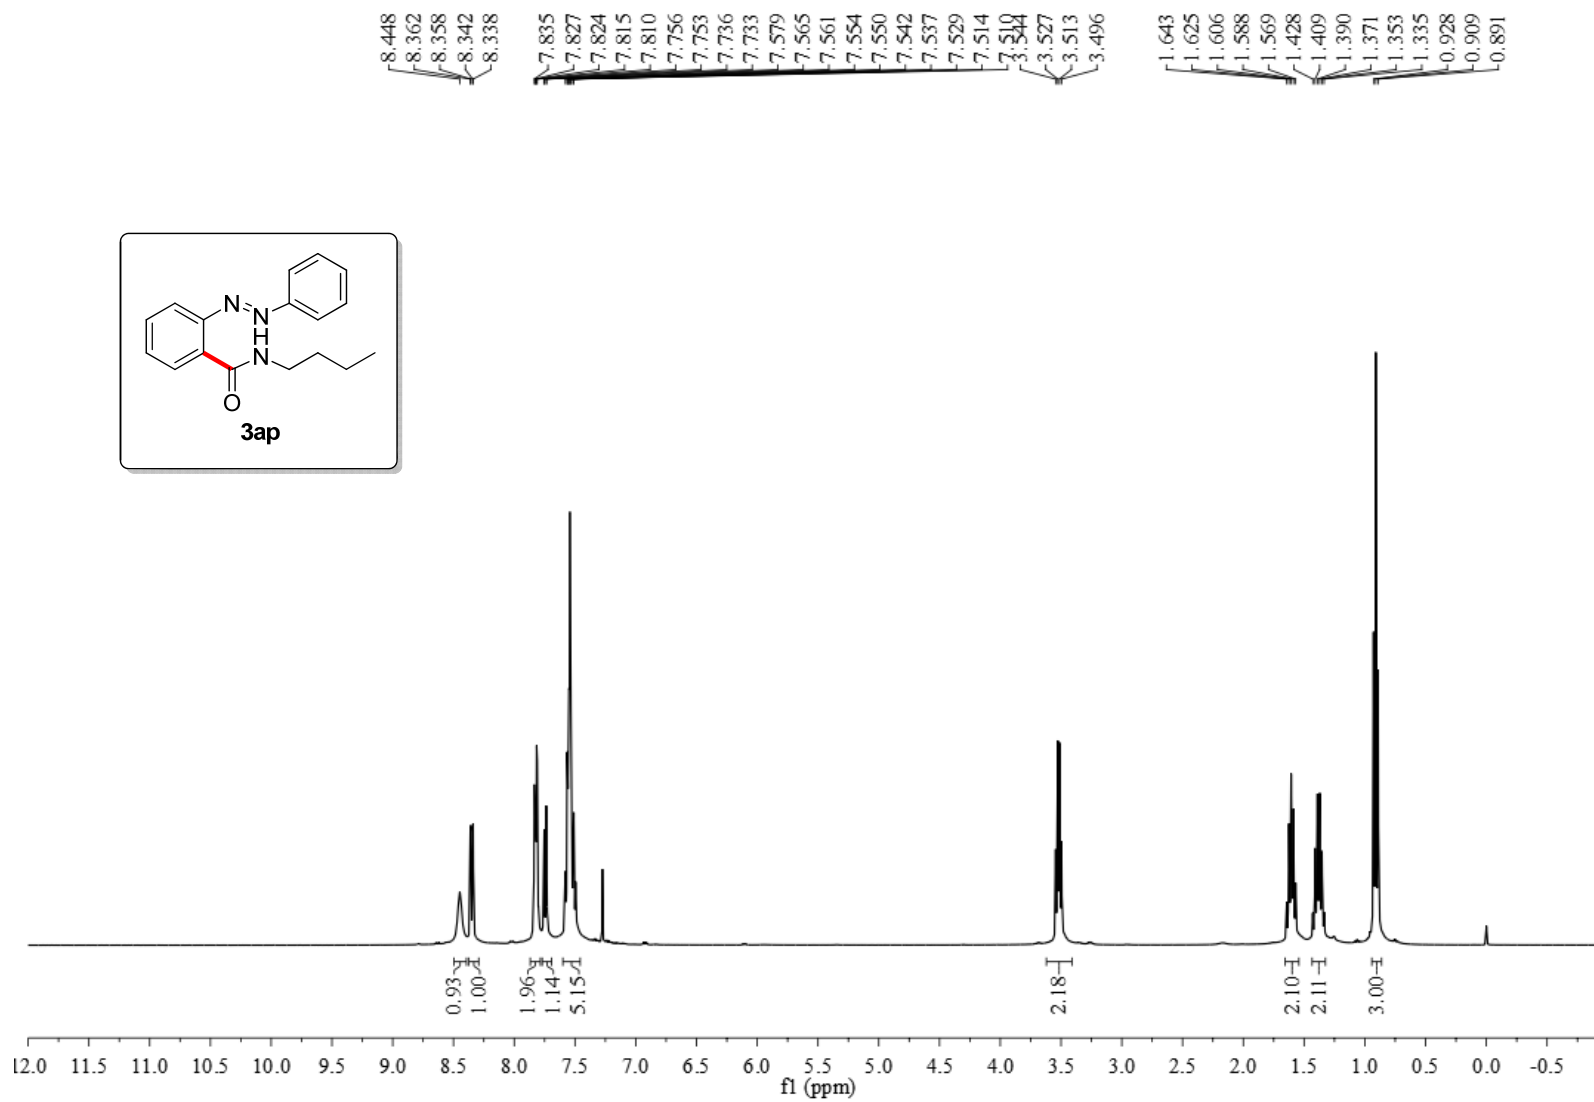

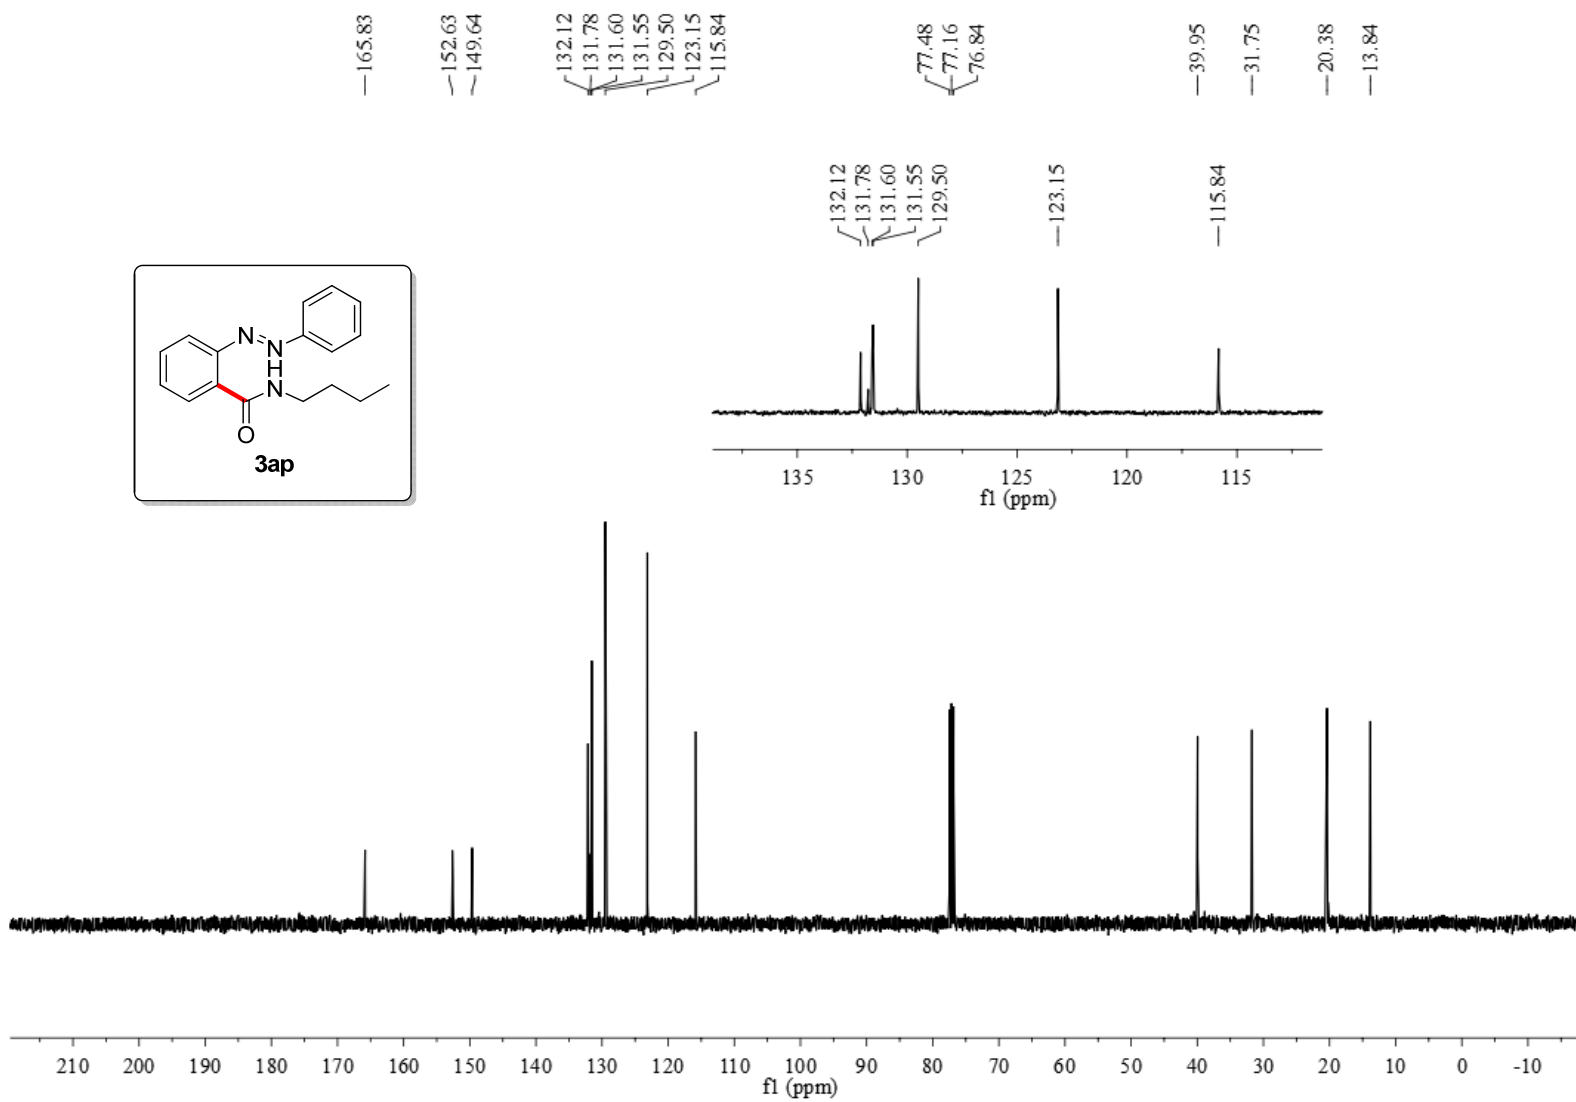

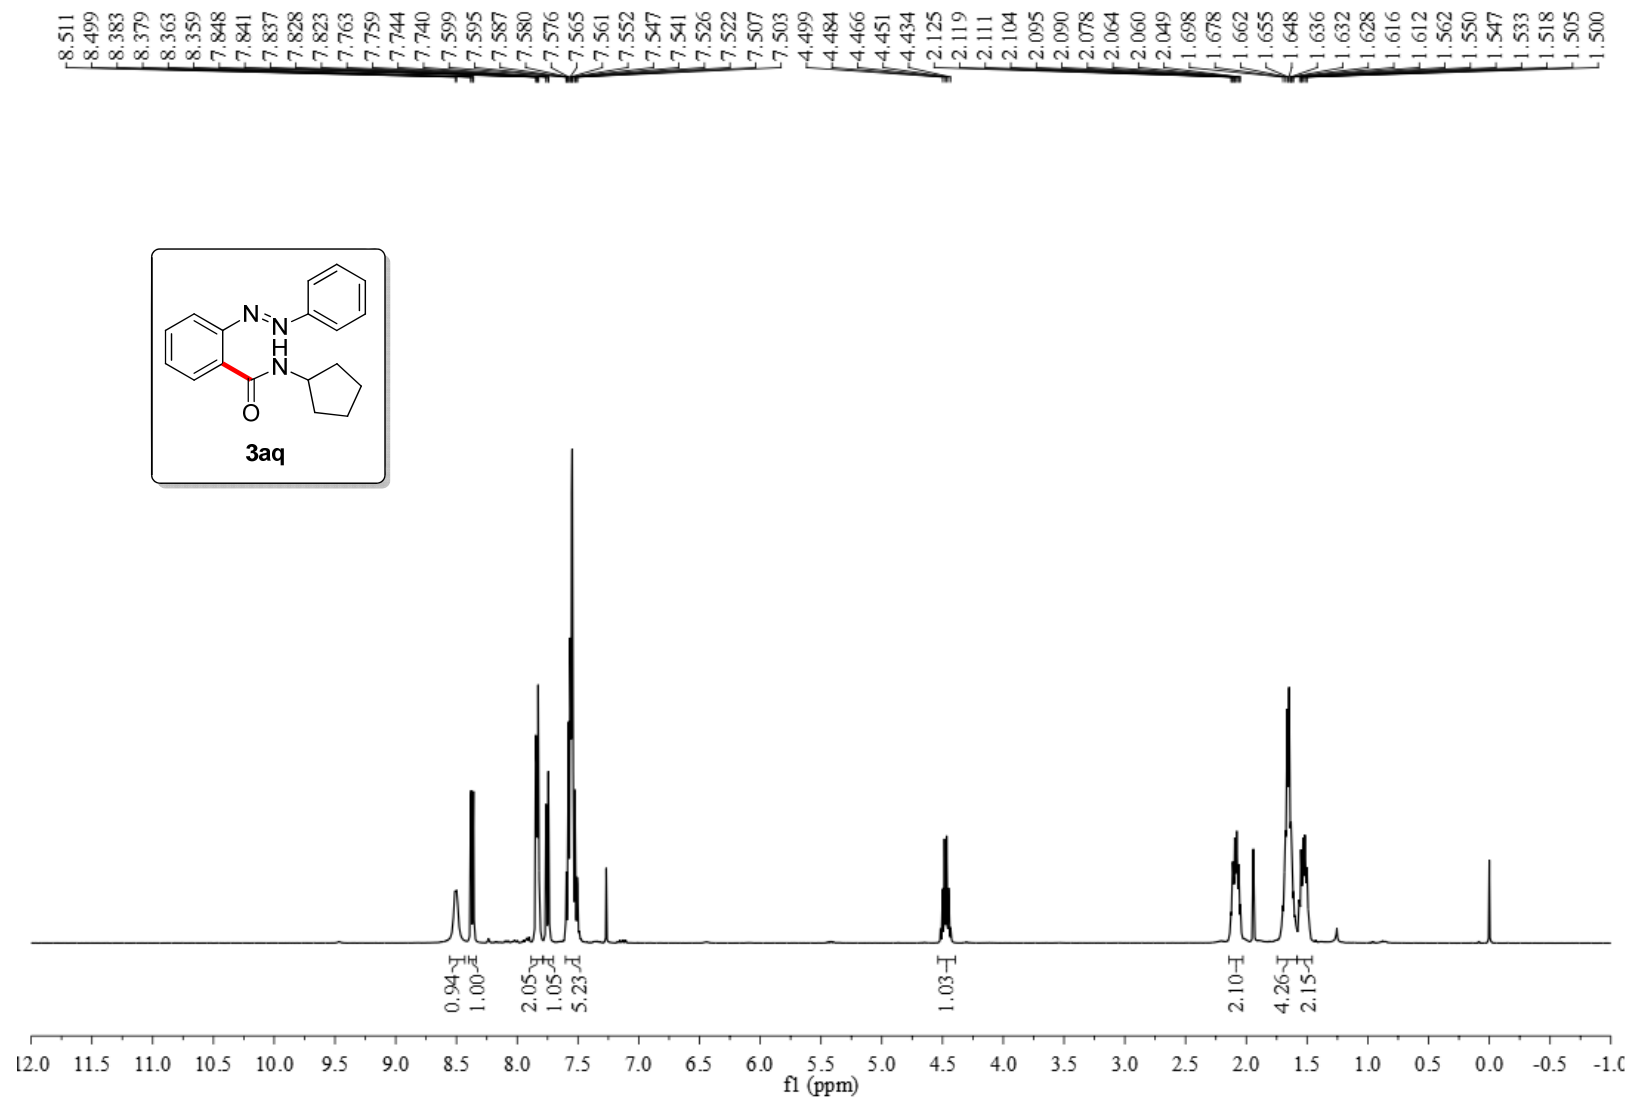

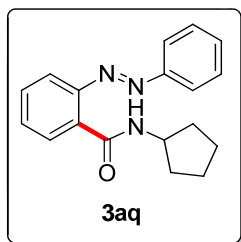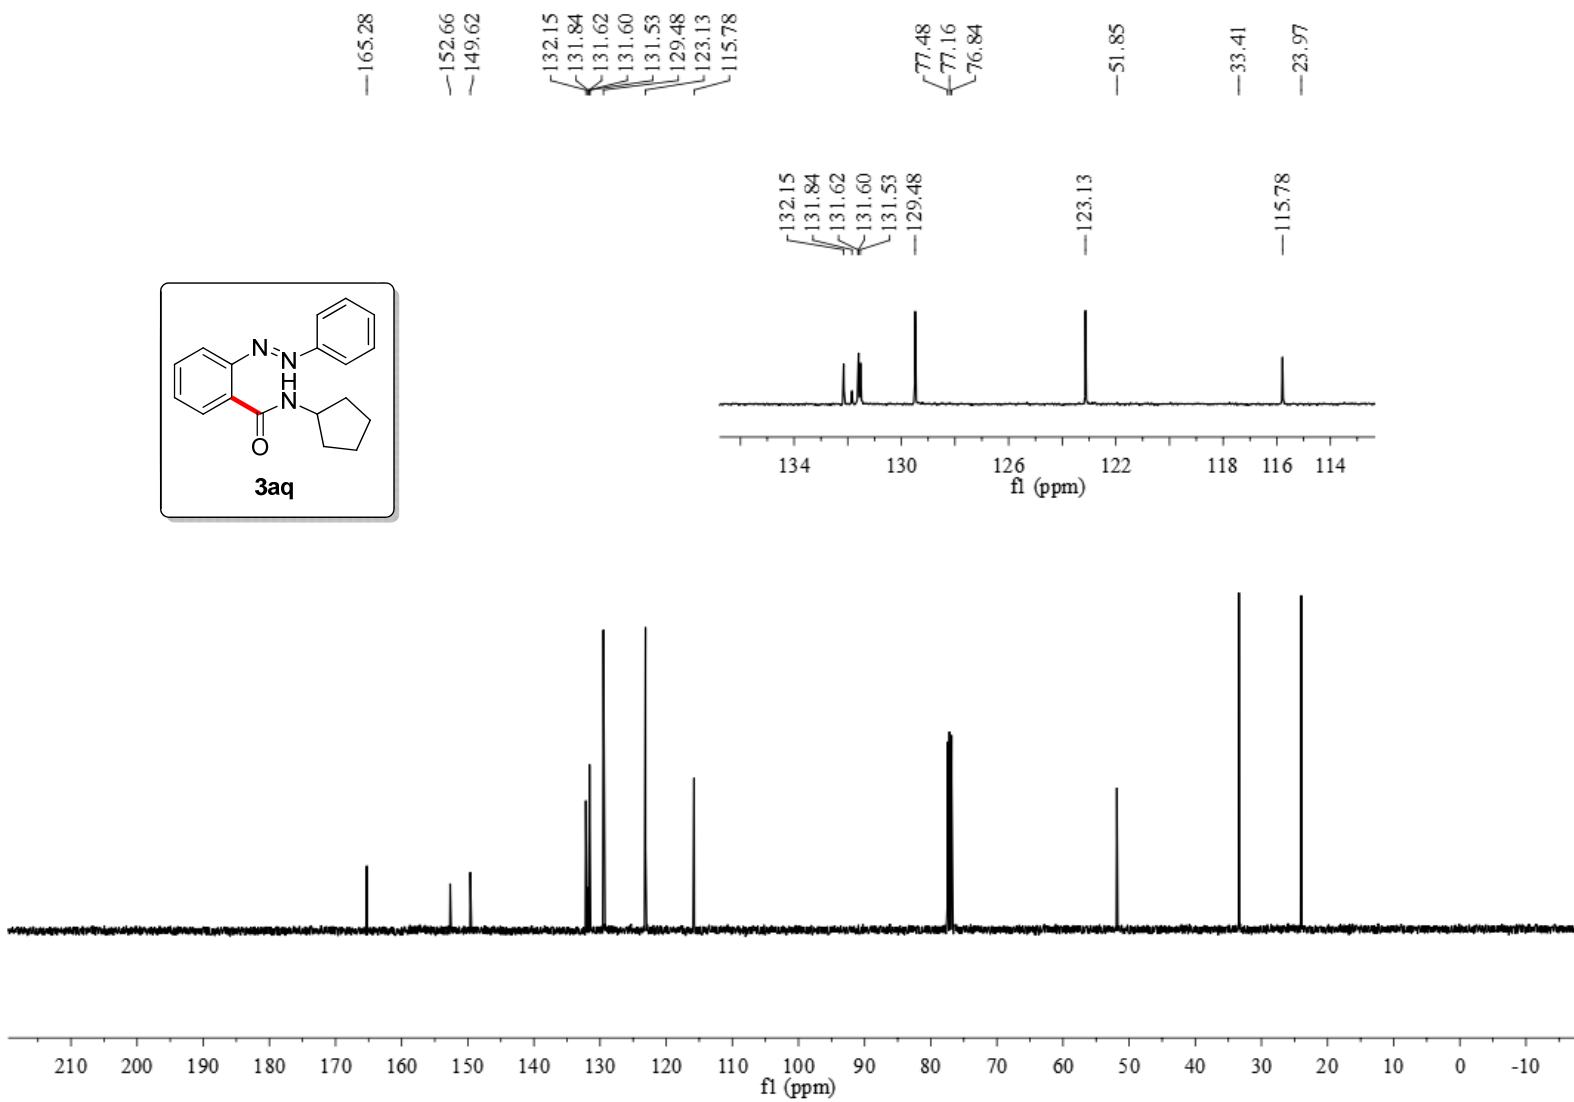



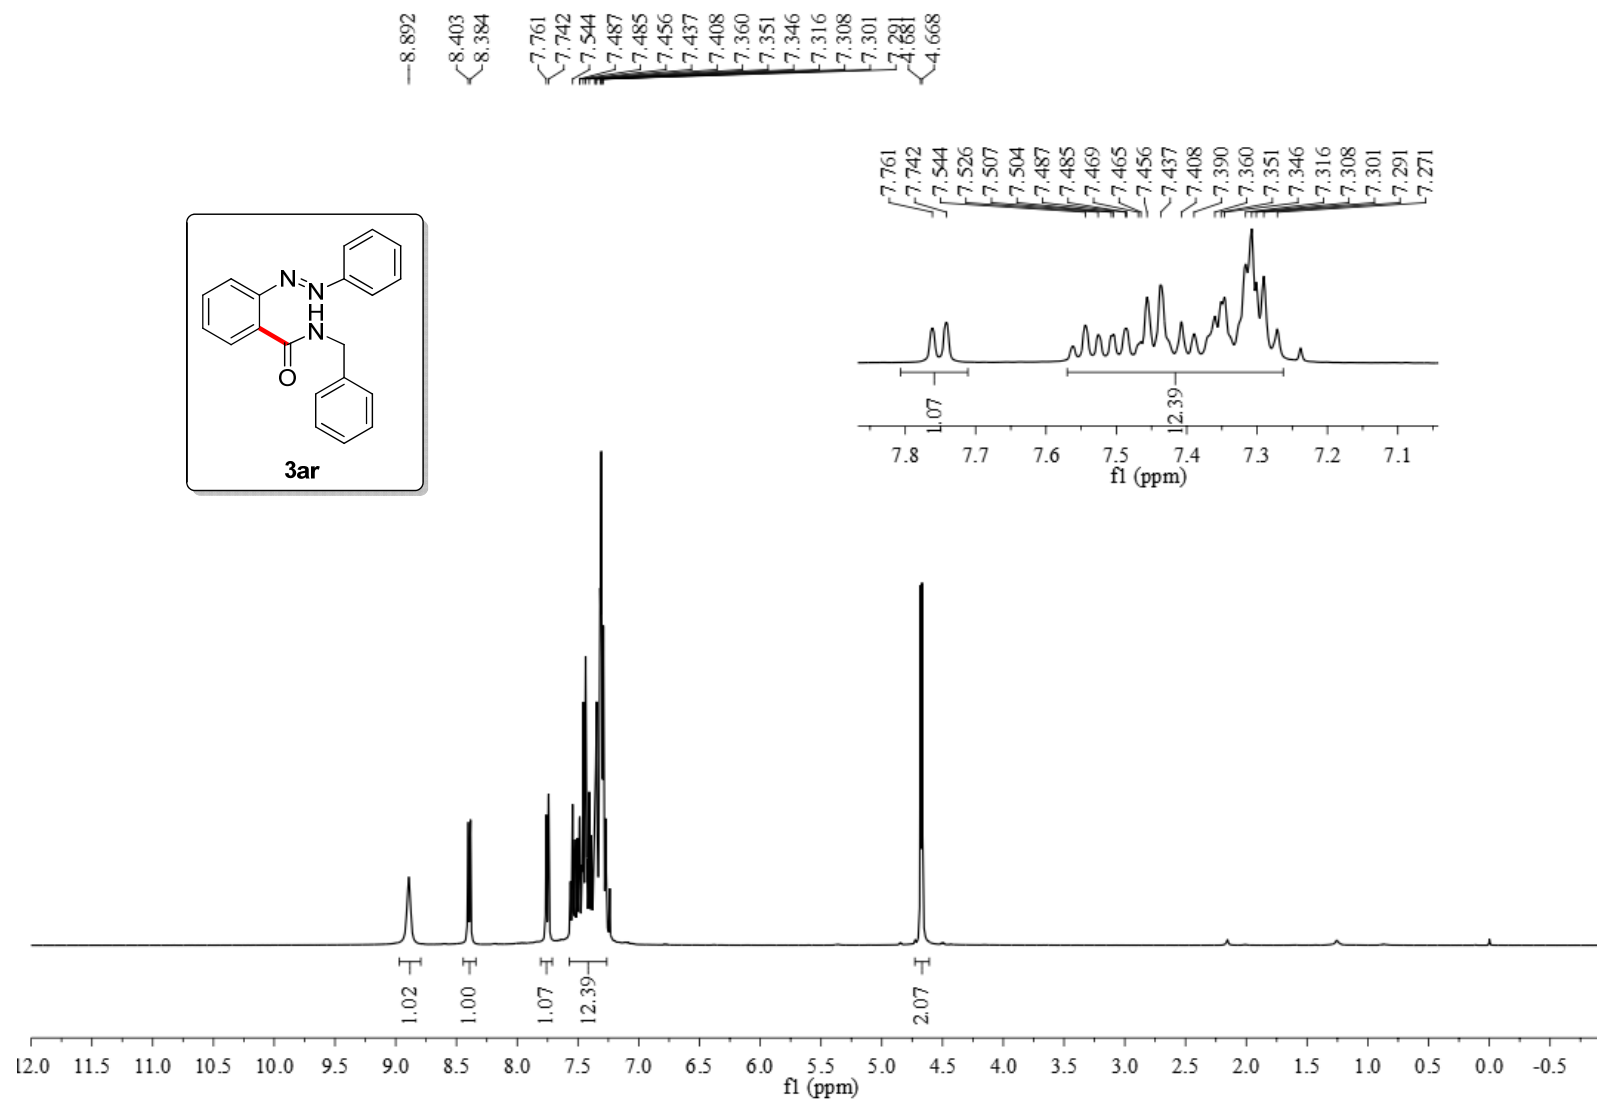

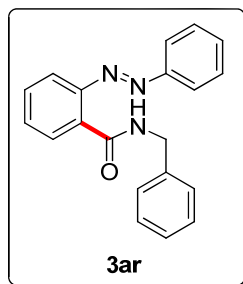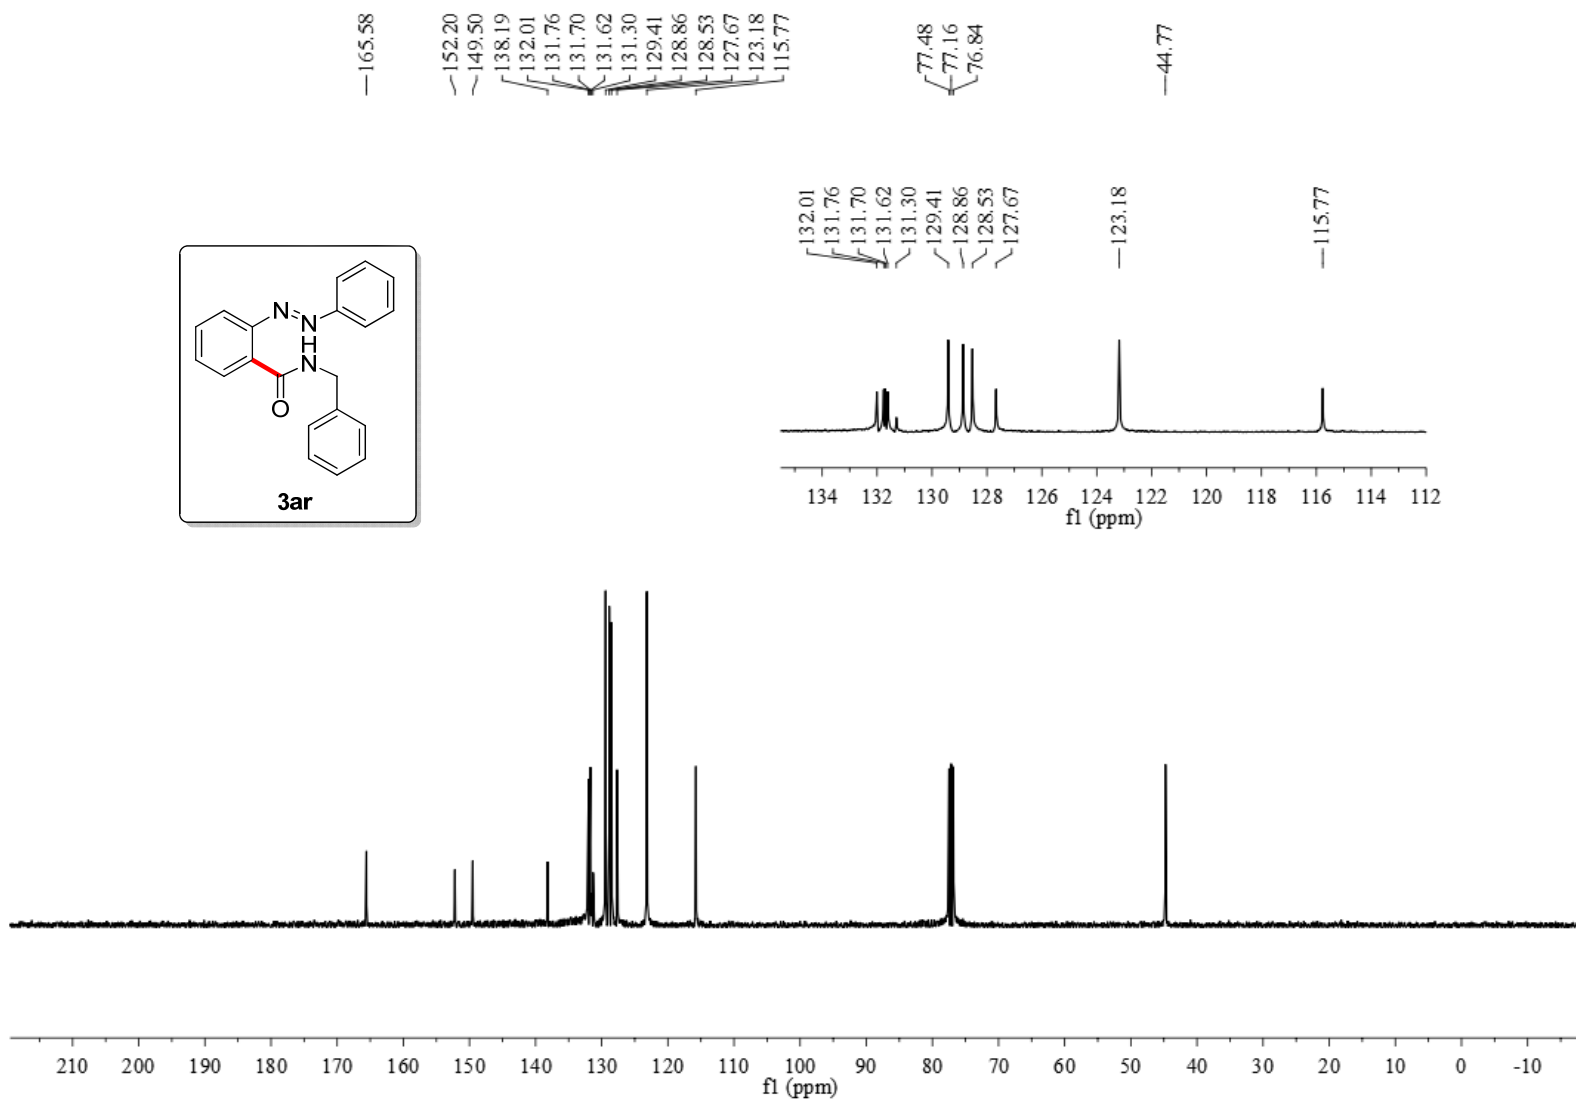

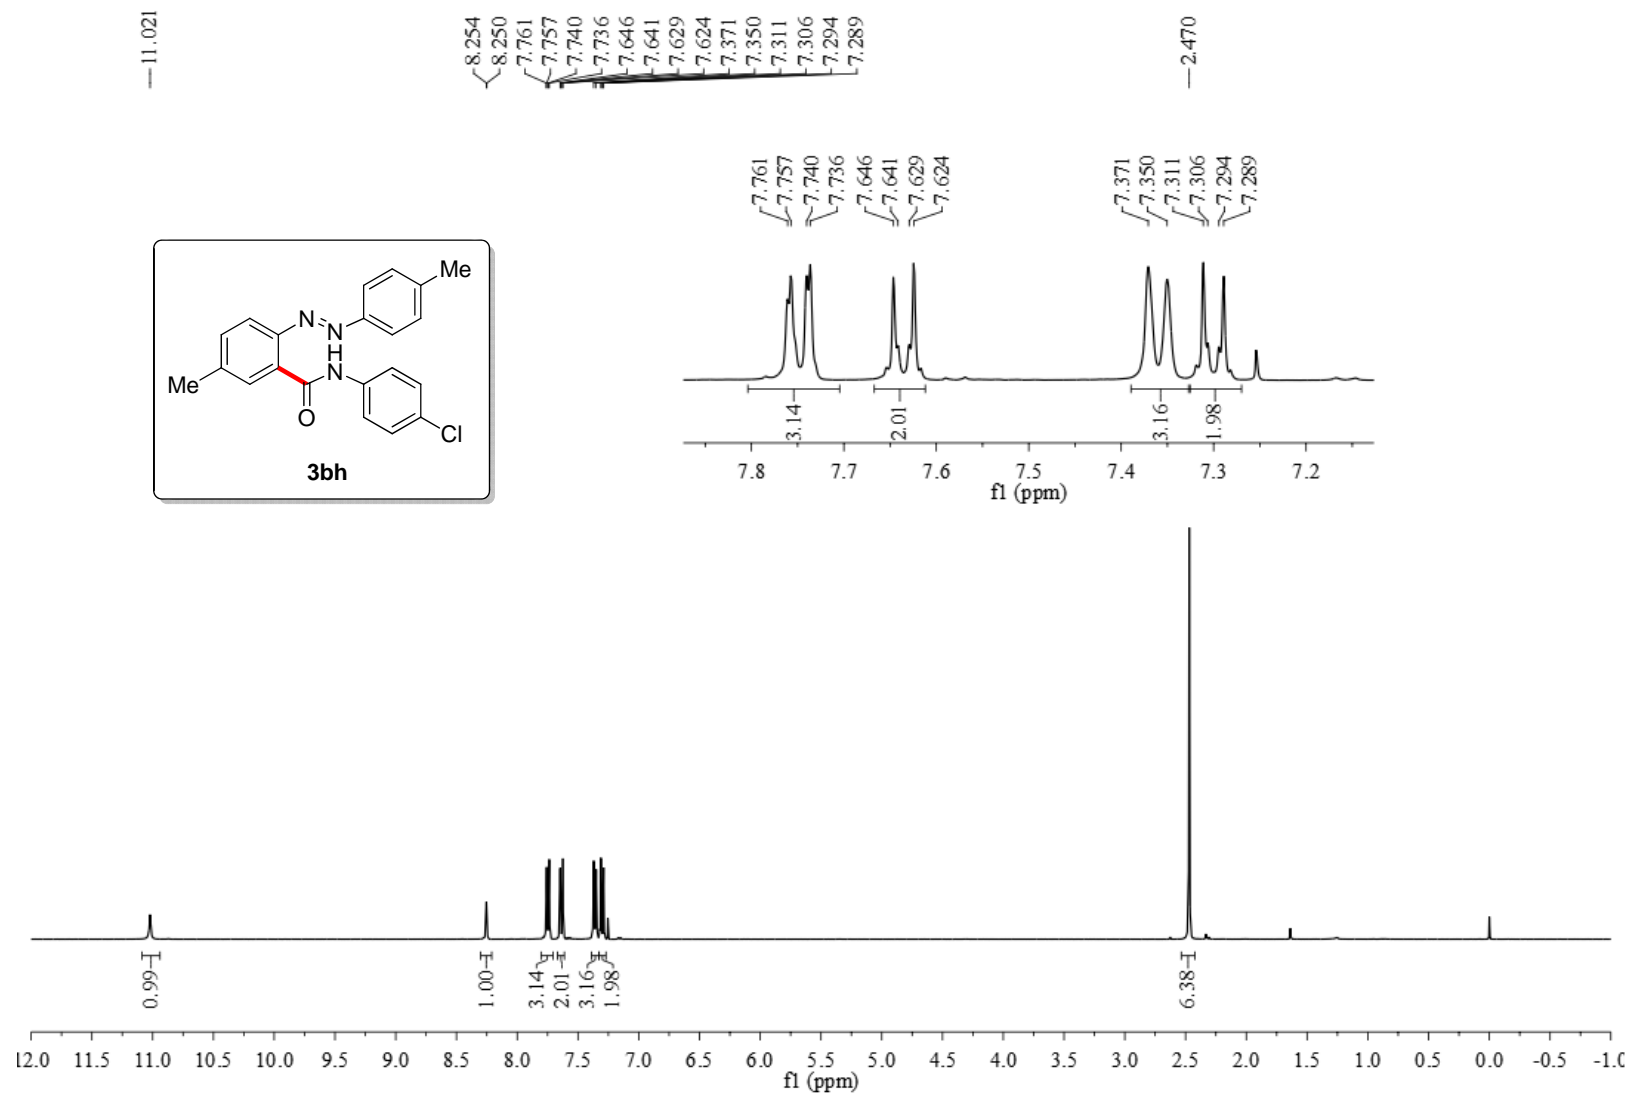

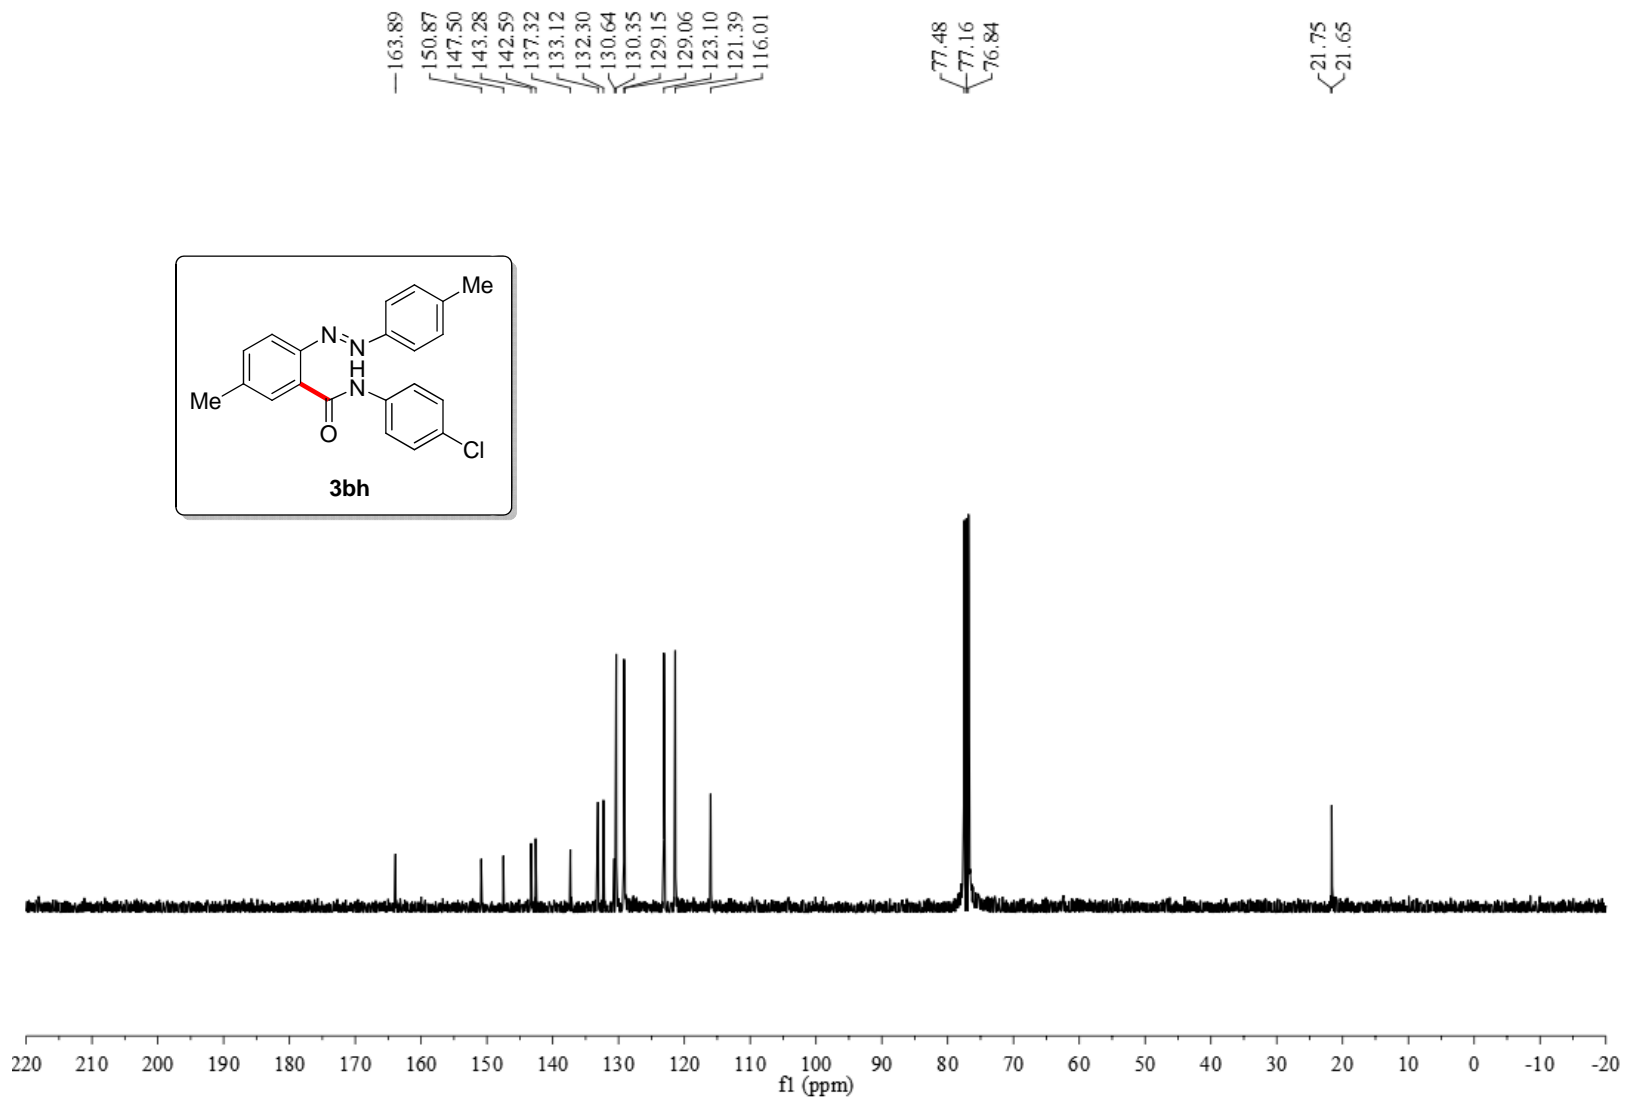

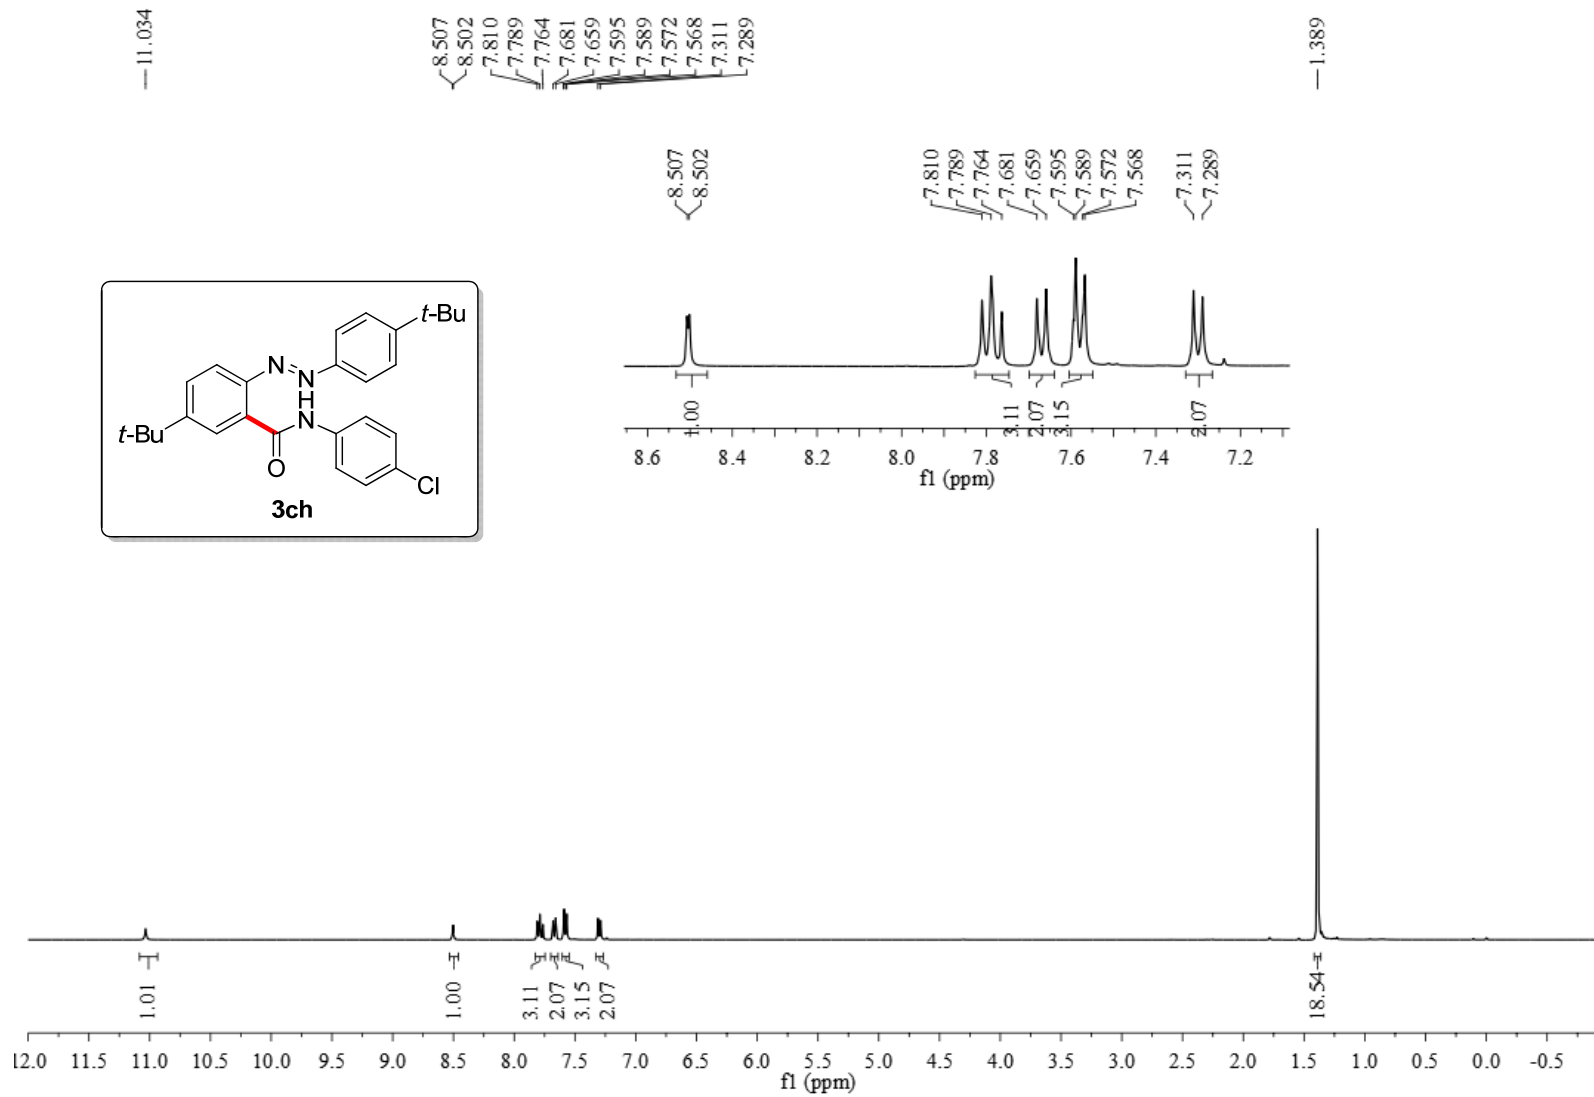

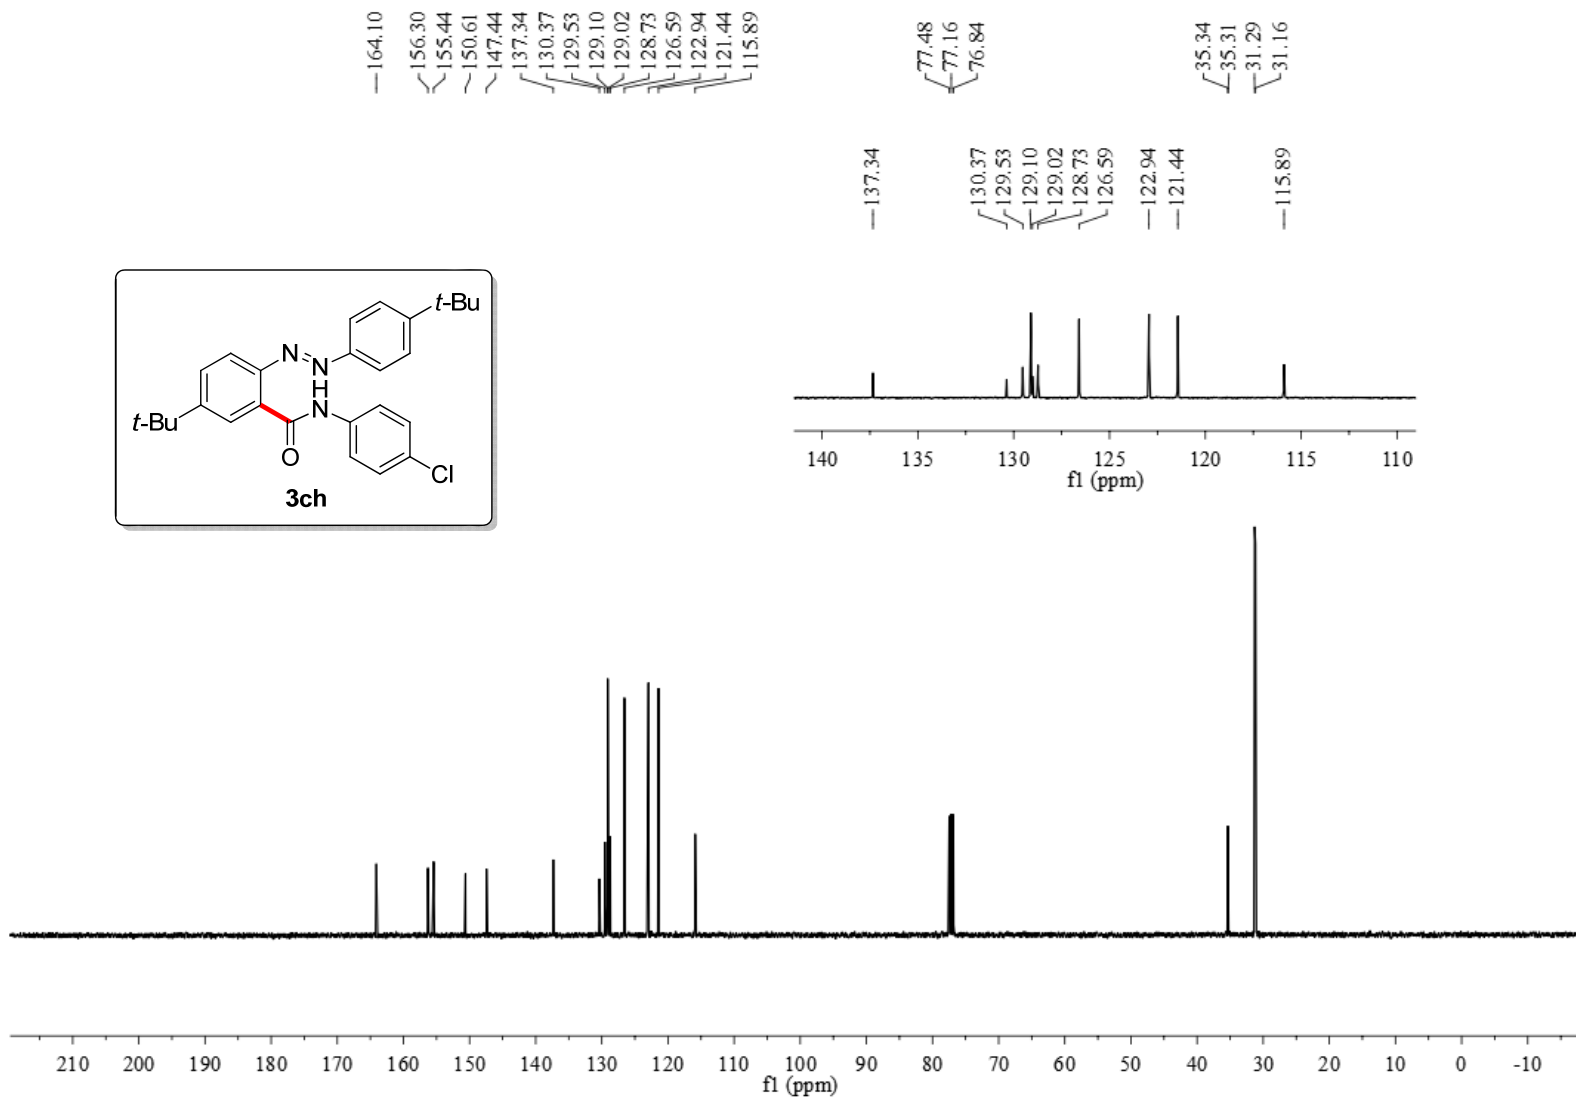

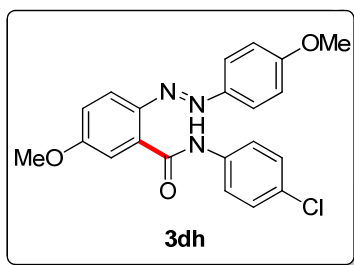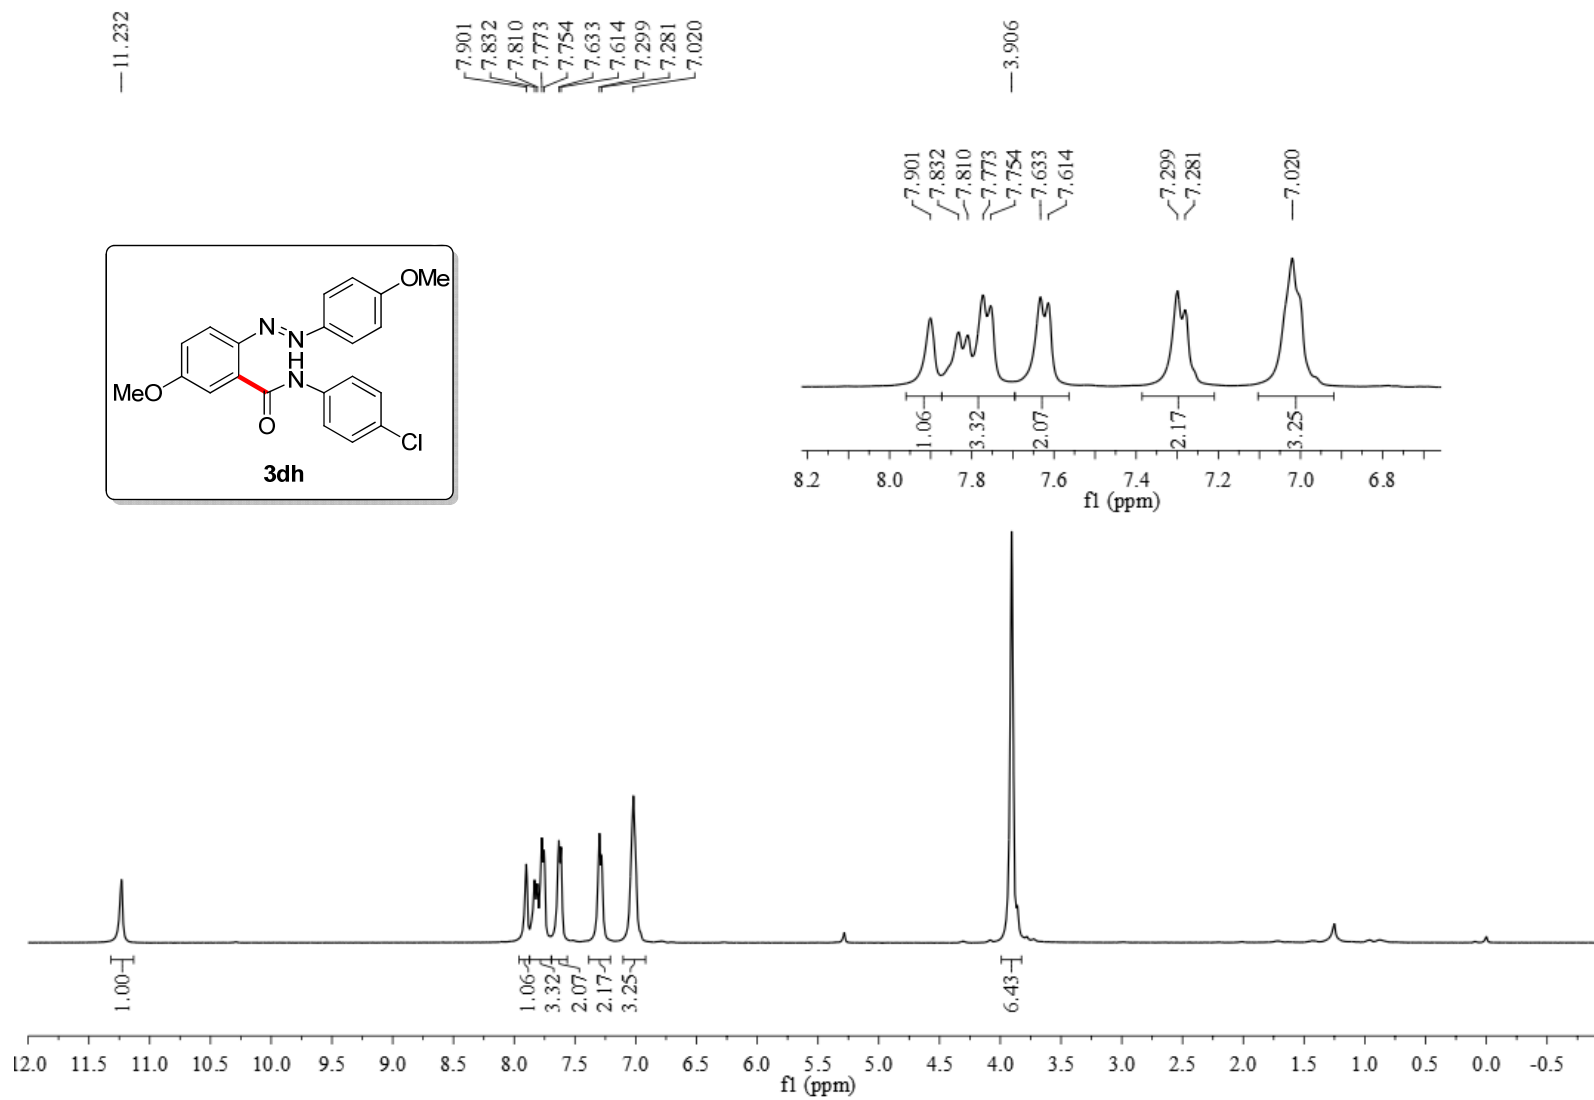

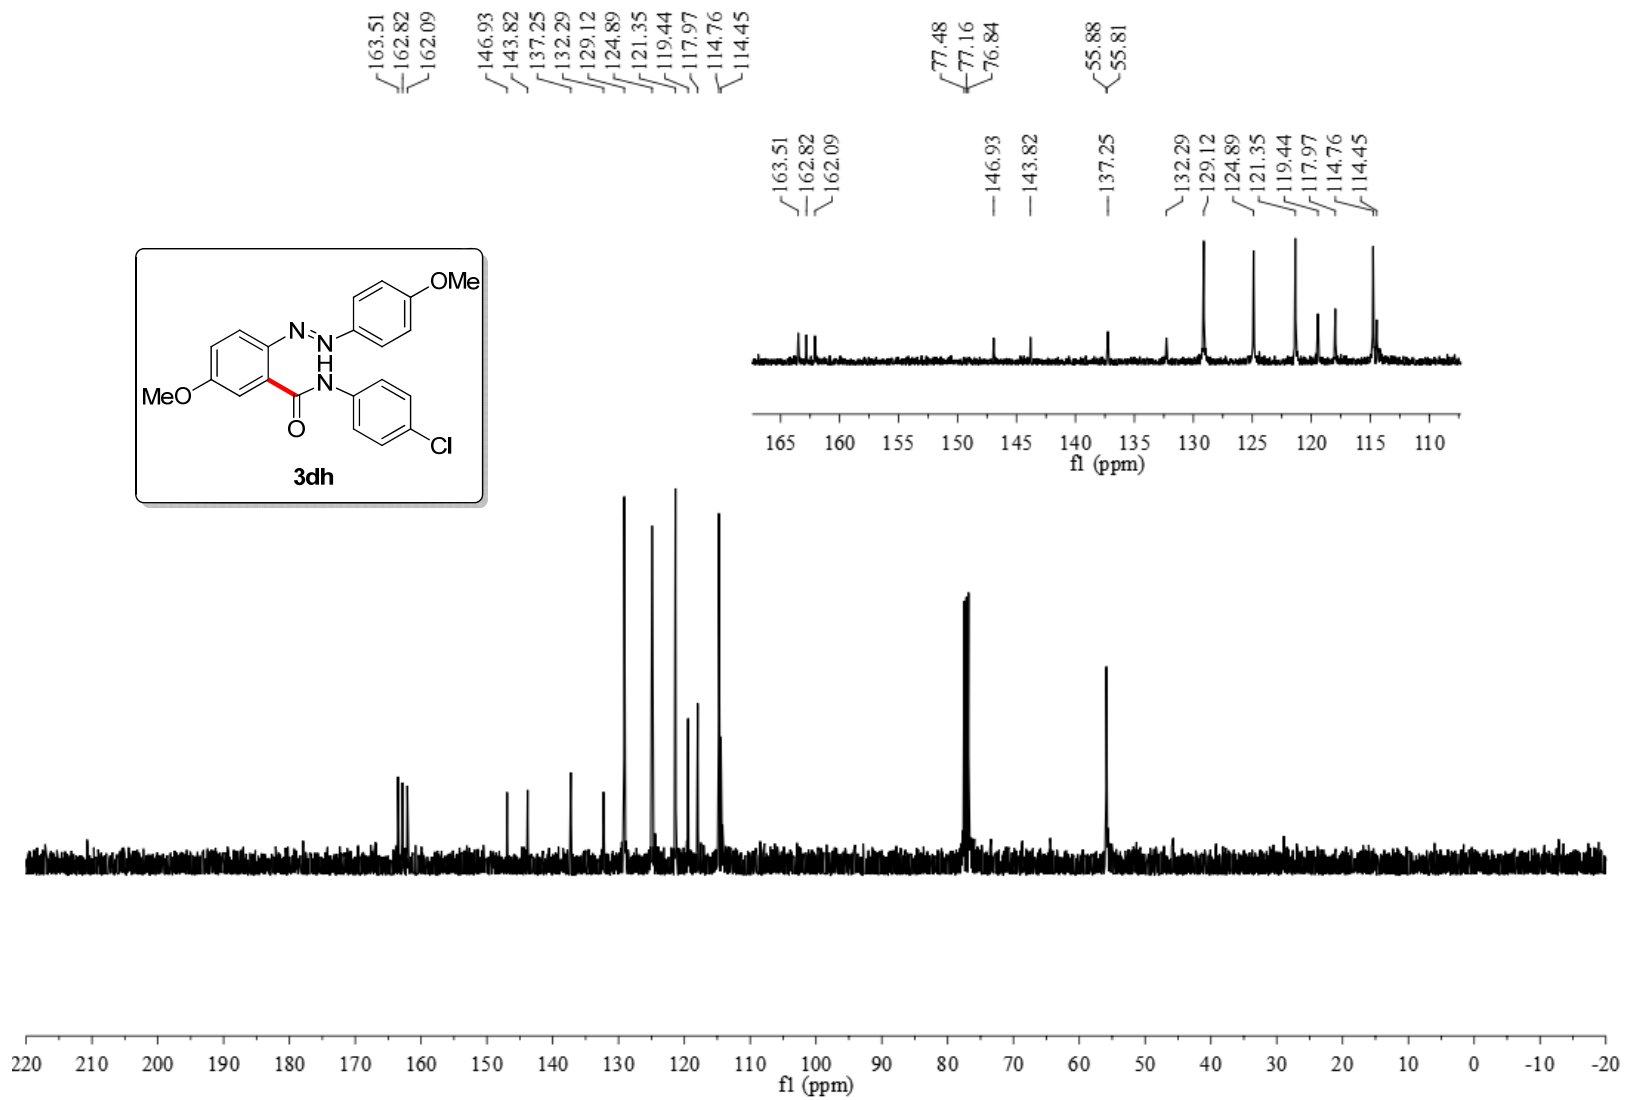



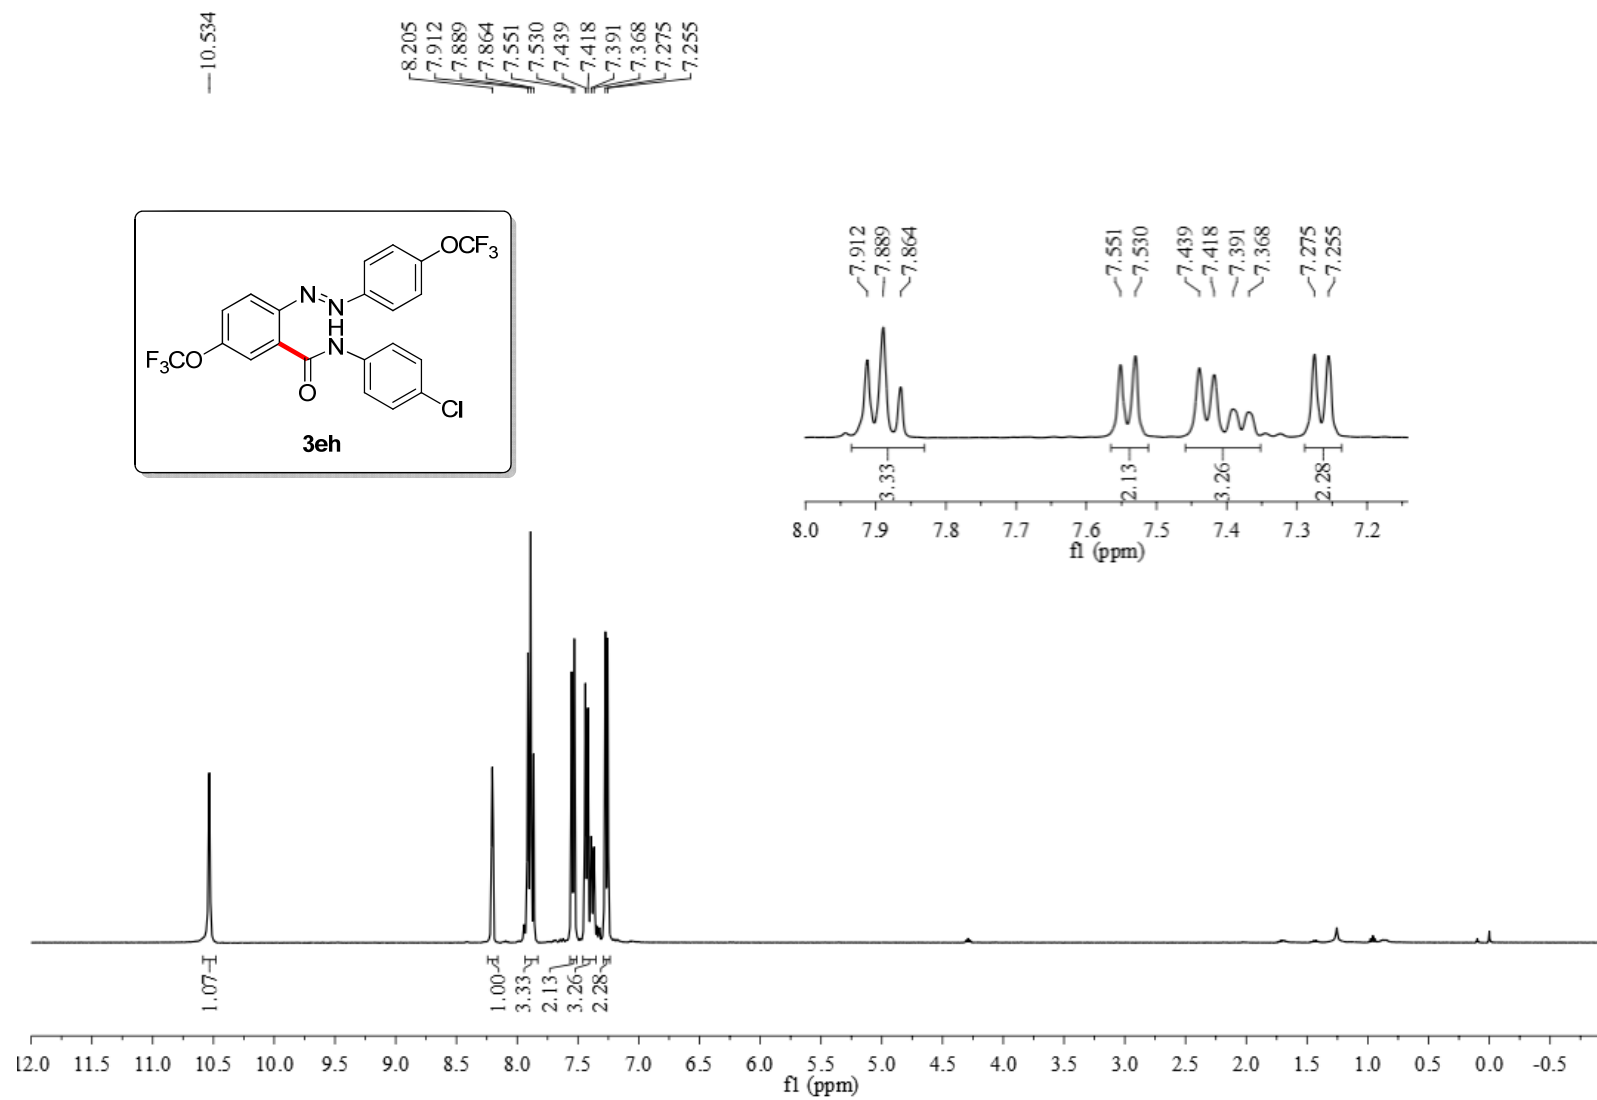

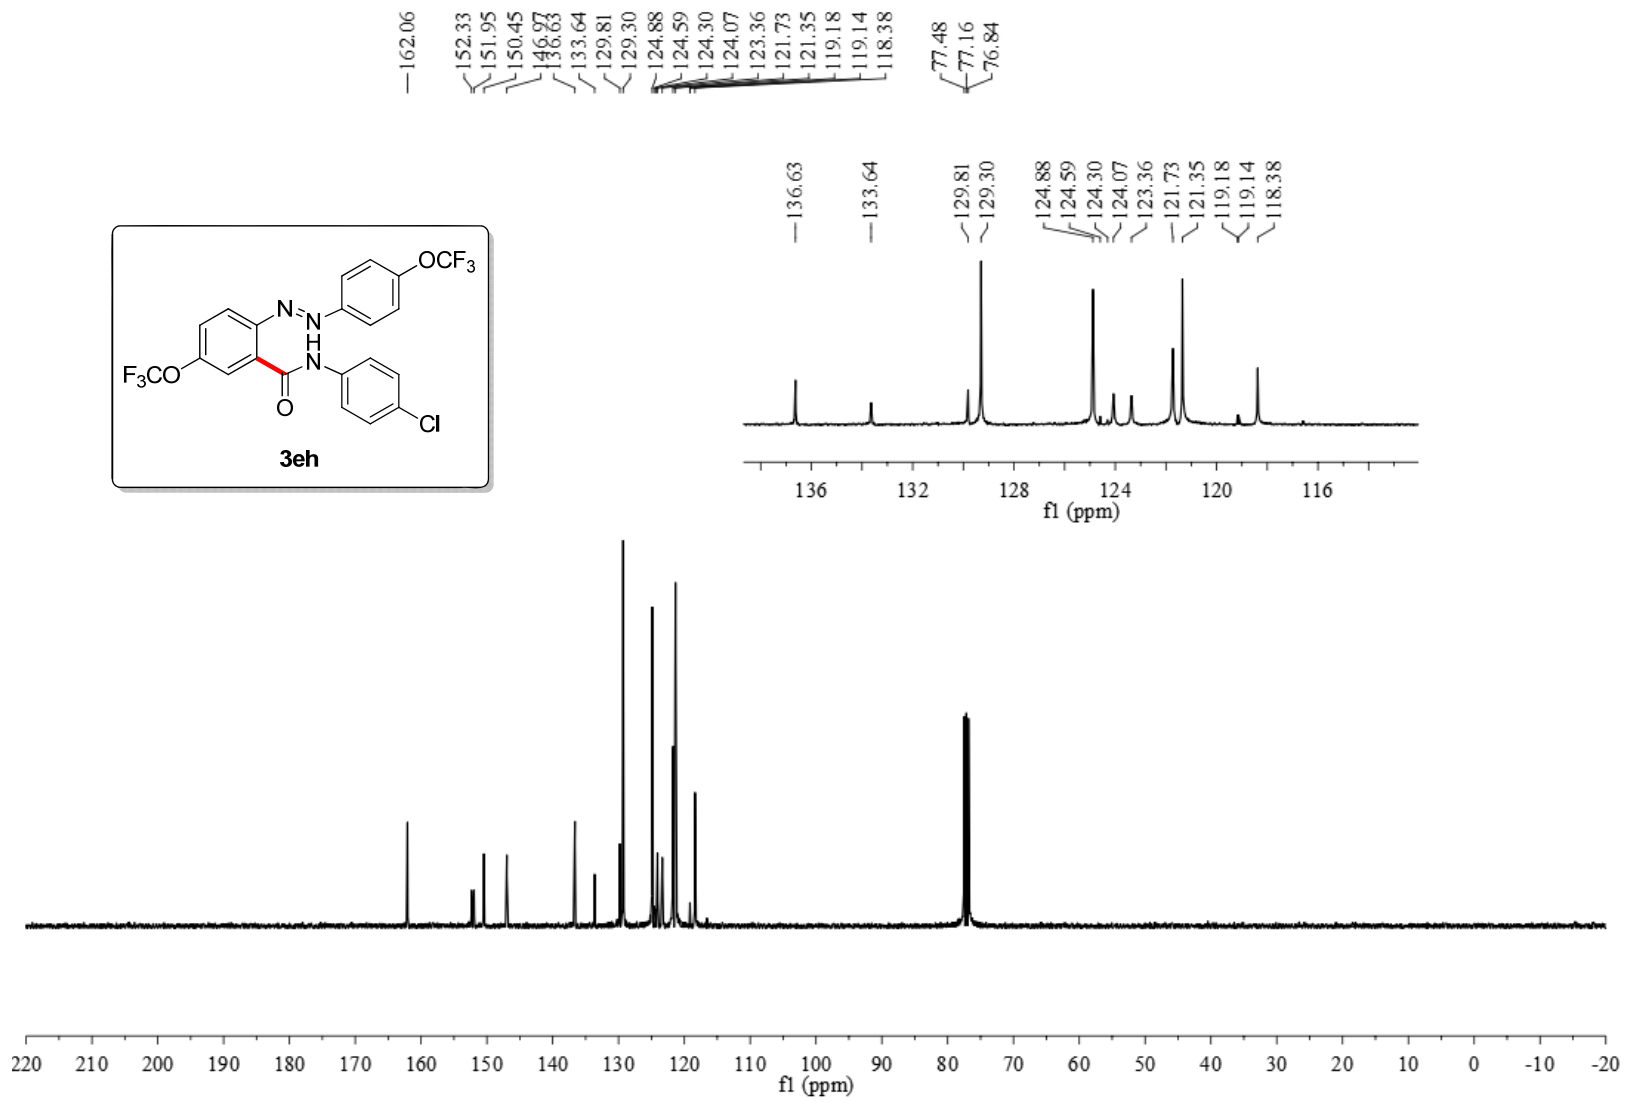

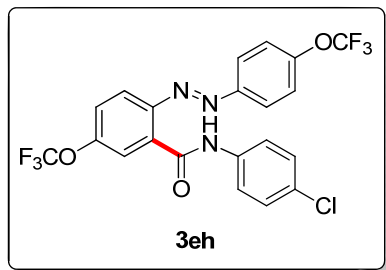

-57.59  
-57.62

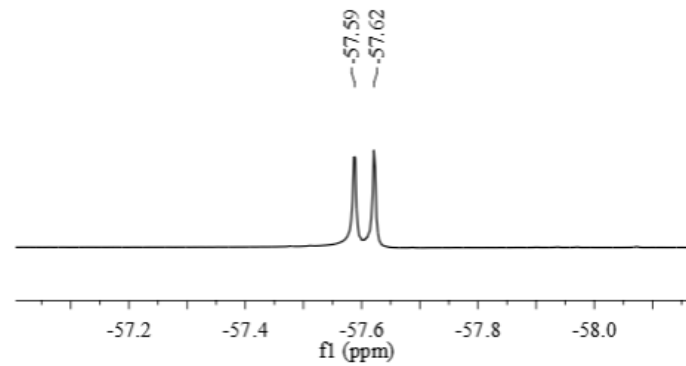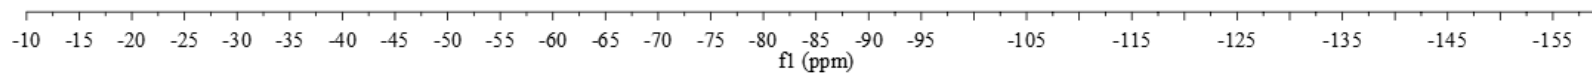

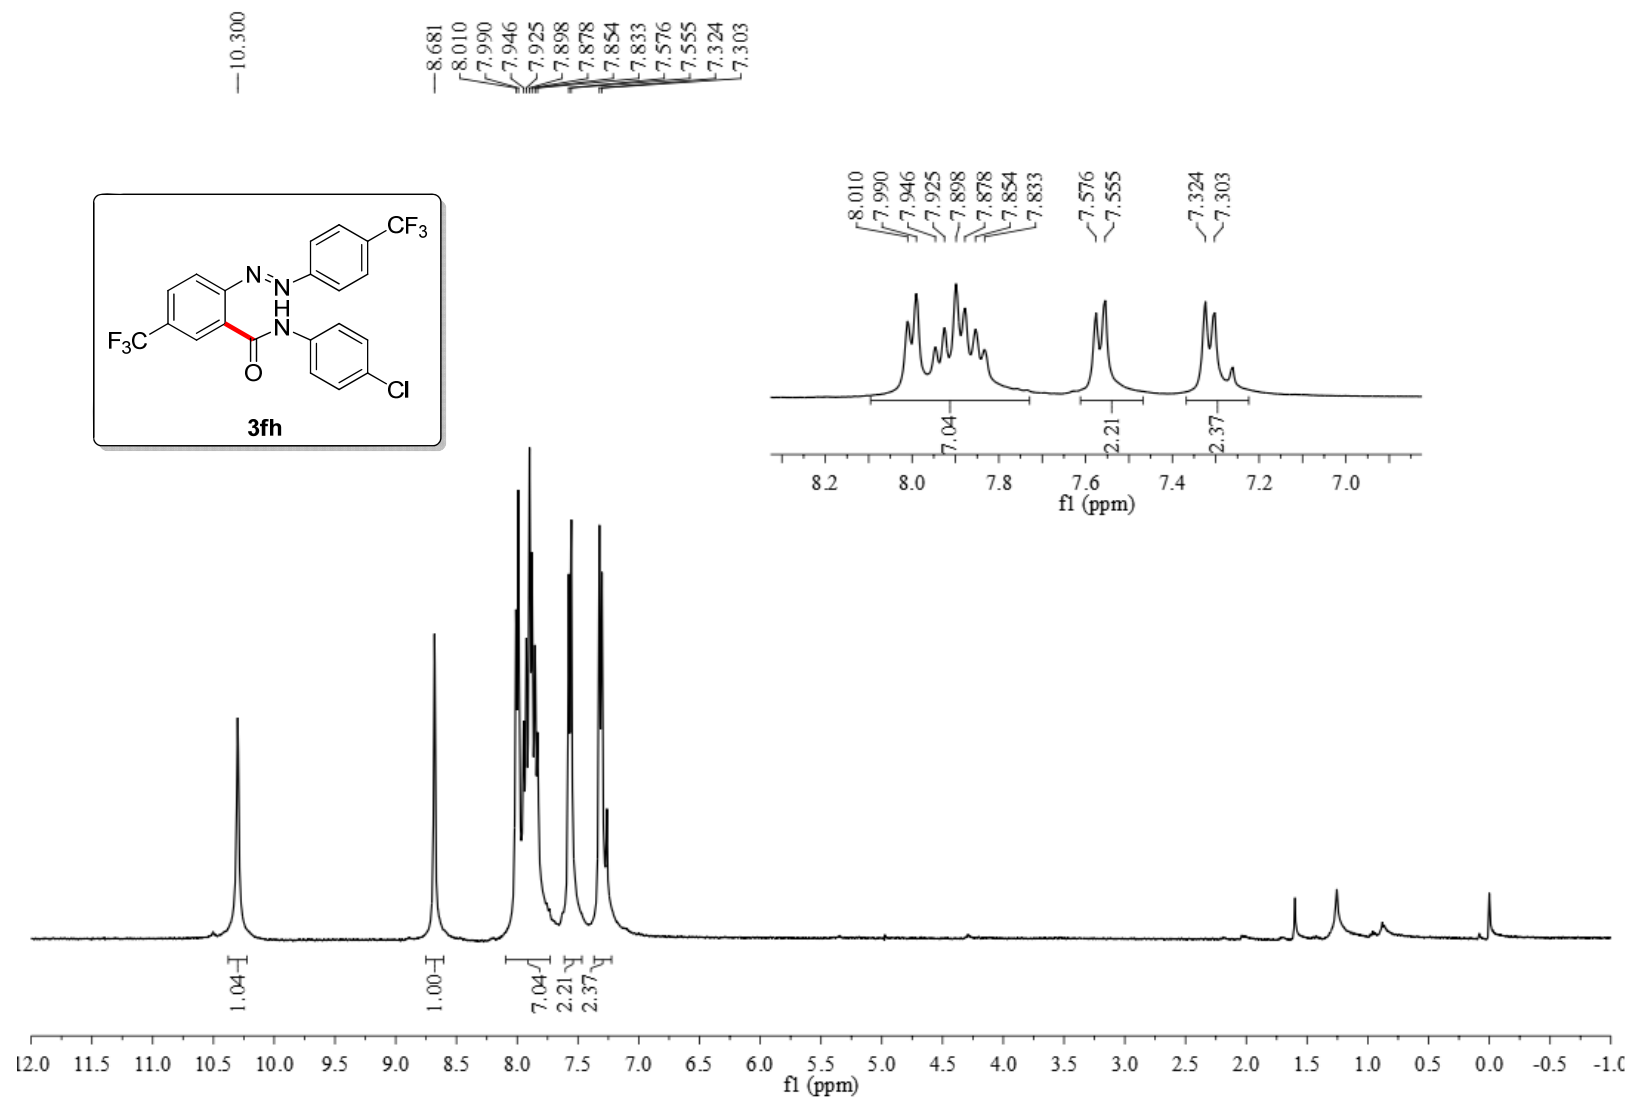

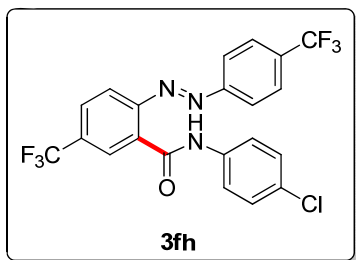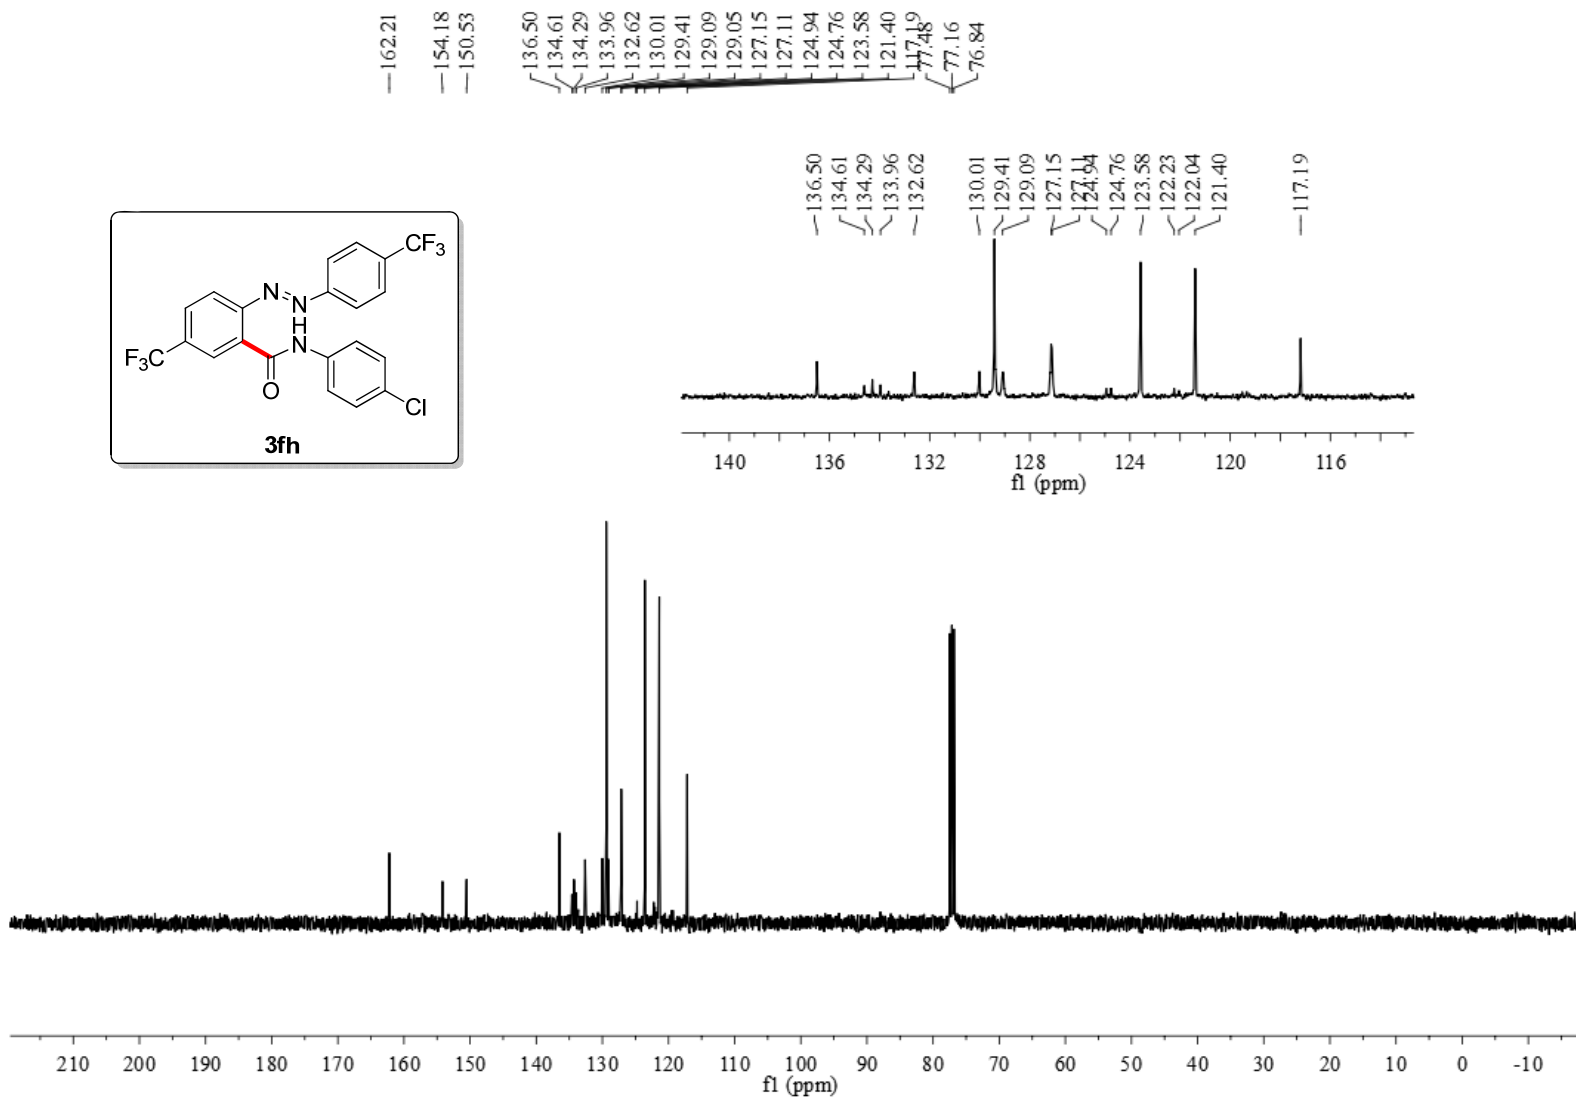

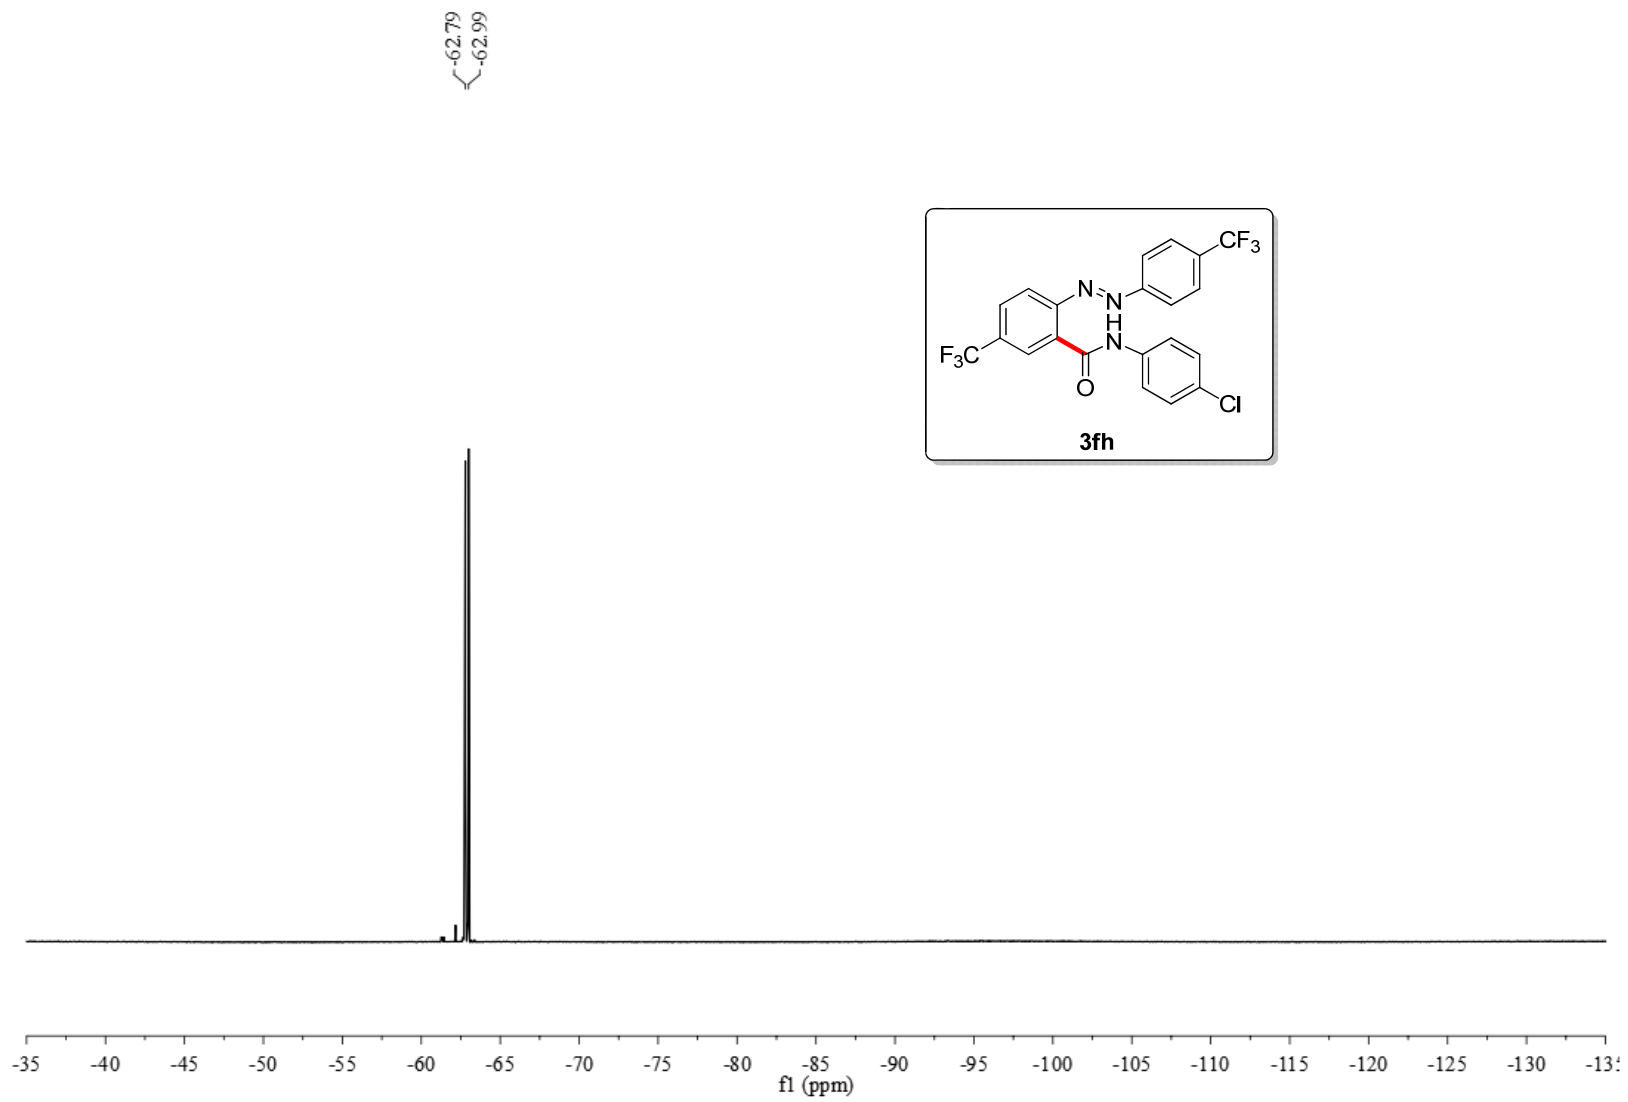

S102

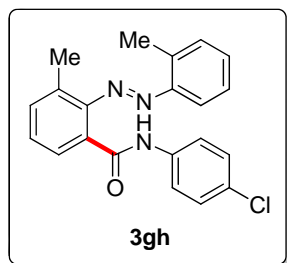

8.895  
7.532  
7.510  
7.486  
7.405  
7.383  
7.361  
7.359  
7.342  
7.324  
7.287  
7.269  
7.256  
7.237  
7.218  
7.204  
7.198  
7.186  
7.167  
7.133  
7.111

2.471  
2.436

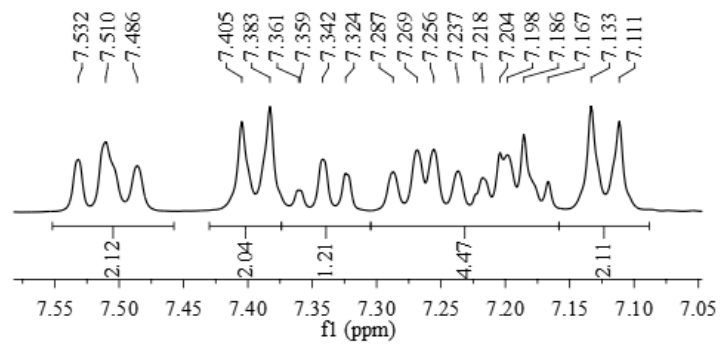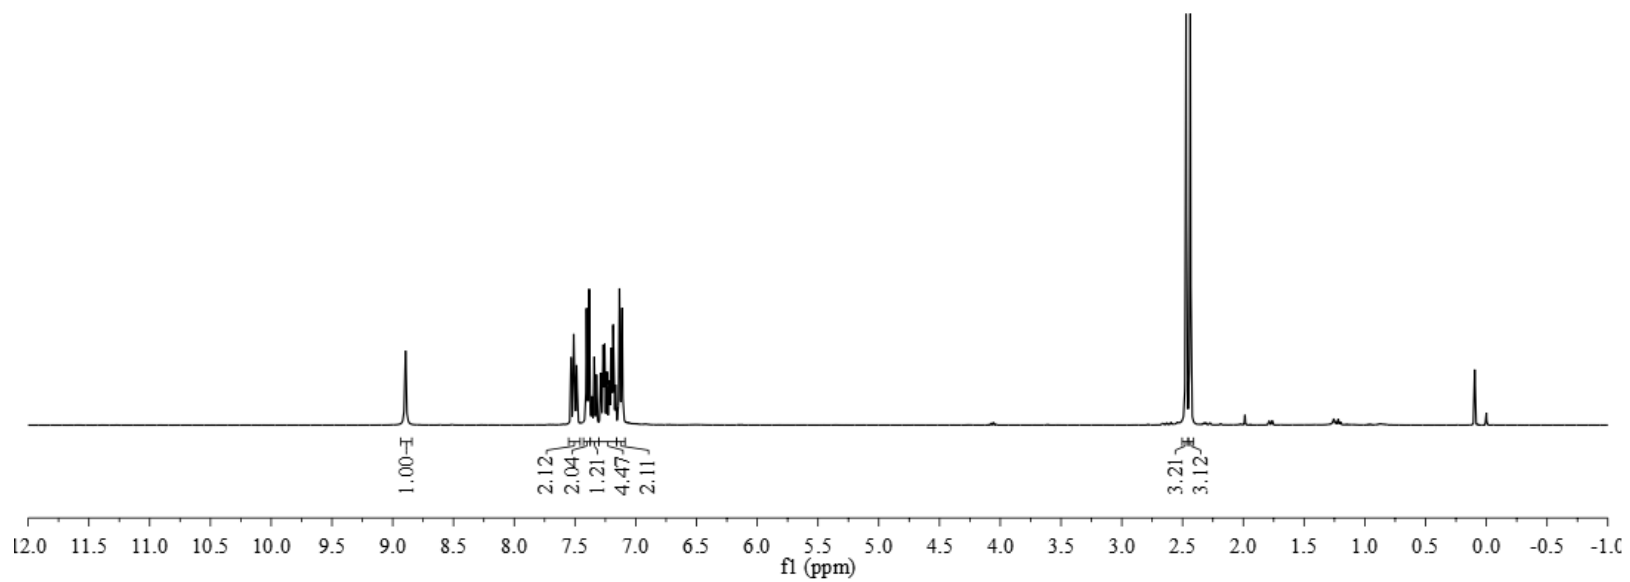

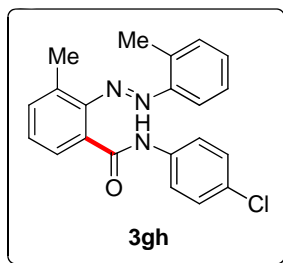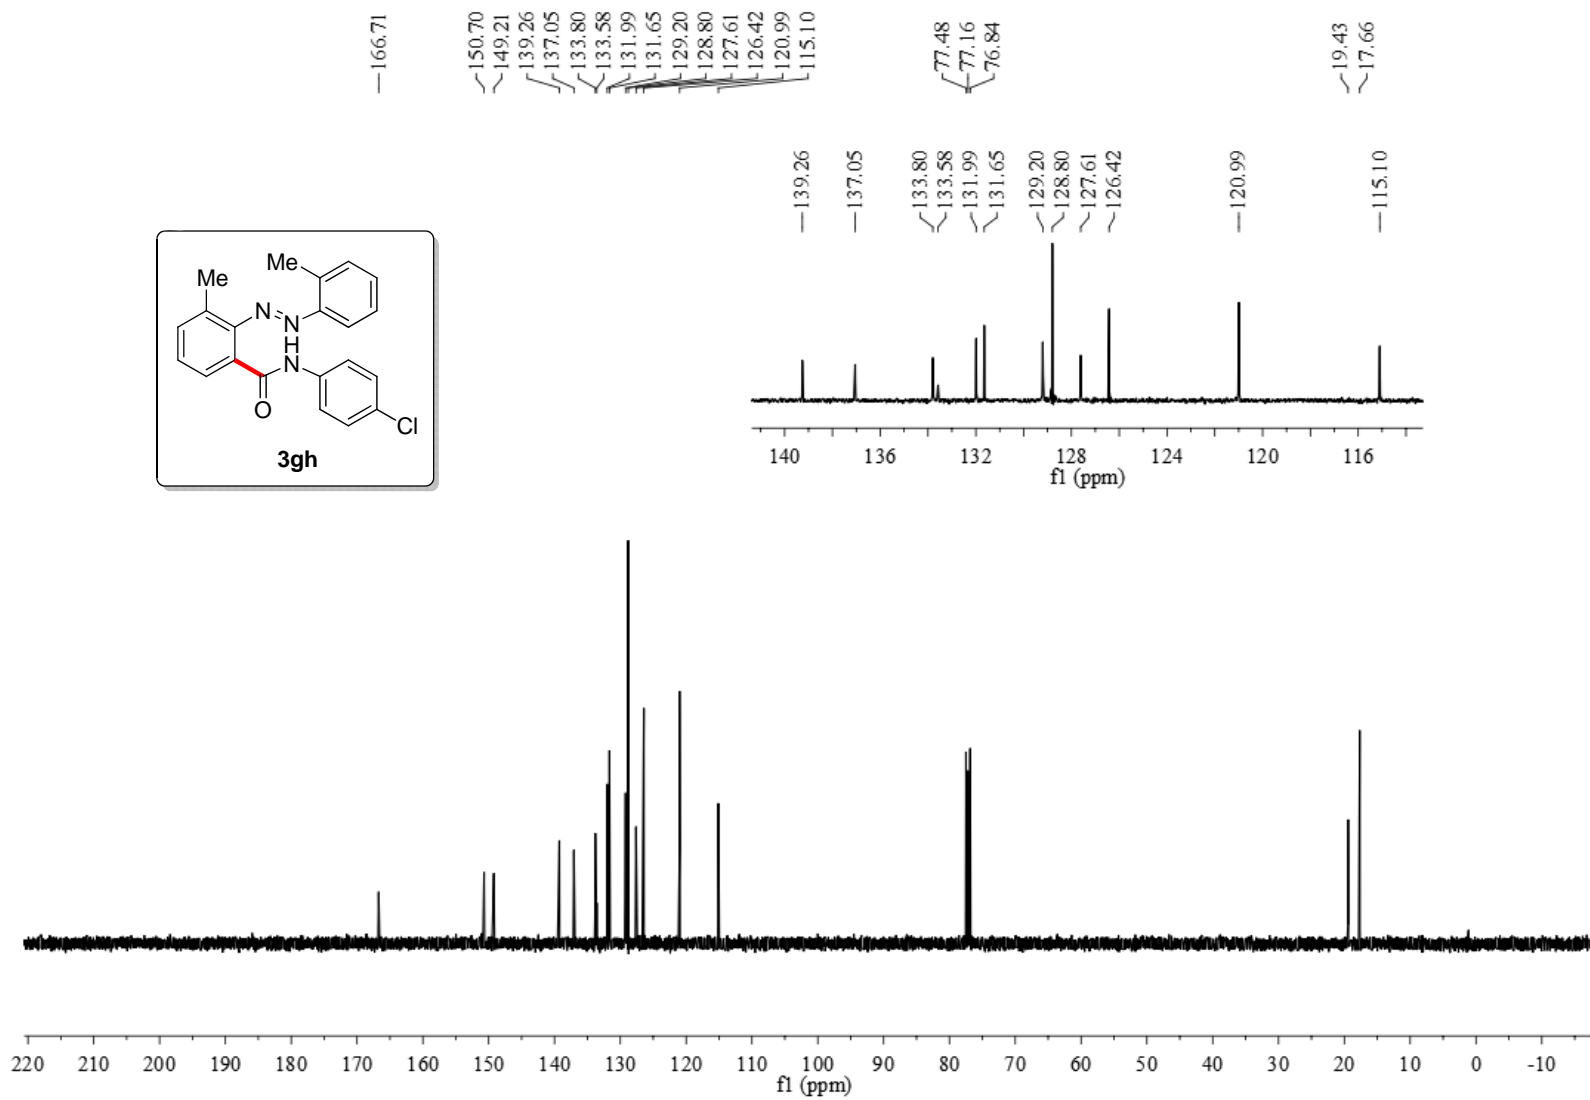



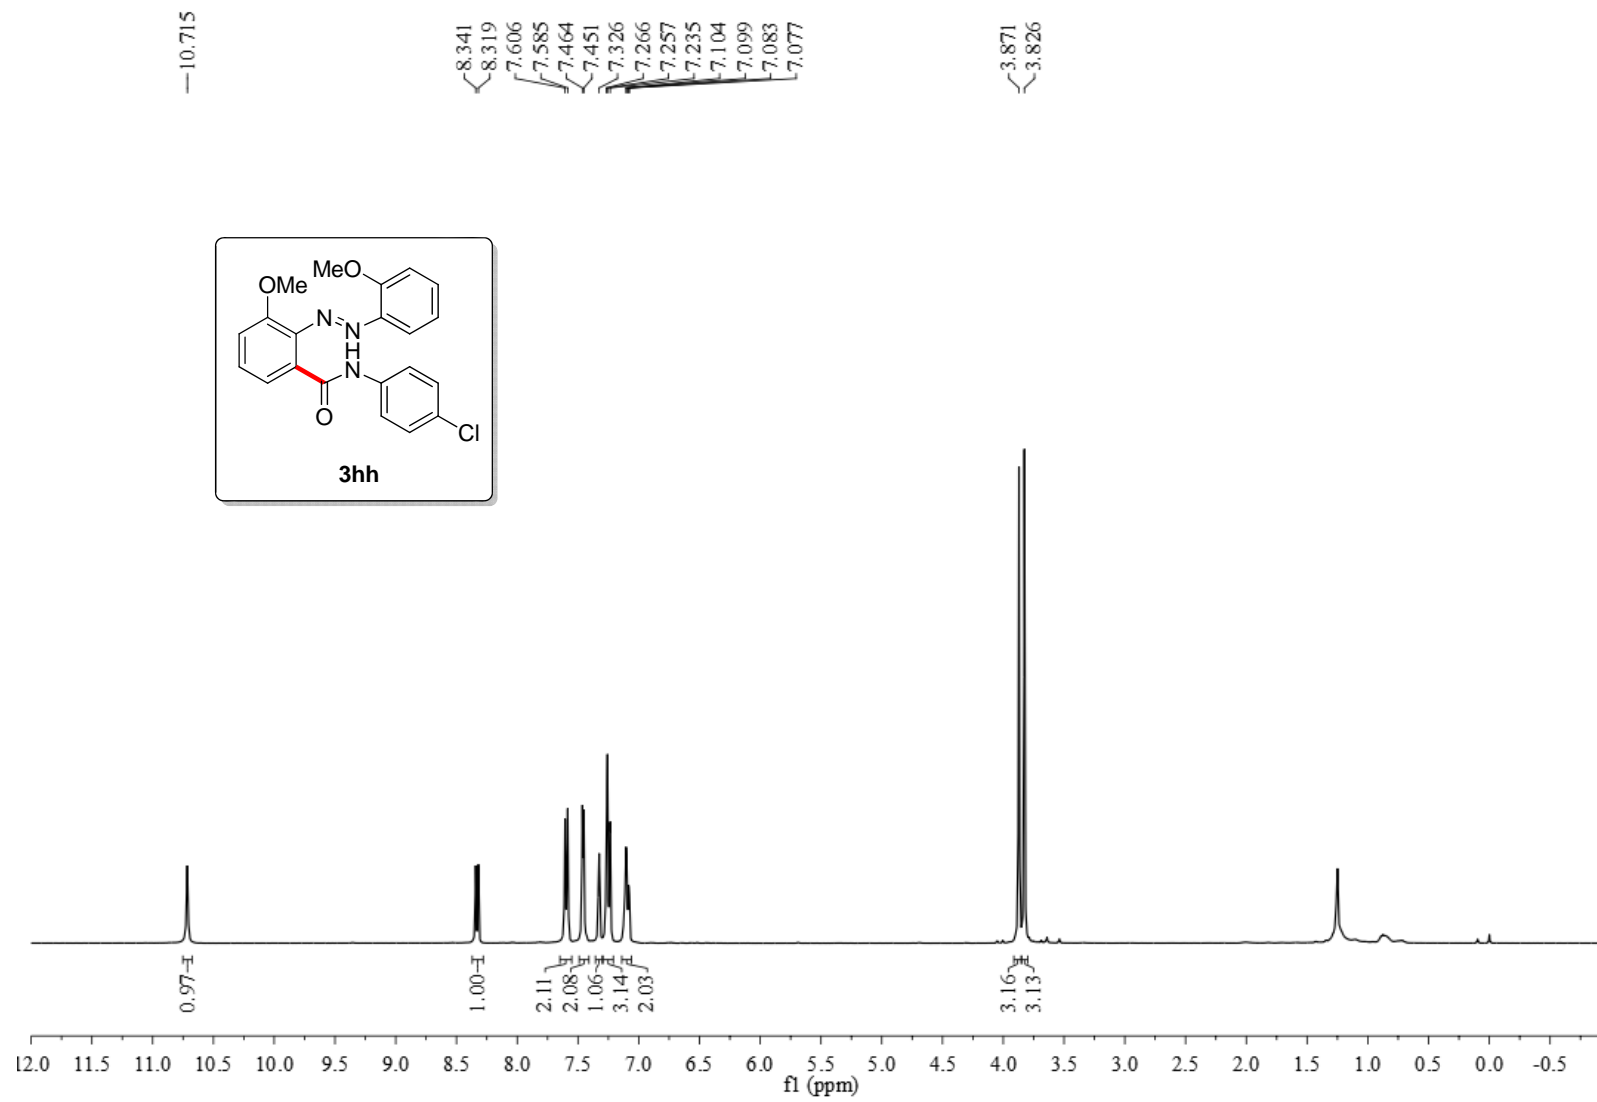

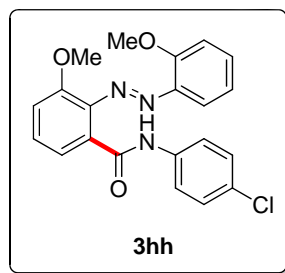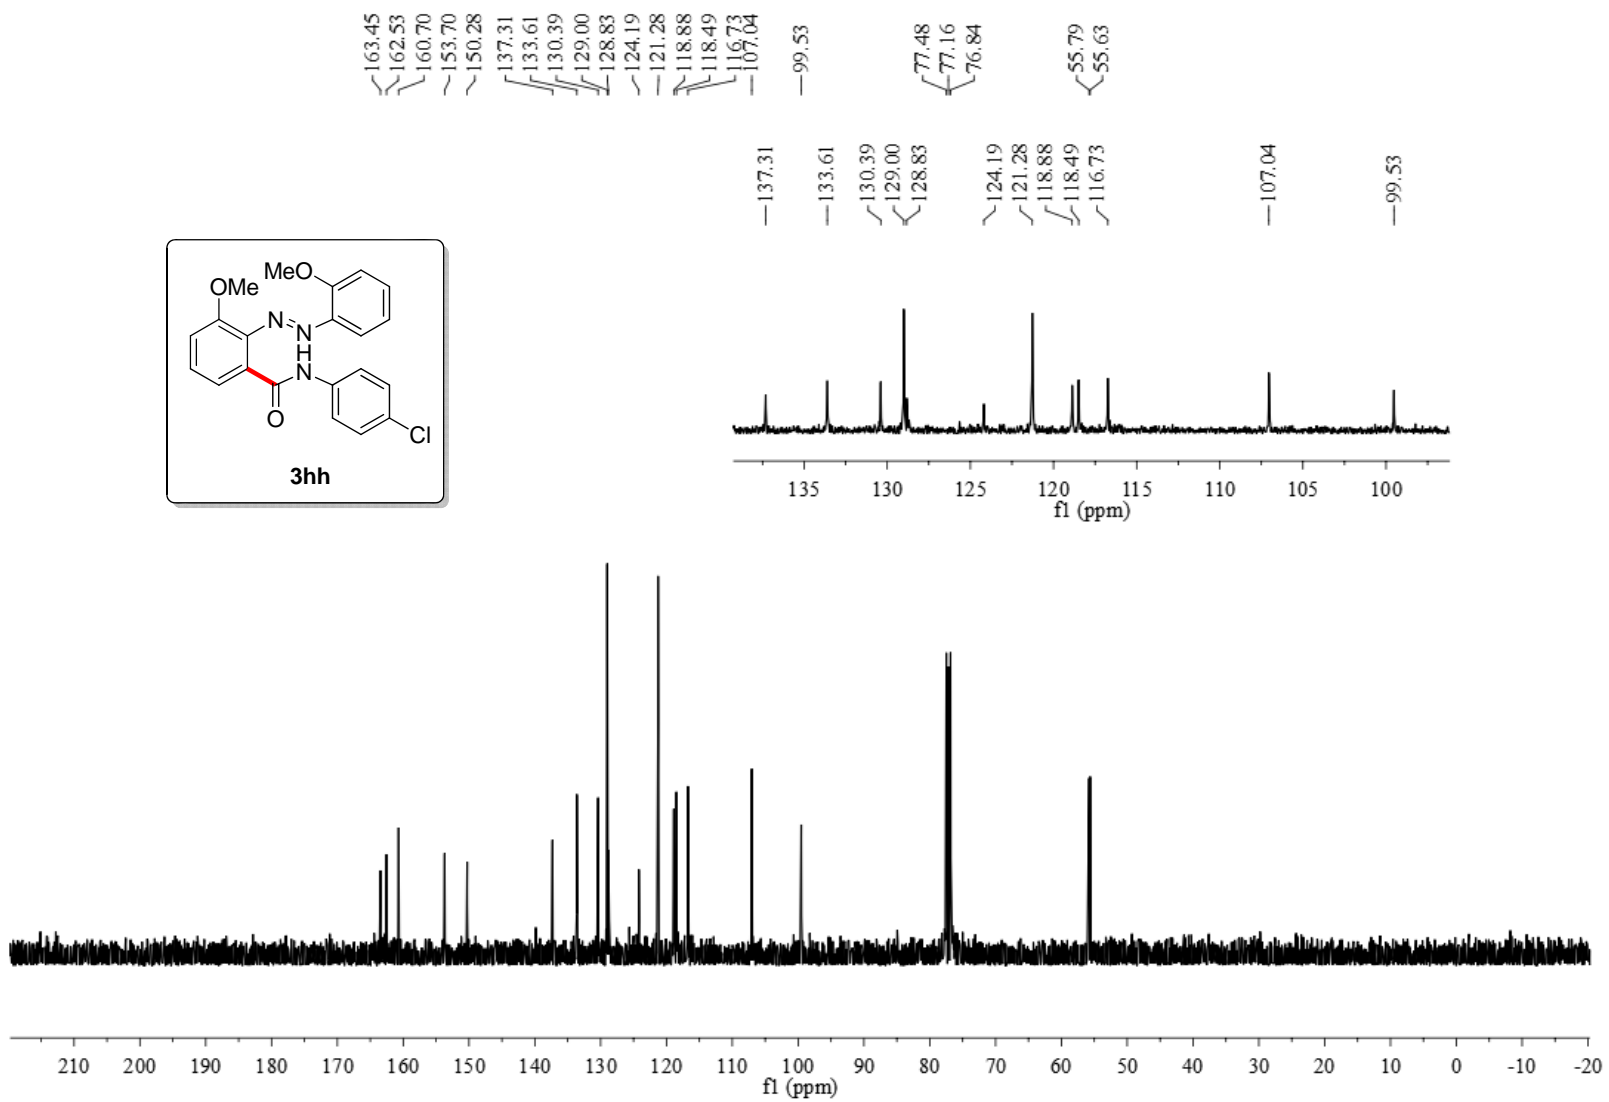

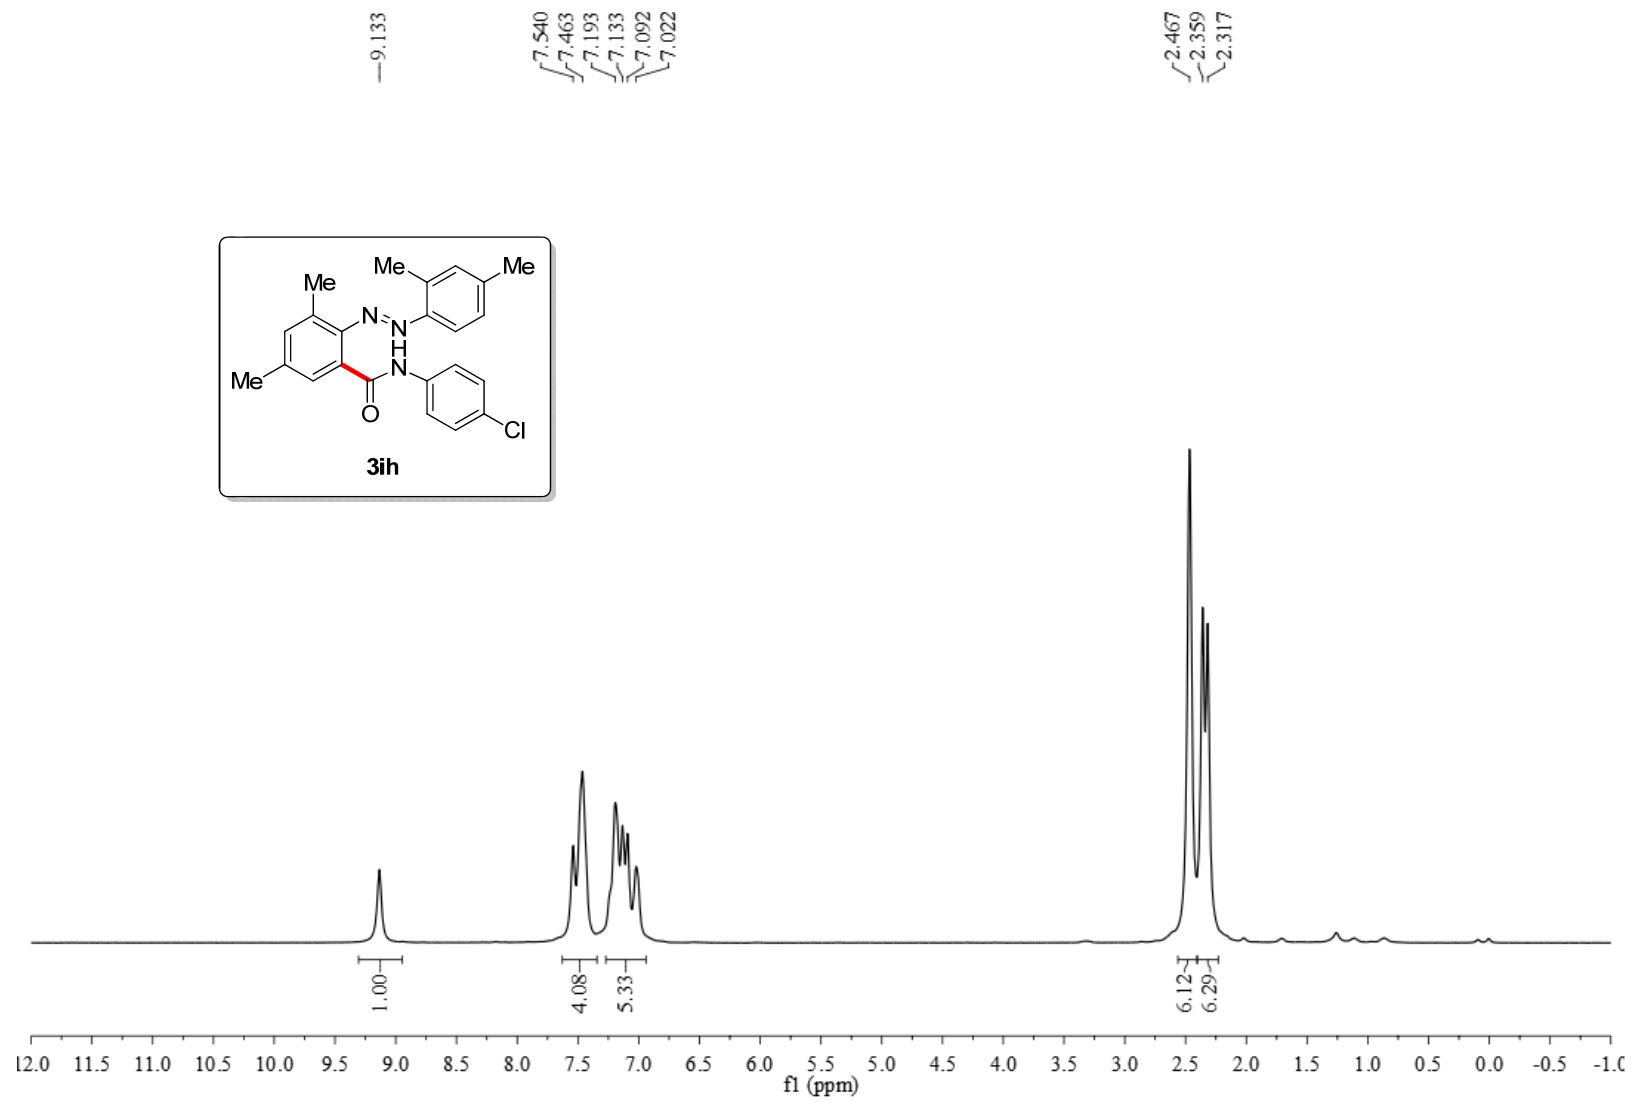

S107

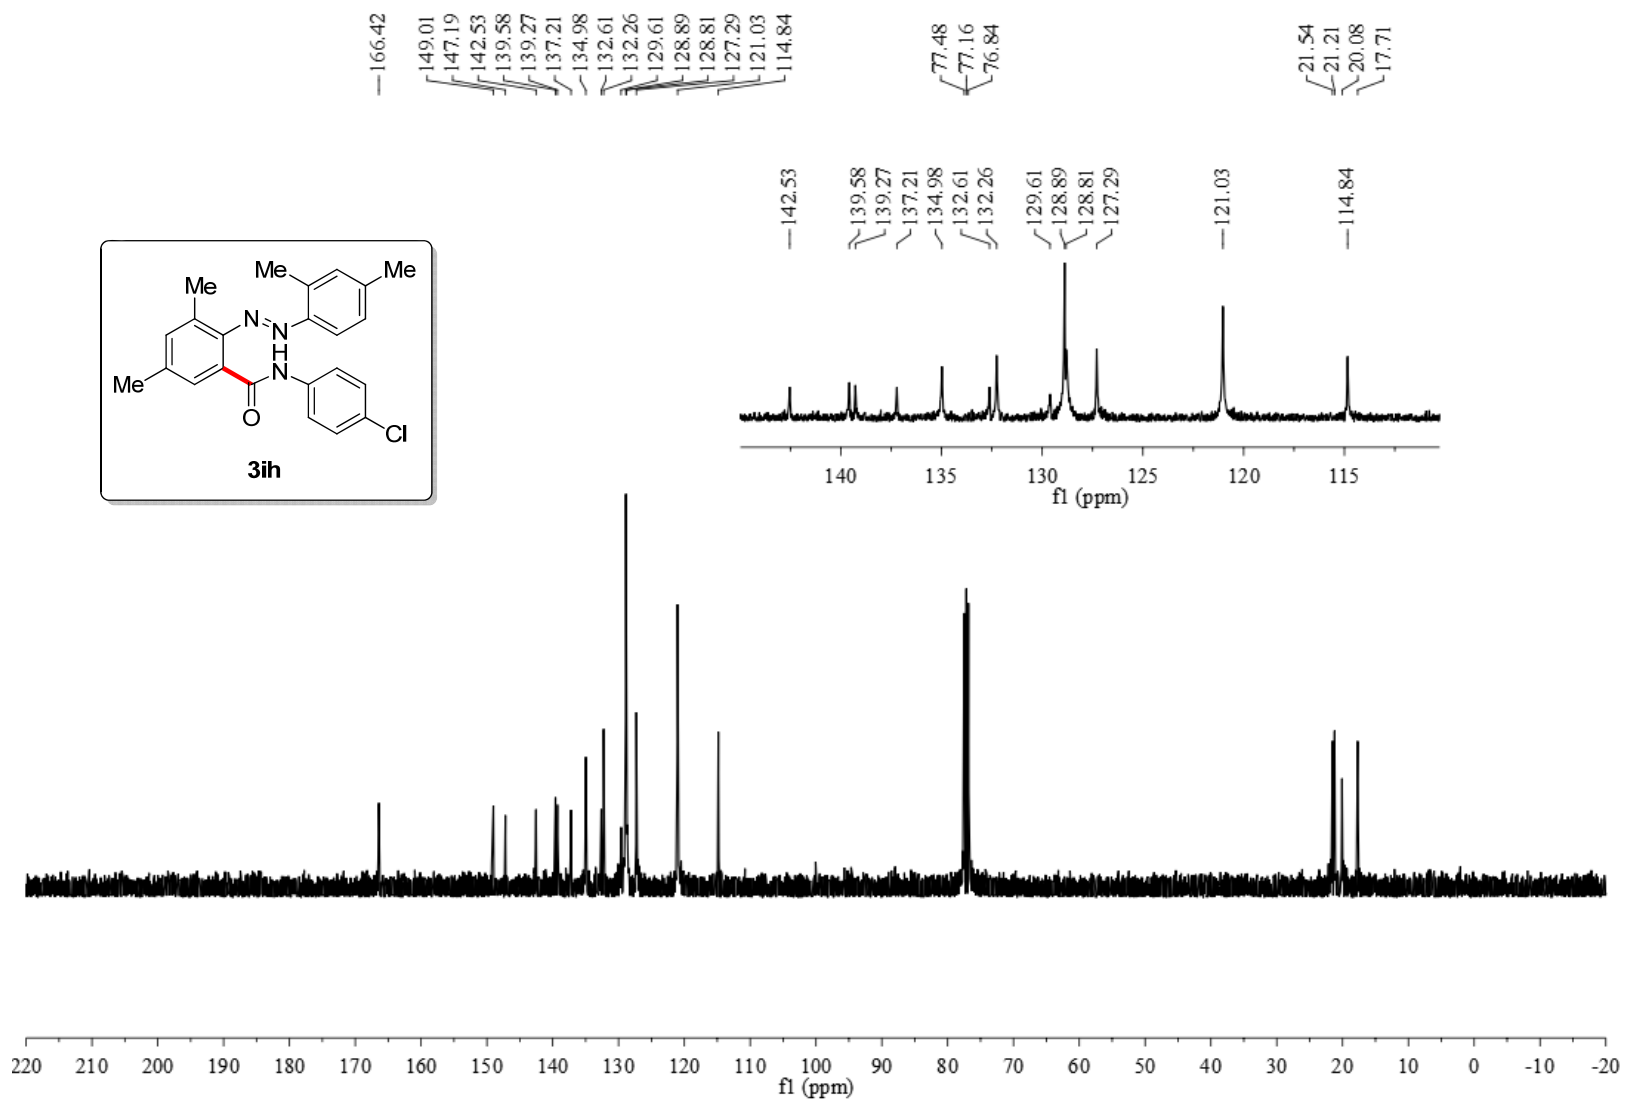

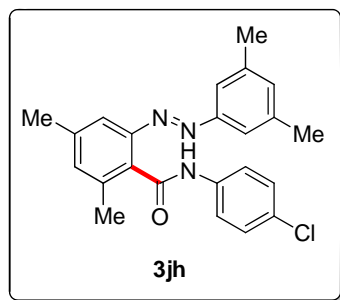

7.785  
7.572  
7.567  
7.555  
7.550  
7.401  
7.371  
7.306  
7.301  
7.289  
7.284  
7.254  
7.124  
7.070

2.451  
2.370  
2.288

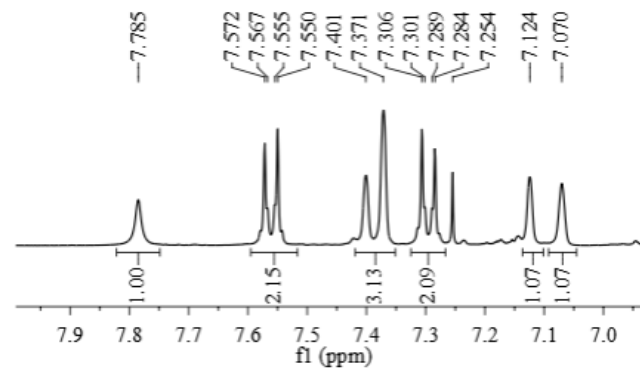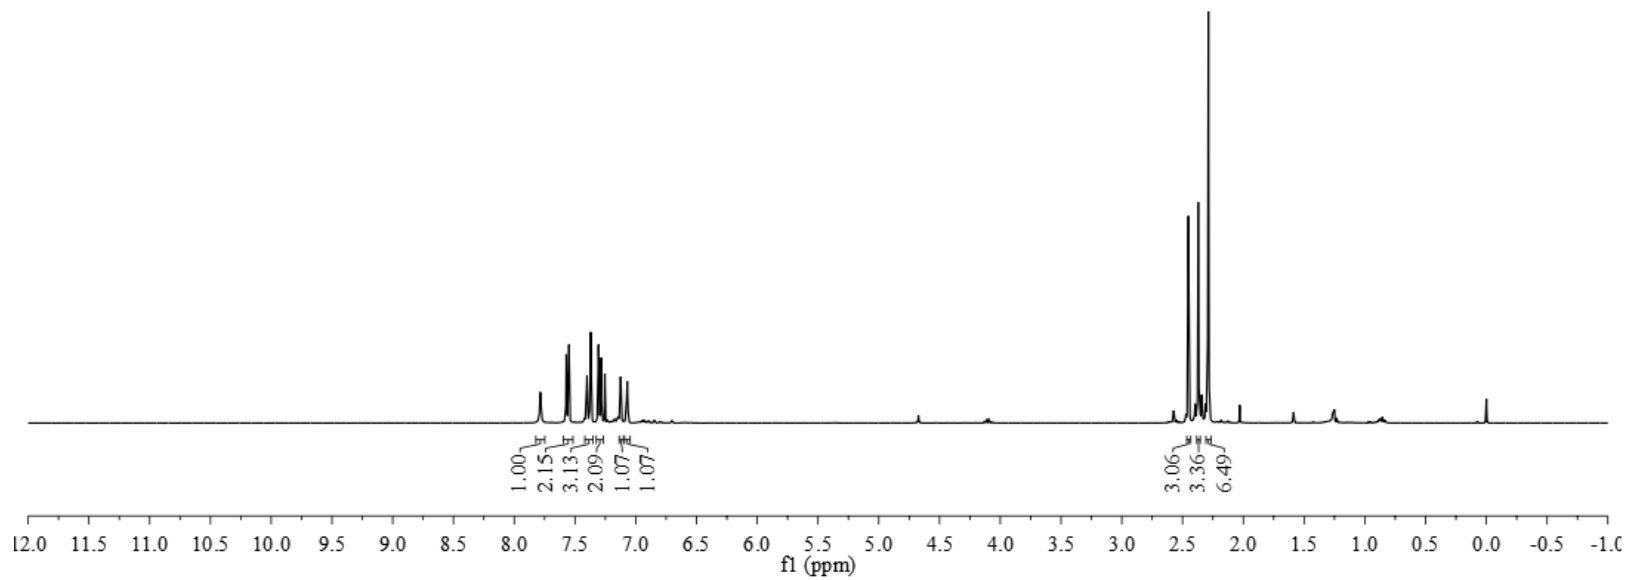

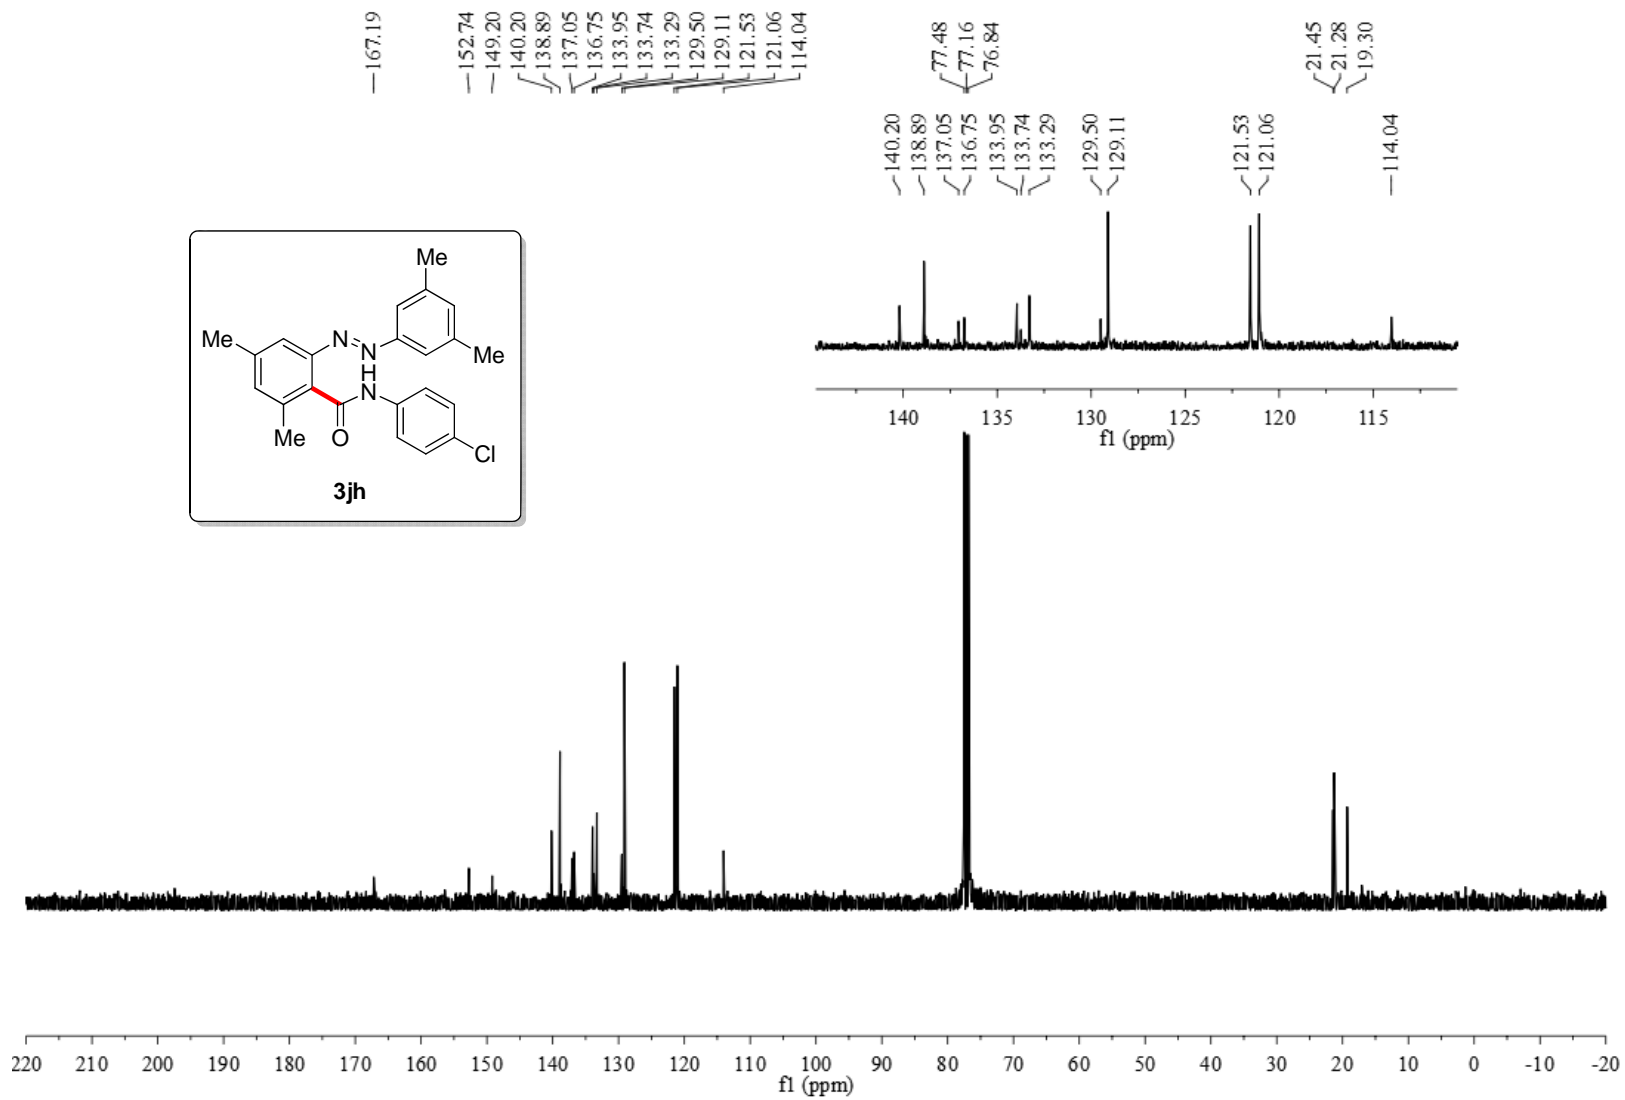

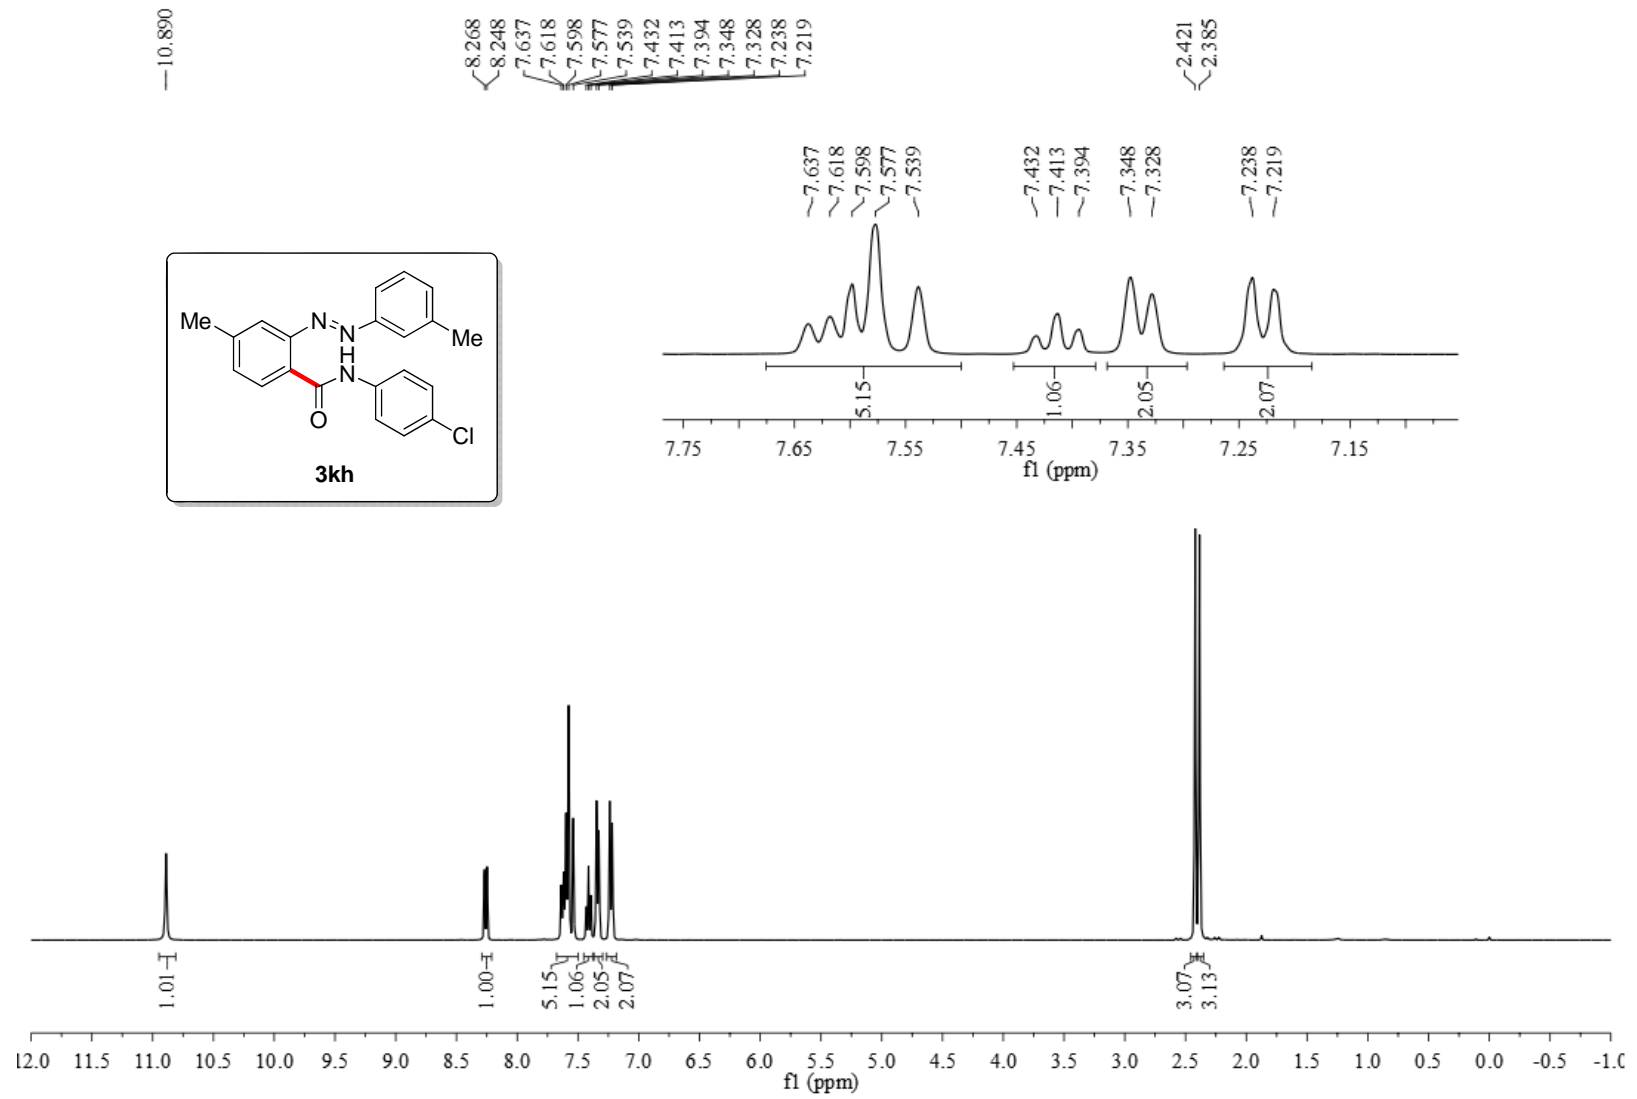

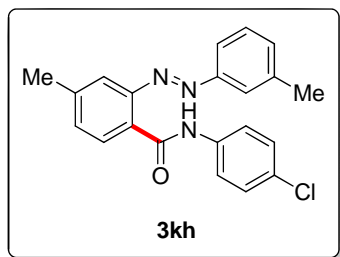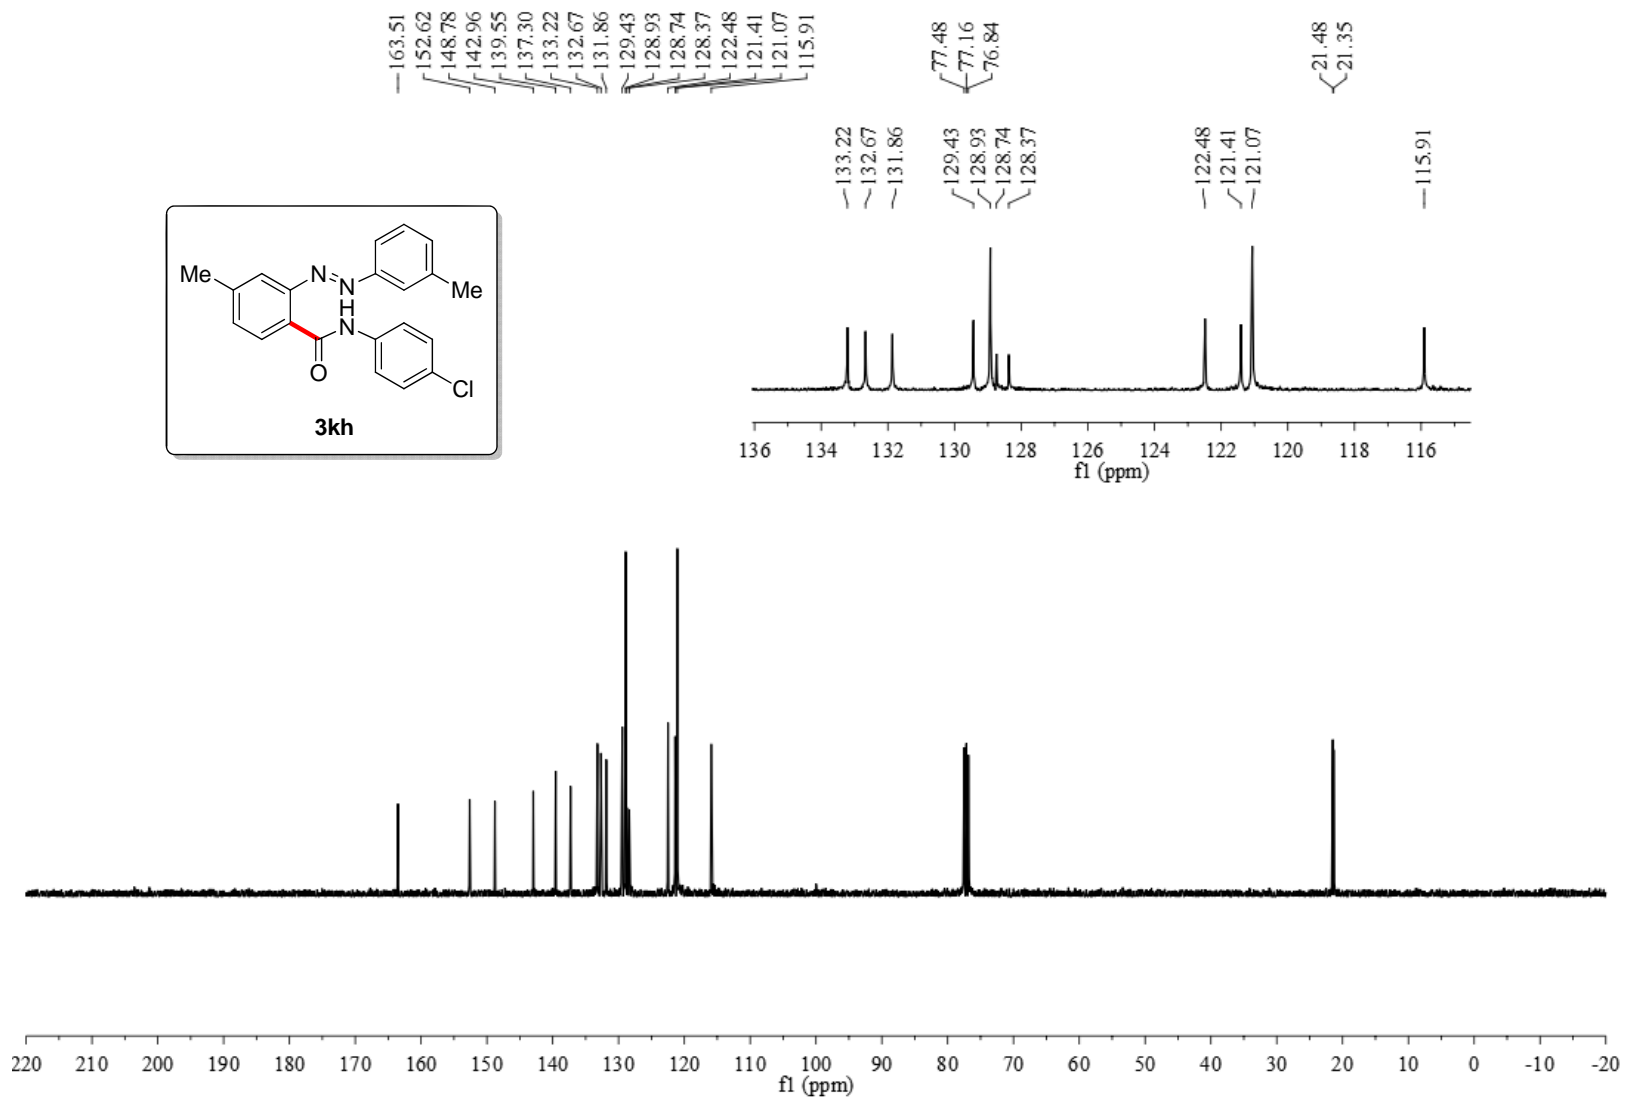



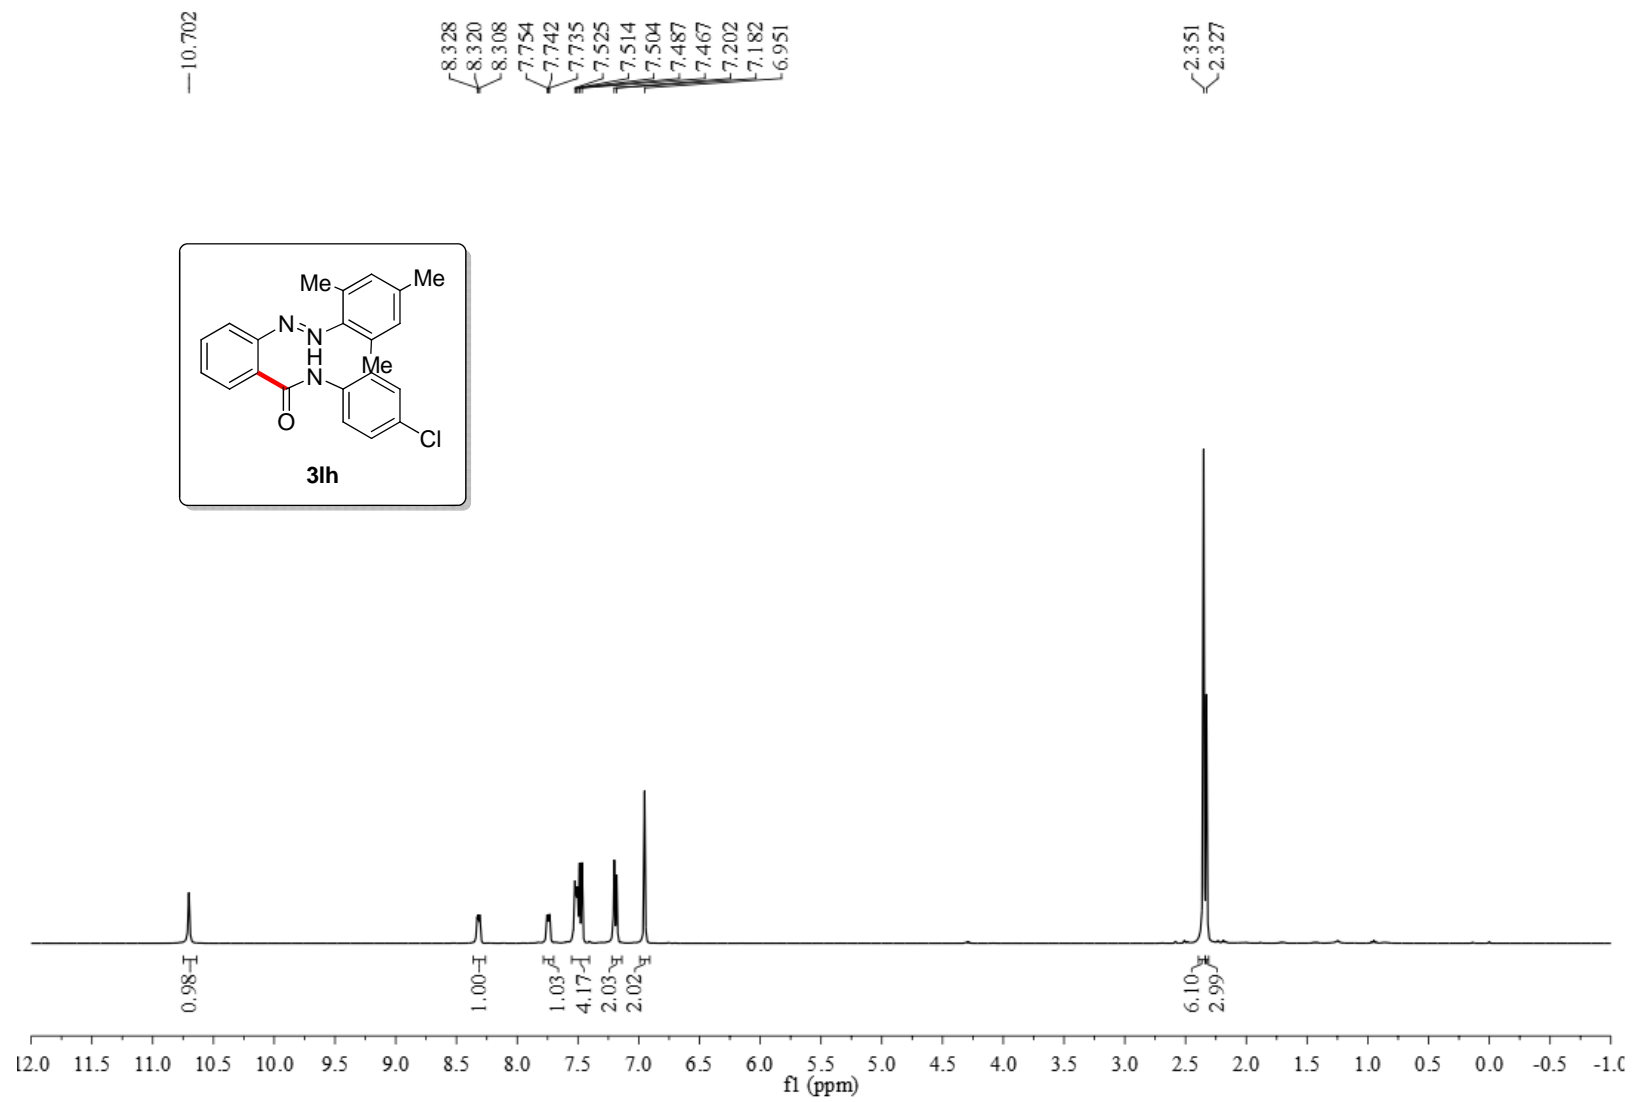

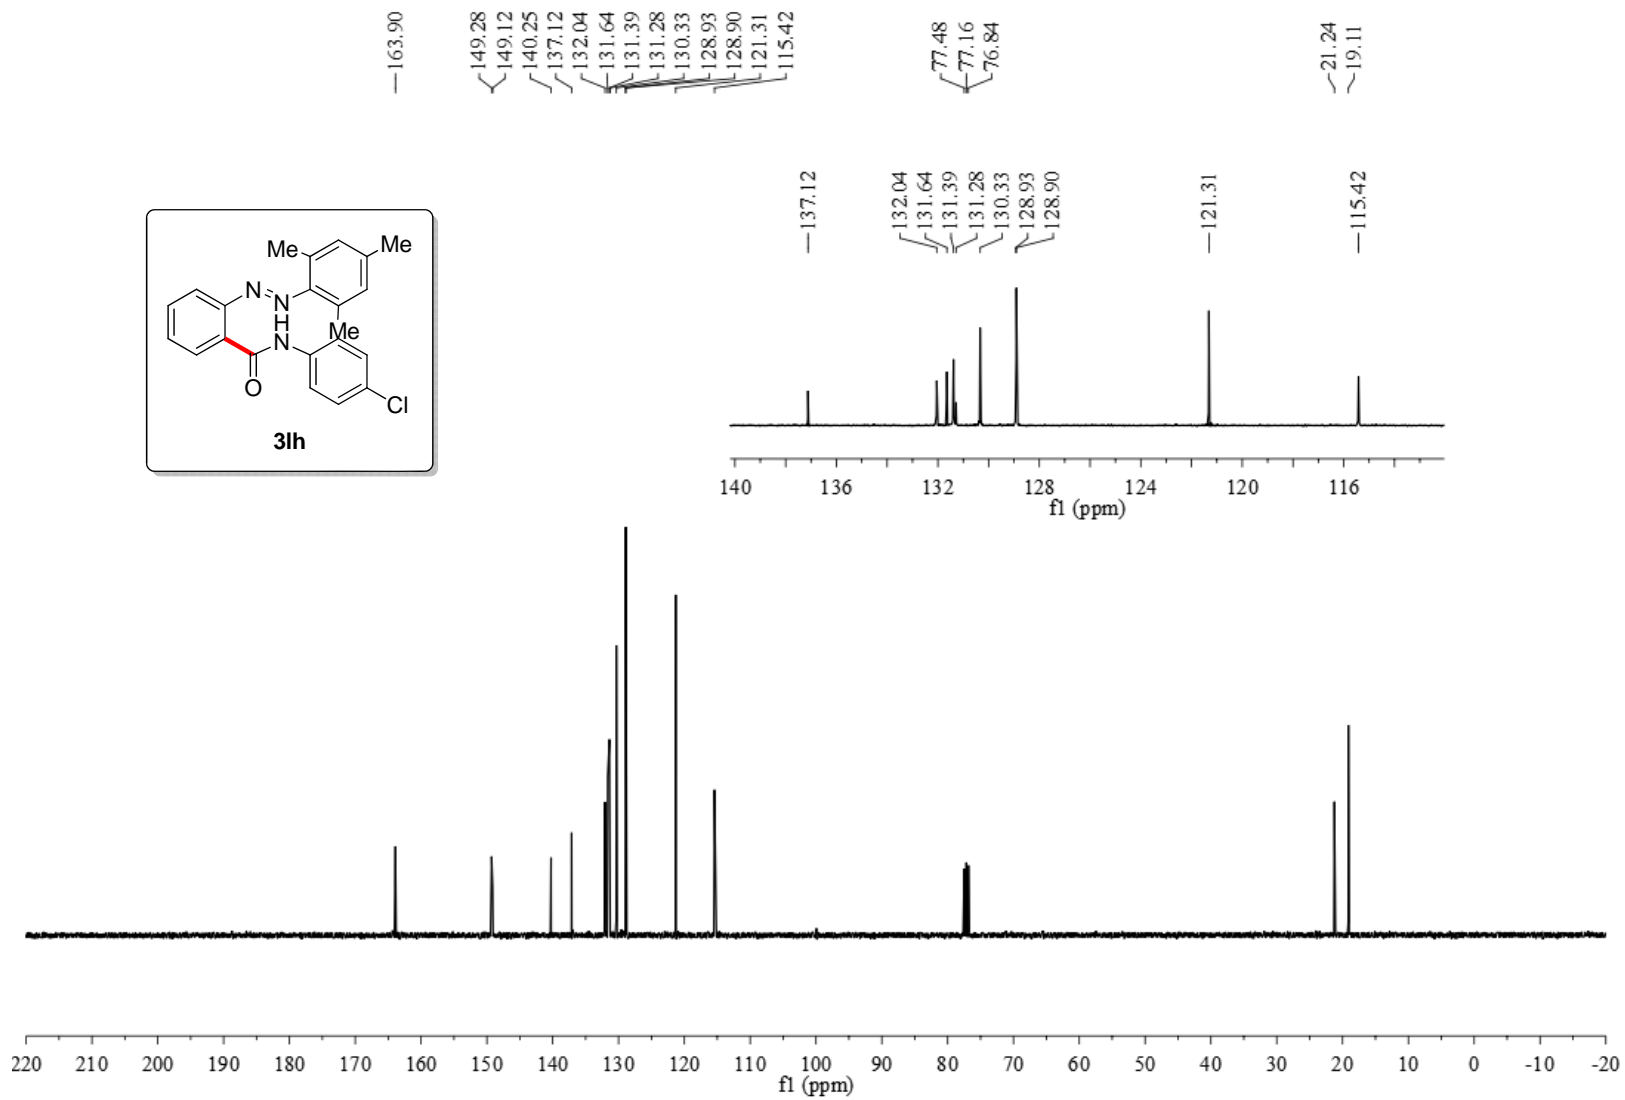

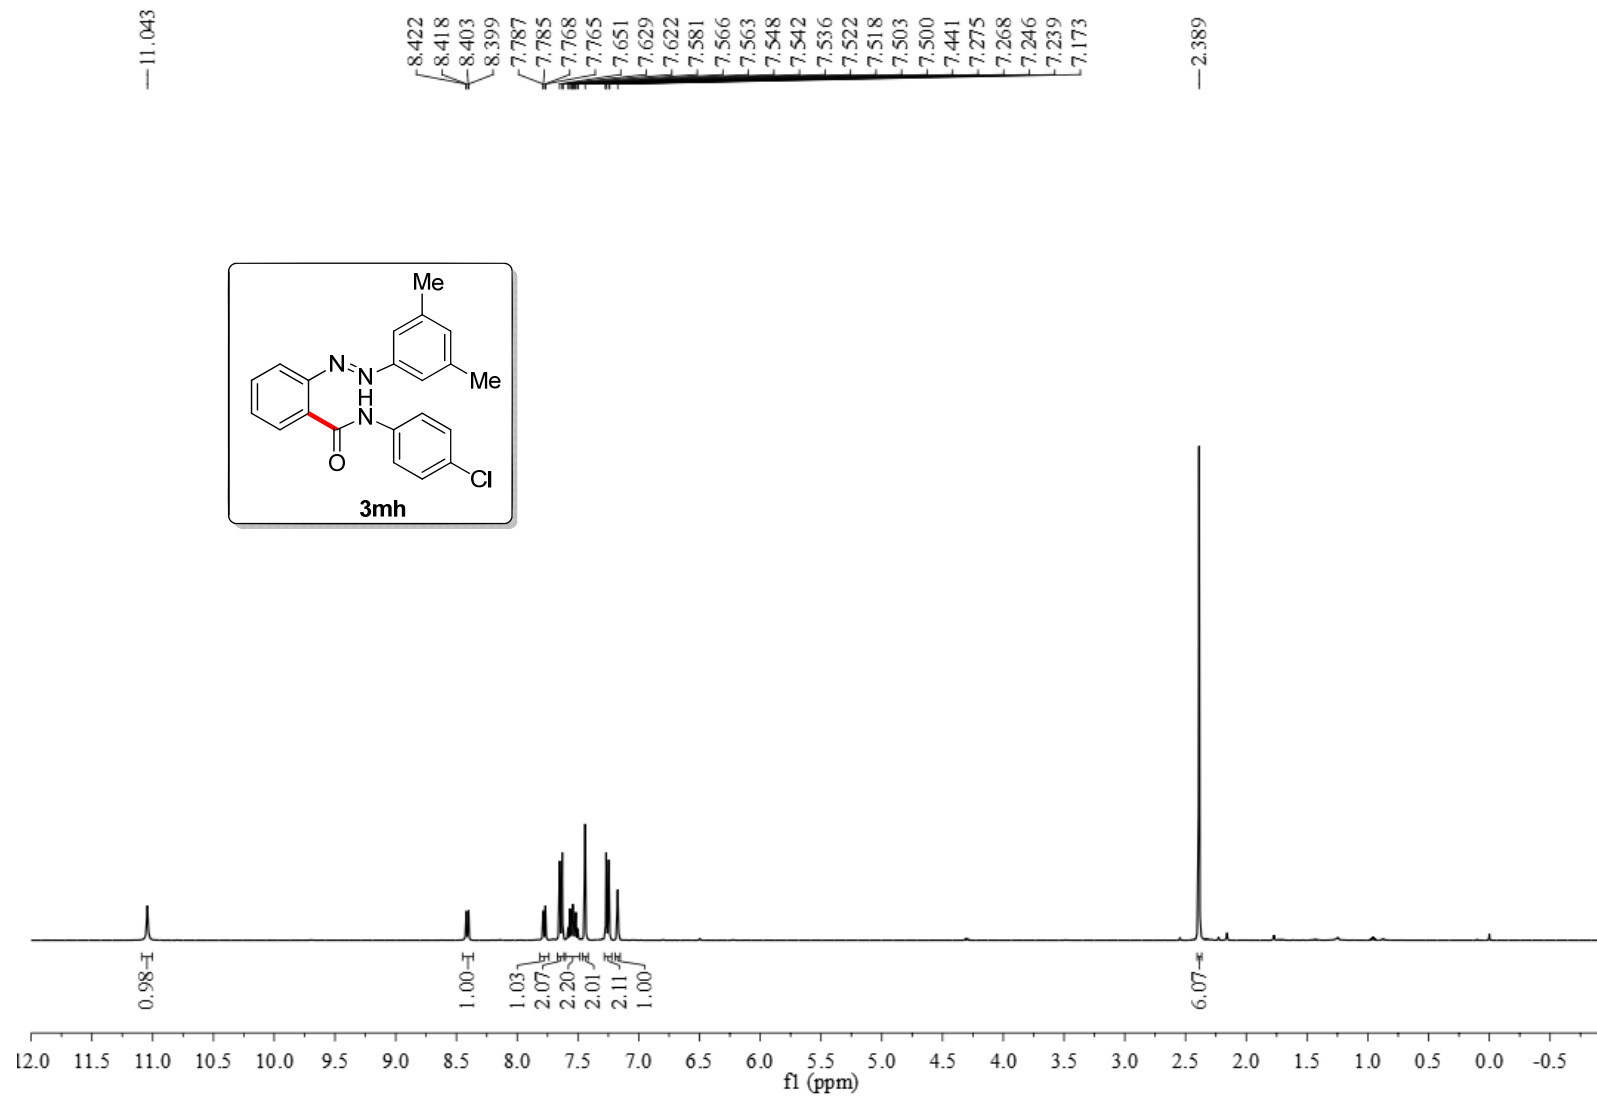

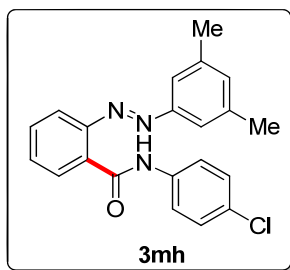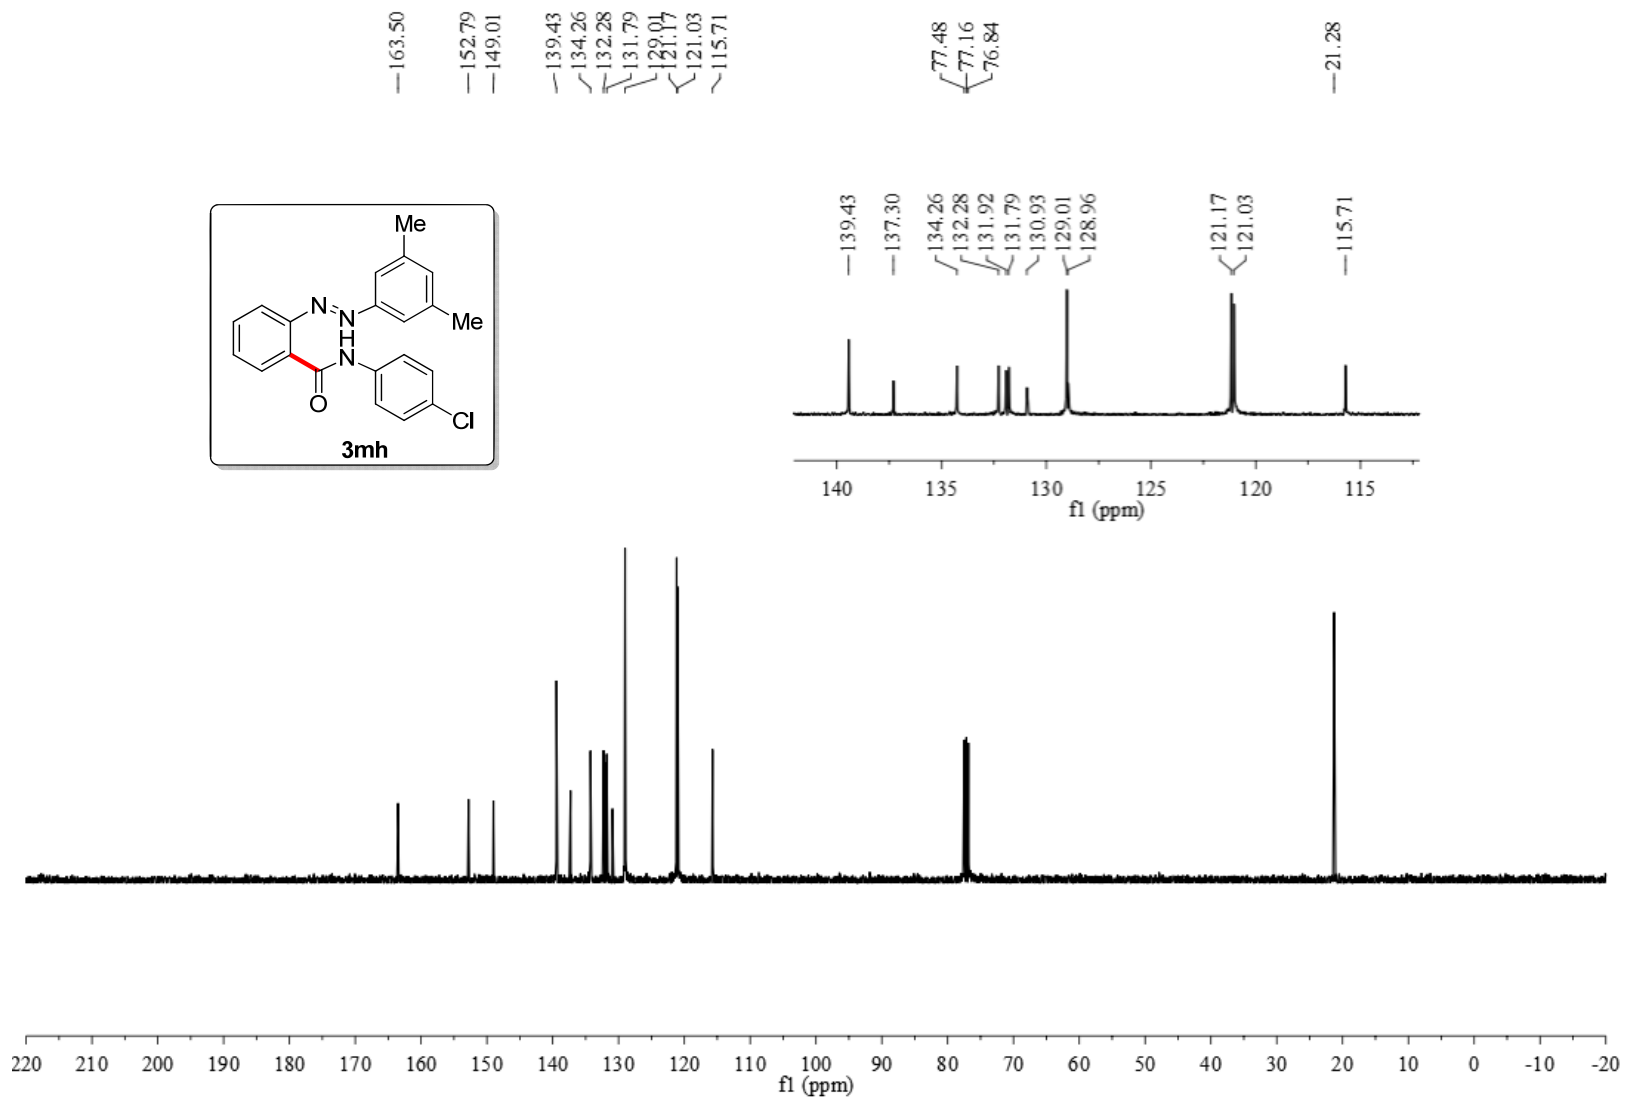

Supplement: c5ob01121c1.pdf [file c5ob01121c1.pdf]
